# Supplementary material for: Proteomic Characterization of High-Density Lipoprotein Particles from Non-Diabetic Hemodialysis Patients
Source: MDPI journal article supplement (doi:10.3390/toxins11110671), 2019-11-15
Supplement: s1 [file s1]

| Supplementary Table S5<br>Reduced PTDGS abundance in anuric<br>HD patients |                      |                  |
|----------------------------------------------------------------------------|----------------------|------------------|
|                                                                            | PTGDS ratio (HD/CTL) |                  |
|                                                                            | Lower<br>than 1      | Higher<br>than 1 |
| Anuric                                                                     | 6                    | 0                |
| Diuresis >100 cc                                                           | 0                    | 3                |
| <i>Fisher's exact test, p=0.012</i>                                        |                      |                  |
