# Supplementary material for: Proteomic Characterization of High-Density Lipoprotein Particles from Non-Diabetic Hemodialysis Patients
Source: Toxins (Basel). 2019 Nov 15;11(11):671. doi: 10.3390/toxins11110671 (PMC6891510; doi:10.3390/toxins11110671)
Supplement: Supplementary file 1 [file toxins-11-00671-s001.zip]

Archive with 16 entries (15 files):
- Supplementary_files_R1/
- __MACOSX/._Supplementary_files_R1
- Supplementary_files_R1/Table S1.xlsx
- __MACOSX/Supplementary_files_R1/._Table S1.xlsx
- Supplementary_files_R1/.DS_Store
- __MACOSX/Supplementary_files_R1/._.DS_Store
- Supplementary_files_R1/Table S5.pdf
- __MACOSX/Supplementary_files_R1/._Table S5.pdf
- Supplementary_files_R1/Table S4.xlsx
- __MACOSX/Supplementary_files_R1/._Table S4.xlsx
- Supplementary_files_R1/Table S3.xlsx
- __MACOSX/Supplementary_files_R1/._Table S3.xlsx
- Supplementary_files_R1/figure S1.jpg
- __MACOSX/Supplementary_files_R1/._figure S1.jpg
- Supplementary_files_R1/Table S2.xlsx
- __MACOSX/Supplementary_files_R1/._Table S2.xlsx
