# Supplementary material for: Proteomic Characterization of High-Density Lipoprotein Particles from Non-Diabetic Hemodialysis Patients
Source: Toxins (Basel). 2019 Nov 15;11(11):671. doi: 10.3390/toxins11110671 (PMC6891510; doi:10.3390/toxins11110671)
Supplement: Supplementary file 1 [file toxins-11-00671-s001.zip › Supplementary_files_R1/Table S1.xlsx]

## Sheet: Summary
	"Proteins" sheet :		Proteins identified and quantified in the all raw files. Ratios are calculated as mean of HDL samples / mean of the Control samples
	"Control (at least 5 of 8)" sheet :		Proteins found in at least 5 of 8 "Control" samples
	"H (at least 6 of 9)" sheet :		Proteins found in at least 6 of 9 "H" samples
	"Control (5 of 8) + H (6 of 9)" sheet :		Proteins found in both "Control" and "H" samples or only in "Control" samples or only on "H" samples (with "Control" (5 of 8) and "H" (6 of 9))
	"Prot. present in all samples" sheet :		Proteins found in each of the 17 samples "Control" and "H"
	"Peptides PValue<0.01" sheet :		Peptides quantified with a p-value < 0,01
	"Peptides 0,05<PValue<0.01" sheet :		Peptides quantified with a p-value between 0,05 and 0,01
	The data are extracted from the result file "Identified_and_quantified_proteins_in_HDL_and_Control_Samples.mzid" submitted to the ProteomeXchange consortium

## Sheet: Proteins
														Control samples																								HD samples
		High	identified and quantified protein
		Peak found	no MSMS spectra but quantified
		Not Found	no identification and no quantification
Protein FDR Confidence: Combined	Master	Accession	Description	Coverage [%]	# Peptides	# PSMs	# Unique Peptides	# AAs	MW [kDa]	calc. pI	Abundance Ratio: (HDL) / (Control)	Abundance Ratio (log2): (HDL) / (Control)	Abundance Ratio P-Value: (HDL) / (Control)	C7, Replicate 1	C7, Replicate 2	C7, Replicate 3	C9, Replicate 1	C9, Replicate 2	C9, Replicate 3	C10, Replicate 1	C10, Replicate 2	C10, Replicate 3	C5, Replicate 1	C5, Replicate 2	C5, Replicate 3	C6, Replicate 1	C6, Replicate 2	C6, Replicate 3	C8, Replicate 1	C8, Replicate 2	C8, Replicate 3	C1, Replicate 1	C1, Replicate 2	C1, Replicate 3	C4,Replicate 1	C4,Replicate 2	C4,Replicate 3	H1, Replicate 1	H1, Replicate 2	H1, Replicate 3	H2, Replicate 1	H2, Replicate 2	H2, Replicate 3	H3, Replicate 1	H3, Replicate 2	H3, Replicate 3	H4, Replicate 1	H4, Replicate 2	H4, Replicate 3
High	Master Protein	P04114	Apolipoprotein B-100 OS=Homo sapiens OX=9606 GN=APOB PE=1 SV=2	77	402	22106	402	4563	515,3	7,05	1.588	0.67	0.202028	.	.	.	.	.	.	.	.	.	.	.	.	.	.	.	.	.	.	.	.	.	.	.	.	.	.	.	.	.	.	.	.	.	.	.	.
	Confidence	Annotated Sequence	Modifications	Modifications in Master Proteins	Qvality PEP	Qvality q-value	# PSMs	Master Protein Accessions	Master Protein Descriptions	Positions in Master Proteins	# Missed Cleavages	Theo. MH+ [Da]	# Razor Quan Results	Abundance Ratio: (HDL) / (Control)	Abundance Ratio Adj. P-Value: (HDL) / (Control)	Abundance Ratio Variability [%]: (HDL) / (Control)	Abundances (Grouped): Control	Abundances (Grouped): HDL	Abundances (Grouped) CV [%]: Control	Abundances (Grouped) CV [%]: HDL	Found in Sample: [S2] F2: Sample, C7, Control, Replicate 1	Found in Sample: [S3] F3: Sample, C7, Control, Replicate 2	Found in Sample: [S4] F4: Sample, C7, Control, Replicate 3	Found in Sample: [S5] F5: Sample, C9, Control, Replicate 1	Found in Sample: [S6] F6: Sample, C9, Control, Replicate 2	Found in Sample: [S7] F7: Sample, C9, Control, Replicate 3	Found in Sample: [S8] F8: Sample, C10, Control, Replicate 1	Found in Sample: [S9] F9: Sample, C10, Control, Replicate 2	Found in Sample: [S10] F10: Sample, C10, Control, Replicate 3	Found in Sample: [S20] F20: Sample, C5, Control, Replicate 1	Found in Sample: [S21] F21: Sample, C5, Control, Replicate 2	Found in Sample: [S22] F22: Sample, C5, Control, Replicate 3	Found in Sample: [S23] F23: Sample, C6, Control, Replicate 1	Found in Sample: [S24] F24: Sample, C6, Control, Replicate 2	Found in Sample: [S25] F25: Sample, C6, Control, Replicate 3	Found in Sample: [S26] F26: Sample, C8, Control, Replicate 1	Found in Sample: [S27] F27: Sample, C8, Control, Replicate 2	Found in Sample: [S28] F28: Sample, C8, Control, Replicate 3	Found in Sample: [S38] F38: Sample, C1, Control, Replicate 1	Found in Sample: [S39] F39: Sample, C1, Control, Replicate 2	Found in Sample: [S40] F40: Sample, C1, Control, Replicate 3	Found in Sample: [S41] F41: Sample, C4, Control, Replicate 1	Found in Sample: [S42] F42: Sample, C4, Control, Replicate 2	Found in Sample: [S43] F43: Sample, C4, Control, Replicate 3	Found in Sample: [S11] F11: Sample, H1, HDL, Replicate 1	Found in Sample: [S12] F12: Sample, H1, HDL, Replicate 2	Found in Sample: [S13] F13: Sample, H1, HDL, Replicate 3	Found in Sample: [S14] F14: Sample, H2, HDL, Replicate 1	Found in Sample: [S15] F15: Sample, H2, HDL, Replicate 2
	High	[K].AAIQALRK.[M]			0,130274	0,00437431	22	P04114	Apolipoprotein B-100 OS=Homo sapiens OX=9606 GN=APOB PE=1 SV=2	P04114 [526-533]	1	87055196	0								. Found	.	. Found	. Found	.	.	. Found	. Found	. Found	. Found	.	.	. Found	.	. Found	. Found	. Found	. Found	. Found	. Found	. Found	. Found	. Found	. Found	. Found	. Found	. Found	.	. Found
	High	[K].AALTELSLGSAYQAMILGVDSK.[N]	1xOxidation [M15]		4,79953E-06	0	55	P04114	Apolipoprotein B-100 OS=Homo sapiens OX=9606 GN=APOB PE=1 SV=2	P04114 [1703-1724]	0	225416353	0	1.287	0.999209963067217	117.68	74.4	125.6	159.03	67.67	. Found	. Found	. Found	. Found	. Found	. Found	. Found	. Found	. Found	. Found	.	.	.	.	.	.	.	.	.	.	.	.	.	.	.	.	.	.	.
	High	[K].AALTELSLGSAYQAMILGVDSK.[N]			4,09894E-06	0	72	P04114	Apolipoprotein B-100 OS=Homo sapiens OX=9606 GN=APOB PE=1 SV=2	P04114 [1703-1724]	0	223816861	0	1.991	0.529921435066531	125.91	93.7	106.3	75.25	113.29	.	.	.	.	.	. Found	.	.	.	. Found	.	.	.	.	.	.	.	.	.	.	.	. Found	. Found	. Found	. Found	.	.	.	.
	High	[K].AASGTTGTYQEWK.[D]			0,000898396	0	34	P04114	Apolipoprotein B-100 OS=Homo sapiens OX=9606 GN=APOB PE=1 SV=2	P04114 [4133-4145]	0	139964883	0	2.098	0.500021515833152	116.29	81.2	118.8	76.29	90.08	.	.	.	.	.	.	. Found	. Found	. Found	.	.	.	.	.	.	.	.	.	.	. Found	. Found	. Found	. Found	. Found	.	. Found	.	. Found	.
	High	[K].AASGTTGTYQEWKDK.[A]			0,000295365	0	16	P04114	Apolipoprotein B-100 OS=Homo sapiens OX=9606 GN=APOB PE=1 SV=2	P04114 [4133-4147]	1	164277074	0	2.470	0.360886203111104	55.66	49.0	151.0	58.71	35.94	. Found	. Found	. Found	. Found	. Found	. Found	. Found	. Found	. Found	. Found	.	.	.	.	.	.	.	.	. Found	. Found	. Found	. Found	. Found	. Found	. Found	. Found	. Found	. Found	. Found
	High	[K].AASGTTGTYQEWKDKAQNLYQELLTQEGQASFQGLK.[D]			0,0617667	0,00122162	2	P04114	Apolipoprotein B-100 OS=Homo sapiens OX=9606 GN=APOB PE=1 SV=2	P04114 [4133-4168]	2	398995156	0	2.599	0.283904749511889	88.95	58.8	141.2		67.98	. Found	. Found	. Found	. Found	. Found	. Found	. Found	. Found	. Found	. Found	. Found	. Found	. Found	. Found	.	. Found	. Found	.	. Found	. Found	. Found	. Found	. Found	. Found	. Found	. Found	. Found	. Found	. Found
	High	[K].ADSVVDLLSYNVQGSGETTYDHK.[N]			3,89691E-07	0	86	P04114	Apolipoprotein B-100 OS=Homo sapiens OX=9606 GN=APOB PE=1 SV=2	P04114 [1393-1415]	0	249816815	0	2.168	0.0846351255255837	113.49	60.6	139.4	81.39	92.47	.	.	.	.	.	.	.	.	.	.	.	.	.	.	.	.	.	.	.	.	.	.	.	. Found	.	.	.	. Found	.
	High	[K].ADYVETVLDSTCSSTVQFLEYELNVLGTHK.[I]	1xCarbamidomethyl [C12]		2,52479E-05	0	1	P04114	Apolipoprotein B-100 OS=Homo sapiens OX=9606 GN=APOB PE=1 SV=2	P04114 [3906-3935]	0	341863589	0	100.000	1.18764845605701E-16			200.0		83.04	. Found	. Found	. Found	. Found	. Found	. Found	. Found	. Found	. Found	. Found	. Found	. Found	. Found	. Found	. Found	. Found	. Found	. Found	. Found	. Found	. Found	. Found	. Found	. Found	. Found	. Found	. Found	. Found	. Found
	High	[K].AEFTGRHDAHLNGK.[V]			0,0455193	0,000840285	13	P04114	Apolipoprotein B-100 OS=Homo sapiens OX=9606 GN=APOB PE=1 SV=2	P04114 [3015-3028]	1	155276151	0	1.843	0.695482867056879	127.72	73.8	126.2	111.58	124.53	. Found	. Found	. Found	. Found	. Found	.	. Found	. Found	. Found	. Found	. Found	. Found	. Found	. Found	. Found	. Found	. Found	. Found	. Found	. Found	. Found	. Found	. Found	. Found	. Found	. Found	. Found	. Found	. Found
	High	[K].AEPLAFTFSHDYK.[G]			0,0003873	0	93	P04114	Apolipoprotein B-100 OS=Homo sapiens OX=9606 GN=APOB PE=1 SV=2	P04114 [1935-1947]	0	152573217	0	1.884	0.237286248995207	116.78	70.9	129.1	156.55	106.04	.	.	. Found	.	.	.	. Found	. Found	.	.	.	.	.	.	.	.	.	.	.	.	.	.	.	.	.	.	.	.	.
	High	[K].AEPLAFTFSHDYKGSTSHHLVSR.[K]			1,51064E-06	0	32	P04114	Apolipoprotein B-100 OS=Homo sapiens OX=9606 GN=APOB PE=1 SV=2	P04114 [1935-1957]	1	258726881	0	0.670	0.307960245824	58.19	60.1	139.9	143.59	79.87	. Found	. Found	. Found	. Found	. Found	. Found	. Found	. Found	. Found	. Found	. Found	. Found	.	.	.	. Found	. Found	. Found	. Found	. Found	. Found	. Found	. Found	. Found	. Found	. Found	. Found	. Found	. Found
	High	[K].AGHIAWTSSGK.[G]			0,00189248	0,000313424	23	P04114	Apolipoprotein B-100 OS=Homo sapiens OX=9606 GN=APOB PE=1 SV=2	P04114 [2916-2926]	0	111456398	1	1.007	0.983306306909598	94.20	102.9	97.1	78.97	51.72	. Found	. Found	. Found	. Found	. Found	. Found	. Found	. Found	. Found	.	. Found	. Found	.	.	.	.	.	. Found	.	. Found	. Found	. Found	. Found	. Found	.	.	. Found	. Found	. Found
	High	[K].AGVKLEVANMQAELVAKPSVSVEFVTNMGIIIPDFAR.[S]	2xOxidation [M10; M28]		3,72019E-05	0	3	P04114	Apolipoprotein B-100 OS=Homo sapiens OX=9606 GN=APOB PE=1 SV=2	P04114 [860-896]	1	397609222	0	1.267	0.999850434146449	56.47	81.4	118.6	69.58		. Found	. Found	. Found	. Found	. Found	. Found	. Found	. Found	. Found	. Found	. Found	. Found	. Found	. Found	. Found	. Found	. Found	. Found	. Found	. Found	. Found	.	.	. Found	. Found	. Found	. Found	. Found	.
	High	[K].AGVKLEVANMQAELVAKPSVSVEFVTNMGIIIPDFAR.[S]	1xCarbamyl [K17]; 2xOxidation [M10; M28]	P04114 1xCarbamyl [K876]	0,0365009	0,000840285	2	P04114	Apolipoprotein B-100 OS=Homo sapiens OX=9606 GN=APOB PE=1 SV=2	P04114 [860-896]	1	401909803	0	100.000	1.18764845605701E-16			200.0		45.22	. Found	. Found	. Found	. Found	. Found	. Found	. Found	. Found	. Found	. Found	. Found	. Found	. Found	. Found	. Found	. Found	. Found	. Found	. Found	. Found	. Found	. Found	. Found	. Found	. Found	. Found	. Found	. Found	. Found
	High	[K].AGVKLEVANMQAELVAKPSVSVEFVTNMGIIIPDFAR.[S]	1xOxidation [M]		4,51215E-06	0	18	P04114	Apolipoprotein B-100 OS=Homo sapiens OX=9606 GN=APOB PE=1 SV=2	P04114 [860-896]	1	396009731	0	2.732	0.314419981395632	124.50	58.1	141.9	64.78	103.28	. Found	. Found	. Found	. Found	. Found	. Found	. Found	. Found	. Found	.	. Found	.	.	. Found	.	. Found	. Found	. Found	. Found	. Found	. Found	. Found	. Found	. Found	. Found	. Found	. Found	.	.
	High	[K].AHLDIAGSLEGHLR.[F]			2,562E-06	0	160	P04114	Apolipoprotein B-100 OS=Homo sapiens OX=9606 GN=APOB PE=1 SV=2	P04114 [3657-3670]	0	148879175	0	1.895	0.229678904182427	119.86	88.1	111.9	111.10	103.80	.	.	.	.	.	.	.	.	.	.	.	.	.	.	.	.	.	.	.	.	.	.	.	.	.	.	.	.	.
	High	[K].ALVEQGFTVPEIK.[T]			0,000782769	0	82	P04114	Apolipoprotein B-100 OS=Homo sapiens OX=9606 GN=APOB PE=1 SV=2	P04114 [2579-2591]	0	143078896	0	1.721	0.402831962471908	99.65	70.3	129.7	82.37	71.87	.	.	.	.	.	.	. Found	. Found	. Found	.	.	.	.	.	.	.	.	.	.	.	.	.	.	.	.	.	.	.	.
	High	[K].ALYWVNGQVPDGVSK.[V]			0,000206033	0	67	P04114	Apolipoprotein B-100 OS=Homo sapiens OX=9606 GN=APOB PE=1 SV=2	P04114 [718-732]	0	163283803	0	1.639	0.498877082024319	94.66	85.4	114.6	74.64	100.72	.	.	.	.	.	.	.	.	. Found	.	.	.	.	.	.	.	.	.	.	.	. Found	.	.	.	. Found	. Found	. Found	.	.
	High	[K].AQIPILR.[M]			0,157301	0,00572136	31	P04114	Apolipoprotein B-100 OS=Homo sapiens OX=9606 GN=APOB PE=1 SV=2	P04114 [3431-3437]	0	81051960	0	1.654	0.481277066658822	111.87	85.1	114.9	128.43	99.74	. Found	. Found	.	. Found	.	. Found	. Found	. Found	.	.	.	.	.	.	.	.	.	.	.	.	.	. Found	. Found	.	. Found	. Found	.	. Found	. Found
	High	[K].AQNLYQELLTQEGQASFQGLK.[D]			1,62348E-06	0	7	P04114	Apolipoprotein B-100 OS=Homo sapiens OX=9606 GN=APOB PE=1 SV=2	P04114 [4148-4168]	0	236619866	0	1.246	0.999209963067217	106.74	126.0	74.0	49.07	104.68	. Found	. Found	. Found	. Found	. Found	. Found	. Found	. Found	. Found	. Found	. Found	. Found	.	. Found	. Found	. Found	. Found	. Found	. Found	. Found	. Found	. Found	. Found	. Found	. Found	. Found	. Found	. Found	. Found
	High	[K].AQNLYQELLTQEGQASFQGLKDNVFDGLVR.[V]			1,07937E-06	0	35	P04114	Apolipoprotein B-100 OS=Homo sapiens OX=9606 GN=APOB PE=1 SV=2	P04114 [4148-4177]	1	338170736	0	2.458	0.209978644780799	123.14	34.6	165.4	137.77	87.08	.	.	.	. Found	.	.	. Found	. Found	. Found	. Found	. Found	.	.	.	.	.	. Found	. Found	. Found	. Found	. Found	. Found	.	. Found	.	. Found	.	. Found	. Found
	High	[K].ASGSLPYTQTLQDHLNSLK.[E]			0,000209598	0	27	P04114	Apolipoprotein B-100 OS=Homo sapiens OX=9606 GN=APOB PE=1 SV=2	P04114 [1241-1259]	0	207306111	0	1.826	0.749543659872939	108.93	72.8	127.2	82.76	83.55	. Found	. Found	. Found	. Found	. Found	. Found	. Found	. Found	. Found	. Found	.	. Found	.	.	.	. Found	.	.	.	.	.	. Found	. Found	.	.	.	.	. Found	. Found
	High	[K].ASGSLPYTQTLQDHLNSLKEFNLQNMGLPDFHIPENLFLK.[S]			0,00583842	0,000591694	18	P04114	Apolipoprotein B-100 OS=Homo sapiens OX=9606 GN=APOB PE=1 SV=2	P04114 [1241-1280]	1	457030751	0	5.076	0.000618491948525369	131.06	13.9	186.1	124.65	89.99	. Found	. Found	. Found	. Found	. Found	. Found	. Found	. Found	. Found	. Found	. Found	. Found	. Found	. Found	. Found	. Found	.	.	. Found	. Found	. Found	. Found	. Found	. Found	. Found	. Found	. Found	. Found	. Found
	High	[K].ASGSLPYTQTLQDHLNSLKEFNLQNMGLPDFHIPENLFLK.[S]	1xOxidation [M26]		0,00391719	0,000313424	20	P04114	Apolipoprotein B-100 OS=Homo sapiens OX=9606 GN=APOB PE=1 SV=2	P04114 [1241-1280]	1	458630242	0	2.718	0.146642816741373	133.39	130.2	69.8	13.61	142.38	. Found	. Found	. Found	. Found	. Found	. Found	. Found	. Found	. Found	. Found	. Found	. Found	.	.	.	.	.	.	. Found	. Found	. Found	. Found	. Found	. Found	. Found	. Found	. Found	. Found	. Found
	High	[K].ATFQTPDFIVPLTDLR.[I]			0,000472554	0	143	P04114	Apolipoprotein B-100 OS=Homo sapiens OX=9606 GN=APOB PE=1 SV=2	P04114 [2610-2625]	0	183397453	0	1.454	0.750708849082502	104.70	83.5	116.5	75.43	76.21	.	.	.	.	.	.	.	.	. Found	.	.	.	.	.	.	.	.	.	.	.	.	.	.	.	.	.	.	.	.
	High	[K].ATFQTPDFIVPLTDLRIPSVQINFK.[D]			0,0357268	0,000840285	5	P04114	Apolipoprotein B-100 OS=Homo sapiens OX=9606 GN=APOB PE=1 SV=2	P04114 [2610-2634]	1	286056074	0	100.000	1.18764845605701E-16			200.0		66.80	. Found	. Found	. Found	. Found	. Found	. Found	. Found	. Found	. Found	. Found	. Found	. Found	. Found	. Found	. Found	. Found	. Found	. Found	. Found	. Found	. Found	. Found	. Found	. Found	. Found	. Found	. Found	. Found	. Found
	High	[K].ATGVLYDYVNK.[Y]			0,00660891	0,000591694	65	P04114	Apolipoprotein B-100 OS=Homo sapiens OX=9606 GN=APOB PE=1 SV=2	P04114 [4077-4087]	0	124263648	0	1.623	0.517803009736241	114.50	91.7	108.3	88.43	104.94	.	. Found	.	.	.	.	.	.	.	.	.	.	.	.	.	.	.	.	.	. Found	.	.	.	.	.	.	.	.	.
	High	[K].ATGVLYDYVNKYHWEHTGLTLR.[E]			6,92787E-06	0	54	P04114	Apolipoprotein B-100 OS=Homo sapiens OX=9606 GN=APOB PE=1 SV=2	P04114 [4077-4098]	1	263632560	0	1.456	0.909586583765699	106.23	93.3	106.7	65.71	72.99	.	.	.	.	.	.	. Found	. Found	. Found	.	. Found	. Found	.	.	.	.	.	.	.	. Found	.	. Found	. Found	. Found	.	. Found	.	.	.
	High	[K].ATLELSPWQMSALVQVHASQPSSFHDFPDLGQEVALNANTK.[N]			2,67883E-06	0	16	P04114	Apolipoprotein B-100 OS=Homo sapiens OX=9606 GN=APOB PE=1 SV=2	P04114 [3587-3627]	0	446419287	0	2.772	0.132922769562205	109.99	62.6	137.4	66.75	95.64	.	. Found	.	.	. Found	. Found	. Found	. Found	. Found	. Found	.	. Found	. Found	.	.	. Found	. Found	. Found	. Found	. Found	. Found	. Found	. Found	. Found	. Found	. Found	. Found	. Found	.
	High	[K].ATLELSPWQMSALVQVHASQPSSFHDFPDLGQEVALNANTK.[N]	1xOxidation [M10]		0,000318517	0	9	P04114	Apolipoprotein B-100 OS=Homo sapiens OX=9606 GN=APOB PE=1 SV=2	P04114 [3587-3627]	0	448018779	0	0.643	0.333791228338727	36.10	55.0	145.0	111.42	31.35	. Found	. Found	. Found	. Found	. Found	. Found	. Found	. Found	. Found	. Found	. Found	. Found	. Found	.	. Found	.	. Found	. Found	. Found	. Found	.	. Found	.	. Found	. Found	. Found	. Found	.	. Found
	High	[K].ATVAVYLESLQDTK.[I]			0,000506111	0	9	P04114	Apolipoprotein B-100 OS=Homo sapiens OX=9606 GN=APOB PE=1 SV=2	P04114 [2475-2488]	0	153781081	0	1.316	0.964369058686853	102.19	96.9	103.1	73.75	73.58	. Found	. Found	. Found	. Found	. Found	. Found	. Found	. Found	. Found	. Found	. Found	. Found	.	.	. Found	. Found	. Found	. Found	. Found	. Found	. Found	. Found	. Found	. Found	. Found	. Found	. Found	. Found	. Found
	High	[K].AVSMPSFSILGSDVR.[V]			0,000420533	0	95	P04114	Apolipoprotein B-100 OS=Homo sapiens OX=9606 GN=APOB PE=1 SV=2	P04114 [3277-3291]	0	156579920	0	1.505	0.678746436355452	135.78	72.3	127.7	93.10	113.14	.	.	.	.	.	.	.	.	.	.	.	.	.	.	.	.	.	.	.	.	.	. Found	. Found	. Found	.	.	.	.	.
	High	[K].AVSMPSFSILGSDVR.[V]	1xOxidation [M4]		0,000542052	0	175	P04114	Apolipoprotein B-100 OS=Homo sapiens OX=9606 GN=APOB PE=1 SV=2	P04114 [3277-3291]	0	158179412	0	1.333	0.884322188652115	136.44	70.5	129.5	167.65	82.34	. Found	.	.	.	.	. Found	. Found	. Found	. Found	.	.	.	.	.	.	.	.	.	.	.	.	.	.	.	.	.	.	.	.
	High	[K].AVSMPSFSILGSDVRVPSYTLILPSLELPVLHVPR.[N]			0,00194663	0,000313424	4	P04114	Apolipoprotein B-100 OS=Homo sapiens OX=9606 GN=APOB PE=1 SV=2	P04114 [3277-3311]	1	379009756	0	5.395	0.00590738471929945	39.78	29.5	170.5		22.89	. Found	. Found	. Found	. Found	. Found	. Found	. Found	. Found	. Found	. Found	. Found	. Found	. Found	. Found	. Found	. Found	. Found	. Found	. Found	. Found	. Found	. Found	. Found	. Found	. Found	. Found	. Found	. Found	. Found
	High	[K].AVSMPSFSILGSDVRVPSYTLILPSLELPVLHVPR.[N]	1xOxidation [M4]		0,113949	0,00369184	2	P04114	Apolipoprotein B-100 OS=Homo sapiens OX=9606 GN=APOB PE=1 SV=2	P04114 [3277-3311]	1	380609248	0	100.000	1.18764845605701E-16			200.0		4.31	. Found	. Found	. Found	. Found	. Found	. Found	. Found	. Found	. Found	. Found	. Found	. Found	. Found	. Found	. Found	. Found	. Found	. Found	. Found	. Found	. Found	. Found	. Found	. Found	. Found	. Found	. Found	.	. Found
	High	[K].CSLLVLENELNAELGLSGASMK.[L]	1xCarbamidomethyl [C1]; 1xOxidation [M21]		0,000189101	0	25	P04114	Apolipoprotein B-100 OS=Homo sapiens OX=9606 GN=APOB PE=1 SV=2	P04114 [1662-1683]	0	236417852	0	3.068	0.158840395481248	126.12	61.4	138.6	131.81	92.52	. Found	. Found	. Found	. Found	. Found	. Found	. Found	. Found	. Found	. Found	. Found	. Found	.	.	.	. Found	. Found	. Found	. Found	.	.	.	.	.	.	.	. Found	. Found	. Found
	High	[K].CSLLVLENELNAELGLSGASMK.[L]	1xCarbamidomethyl [C1]		9,09248E-07	0	68	P04114	Apolipoprotein B-100 OS=Homo sapiens OX=9606 GN=APOB PE=1 SV=2	P04114 [1662-1683]	0	234818361	0	2.242	0.49404780478808	137.75	101.9	98.1	84.72	116.19	.	.	.	.	.	.	.	.	.	.	.	.	.	.	.	.	. Found	.	. Found	. Found	. Found	. Found	. Found	. Found	. Found	. Found	.	.	.
	High	[K].CVQSTKPSLMIQK.[A]	1xCarbamidomethyl [C1]		0,000152873	0	68	P04114	Apolipoprotein B-100 OS=Homo sapiens OX=9606 GN=APOB PE=1 SV=2	P04114 [513-525]	0	151979710	0	1.106	0.999209963067217	106.23	106.6	93.4	72.17	103.85	.	.	.	.	.	.	.	.	.	.	.	.	.	.	.	.	.	.	.	.	.	.	.	.	.	.	.	.	.
	High	[K].CVQSTKPSLMIQK.[A]	1xCarbamidomethyl [C1]; 1xOxidation [M10]		0,000818588	0	58	P04114	Apolipoprotein B-100 OS=Homo sapiens OX=9606 GN=APOB PE=1 SV=2	P04114 [513-525]	0	153579201	0	1.015	0.92520524963809	113.22	110.4	89.6	104.82	69.86	.	. Found	. Found	. Found	. Found	. Found	. Found	. Found	. Found	.	.	.	.	.	.	.	.	.	.	.	.	.	.	.	.	. Found	. Found	.	.
	High	[K].DDKHEQDMVNGIMLSVEK.[L]	2xOxidation [M8; M13]		0,000383335	0	50	P04114	Apolipoprotein B-100 OS=Homo sapiens OX=9606 GN=APOB PE=1 SV=2	P04114 [743-760]	1	211996345	0	0.847	0.724042827159644	70.79	98.3	101.7	107.58	46.32	. Found	. Found	. Found	. Found	. Found	. Found	. Found	. Found	. Found	. Found	. Found	. Found	.	.	.	.	.	.	.	.	.	.	.	.	. Found	.	.	.	.
	High	[K].DDKHEQDMVNGIMLSVEK.[L]	1xOxidation [M]		0,000222947	0	32	P04114	Apolipoprotein B-100 OS=Homo sapiens OX=9606 GN=APOB PE=1 SV=2	P04114 [743-760]	1	210396853	0	0.808	0.905489059685449	77.87	137.0	63.0	86.75	125.36	. Found	. Found	. Found	. Found	. Found	. Found	. Found	. Found	. Found	.	.	.	.	. Found	. Found	.	.	.	. Found	. Found	. Found	. Found	. Found	. Found	. Found	. Found	. Found	. Found	. Found
	High	[K].DDKHEQDMVNGIMLSVEK.[L]			0,00011901	0	16	P04114	Apolipoprotein B-100 OS=Homo sapiens OX=9606 GN=APOB PE=1 SV=2	P04114 [743-760]	1	208797362	0	1.414	0.965273814243824	92.88	83.0	117.0	66.60	70.91	. Found	. Found	. Found	. Found	. Found	. Found	. Found	. Found	. Found	.	.	.	. Found	. Found	. Found	.	.	.	. Found	. Found	. Found	. Found	. Found	. Found	. Found	. Found	. Found	. Found	. Found
	High	[K].DEPTYILNIK.[R]			0,0614907	0,00122162	1	P04114	Apolipoprotein B-100 OS=Homo sapiens OX=9606 GN=APOB PE=1 SV=2	P04114 [148-157]	0	120564123	0								. Found	. Found	. Found	. Found	. Found	. Found	. Found	. Found	. Found	. Found	. Found	. Found	. Found	. Found	. Found	. Found	. Found	. Found	. Found	. Found	. Found	. Found	. Found	. Found	. Found	. Found	. Found	. Found	. Found
	High	[K].DKAQNLYQELLTQEGQASFQGLK.[D]			1,99267E-05	0	26	P04114	Apolipoprotein B-100 OS=Homo sapiens OX=9606 GN=APOB PE=1 SV=2	P04114 [4146-4168]	1	260932057	0	2.528	0.421682281844197	104.03	46.5	153.5	99.76	76.75	.	.	.	.	.	.	. Found	. Found	. Found	.	. Found	.	.	.	.	.	.	.	. Found	. Found	. Found	. Found	. Found	. Found	.	.	.	. Found	. Found
	High	[K].DKAQNLYQELLTQEGQASFQGLKDNVFDGLVR.[V]			3,62607E-07	0	41	P04114	Apolipoprotein B-100 OS=Homo sapiens OX=9606 GN=APOB PE=1 SV=2	P04114 [4146-4177]	2	362482926	0	1.578	0.899383795412971	106.91	81.1	118.9	63.83	100.46	.	.	.	.	.	.	. Found	. Found	. Found	.	.	.	.	.	.	.	.	.	. Found	. Found	. Found	. Found	. Found	. Found	.	.	.	.	.
	High	[K].DKDQEVLLQTFLDDASPGDK.[R]			0,000295365	0	32	P04114	Apolipoprotein B-100 OS=Homo sapiens OX=9606 GN=APOB PE=1 SV=2	P04114 [538-557]	1	223408230	0	1.840	0.766627890270153	103.32	82.4	117.6	69.32	97.88	.	. Found	. Found	. Found	.	.	. Found	. Found	. Found	.	. Found	.	.	. Found	. Found	.	.	.	. Found	. Found	. Found	. Found	.	. Found	.	.	. Found	.	.
	High	[K].DKDQEVLLQTFLDDASPGDKR.[L]			9,92463E-09	0	149	P04114	Apolipoprotein B-100 OS=Homo sapiens OX=9606 GN=APOB PE=1 SV=2	P04114 [538-558]	2	239018341	0	1.604	0.543951146963168	103.31	79.9	120.1	74.27	86.37	.	.	.	.	.	.	.	.	.	.	.	.	.	.	.	.	.	.	.	.	.	.	.	.	.	.	.	.	.
	High	[K].DKIGVELTGR.[T]			0,0277029	0,000840285	86	P04114	Apolipoprotein B-100 OS=Homo sapiens OX=9606 GN=APOB PE=1 SV=2	P04114 [2003-2012]	1	108761060	0	1.587	0.568169185776893	113.23	94.5	105.5	99.73	77.65	.	.	.	.	.	.	. Found	. Found	. Found	.	.	.	.	.	.	.	.	.	.	.	.	.	.	. Found	.	.	.	.	.
	High	[K].DLSKEAQEVFK.[A]			0,00432431	0,000313424	8	P04114	Apolipoprotein B-100 OS=Homo sapiens OX=9606 GN=APOB PE=1 SV=2	P04114 [4275-4285]	1	129366851	0	1.584	0.832614190997697	130.92	49.7	150.3	151.39	116.26	. Found	. Found	. Found	. Found	. Found	. Found	. Found	. Found	. Found	. Found	. Found	. Found	.	.	.	. Found	. Found	. Found	. Found	. Found	. Found	. Found	. Found	. Found	. Found	. Found	.	. Found	. Found
	High	[K].DNVFDGLVR.[V]			0,0391022	0,000840285	35	P04114	Apolipoprotein B-100 OS=Homo sapiens OX=9606 GN=APOB PE=1 SV=2	P04114 [4169-4177]	0	103452653	0	1.567	0.909863605903733	111.49	73.7	126.3	131.37	111.33	.	.	.	. Found	. Found	. Found	. Found	. Found	. Found	.	.	.	.	.	.	.	.	.	.	.	.	. Found	. Found	. Found	.	.	.	. Found	. Found
	High	[K].EALKESQLPTVMDFR.[K]			0,000128338	0	58	P04114	Apolipoprotein B-100 OS=Homo sapiens OX=9606 GN=APOB PE=1 SV=2	P04114 [617-631]	1	176389965	0	1.136	0.977134742088879	115.04	112.1	87.9	88.82	126.16	.	.	.	.	. Found	. Found	. Found	. Found	. Found	.	.	.	.	.	.	.	.	.	. Found	. Found	. Found	.	.	.	.	.	.	.	.
	High	[K].EALKESQLPTVMDFR.[K]	1xOxidation [M12]		0,001866	0,000313424	23	P04114	Apolipoprotein B-100 OS=Homo sapiens OX=9606 GN=APOB PE=1 SV=2	P04114 [617-631]	1	177989456	0	0.680	0.730706129623868	52.99	105.8	94.2	109.60	72.56	. Found	. Found	. Found	. Found	. Found	. Found	. Found	. Found	. Found	. Found	. Found	. Found	.	.	.	.	. Found	.	. Found	. Found	. Found	.	.	.	. Found	. Found	. Found	.	.
	High	[K].EALKESQLPTVMDFRK.[F]			0,00118886	0	60	P04114	Apolipoprotein B-100 OS=Homo sapiens OX=9606 GN=APOB PE=1 SV=2	P04114 [617-632]	2	189199461	0	1.485	0.957248470194355	114.04	82.7	117.3	83.21	114.20	.	.	.	.	.	.	.	.	.	.	.	.	.	.	.	.	.	.	. Found	. Found	. Found	.	.	.	.	.	.	.	.
	High	[K].EALKESQLPTVMDFRK.[F]	1xOxidation [M12]		0,00293161	0,000313424	12	P04114	Apolipoprotein B-100 OS=Homo sapiens OX=9606 GN=APOB PE=1 SV=2	P04114 [617-632]	2	190798952	0	0.975	0.983306306909598	115.73	79.2	120.8	126.97	91.42	. Found	. Found	. Found	. Found	. Found	. Found	. Found	. Found	. Found	. Found	. Found	. Found	.	.	.	. Found	. Found	. Found	. Found	. Found	. Found	.	.	.	. Found	. Found	. Found	. Found	.
	High	[K].EAQEVFK.[A]			0,228787	0,00782232	12	P04114	Apolipoprotein B-100 OS=Homo sapiens OX=9606 GN=APOB PE=1 SV=2	P04114 [4279-4285]	0	85043051	0	1.380	0.977134742088879	91.40	82.4	117.6	86.33	86.80	. Found	. Found	. Found	. Found	. Found	. Found	. Found	. Found	. Found	. Found	. Found	. Found	. Found	. Found	. Found	.	.	.	. Found	. Found	. Found	. Found	. Found	. Found	. Found	. Found	. Found	. Found	. Found
	High	[K].EFNLQNMGLPDFHIPENLFLK.[S]	1xOxidation [M7]		0,000175959	0	9	P04114	Apolipoprotein B-100 OS=Homo sapiens OX=9606 GN=APOB PE=1 SV=2	P04114 [1260-1280]	0	253225916	0	2.864	0.236095141937018	120.25	40.5	159.5	156.33	74.20	. Found	. Found	. Found	. Found	. Found	. Found	. Found	. Found	. Found	. Found	. Found	. Found	.	.	.	. Found	. Found	. Found	. Found	. Found	. Found	. Found	. Found	. Found	. Found	. Found	. Found	. Found	. Found
	High	[K].EKIAELSATAQEIIK.[S]			7,78485E-06	0	49	P04114	Apolipoprotein B-100 OS=Homo sapiens OX=9606 GN=APOB PE=1 SV=2	P04114 [4464-4478]	1	164392143	0	2.027	0.655089666219113	110.47	82.8	117.2	110.16	89.86	.	.	.	. Found	.	. Found	. Found	. Found	. Found	.	. Found	. Found	.	.	.	.	.	.	.	.	.	. Found	. Found	. Found	.	. Found	.	.	. Found
	High	[K].EKLTALTK.[K]			0,0888345	0,00268565	50	P04114	Apolipoprotein B-100 OS=Homo sapiens OX=9606 GN=APOB PE=1 SV=2	P04114 [2140-2147]	1	90355096	0	1.123	0.998019339144021	105.85	108.1	91.9	76.20	97.95	.	.	.	.	.	.	. Found	. Found	. Found	.	.	.	.	.	.	.	.	.	.	.	.	.	.	.	.	.	.	.	.
	High	[K].EKLTALTKK.[Y]			0,0896548	0,00268565	26	P04114	Apolipoprotein B-100 OS=Homo sapiens OX=9606 GN=APOB PE=1 SV=2	P04114 [2140-2148]	2	103164592	0	1.048	0.95508712871475	128.97	108.7	91.3	77.45	103.44	. Found	.	.	.	.	.	. Found	. Found	. Found	. Found	.	.	. Found	. Found	.	. Found	. Found	.	. Found	.	.	.	.	.	. Found	. Found	. Found	. Found	. Found
	High	[K].ENFAGEATLQR.[I]			0,00691537	0,000591694	50	P04114	Apolipoprotein B-100 OS=Homo sapiens OX=9606 GN=APOB PE=1 SV=2	P04114 [3548-3558]	0	123560149	1	1.620	0.750708849082502	117.33	60.2	139.8	111.28	109.14	.	.	.	.	.	.	. Found	. Found	. Found	. Found	.	.	.	.	.	. Found	.	.	.	.	.	.	.	.	.	.	.	.	.
	High	[K].EQHLFLPFSYK.[N]			0,003061	0,000313424	137	P04114	Apolipoprotein B-100 OS=Homo sapiens OX=9606 GN=APOB PE=1 SV=2	P04114 [263-273]	0	140872596	0	1.513	0.67015505266137	110.81	82.9	117.1	67.18	99.57	.	.	.	.	.	.	.	.	.	.	.	.	.	.	.	.	.	.	.	.	.	.	.	.	.	.	.	.	.
	High	[K].ESQLPTVMDFR.[K]			0,00731993	0,000591694	40	P04114	Apolipoprotein B-100 OS=Homo sapiens OX=9606 GN=APOB PE=1 SV=2	P04114 [621-631]	0	132264091	0	1.019	0.955257224075308	112.24	133.2	66.8	63.57	137.73	.	.	.	. Found	.	.	. Found	. Found	. Found	.	.	. Found	.	.	.	.	.	.	.	.	.	. Found	. Found	. Found	.	. Found	. Found	.	.
	High	[K].ESQLPTVMDFRK.[F]	1xOxidation [M8]		0,00324293	0,000313424	43	P04114	Apolipoprotein B-100 OS=Homo sapiens OX=9606 GN=APOB PE=1 SV=2	P04114 [621-632]	1	146673079	0	1.457	0.965273814243824	132.67	56.3	143.7	141.84	82.85	. Found	. Found	. Found	. Found	. Found	. Found	. Found	. Found	. Found	. Found	. Found	. Found	.	.	.	. Found	. Found	. Found	.	.	.	.	.	.	.	.	.	.	.
	High	[K].ESQLPTVMDFRK.[F]			0,00146497	0	74	P04114	Apolipoprotein B-100 OS=Homo sapiens OX=9606 GN=APOB PE=1 SV=2	P04114 [621-632]	1	145073588	1	1.493	0.956084375177942	128.76	99.1	100.9	83.25	129.45	.	.	.	.	.	.	.	.	. Found	.	.	.	.	.	.	.	.	.	.	.	.	. Found	. Found	. Found	.	.	.	.	.
	High	[K].EVYGFNPEGK.[A]			0,0325256	0,000840285	42	P04114	Apolipoprotein B-100 OS=Homo sapiens OX=9606 GN=APOB PE=1 SV=2	P04114 [101-110]	0	113953677	0	1.537	0.641968333859988	106.57	84.8	115.2	68.46	92.44	.	.	.	.	.	.	. Found	. Found	.	.	.	.	.	.	. Found	.	.	.	.	.	.	.	.	.	.	.	.	.	.
	High	[K].FDHTNSLNIAGLSLDFSSK.[L]			1,12859E-06	0	57	P04114	Apolipoprotein B-100 OS=Homo sapiens OX=9606 GN=APOB PE=1 SV=2	P04114 [1751-1769]	0	206601891	0	2.322	0.366562754603209	115.24	72.9	127.1	97.35	102.44	.	.	.	.	.	.	. Found	. Found	. Found	.	.	.	.	.	.	.	.	.	.	.	.	.	.	.	.	.	.	. Found	. Found
	High	[K].FDHTNSLNIAGLSLDFSSKLDNIYSSDKFYK.[Q]			0,000604957	0	9	P04114	Apolipoprotein B-100 OS=Homo sapiens OX=9606 GN=APOB PE=1 SV=2	P04114 [1751-1781]	2	353973290	0	1.444	0.949211453145072	89.26	86.2	113.8	39.97	80.66	. Found	. Found	. Found	. Found	. Found	. Found	. Found	. Found	. Found	. Found	. Found	. Found	. Found	.	. Found	.	. Found	.	. Found	. Found	. Found	. Found	. Found	. Found	. Found	. Found	. Found	. Found	. Found
	High	[K].FIIPGLK.[L]			0,067884	0,00158954	73	P04114	Apolipoprotein B-100 OS=Homo sapiens OX=9606 GN=APOB PE=1 SV=2	P04114 [3730-3736]	0	78750764	0	1.541	0.681434473372402	119.48	90.1	109.9	82.96	114.49	.	.	.	.	.	.	.	.	. Found	.	.	.	.	.	.	.	.	.	.	.	.	.	.	.	.	.	.	.	.
	High	[K].FIIPSPK.[R]			0,0700664	0,00158954	106	P04114	Apolipoprotein B-100 OS=Homo sapiens OX=9606 GN=APOB PE=1 SV=2	P04114 [924-930]	0	80148690	0	1.493	0.695482867056879	104.44	89.1	110.9	73.05	111.27	.	.	.	.	.	.	. Found	. Found	.	.	.	.	.	.	.	.	.	.	.	.	.	.	.	.	.	.	.	.	.
	High	[K].FLDSNIK.[F]			0,189574	0,00643402	50	P04114	Apolipoprotein B-100 OS=Homo sapiens OX=9606 GN=APOB PE=1 SV=2	P04114 [1430-1436]	0	83645124	0	1.493	0.695482867056879	106.68	90.7	109.3	92.34	88.52	.	.	.	.	.	.	.	.	.	.	.	.	.	.	.	.	.	.	. Found	.	.	.	.	.	.	.	.	.	.
	High	[K].FLDSNIKFSHVEK.[L]			0,00882756	0,000750615	12	P04114	Apolipoprotein B-100 OS=Homo sapiens OX=9606 GN=APOB PE=1 SV=2	P04114 [1430-1442]	1	156381657	0	4.593	0.0247085425512459	96.70	30.1	169.9	77.85	64.13	. Found	. Found	. Found	. Found	. Found	. Found	. Found	. Found	. Found	. Found	. Found	. Found	. Found	. Found	. Found	. Found	. Found	. Found	. Found	. Found	. Found	. Found	. Found	. Found	. Found	. Found	. Found	. Found	. Found
	High	[K].FPEVDVLTK.[Y]			0,00811322	0,000750615	42	P04114	Apolipoprotein B-100 OS=Homo sapiens OX=9606 GN=APOB PE=1 SV=2	P04114 [3791-3799]	0	104757209	0	1.560	0.608953750070001	115.87	80.2	119.8	97.90	106.29	.	.	. Found	. Found	.	. Found	. Found	. Found	. Found	. Found	.	.	.	.	.	.	.	. Found	.	.	.	.	. Found	. Found	.	. Found	.	. Found	.
	High	[K].FRETLEDTR.[D]			0,00849485	0,000750615	62	P04114	Apolipoprotein B-100 OS=Homo sapiens OX=9606 GN=APOB PE=1 SV=2	P04114 [2512-2520]	1	116658003	0	1.258	0.9500492592737	96.15	88.0	112.0	76.11	74.56	.	.	.	.	.	.	. Found	.	. Found	.	.	.	.	.	.	.	.	.	.	.	.	.	.	.	.	.	.	.	.
	High	[K].FRETLEDTRDR.[M]			0,0158528	0,000750615	52	P04114	Apolipoprotein B-100 OS=Homo sapiens OX=9606 GN=APOB PE=1 SV=2	P04114 [2512-2522]	2	143770808	0	1.114	0.998019339144021	88.44	102.0	98.0	58.24	87.24	.	.	.	. Found	.	. Found	. Found	. Found	. Found	. Found	.	.	.	.	.	.	.	.	.	.	.	. Found	. Found	.	.	. Found	.	.	.
	High	[K].FSVPAGIVIPSFQALTAR.[F]			0,000113041	0	160	P04114	Apolipoprotein B-100 OS=Homo sapiens OX=9606 GN=APOB PE=1 SV=2	P04114 [3869-3886]	0	187405344	0	1.619	0.525385531779042	113.36	93.4	106.6	75.20	100.91	.	.	.	.	.	.	.	.	.	.	.	.	.	.	.	.	.	.	.	.	.	.	.	.	.	.	.	.	.
	High	[K].FVTQAEGAK.[Q]			0,0455193	0,000840285	22	P04114	Apolipoprotein B-100 OS=Homo sapiens OX=9606 GN=APOB PE=1 SV=2	P04114 [1035-1043]	0	95049417	0	1.184	0.977134742088879	98.87	109.9	90.1	55.46	88.76	.	. Found	.	. Found	. Found	. Found	. Found	. Found	. Found	.	.	. Found	.	.	.	. Found	.	. Found	.	. Found	.	. Found	. Found	. Found	. Found	. Found	. Found	. Found	. Found
	High	[K].GAVDHKLSLESLTSYFSIESSTK.[G]			0,000933141	0	25	P04114	Apolipoprotein B-100 OS=Homo sapiens OX=9606 GN=APOB PE=1 SV=2	P04114 [3475-3497]	1	249926132	0	2.647	0.368597025391354	78.55	56.2	143.8	38.28	66.45	.	.	. Found	.	.	.	. Found	. Found	. Found	.	.	.	.	.	.	. Found	.	.	. Found	. Found	. Found	. Found	. Found	. Found	. Found	. Found	. Found	. Found	. Found
	High	[K].GAVDHKLSLESLTSYFSIESSTKGDVK.[G]			1,42148E-07	0	52	P04114	Apolipoprotein B-100 OS=Homo sapiens OX=9606 GN=APOB PE=1 SV=2	P04114 [3475-3501]	2	289847311	0	2.110	0.480144878426764	123.09	72.0	128.0	86.30	86.11	.	. Found	.	.	.	.	.	. Found	. Found	.	.	.	.	.	.	.	.	.	. Found	. Found	. Found	. Found	. Found	. Found	. Found	. Found	. Found	.	.
	High	[K].GAYQNNEIK.[H]			0,0743233	0,00176323	36	P04114	Apolipoprotein B-100 OS=Homo sapiens OX=9606 GN=APOB PE=1 SV=2	P04114 [1829-1837]	0	103650580	0	1.721	0.796121760546593	113.43	66.7	133.3	77.63	100.49	. Found	.	.	.	.	.	. Found	. Found	. Found	. Found	.	.	.	.	.	.	.	.	. Found	.	. Found	. Found	.	.	.	.	.	. Found	. Found
	High	[K].GAYQNNEIKHIYAISSAALSASYK.[A]			5,39324E-06	0	60	P04114	Apolipoprotein B-100 OS=Homo sapiens OX=9606 GN=APOB PE=1 SV=2	P04114 [1829-1852]	1	259931509	0	1.668	0.870013900485371	115.53	82.8	117.2	94.19	100.10	.	.	. Found	.	.	.	. Found	. Found	. Found	.	.	.	.	.	.	.	.	.	. Found	.	.	.	. Found	.	.	.	.	. Found	. Found
	High	[K].GAYQNNEIKHIYAISSAALSASYKADTVAK.[V]			0,000100943	0	30	P04114	Apolipoprotein B-100 OS=Homo sapiens OX=9606 GN=APOB PE=1 SV=2	P04114 [1829-1858]	2	318462732	0	2.936	0.101380510036723	85.22	44.9	155.1	59.75	61.01	.	. Found	. Found	.	.	. Found	. Found	. Found	. Found	. Found	.	.	.	.	.	.	.	.	. Found	.	. Found	.	.	.	. Found	. Found	. Found	.	.
	High	[K].GESKLEVLNFDFQANAQLSNPK.[I]			2,60632E-06	0	55	P04114	Apolipoprotein B-100 OS=Homo sapiens OX=9606 GN=APOB PE=1 SV=2	P04114 [2797-2818]	1	244923578	0	2.316	0.207472322178971	113.55	70.1	129.9	107.81	85.57	.	.	.	.	.	.	. Found	. Found	. Found	.	.	.	.	.	.	.	.	.	.	. Found	. Found	. Found	.	. Found	.	. Found	. Found	.	. Found
	High	[K].GFEPTLEALFGK.[Q]			0,00196735	0,000313424	165	P04114	Apolipoprotein B-100 OS=Homo sapiens OX=9606 GN=APOB PE=1 SV=2	P04114 [696-707]	0	130868343	0	1.434	0.775992699821823	102.70	92.1	107.9	69.67	95.23	.	.	.	.	.	.	.	.	.	.	.	.	.	.	.	.	.	.	.	.	.	.	.	.	.	.	.	.	.
	High	[K].GISTSAASPAVGTVGMDMDEDDDFSK.[W]			0,00592649	0,000591694	1	P04114	Apolipoprotein B-100 OS=Homo sapiens OX=9606 GN=APOB PE=1 SV=2	P04114 [3996-4021]	0	260311235	0								. Found	. Found	. Found	. Found	. Found	. Found	. Found	. Found	. Found	. Found	. Found	. Found	. Found	. Found	. Found	. Found	. Found	. Found	. Found	. Found	. Found	. Found	. Found	. Found	. Found	. Found	. Found	. Found	. Found
	High	[K].GISTSAASPAVGTVGMDMDEDDDFSK.[W]	1xOxidation [M]		0,00111307	0	13	P04114	Apolipoprotein B-100 OS=Homo sapiens OX=9606 GN=APOB PE=1 SV=2	P04114 [3996-4021]	0	261910727	0	2.910	0.201555048911615	54.06	45.8	154.2	36.79	39.85	. Found	. Found	. Found	. Found	. Found	. Found	. Found	. Found	. Found	. Found	. Found	.	. Found	. Found	.	. Found	.	. Found	. Found	. Found	. Found	. Found	. Found	. Found	. Found	. Found	. Found	. Found	. Found
	High	[K].GISTSAASPAVGTVGMDMDEDDDFSK.[W]	2xOxidation [M16; M18]		0,000151828	0	3	P04114	Apolipoprotein B-100 OS=Homo sapiens OX=9606 GN=APOB PE=1 SV=2	P04114 [3996-4021]	0	263510218	0	0.318	0.0394864274610566	5.43	151.8	48.2			. Found	. Found	. Found	. Found	. Found	. Found	. Found	. Found	. Found	. Found	. Found	. Found	.	.	.	. Found	. Found	. Found	. Found	. Found	. Found	. Found	. Found	. Found	. Found	. Found	. Found	. Found	. Found
	High	[K].GISTSAASPAVGTVGMDMDEDDDFSKWNFYYSPQSSPDK.[K]	1xCarbamyl [K26]; 1xOxidation [M]	P04114 1xCarbamyl [K4021]	0,084075	0,00250817	6	P04114	Apolipoprotein B-100 OS=Homo sapiens OX=9606 GN=APOB PE=1 SV=2	P04114 [3996-4034]	1	426181249	0	2.597	0.34605286112424	39.51	53.2	146.8		29.97	. Found	. Found	. Found	. Found	. Found	. Found	. Found	. Found	. Found	. Found	. Found	. Found	. Found	. Found	. Found	. Found	. Found	. Found	. Found	. Found	. Found	. Found	. Found	. Found	. Found	. Found	. Found	. Found	. Found
	High	[K].GISTSAASPAVGTVGMDMDEDDDFSKWNFYYSPQSSPDK.[K]	1xCarbamyl [K26]; 2xOxidation [M16; M18]	P04114 1xCarbamyl [K4021]	0,0521604	0,0010353	3	P04114	Apolipoprotein B-100 OS=Homo sapiens OX=9606 GN=APOB PE=1 SV=2	P04114 [3996-4034]	1	427780740	0	1.146	0.998019339144021	42.52	80.3	119.7		29.77	. Found	. Found	. Found	. Found	. Found	. Found	. Found	. Found	. Found	. Found	. Found	. Found	. Found	.	. Found	. Found	. Found	. Found	. Found	. Found	. Found	. Found	. Found	. Found	. Found	. Found	. Found	. Found	. Found
	High	[K].GISTSAASPAVGTVGMDMDEDDDFSKWNFYYSPQSSPDKK.[L]	1xOxidation [M]		1,89924E-05	0	24	P04114	Apolipoprotein B-100 OS=Homo sapiens OX=9606 GN=APOB PE=1 SV=2	P04114 [3996-4035]	2	434690164	0	2.601	0.101432737701754	82.70	43.8	156.2	52.06	66.08	. Found	. Found	. Found	. Found	. Found	. Found	. Found	. Found	. Found	. Found	. Found	.	. Found	. Found	. Found	. Found	.	. Found	. Found	. Found	. Found	. Found	. Found	. Found	. Found	.	. Found	.	.
	High	[K].GISTSAASPAVGTVGMDMDEDDDFSKWNFYYSPQSSPDKK.[L]	2xOxidation [M16; M18]		0,000187165	0	4	P04114	Apolipoprotein B-100 OS=Homo sapiens OX=9606 GN=APOB PE=1 SV=2	P04114 [3996-4035]	2	436289655	0	0.814	0.908940010185694	90.47	123.4	76.6	138.33	100.62	. Found	. Found	. Found	. Found	. Found	. Found	. Found	. Found	. Found	. Found	. Found	. Found	.	. Found	. Found	. Found	. Found	. Found	. Found	. Found	. Found	. Found	. Found	. Found	. Found	.	. Found	.	. Found
	High	[K].GISTSAASPAVGTVGMDMDEDDDFSKWNFYYSPQSSPDKK.[L]	1xCarbamyl [K26]; 1xOxidation [M]	P04114 1xCarbamyl [K4021]	0,158023	0,00589454	4	P04114	Apolipoprotein B-100 OS=Homo sapiens OX=9606 GN=APOB PE=1 SV=2	P04114 [3996-4035]	2	438990745	0								. Found	. Found	. Found	. Found	. Found	. Found	. Found	. Found	. Found	.	. Found	. Found	. Found	. Found	. Found	. Found	. Found	. Found	. Found	. Found	. Found	. Found	. Found	. Found	. Found	. Found	. Found	. Found	. Found
	High	[K].GISTSAASPAVGTVGMDMDEDDDFSKWNFYYSPQSSPDKK.[L]	1xCarbamyl [K26]; 2xOxidation [M16; M18]	P04114 1xCarbamyl [K4021]	0,0433877	0,000840285	3	P04114	Apolipoprotein B-100 OS=Homo sapiens OX=9606 GN=APOB PE=1 SV=2	P04114 [3996-4035]	2	440590237	0								. Found	. Found	. Found	. Found	. Found	. Found	. Found	. Found	. Found	. Found	. Found	. Found	. Found	. Found	. Found	. Found	. Found	. Found	. Found	. Found	. Found	. Found	. Found	. Found	. Found	. Found	. Found	. Found	. Found
	High	[K].GISTSAASPAVGTVGMDMDEDDDFSKWNFYYSPQSSPDKK.[L]			0,00136626	0	5	P04114	Apolipoprotein B-100 OS=Homo sapiens OX=9606 GN=APOB PE=1 SV=2	P04114 [3996-4035]	2	433090672	0	1.412	0.971416933833259	106.33	62.0	138.0	89.01	72.71	. Found	. Found	. Found	. Found	. Found	. Found	. Found	. Found	. Found	. Found	. Found	. Found	. Found	. Found	. Found	. Found	. Found	. Found	. Found	. Found	. Found	. Found	. Found	. Found	. Found	. Found	. Found	. Found	. Found
	High	[K].GLLIFDASSSWGPQMSASVHLDSK.[K]			1,15893E-05	0	12	P04114	Apolipoprotein B-100 OS=Homo sapiens OX=9606 GN=APOB PE=1 SV=2	P04114 [1451-1474]	0	253323915	0	1.357	0.97619640388844	129.39	91.8	108.2	61.19	91.88	. Found	. Found	. Found	.	.	.	. Found	. Found	. Found	. Found	. Found	. Found	. Found	. Found	. Found	. Found	. Found	. Found	. Found	. Found	. Found	. Found	. Found	. Found	. Found	. Found	. Found	. Found	. Found
	High	[K].GLLIFDASSSWGPQMSASVHLDSK.[K]	1xOxidation [M15]		2,16366E-05	0	21	P04114	Apolipoprotein B-100 OS=Homo sapiens OX=9606 GN=APOB PE=1 SV=2	P04114 [1451-1474]	0	254923406	0	1.467	0.964369058686853	131.81	27.9	172.1	142.99	61.24	. Found	. Found	. Found	. Found	. Found	. Found	. Found	. Found	. Found	. Found	. Found	. Found	.	.	.	. Found	. Found	. Found	.	.	. Found	. Found	. Found	. Found	. Found	. Found	. Found	. Found	. Found
	High	[K].GLLIFDASSSWGPQMSASVHLDSKK.[K]	1xOxidation [M15]		0,101527	0,00302604	1	P04114	Apolipoprotein B-100 OS=Homo sapiens OX=9606 GN=APOB PE=1 SV=2	P04114 [1451-1475]	1	267732903	0								. Found	. Found	. Found	. Found	. Found	. Found	. Found	. Found	. Found	. Found	. Found	. Found	.	. Found	. Found	. Found	. Found	. Found	. Found	. Found	. Found	. Found	. Found	. Found	. Found	. Found	. Found	. Found	. Found
	High	[K].GMALFGEGK.[A]	1xOxidation [M2]		0,0951815	0,00285185	39	P04114	Apolipoprotein B-100 OS=Homo sapiens OX=9606 GN=APOB PE=1 SV=2	P04114 [3006-3014]	0	92544478	0	1.739	0.763686887319941	118.58	59.8	140.2	161.38	80.23	. Found	. Found	. Found	. Found	. Found	. Found	. Found	. Found	. Found	. Found	. Found	. Found	.	.	.	. Found	. Found	.	.	.	.	.	. Found	.	.	.	.	.	.
	High	[K].GMALFGEGK.[A]			0,0490398	0,000840285	56	P04114	Apolipoprotein B-100 OS=Homo sapiens OX=9606 GN=APOB PE=1 SV=2	P04114 [3006-3014]	0	90944986	0	1.698	0.427680047836579	118.17	90.7	109.3	89.27	106.75	.	.	.	.	.	.	.	.	.	.	.	.	.	.	.	.	.	.	.	.	.	. Found	.	.	.	.	.	.	.
	High	[K].GMALFGEGKAEFTGR.[H]			0,00316197	0,000313424	16	P04114	Apolipoprotein B-100 OS=Homo sapiens OX=9606 GN=APOB PE=1 SV=2	P04114 [3006-3020]	1	157076824	0	1.270	0.990981590338927	117.37	121.3	78.7	46.72	94.96	. Found	. Found	. Found	. Found	. Found	. Found	. Found	. Found	. Found	. Found	. Found	. Found	. Found	. Found	. Found	. Found	.	.	. Found	. Found	. Found	. Found	. Found	. Found	. Found	. Found	. Found	. Found	. Found
	High	[K].GMTRPLSTLISSSQSCQYTLDAK.[R]	1xCarbamidomethyl [C16]		7,87252E-07	0	79	P04114	Apolipoprotein B-100 OS=Homo sapiens OX=9606 GN=APOB PE=1 SV=2	P04114 [230-252]	0	254424325	0	1.212	0.965273814243824	141.85	92.0	108.0	84.35	111.98	.	.	.	.	.	. Found	.	.	.	.	.	.	.	. Found	.	.	.	.	.	. Found	. Found	. Found	.	. Found	.	.	.	.	.
	High	[K].GMTRPLSTLISSSQSCQYTLDAK.[R]	1xCarbamidomethyl [C16]; 1xOxidation [M2]		1,05642E-05	0	88	P04114	Apolipoprotein B-100 OS=Homo sapiens OX=9606 GN=APOB PE=1 SV=2	P04114 [230-252]	0	256023816	0	1.850	0.26713656095411	129.04	89.1	110.9	94.67	98.25	.	.	.	.	.	.	. Found	.	. Found	.	.	.	.	.	.	.	.	.	.	.	.	.	.	.	.	.	.	.	.
	High	[K].GNVATEISTER.[D]			0,00214921	0,000313424	68	P04114	Apolipoprotein B-100 OS=Homo sapiens OX=9606 GN=APOB PE=1 SV=2	P04114 [197-207]	0	117658551	0	1.195	0.979031584670884	103.63	100.6	99.4	67.26	87.10	.	.	.	.	.	.	. Found	.	.	.	.	.	.	.	.	.	.	.	.	.	.	.	.	.	.	.	.	.	.
	High	[K].GNVATEISTERDLGQCDR.[F]	1xCarbamidomethyl [C16]		0,0014098	0	29	P04114	Apolipoprotein B-100 OS=Homo sapiens OX=9606 GN=APOB PE=1 SV=2	P04114 [197-214]	1	202093526	0	3.358	0.000562056153791015	135.55	43.8	156.2	80.86	95.13	.	.	.	.	.	.	. Found	. Found	. Found	.	.	.	. Found	.	. Found	.	.	.	. Found	. Found	. Found	. Found	. Found	. Found	. Found	. Found	. Found	. Found	. Found
	High	[K].GSTSHHLVSR.[K]			0,0385996	0,000840285	1	P04114	Apolipoprotein B-100 OS=Homo sapiens OX=9606 GN=APOB PE=1 SV=2	P04114 [1948-1957]	0	108055448	0								. Found	. Found	. Found	. Found	. Found	. Found	. Found	. Found	. Found	. Found	. Found	. Found	. Found	. Found	. Found	. Found	. Found	. Found	. Found	. Found	. Found	. Found	. Found	. Found	. Found	. Found	. Found	. Found	. Found
	High	[K].GSTSHHLVSRK.[S]			0,112381	0,00369184	6	P04114	Apolipoprotein B-100 OS=Homo sapiens OX=9606 GN=APOB PE=1 SV=2	P04114 [1948-1958]	1	120864944	0	2.650	0.26713656095411	116.19	74.2	125.8	127.08	85.05	. Found	. Found	. Found	. Found	. Found	. Found	. Found	. Found	. Found	. Found	. Found	. Found	.	.	. Found	. Found	. Found	. Found	. Found	. Found	. Found	. Found	. Found	. Found	. Found	. Found	. Found	. Found	. Found
	High	[K].GTYGLSCQR.[D]	1xCarbamidomethyl [C7]		0,0640237	0,00141145	40	P04114	Apolipoprotein B-100 OS=Homo sapiens OX=9606 GN=APOB PE=1 SV=2	P04114 [1499-1507]	0	104147820	0	1.315	0.990053867831782	86.68	79.7	120.3	25.14	88.37	.	.	.	.	.	.	. Found	. Found	. Found	.	.	.	.	.	.	.	.	.	.	.	. Found	. Found	. Found	. Found	.	.	.	. Found	. Found
	High	[K].GTYGLSCQRDPNTGR.[L]	1xCarbamidomethyl [C7]		0,0233515	0,000840285	10	P04114	Apolipoprotein B-100 OS=Homo sapiens OX=9606 GN=APOB PE=1 SV=2	P04114 [1499-1513]	1	168177109	0	1.756	0.784475017749734	64.36	75.8	124.2	51.69	45.48	. Found	. Found	. Found	. Found	. Found	. Found	. Found	. Found	. Found	. Found	. Found	. Found	. Found	.	. Found	. Found	. Found	. Found	. Found	. Found	. Found	. Found	. Found	. Found	. Found	. Found	. Found	. Found	. Found
	High	[K].HFVINLIGDFEVAEK.[I]			5,40686E-05	0	12	P04114	Apolipoprotein B-100 OS=Homo sapiens OX=9606 GN=APOB PE=1 SV=2	P04114 [2319-2333]	0	173091120	0	0.612	0.258119516860618	33.97	82.8	117.2	100.93	83.05	. Found	. Found	. Found	. Found	. Found	. Found	. Found	. Found	. Found	. Found	. Found	. Found	.	.	.	. Found	. Found	. Found	. Found	. Found	. Found	. Found	. Found	. Found	.	.	. Found	. Found	. Found
	High	[K].HINIDQFVR.[K]			0,00267057	0,000313424	104	P04114	Apolipoprotein B-100 OS=Homo sapiens OX=9606 GN=APOB PE=1 SV=2	P04114 [2101-2109]	0	114161127	0	1.509	0.674713289414514	115.01	89.3	110.7	114.74	98.83	.	.	.	.	.	.	.	.	.	.	.	.	.	.	.	.	.	.	.	.	.	.	.	.	.	.	.	.	.
	High	[K].HINIDQFVRK.[Y]			0,0106723	0,000750615	44	P04114	Apolipoprotein B-100 OS=Homo sapiens OX=9606 GN=APOB PE=1 SV=2	P04114 [2101-2110]	1	126970623	0	1.588	0.935524349630532	102.24	89.4	110.6	61.49	92.19	.	.	.	.	.	.	. Found	. Found	. Found	.	.	.	.	.	.	.	.	.	. Found	. Found	. Found	. Found	.	. Found	. Found	. Found	. Found	.	.
	High	[K].HIYAISSAALSASYK.[A]			7,41983E-06	0	71	P04114	Apolipoprotein B-100 OS=Homo sapiens OX=9606 GN=APOB PE=1 SV=2	P04114 [1838-1852]	0	158182713	0	2.080	0.311317221298725	121.34	76.0	124.0	152.48	104.72	. Found	.	.	.	.	. Found	. Found	. Found	. Found	.	.	. Found	.	.	.	.	.	.	.	.	.	.	.	. Found	.	.	.	.	.
	High	[K].HIYAISSAALSASYKADTVAK.[V]			1,17494E-05	0	18	P04114	Apolipoprotein B-100 OS=Homo sapiens OX=9606 GN=APOB PE=1 SV=2	P04114 [1838-1858]	1	216713936	0	2.548	0.365675370233798	93.11	52.0	148.0	90.51	70.00	. Found	. Found	. Found	. Found	. Found	. Found	. Found	. Found	. Found	. Found	. Found	. Found	.	.	.	. Found	. Found	. Found	. Found	. Found	. Found	. Found	. Found	. Found	. Found	. Found	. Found	. Found	. Found
	High	[K].HKLIDVISMYR.[E]	1xOxidation [M9]		0,0483977	0,000840285	3	P04114	Apolipoprotein B-100 OS=Homo sapiens OX=9606 GN=APOB PE=1 SV=2	P04114 [4260-4270]	1	139075113	0	0.249	0.0113499809252175	1.87	149.5	50.5		55.98	. Found	. Found	. Found	. Found	. Found	. Found	. Found	. Found	. Found	. Found	. Found	. Found	.	.	. Found	. Found	. Found	. Found	. Found	. Found	. Found	. Found	. Found	. Found	. Found	. Found	. Found	. Found	. Found
	High	[K].HLIDSLIDFLNFPR.[F]			5,27858E-05	0	80	P04114	Apolipoprotein B-100 OS=Homo sapiens OX=9606 GN=APOB PE=1 SV=2	P04114 [4188-4201]	0	169991662	0	1.800	0.791791336826113	112.37	68.8	131.2	108.58	65.37	.	.	.	.	.	.	.	.	.	.	.	.	.	.	.	.	.	.	.	. Found	.	.	.	. Found	.	.	.	.	.
	High	[K].HRHSITNPLAVLCEFISQSIK.[S]	1xCarbamidomethyl [C13]		0,00330209	0,000313424	12	P04114	Apolipoprotein B-100 OS=Homo sapiens OX=9606 GN=APOB PE=1 SV=2	P04114 [3182-3202]	1	245029727	0	3.435	0.0847035538305947	108.61	59.0	141.0	67.36	82.40	. Found	. Found	. Found	. Found	.	. Found	. Found	. Found	. Found	. Found	. Found	. Found	.	.	. Found	. Found	. Found	. Found	. Found	. Found	. Found	. Found	. Found	. Found	. Found	. Found	. Found	. Found	. Found
	High	[K].HVAEAICK.[E]	1xCarbamidomethyl [C7]		0,012835	0,000750615	68	P04114	Apolipoprotein B-100 OS=Homo sapiens OX=9606 GN=APOB PE=1 SV=2	P04114 [255-262]	0	92747166	0	0.912	0.93366471465821	90.79	131.6	68.4	43.07	130.20	.	.	.	.	.	.	.	.	. Found	.	.	.	.	.	.	.	.	.	. Found	.	.	. Found	.	.	.	.	.	.	.
	High	[K].HVAEAICKEQHLFLPFSYK.[N]	1xCarbamidomethyl [C7]		1,95385E-06	0	71	P04114	Apolipoprotein B-100 OS=Homo sapiens OX=9606 GN=APOB PE=1 SV=2	P04114 [255-273]	1	231717978	0	1.830	0.726413069076966	109.74	79.7	120.3	84.79	80.63	.	. Found	.	.	.	.	.	. Found	. Found	.	.	.	.	.	.	.	.	.	. Found	.	.	.	.	.	.	. Found	.	.	.
	High	[K].IADFELPTIIVPEQTIEIPSIK.[F]			4,4314E-05	0	123	P04114	Apolipoprotein B-100 OS=Homo sapiens OX=9606 GN=APOB PE=1 SV=2	P04114 [3847-3868]	0	246637417	0	3.786	8.91954924887666E-05	118.20	38.0	162.0	90.83	93.25	. Found	.	.	.	.	.	.	.	.	.	.	.	.	.	.	.	.	.	.	.	.	.	.	.	.	.	.	.	.
	High	[K].IAELSATAQEIIK.[S]			0,000586559	0	86	P04114	Apolipoprotein B-100 OS=Homo sapiens OX=9606 GN=APOB PE=1 SV=2	P04114 [4466-4478]	0	138678387	0	1.854	0.263389394357945	108.04	87.3	112.7	91.99	94.91	.	.	.	.	.	.	. Found	. Found	. Found	.	.	.	.	.	.	.	.	.	.	.	.	. Found	. Found	. Found	. Found	.	. Found	.	. Found
	High	[K].IAIANIIDEIIEK.[L]			0,000161498	0	9	P04114	Apolipoprotein B-100 OS=Homo sapiens OX=9606 GN=APOB PE=1 SV=2	P04114 [2196-2208]	0	145484647	0	1.542	0.951212766667207	92.93	111.5	88.5	67.69	88.62	. Found	. Found	. Found	. Found	. Found	. Found	. Found	. Found	. Found	. Found	. Found	. Found	.	.	.	. Found	. Found	. Found	. Found	. Found	. Found	. Found	. Found	. Found	. Found	. Found	. Found	. Found	. Found
	High	[K].IDDIWNLEVK.[E]			0,00226667	0,000313424	65	P04114	Apolipoprotein B-100 OS=Homo sapiens OX=9606 GN=APOB PE=1 SV=2	P04114 [3538-3547]	0	124465213	0	1.573	0.588380518819655	117.35	79.8	120.2	100.65	95.37	.	.	.	.	.	.	.	. Found	.	.	.	.	.	.	.	.	.	.	.	.	.	.	.	.	.	.	.	.	.
	High	[K].IDDIWNLEVKENFAGEATLQR.[I]			2,92873E-06	0	13	P04114	Apolipoprotein B-100 OS=Homo sapiens OX=9606 GN=APOB PE=1 SV=2	P04114 [3538-3558]	1	246123578	0	3.215	0.0165075030030485	76.62	40.3	159.7	74.05	25.53	. Found	. Found	. Found	. Found	. Found	. Found	. Found	. Found	. Found	. Found	. Found	. Found	.	.	.	. Found	. Found	. Found	. Found	. Found	. Found	. Found	. Found	. Found	. Found	. Found	. Found	. Found	. Found
	High	[K].IDFLNNYALFLSPSAQQASWQVSAR.[F]			9,14676E-06	0	28	P04114	Apolipoprotein B-100 OS=Homo sapiens OX=9606 GN=APOB PE=1 SV=2	P04114 [3068-3092]	0	282642095	0	2.228	0.45003286511407	113.20	61.3	138.7	73.16	96.84	.	.	.	.	. Found	.	. Found	. Found	. Found	.	. Found	.	.	.	.	. Found	.	. Found	. Found	. Found	. Found	. Found	. Found	. Found	. Found	.	.	. Found	.
	High	[K].IEDGTLASK.[T]			0,0111845	0,000750615	49	P04114	Apolipoprotein B-100 OS=Homo sapiens OX=9606 GN=APOB PE=1 SV=2	P04114 [3936-3944]	0	93348875	0	1.160	0.983458986076177	110.34	118.0	82.0	73.26	107.95	.	.	.	.	.	.	.	.	.	.	.	.	.	.	. Found	.	.	.	.	.	.	.	.	.	.	.	.	.	.
	High	[K].IEGNLIFDPNNYLPK.[E]			0,000253987	0	103	P04114	Apolipoprotein B-100 OS=Homo sapiens OX=9606 GN=APOB PE=1 SV=2	P04114 [655-669]	0	174690611	3	1.360	0.859597495589078	102.75	91.9	108.1	82.13	98.19	.	.	.	.	.	.	. Found	.	.	.	.	.	.	.	.	.	.	.	.	.	.	.	.	.	.	.	.	.	.
	High	[K].IEIPLPFGGK.[S]			0,00394591	0,000313424	61	P04114	Apolipoprotein B-100 OS=Homo sapiens OX=9606 GN=APOB PE=1 SV=2	P04114 [1296-1305]	0	107062446	0	1.725	0.39685454311387	105.09	79.0	121.0	70.63	88.28	.	.	.	.	.	.	. Found	.	.	.	.	.	.	.	.	.	.	.	.	.	. Found	.	.	.	.	.	.	.	.
	High	[K].IGVELTGR.[T]			0,150252	0,00537401	46	P04114	Apolipoprotein B-100 OS=Homo sapiens OX=9606 GN=APOB PE=1 SV=2	P04114 [2005-2012]	0	84448869	0	1.754	0.363137365749979	109.16	78.9	121.1	123.72	85.88	.	.	. Found	.	.	.	.	.	.	.	.	. Found	.	.	.	.	.	.	.	. Found	.	.	.	.	.	.	.	.	.
	High	[K].IISDYHQQFR.[Y]			0,00143962	0	58	P04114	Apolipoprotein B-100 OS=Homo sapiens OX=9606 GN=APOB PE=1 SV=2	P04114 [4487-4496]	0	130665386	0	1.866	0.253845925185799	130.46	56.8	143.2	128.83	99.10	. Found	.	.	.	.	.	.	.	. Found	.	.	.	.	.	.	.	.	.	.	.	.	.	. Found	.	.	.	.	.	.
	High	[K].IKFDKYK.[A]			0,154445	0,00537401	27	P04114	Apolipoprotein B-100 OS=Homo sapiens OX=9606 GN=APOB PE=1 SV=2	P04114 [3228-3234]	2	94154548	0	1.897	0.681136159585891	104.53	100.4	99.6	51.04	77.99	. Found	.	. Found	. Found	.	. Found	. Found	. Found	. Found	. Found	.	. Found	. Found	. Found	.	.	.	.	. Found	. Found	. Found	.	.	.	. Found	.	. Found	.	.
	High	[K].IKGVISIPR.[L]			0,137049	0,00472966	4	P04114	Apolipoprotein B-100 OS=Homo sapiens OX=9606 GN=APOB PE=1 SV=2	P04114 [1120-1128]	1	98264078	0	1.312	0.994806865988899	89.56	88.8	111.2	89.65	75.55	. Found	. Found	. Found	. Found	. Found	. Found	. Found	. Found	. Found	. Found	. Found	. Found	. Found	.	. Found	. Found	. Found	. Found	. Found	.	. Found	. Found	. Found	. Found	. Found	. Found	. Found	. Found	. Found
	High	[K].INFNEK.[L]			0,23702	0,00880595	32	P04114	Apolipoprotein B-100 OS=Homo sapiens OX=9606 GN=APOB PE=1 SV=2	P04114 [2165-2170]	0	76439373	0	1.212	0.965273814243824	112.21	102.5	97.5	107.95	105.44	. Found	.	.	.	.	.	. Found	. Found	. Found	.	.	.	. Found	. Found	. Found	.	.	.	. Found	. Found	. Found	.	. Found	. Found	. Found	.	.	. Found	.
	High	[K].INNQLTLDSNTK.[Y]			0,0016157	0	44	P04114	Apolipoprotein B-100 OS=Homo sapiens OX=9606 GN=APOB PE=1 SV=2	P04114 [2877-2888]	0	136070668	0	1.503	0.931734120262598	110.63	85.3	114.7	123.80	93.91	.	.	.	.	.	. Found	.	.	.	.	.	.	.	.	.	.	.	.	.	.	.	. Found	.	.	. Found	.	.	.	.
	High	[K].INPLALK.[E]			0,155154	0,00537401	62	P04114	Apolipoprotein B-100 OS=Homo sapiens OX=9606 GN=APOB PE=1 SV=2	P04114 [2819-2825]	0	76849780	0	1.894	0.230109585638959	128.88	79.2	120.8	140.67	93.36	.	.	.	.	.	.	.	.	.	.	.	.	.	.	.	.	.	.	.	.	.	.	.	.	.	.	.	.	.
	High	[K].INPLALKESVK.[F]			0,00280795	0,000313424	17	P04114	Apolipoprotein B-100 OS=Homo sapiens OX=9606 GN=APOB PE=1 SV=2	P04114 [2819-2829]	1	121173580	0	1.769	0.830255084009444	113.29	73.6	126.4	86.81	80.97	. Found	. Found	. Found	. Found	. Found	. Found	. Found	. Found	. Found	. Found	. Found	. Found	. Found	.	.	. Found	. Found	. Found	.	. Found	. Found	. Found	. Found	. Found	. Found	. Found	. Found	. Found	. Found
	High	[K].ITEVALMGHLSCDTK.[E]	1xCarbamidomethyl [C12]		1,96551E-05	0	70	P04114	Apolipoprotein B-100 OS=Homo sapiens OX=9606 GN=APOB PE=1 SV=2	P04114 [1101-1115]	0	167481895	0	2.060	0.612080399372141	118.26	82.4	117.6	61.44	101.78	.	.	.	.	.	.	. Found	. Found	. Found	.	.	.	.	.	.	.	.	.	. Found	.	.	. Found	. Found	. Found	.	. Found	.	. Found	. Found
	High	[K].ITEVALMGHLSCDTKEER.[K]	1xCarbamidomethyl [C12]		1,46975E-06	0	78	P04114	Apolipoprotein B-100 OS=Homo sapiens OX=9606 GN=APOB PE=1 SV=2	P04114 [1101-1118]	1	208900525	0	1.878	0.480792210510924	129.85	91.5	108.5	65.32	117.77	.	. Found	.	.	.	.	.	.	.	.	.	.	.	.	.	.	.	.	.	.	.	.	. Found	.	. Found	.	.	.	.
	High	[K].ITEVALMGHLSCDTKEER.[K]	1xCarbamidomethyl [C12]; 1xOxidation [M7]		0,000357918	0	11	P04114	Apolipoprotein B-100 OS=Homo sapiens OX=9606 GN=APOB PE=1 SV=2	P04114 [1101-1118]	1	210500017	0	1.427	0.940196614154894	63.00	82.4	117.6		46.54	. Found	. Found	. Found	. Found	. Found	. Found	. Found	. Found	. Found	. Found	. Found	. Found	. Found	. Found	. Found	. Found	. Found	. Found	. Found	. Found	. Found	. Found	. Found	. Found	. Found	. Found	. Found	. Found	. Found
	High	[K].ITEVALMGHLSCDTKEERK.[I]	1xCarbamidomethyl [C12]		0,149564	0,00537401	1	P04114	Apolipoprotein B-100 OS=Homo sapiens OX=9606 GN=APOB PE=1 SV=2	P04114 [1101-1119]	2	221710021	0								. Found	. Found	. Found	. Found	. Found	. Found	. Found	. Found	. Found	. Found	. Found	. Found	. Found	. Found	. Found	. Found	. Found	. Found	. Found	. Found	. Found	. Found	. Found	. Found	. Found	. Found	. Found	. Found	. Found
	High	[K].ITLIINWLQEALSSASLAHMK.[A]			0,00250422	0,000313424	2	P04114	Apolipoprotein B-100 OS=Homo sapiens OX=9606 GN=APOB PE=1 SV=2	P04114 [2489-2509]	0	233927916	0	100.000	1.18764845605701E-16			200.0		74.75	. Found	. Found	. Found	. Found	. Found	. Found	. Found	. Found	. Found	. Found	. Found	. Found	. Found	. Found	. Found	. Found	. Found	. Found	. Found	. Found	. Found	. Found	. Found	. Found	. Found	. Found	. Found	. Found	. Found
	High	[K].ITLIINWLQEALSSASLAHMK.[A]	1xOxidation [M20]		0,0295074	0,000840285	1	P04114	Apolipoprotein B-100 OS=Homo sapiens OX=9606 GN=APOB PE=1 SV=2	P04114 [2489-2509]	0	235527408	0	0.759	0.92520524963809	64.38	74.4	125.6	128.38	63.76	. Found	. Found	. Found	. Found	. Found	. Found	. Found	. Found	. Found	. Found	. Found	. Found	. Found	.	. Found	. Found	. Found	. Found	. Found	. Found	. Found	. Found	. Found	. Found	. Found	. Found	. Found	. Found	. Found
	High	[K].IVQILPWEQNEQVK.[N]			0,00068927	0	99	P04114	Apolipoprotein B-100 OS=Homo sapiens OX=9606 GN=APOB PE=1 SV=2	P04114 [577-590]	0	172393775	0	1.879	0.241026269226355	126.66	89.6	110.4	98.83	114.37	.	.	.	.	.	. Found	. Found	. Found	. Found	.	.	.	.	.	.	.	.	.	.	.	.	.	.	.	.	.	.	.	.
	High	[K].IVQILPWEQNEQVKNFVASHIANILNSEELDIQDLKK.[L]			0,000824244	0	29	P04114	Apolipoprotein B-100 OS=Homo sapiens OX=9606 GN=APOB PE=1 SV=2	P04114 [577-613]	2	431629251	0	2.703	0.157597288100442	137.74	62.4	137.6	71.84	133.83	. Found	. Found	. Found	. Found	. Found	. Found	. Found	. Found	. Found	. Found	.	.	. Found	. Found	. Found	.	.	.	. Found	. Found	. Found	. Found	. Found	. Found	. Found	. Found	. Found	. Found	. Found
	High	[K].KGISTSAASPAVGTVGMDMDEDDDFSK.[W]	1xOxidation [M]		0,000107372	0	5	P04114	Apolipoprotein B-100 OS=Homo sapiens OX=9606 GN=APOB PE=1 SV=2	P04114 [3995-4021]	1	274720223	0	100.000	1.18764845605701E-16			200.0		7.01	. Found	. Found	. Found	. Found	. Found	. Found	. Found	. Found	. Found	. Found	. Found	. Found	. Found	. Found	. Found	. Found	. Found	. Found	. Found	. Found	. Found	. Found	. Found	. Found	. Found	. Found	. Found	. Found	. Found
	High	[K].KIISDYHQQFR.[Y]			0,000141761	0	102	P04114	Apolipoprotein B-100 OS=Homo sapiens OX=9606 GN=APOB PE=1 SV=2	P04114 [4486-4496]	1	143474882	0	0.970	0.937675985166436	117.73	94.7	105.3	82.18	97.39	.	.	.	.	.	.	. Found	. Found	. Found	.	.	.	.	.	.	.	.	.	.	.	.	. Found	. Found	.	.	. Found	.	. Found	. Found
	High	[K].KITEVALMGHLSCDTK.[E]	1xCarbamidomethyl [C13]		1,90096E-06	0	32	P04114	Apolipoprotein B-100 OS=Homo sapiens OX=9606 GN=APOB PE=1 SV=2	P04114 [1100-1115]	1	180291392	0	3.410	0.0428618957065342	130.63	76.5	123.5	58.63	114.57	. Found	. Found	.	.	.	.	. Found	.	. Found	.	.	.	.	.	.	.	.	.	. Found	.	. Found	. Found	. Found	. Found	. Found	.	.	.	. Found
	High	[K].KITEVALMGHLSCDTKEER.[K]	1xCarbamidomethyl [C13]		5,9166E-06	0	67	P04114	Apolipoprotein B-100 OS=Homo sapiens OX=9606 GN=APOB PE=1 SV=2	P04114 [1100-1118]	2	221710021	1	1.852	0.719174165289037	113.28	86.1	113.9	55.70	102.70	.	.	.	.	.	.	.	.	. Found	.	.	.	.	.	.	.	.	.	.	.	.	. Found	. Found	. Found	.	.	.	.	.
	High	[K].KKQHLFVK.[E]			0,0086263	0,000750615	15	P04114	Apolipoprotein B-100 OS=Homo sapiens OX=9606 GN=APOB PE=1 SV=2	P04114 [1475-1482]	2	102764111	0	1.318	0.977134742088879	83.98	105.4	94.6	27.87	71.05	. Found	.	.	. Found	.	.	. Found	. Found	. Found	. Found	. Found	. Found	.	.	. Found	. Found	.	. Found	. Found	. Found	. Found	. Found	. Found	. Found	. Found	. Found	. Found	. Found	. Found
	High	[K].KLNELSFK.[T]			0,0384336	0,000840285	5	P04114	Apolipoprotein B-100 OS=Homo sapiens OX=9606 GN=APOB PE=1 SV=2	P04114 [2403-2410]	1	97856186	0	0.452	0.225541996511238	7.85	113.5	86.5	81.23	24.86	. Found	. Found	. Found	. Found	. Found	. Found	. Found	. Found	. Found	. Found	. Found	. Found	.	.	.	. Found	. Found	. Found	. Found	. Found	. Found	. Found	. Found	. Found	. Found	. Found	. Found	. Found	. Found
	High	[K].KLTISEQNIQR.[A]			0,000576581	0	75	P04114	Apolipoprotein B-100 OS=Homo sapiens OX=9606 GN=APOB PE=1 SV=2	P04114 [334-344]	1	132974849	0	1.341	0.874304886327656	100.15	100.8	99.2	66.60	86.85	.	.	.	.	.	.	.	.	.	.	.	.	.	.	.	.	.	.	.	.	.	.	.	.	.	.	.	.	.
	High	[K].KMGLAFESTK.[S]			0,000933141	0	62	P04114	Apolipoprotein B-100 OS=Homo sapiens OX=9606 GN=APOB PE=1 SV=2	P04114 [305-314]	1	111158161	0	1.148	0.994806865988899	102.76	122.8	77.2	58.77	97.65	.	.	.	.	.	.	.	.	.	.	.	.	.	.	.	.	.	.	.	.	.	.	.	.	.	.	.	.	.
	High	[K].KMGLAFESTK.[S]	1xOxidation [M2]		0,00262323	0,000313424	45	P04114	Apolipoprotein B-100 OS=Homo sapiens OX=9606 GN=APOB PE=1 SV=2	P04114 [305-314]	1	112757652	0	0.713	0.643890125988834	57.62	100.2	99.8	108.00	74.83	. Found	. Found	. Found	. Found	. Found	. Found	. Found	. Found	. Found	.	.	.	.	.	.	. Found	.	. Found	.	.	. Found	.	.	.	.	.	. Found	.	.
	High	[K].KMTSNFPVDLSDYPK.[S]			6,33675E-06	0	72	P04114	Apolipoprotein B-100 OS=Homo sapiens OX=9606 GN=APOB PE=1 SV=2	P04114 [1188-1202]	1	174184655	0	1.957	0.575306926584912	134.16	61.3	138.7	85.09	105.90	.	.	.	.	.	.	.	.	.	.	.	.	.	.	.	.	.	.	. Found	.	. Found	.	.	. Found	.	.	.	.	.
	High	[K].KMTSNFPVDLSDYPK.[S]	1xOxidation [M2]		1,41404E-05	0	66	P04114	Apolipoprotein B-100 OS=Homo sapiens OX=9606 GN=APOB PE=1 SV=2	P04114 [1188-1202]	1	175784146	0	1.819	0.736194672727336	135.50	38.6	161.4	193.23	64.15	. Found	. Found	. Found	. Found	.	. Found	. Found	. Found	. Found	.	.	. Found	.	.	.	.	.	.	.	.	.	.	.	.	.	.	.	.	.
	High	[K].LAIPEGK.[Q]			0,0987562	0,00302604	66	P04114	Apolipoprotein B-100 OS=Homo sapiens OX=9606 GN=APOB PE=1 SV=2	P04114 [133-139]	0	72743487	0	1.334	0.883826867405531	105.32	95.1	104.9	75.58	83.99	.	.	.	.	.	.	.	.	.	.	.	. Found	.	.	.	.	.	.	.	.	.	.	.	.	.	.	.	.	.
	High	[K].LALWGEHTGQLYSK.[F]			2,58615E-05	0	97	P04114	Apolipoprotein B-100 OS=Homo sapiens OX=9606 GN=APOB PE=1 SV=2	P04114 [1917-1930]	0	160282747	0	1.756	0.36167137455245	117.54	78.5	121.5	139.27	100.16	.	.	.	.	.	.	. Found	. Found	. Found	.	.	.	.	.	.	.	.	.	.	.	.	.	.	.	.	.	.	.	.
	High	[K].LATALSLSNK.[F]			0,00219541	0,000313424	65	P04114	Apolipoprotein B-100 OS=Homo sapiens OX=9606 GN=APOB PE=1 SV=2	P04114 [3395-3404]	0	101759389	0	1.930	0.204050168813868	120.28	81.0	119.0	139.45	107.12	.	.	.	.	.	.	.	.	.	.	.	.	.	.	.	.	.	.	.	.	.	.	.	.	.	.	.	.	.
	High	[K].LDFREIQIYKK.[L]			0,193029	0,00643402	3	P04114	Apolipoprotein B-100 OS=Homo sapiens OX=9606 GN=APOB PE=1 SV=2	P04114 [3763-3773]	2	145282093	0	1.509	0.874304886327656	71.20	89.6	110.4	49.93	46.88	. Found	.	. Found	. Found	. Found	.	. Found	. Found	. Found	. Found	. Found	. Found	. Found	. Found	. Found	. Found	. Found	. Found	. Found	. Found	. Found	. Found	. Found	. Found	. Found	. Found	. Found	. Found	. Found
	High	[K].LDFSSQADLR.[N]			0,00445336	0,000313424	35	P04114	Apolipoprotein B-100 OS=Homo sapiens OX=9606 GN=APOB PE=1 SV=2	P04114 [2898-2907]	0	115156913	0	1.814	0.693184290866367	82.98	75.9	124.1	103.74	84.66	.	.	.	. Found	. Found	. Found	. Found	. Found	. Found	.	.	.	.	.	.	.	.	.	. Found	.	.	. Found	. Found	. Found	.	.	.	. Found	. Found
	High	[K].LDFSSQADLRNEIK.[T]			5,03107E-05	0	77	P04114	Apolipoprotein B-100 OS=Homo sapiens OX=9606 GN=APOB PE=1 SV=2	P04114 [2898-2911]	1	163583368	0	2.125	0.248688351051733	121.41	67.7	132.3	126.41	88.58	.	.	.	.	.	. Found	.	.	. Found	.	.	.	.	.	.	.	.	.	.	.	. Found	.	.	.	. Found	.	.	.	.
	High	[K].LDNIYSSDK.[F]			0,0123382	0,000750615	10	P04114	Apolipoprotein B-100 OS=Homo sapiens OX=9606 GN=APOB PE=1 SV=2	P04114 [1770-1778]	0	105450513	0	0.972	0.884322188652115	81.71	112.3	87.7	58.10	83.41	. Found	. Found	. Found	. Found	. Found	. Found	. Found	. Found	. Found	. Found	. Found	. Found	.	.	.	. Found	. Found	. Found	. Found	. Found	. Found	. Found	. Found	. Found	. Found	. Found	. Found	. Found	. Found
	High	[K].LDNIYSSDKFYK.[Q]			0,000388631	0	73	P04114	Apolipoprotein B-100 OS=Homo sapiens OX=9606 GN=APOB PE=1 SV=2	P04114 [1770-1781]	1	149273184	0	1.650	0.831802445989089	133.40	59.5	140.5	145.56	109.69	.	.	.	.	.	.	. Found	. Found	.	.	.	.	.	.	.	.	.	.	.	.	.	.	. Found	.	.	.	.	.	. Found
	High	[K].LDVTTSIGR.[R]			0,0142299	0,000750615	26	P04114	Apolipoprotein B-100 OS=Homo sapiens OX=9606 GN=APOB PE=1 SV=2	P04114 [3690-3698]	0	96153129	0	2.209	0.0735544407123375	126.89	78.4	121.6	102.52	121.14	. Found	. Found	. Found	. Found	. Found	. Found	. Found	. Found	. Found	.	.	. Found	.	.	.	. Found	.	.	.	.	.	.	.	.	. Found	. Found	. Found	.	. Found
	High	[K].LDVTTSIGRR.[Q]			0,00949875	0,000750615	73	P04114	Apolipoprotein B-100 OS=Homo sapiens OX=9606 GN=APOB PE=1 SV=2	P04114 [3690-3699]	1	111763240	0	1.361	0.976400251294691	115.10	118.7	81.3	72.18	97.35	.	.	.	.	.	.	. Found	. Found	. Found	.	.	.	.	.	.	.	.	.	.	.	. Found	.	.	.	.	.	.	.	.
	High	[K].LEIQSQVDSQHVGHSVLTAK.[G]			6,03963E-06	0	99	P04114	Apolipoprotein B-100 OS=Homo sapiens OX=9606 GN=APOB PE=1 SV=2	P04114 [2986-3005]	0	217613567	0	2.048	0.484923245105476	127.80	84.4	115.6	110.62	110.42	. Found	.	.	.	.	.	.	.	.	.	.	.	.	.	.	.	.	.	.	.	.	.	. Found	.	.	.	.	.	.
	High	[K].LEVANMQAELVAKPSVSVEFVTNMGIIIPDFAR.[S]	2xOxidation [M6; M24]		9,42498E-05	0	16	P04114	Apolipoprotein B-100 OS=Homo sapiens OX=9606 GN=APOB PE=1 SV=2	P04114 [864-896]	0	362087027	0	1.245	0.999209963067217	109.33	77.9	122.1	124.11	35.70	. Found	. Found	. Found	. Found	. Found	. Found	. Found	. Found	. Found	. Found	. Found	. Found	.	.	.	. Found	. Found	. Found	. Found	.	.	. Found	. Found	. Found	.	.	. Found	. Found	.
	High	[K].LEVANMQAELVAKPSVSVEFVTNMGIIIPDFAR.[S]	1xOxidation [M]		5,51929E-05	0	42	P04114	Apolipoprotein B-100 OS=Homo sapiens OX=9606 GN=APOB PE=1 SV=2	P04114 [864-896]	0	360487535	0	1.226	0.999209963067217	116.45	119.5	80.5	64.18	121.65	. Found	. Found	. Found	. Found	. Found	.	. Found	. Found	. Found	.	.	.	. Found	.	. Found	.	. Found	. Found	. Found	. Found	. Found	.	.	. Found	.	. Found	.	. Found	.
	High	[K].LEVANMQAELVAKPSVSVEFVTNMGIIIPDFAR.[S]	1xCarbamyl [K13]; 1xOxidation [M]	P04114 1xCarbamyl [K876]	0,0992126	0,00302604	5	P04114	Apolipoprotein B-100 OS=Homo sapiens OX=9606 GN=APOB PE=1 SV=2	P04114 [864-896]	0	364788117	0	0.638	0.791574341892791	20.03	122.6	77.4	23.37		. Found	. Found	. Found	. Found	. Found	. Found	. Found	. Found	. Found	. Found	.	. Found	. Found	. Found	. Found	. Found	. Found	. Found	. Found	. Found	. Found	. Found	. Found	. Found	. Found	. Found	. Found	. Found	. Found
	High	[K].LEVANMQAELVAKPSVSVEFVTNMGIIIPDFAR.[S]	1xCarbamyl [K13]; 2xOxidation [M6; M24]	P04114 1xCarbamyl [K876]	0,0947441	0,00285185	8	P04114	Apolipoprotein B-100 OS=Homo sapiens OX=9606 GN=APOB PE=1 SV=2	P04114 [864-896]	0	366387608	0								. Found	. Found	. Found	. Found	. Found	. Found	. Found	. Found	. Found	. Found	. Found	. Found	. Found	. Found	. Found	. Found	.	. Found	. Found	. Found	. Found	. Found	. Found	. Found	. Found	. Found	. Found	. Found	. Found
	High	[K].LEVLNFDFQANAQLSNPK.[I]			7,65247E-06	0	41	P04114	Apolipoprotein B-100 OS=Homo sapiens OX=9606 GN=APOB PE=1 SV=2	P04114 [2801-2818]	0	204804473	0	4.565	0.00260837914131891	95.07	35.1	164.9	76.90	86.39	.	.	.	.	.	.	. Found	. Found	. Found	. Found	. Found	.	.	.	.	.	.	.	. Found	. Found	.	. Found	. Found	. Found	.	.	.	. Found	. Found
	High	[K].LFLEETK.[A]			0,102468	0,00320742	28	P04114	Apolipoprotein B-100 OS=Homo sapiens OX=9606 GN=APOB PE=1 SV=2	P04114 [2468-2474]	0	87948221	0	1.228	0.999850434146449	117.48	91.5	108.5	133.32	108.28	.	.	.	. Found	.	.	. Found	. Found	. Found	. Found	. Found	.	.	.	.	.	.	.	.	. Found	. Found	. Found	. Found	. Found	.	.	.	. Found	. Found
	High	[K].LFLEETKATVAVYLESLQDTK.[I]			0,00407793	0,000313424	8	P04114	Apolipoprotein B-100 OS=Homo sapiens OX=9606 GN=APOB PE=1 SV=2	P04114 [2468-2488]	1	239827518	0	1.788	0.762297677050979	117.94	29.2	170.8	117.71	73.88	. Found	. Found	. Found	. Found	. Found	. Found	. Found	. Found	. Found	. Found	. Found	. Found	.	.	.	. Found	. Found	. Found	. Found	. Found	. Found	. Found	. Found	. Found	. Found	. Found	. Found	. Found	. Found
	High	[K].LGNNPVSK.[G]			0,0293832	0,000840285	50	P04114	Apolipoprotein B-100 OS=Homo sapiens OX=9606 GN=APOB PE=1 SV=2	P04114 [1443-1450]	0	82845739	0	1.461	0.742970341110377	116.82	86.5	113.5	74.07	120.31	.	.	.	.	.	.	.	.	.	. Found	.	.	.	.	.	.	.	.	. Found	.	.	.	. Found	.	.	.	.	.	. Found
	High	[K].LHVAGNLK.[G]			0,0397835	0,000840285	42	P04114	Apolipoprotein B-100 OS=Homo sapiens OX=9606 GN=APOB PE=1 SV=2	P04114 [1821-1828]	0	85150976	0	1.546	0.894679135985396	108.94	87.6	112.4	105.40	104.31	.	.	.	.	.	.	. Found	. Found	. Found	.	.	.	.	.	.	.	.	.	.	.	.	. Found	. Found	. Found	.	.	.	.	.
	High	[K].LIDVISMYR.[E]			0,00462044	0,000313424	21	P04114	Apolipoprotein B-100 OS=Homo sapiens OX=9606 GN=APOB PE=1 SV=2	P04114 [4262-4270]	0	110960234	0	3.011	0.0812555581501116	111.78	35.5	164.5	83.15	71.20	.	.	. Found	. Found	.	. Found	. Found	. Found	. Found	. Found	.	.	. Found	. Found	. Found	.	. Found	.	. Found	. Found	. Found	. Found	. Found	. Found	. Found	. Found	. Found	. Found	. Found
	High	[K].LIDVISMYR.[E]	1xOxidation [M7]		0,0131955	0,000750615	22	P04114	Apolipoprotein B-100 OS=Homo sapiens OX=9606 GN=APOB PE=1 SV=2	P04114 [4262-4270]	0	112559726	0	3.743	0.0139748983320712	137.78	27.4	172.6	197.75	86.62	. Found	. Found	. Found	. Found	. Found	. Found	. Found	. Found	. Found	. Found	. Found	. Found	.	.	.	. Found	.	.	. Found	. Found	. Found	. Found	. Found	. Found	.	.	.	. Found	. Found
	High	[K].LIVAMSSWLQK.[A]	1xOxidation [M5]		0,00331406	0,000313424	51	P04114	Apolipoprotein B-100 OS=Homo sapiens OX=9606 GN=APOB PE=1 SV=2	P04114 [1230-1240]	0	129170787	0	1.315	0.991698201370085	129.34	93.2	106.8	137.24	81.67	. Found	. Found	.	. Found	. Found	.	. Found	. Found	. Found	. Found	. Found	. Found	.	.	.	.	.	.	. Found	.	.	.	.	.	.	.	. Found	.	.
	High	[K].LIVAMSSWLQK.[A]			0,00333814	0,000313424	56	P04114	Apolipoprotein B-100 OS=Homo sapiens OX=9606 GN=APOB PE=1 SV=2	P04114 [1230-1240]	0	127571296	0	1.269	0.942959420075888	114.41	113.2	86.8	54.94	104.76	.	.	.	.	.	.	. Found	. Found	. Found	.	.	.	.	.	.	.	.	.	.	.	.	. Found	. Found	. Found	. Found	. Found	.	.	. Found
	High	[K].LKFIIPSPK.[R]			0,0233515	0,000840285	26	P04114	Apolipoprotein B-100 OS=Homo sapiens OX=9606 GN=APOB PE=1 SV=2	P04114 [922-930]	1	104266593	0	1.363	0.990981590338927	112.31	85.4	114.6	75.04	97.04	.	.	.	.	.	.	. Found	. Found	. Found	.	.	. Found	.	.	. Found	.	. Found	. Found	. Found	. Found	. Found	. Found	. Found	. Found	. Found	. Found	. Found	. Found	. Found
	High	[K].LKQHIEAIDVR.[V]			0,0015277	0	4	P04114	Apolipoprotein B-100 OS=Homo sapiens OX=9606 GN=APOB PE=1 SV=2	P04114 [2285-2295]	1	132175866	0	0.375	0.00490174159830222	14.12	138.3	61.7	58.48	63.19	.	. Found	. Found	. Found	. Found	. Found	. Found	. Found	. Found	. Found	. Found	. Found	.	.	. Found	. Found	. Found	. Found	.	. Found	. Found	. Found	. Found	. Found	. Found	. Found	. Found	. Found	. Found
	High	[K].LKTQFNNNEYSQDLDAYNTK.[D]			0,000288357	0	28	P04114	Apolipoprotein B-100 OS=Homo sapiens OX=9606 GN=APOB PE=1 SV=2	P04114 [1983-2002]	1	240612081	0	1.547	0.930980694103987	88.52	79.2	120.8	78.16	59.87	.	.	. Found	.	.	.	. Found	. Found	. Found	. Found	. Found	.	.	.	.	.	.	.	. Found	. Found	. Found	. Found	. Found	. Found	. Found	.	. Found	. Found	. Found
	High	[K].LKTQFNNNEYSQDLDAYNTKDK.[I]			3,75867E-05	0	11	P04114	Apolipoprotein B-100 OS=Homo sapiens OX=9606 GN=APOB PE=1 SV=2	P04114 [1983-2004]	2	264924271	0	1.883	0.808312786040623	109.72	62.1	137.9	108.56	25.85	. Found	. Found	. Found	. Found	. Found	. Found	. Found	. Found	. Found	. Found	. Found	. Found	.	.	.	. Found	. Found	. Found	. Found	. Found	. Found	. Found	. Found	. Found	. Found	. Found	. Found	. Found	. Found
	High	[K].LLLMGAR.[T]	1xOxidation [M4]		0,178731	0,00643402	62	P04114	Apolipoprotein B-100 OS=Homo sapiens OX=9606 GN=APOB PE=1 SV=2	P04114 [798-804]	0	78946512	0	4.547	0.0226194993035897	119.66	77.8	122.2	49.57	117.68	.	.	.	.	. Found	.	. Found	. Found	. Found	.	.	.	.	. Found	. Found	.	.	.	. Found	.	. Found	. Found	. Found	. Found	. Found	.	. Found	. Found	. Found
	High	[K].LLLMGAR.[T]			0,137682	0,00472966	21	P04114	Apolipoprotein B-100 OS=Homo sapiens OX=9606 GN=APOB PE=1 SV=2	P04114 [798-804]	0	77347021	0	1.299	0.91862436360016	145.22	93.1	106.9	93.56	105.56	.	.	.	. Found	.	. Found	.	.	.	.	. Found	.	. Found	. Found	. Found	. Found	. Found	.	. Found	. Found	. Found	. Found	. Found	. Found	.	. Found	. Found	.	. Found
	High	[K].LLLQMDSSATAYGSTVSK.[R]			1,67286E-05	0	42	P04114	Apolipoprotein B-100 OS=Homo sapiens OX=9606 GN=APOB PE=1 SV=2	P04114 [1146-1163]	0	187194190	0	1.581	0.884322188652115	59.16	74.1	125.9	57.06	36.34	.	.	.	.	.	.	.	.	.	.	.	.	. Found	.	.	.	.	.	. Found	. Found	. Found	. Found	. Found	. Found	. Found	. Found	. Found	. Found	. Found
	High	[K].LLLQMDSSATAYGSTVSK.[R]	1xOxidation [M5]		1,47853E-05	0	53	P04114	Apolipoprotein B-100 OS=Homo sapiens OX=9606 GN=APOB PE=1 SV=2	P04114 [1146-1163]	0	188793682	0	2.411	0.282374764077681	130.06	73.8	126.2	132.02	116.90	.	.	.	.	.	. Found	. Found	. Found	. Found	.	.	.	.	.	.	.	.	.	.	.	.	.	.	.	.	. Found	.	.	.
	High	[K].LLLQMDSSATAYGSTVSKR.[V]	1xOxidation [M5]		2,2878E-06	0	38	P04114	Apolipoprotein B-100 OS=Homo sapiens OX=9606 GN=APOB PE=1 SV=2	P04114 [1146-1164]	1	204403793	0	3.185	0.0111393078209535	118.40	47.1	152.9	117.60	84.03	.	.	.	.	.	.	.	.	.	. Found	.	.	.	.	.	.	.	. Found	.	. Found	. Found	.	.	.	.	.	.	. Found	. Found
	High	[K].LLLQMDSSATAYGSTVSKR.[V]			7,4777E-07	0	20	P04114	Apolipoprotein B-100 OS=Homo sapiens OX=9606 GN=APOB PE=1 SV=2	P04114 [1146-1164]	1	202804302	0	1.666	0.754232296427217	82.40	76.5	123.5	65.05	41.41	.	. Found	. Found	.	.	. Found	.	.	. Found	.	. Found	.	. Found	. Found	. Found	. Found	. Found	. Found	. Found	. Found	. Found	. Found	. Found	. Found	. Found	. Found	. Found	. Found	. Found
	High	[K].LLSGGNTLHLVSTTK.[T]			2,0764E-05	0	75	P04114	Apolipoprotein B-100 OS=Homo sapiens OX=9606 GN=APOB PE=1 SV=2	P04114 [935-949]	0	154086933	0	1.793	0.321244761515801	105.62	67.2	132.8	81.99	83.27	.	.	.	.	.	.	.	.	. Found	.	.	.	.	.	.	.	.	.	.	.	.	.	.	.	. Found	. Found	. Found	.	. Found
	High	[K].LLSGGNTLHLVSTTKTEVIPPLIENR.[Q]			0,000675209	0	20	P04114	Apolipoprotein B-100 OS=Homo sapiens OX=9606 GN=APOB PE=1 SV=2	P04114 [935-960]	1	280257237	0	1.247	0.987093671297076	80.28	91.3	108.7	58.67	99.90	.	.	.	.	.	.	. Found	. Found	. Found	. Found	. Found	. Found	. Found	. Found	. Found	.	. Found	. Found	. Found	. Found	. Found	. Found	. Found	. Found	. Found	. Found	. Found	. Found	. Found
	High	[K].LNDLNSVLVMPTFHVPFTDLQVPSCK.[L]	1xCarbamidomethyl [C25]		2,34932E-05	0	77	P04114	Apolipoprotein B-100 OS=Homo sapiens OX=9606 GN=APOB PE=1 SV=2	P04114 [3737-3762]	0	297150561	0	2.881	0.101613362651445	134.46	55.9	144.1	123.94	122.56	.	.	.	.	.	. Found	. Found	.	. Found	.	.	.	. Found	. Found	.	.	.	.	. Found	.	.	.	. Found	. Found	.	. Found	.	. Found	.
	High	[K].LNDLNSVLVMPTFHVPFTDLQVPSCK.[L]	1xCarbamidomethyl [C25]; 1xOxidation [M10]		5,03107E-05	0	61	P04114	Apolipoprotein B-100 OS=Homo sapiens OX=9606 GN=APOB PE=1 SV=2	P04114 [3737-3762]	0	298750053	0	1.682	0.814568714331598	96.83	68.5	131.5	91.36	74.22	. Found	. Found	. Found	. Found	. Found	. Found	. Found	. Found	. Found	.	. Found	.	.	.	.	.	.	. Found	.	.	. Found	.	. Found	.	.	. Found	.	.	.
	High	[K].LPQQANDYLNSFNWER.[Q]			8,0842E-06	0	92	P04114	Apolipoprotein B-100 OS=Homo sapiens OX=9606 GN=APOB PE=1 SV=2	P04114 [2118-2133]	0	199493551	0	1.317	0.904825155492604	106.28	88.9	111.1	93.25	92.42	.	.	.	.	.	.	.	.	.	.	.	.	.	.	.	.	.	.	.	.	.	.	.	.	.	.	.	.	.
	High	[K].LQDFSDQLSDYYEK.[F]			0,000170609	0	63	P04114	Apolipoprotein B-100 OS=Homo sapiens OX=9606 GN=APOB PE=1 SV=2	P04114 [4499-4512]	0	175078064	0	1.556	0.92520524963809	101.06	89.5	110.5	109.81	89.67	.	.	.	.	.	.	.	. Found	. Found	. Found	.	.	.	.	.	.	.	.	.	.	.	.	.	.	.	. Found	. Found	.	.
	High	[K].LQDFSDQLSDYYEKFIAESKR.[L]			5,31492E-05	0	26	P04114	Apolipoprotein B-100 OS=Homo sapiens OX=9606 GN=APOB PE=1 SV=2	P04114 [4499-4519]	2	258224092	0	3.143	0.222444065009061	104.24	51.3	148.7	56.73	80.27	. Found	.	.	. Found	.	.	. Found	. Found	. Found	.	. Found	. Found	. Found	.	.	.	.	.	. Found	. Found	. Found	. Found	. Found	. Found	. Found	. Found	. Found	. Found	. Found
	High	[K].LQSTTVMNPYMK.[L]	2xOxidation [M7; M11]		0,00882756	0,000750615	3	P04114	Apolipoprotein B-100 OS=Homo sapiens OX=9606 GN=APOB PE=1 SV=2	P04114 [4542-4553]	0	144468106	0	1.844	0.745559913349073	87.42	65.7	134.3	75.66	45.62	. Found	. Found	. Found	. Found	. Found	. Found	. Found	. Found	. Found	. Found	. Found	. Found	. Found	. Found	.	. Found	. Found	. Found	. Found	. Found	. Found	. Found	. Found	. Found	. Found	.	. Found	. Found	. Found
	High	[K].LRLEPLKLHVAGNLK.[G]			0,000213223	0	14	P04114	Apolipoprotein B-100 OS=Homo sapiens OX=9606 GN=APOB PE=1 SV=2	P04114 [1814-1828]	2	170105339	0	2.101	0.655448333188595	113.11	65.3	134.7	121.62	72.32	. Found	. Found	. Found	. Found	. Found	. Found	. Found	. Found	. Found	. Found	. Found	. Found	.	.	.	. Found	. Found	. Found	. Found	. Found	. Found	. Found	. Found	. Found	. Found	. Found	. Found	. Found	. Found
	High	[K].LSLESLTSYFSIESSTK.[G]			5,15334E-05	0	76	P04114	Apolipoprotein B-100 OS=Homo sapiens OX=9606 GN=APOB PE=1 SV=2	P04114 [3481-3497]	0	189195352	0	2.120	0.463775657738805	121.54	77.0	123.0	101.53	101.00	.	.	.	.	.	.	. Found	.	.	.	.	.	.	.	.	.	.	. Found	.	.	.	. Found	.	.	.	.	. Found	. Found	.
	High	[K].LSLESLTSYFSIESSTKGDVK.[G]			5,21138E-06	0	47	P04114	Apolipoprotein B-100 OS=Homo sapiens OX=9606 GN=APOB PE=1 SV=2	P04114 [3481-3501]	1	229116530	0	1.619	0.812492880192187	129.11	96.7	103.3	189.72	130.38	.	.	.	.	.	.	.	.	.	.	.	.	. Found	. Found	. Found	.	.	.	.	. Found	. Found	. Found	. Found	. Found	. Found	. Found	. Found	. Found	. Found
	High	[K].LSLESLTSYFSIESSTKGDVKGSVLSR.[E]			0,194778	0,00676552	1	P04114	Apolipoprotein B-100 OS=Homo sapiens OX=9606 GN=APOB PE=1 SV=2	P04114 [3481-3507]	2	289050441	0	100.000	1.18764845605701E-16			200.0		39.03	. Found	. Found	. Found	. Found	. Found	. Found	. Found	. Found	. Found	. Found	. Found	. Found	. Found	. Found	. Found	. Found	. Found	. Found	. Found	. Found	. Found	. Found	. Found	. Found	. Found	. Found	. Found	. Found	. Found
	High	[K].LSLPDFK.[E]			0,0852393	0,00250817	57	P04114	Apolipoprotein B-100 OS=Homo sapiens OX=9606 GN=APOB PE=1 SV=2	P04114 [3315-3321]	0	81946108	0	1.473	0.764898977153759	117.65	92.2	107.8	127.77	137.81	.	. Found	. Found	.	. Found	.	.	.	.	.	.	.	.	.	.	.	.	.	.	.	.	.	.	.	.	.	.	.	.
	High	[K].LSNDMMGSYAEMK.[F]			0,00174535	0	1	P04114	Apolipoprotein B-100 OS=Homo sapiens OX=9606 GN=APOB PE=1 SV=2	P04114 [1738-1750]	0	147661675	0	2.006	0.569268491848698	48.70	75.2	124.8	56.56	26.89	. Found	. Found	. Found	. Found	. Found	. Found	. Found	. Found	. Found	. Found	. Found	. Found	. Found	. Found	. Found	. Found	.	. Found	. Found	. Found	. Found	. Found	. Found	. Found	. Found	. Found	. Found	. Found	. Found
	High	[K].LSNDMMGSYAEMK.[F]	2xOxidation [M6; M12]		0,00938924	0,000750615	25	P04114	Apolipoprotein B-100 OS=Homo sapiens OX=9606 GN=APOB PE=1 SV=2	P04114 [1738-1750]	0	150860658	0	1.916	0.66251540401374	110.60	75.0	125.0	88.75	100.13	. Found	. Found	. Found	. Found	.	. Found	. Found	. Found	. Found	.	.	.	. Found	. Found	.	.	.	.	.	.	.	. Found	. Found	. Found	.	.	.	.	.
	High	[K].LSNDMMGSYAEMK.[F]	1xOxidation [M]		0,0180385	0,000840285	5	P04114	Apolipoprotein B-100 OS=Homo sapiens OX=9606 GN=APOB PE=1 SV=2	P04114 [1738-1750]	0	149261166	0	2.277	0.478078072975202	60.66	51.9	148.1	53.19	22.37	. Found	. Found	. Found	. Found	. Found	. Found	. Found	. Found	. Found	. Found	. Found	. Found	. Found	. Found	. Found	.	.	. Found	. Found	. Found	. Found	. Found	. Found	. Found	. Found	. Found	. Found	. Found	. Found
	High	[K].LSNDMMGSYAEMKFDHTNSLNIAGLSLDFSSK.[L]	2xOxidation [M6; M]		0,000499214	0	50	P04114	Apolipoprotein B-100 OS=Homo sapiens OX=9606 GN=APOB PE=1 SV=2	P04114 [1738-1769]	1	355560765	0	1.075	0.964369058686853	103.55	100.4	99.6	49.73	82.81	. Found	. Found	. Found	. Found	. Found	. Found	. Found	. Found	. Found	.	. Found	. Found	.	.	.	. Found	.	.	.	. Found	. Found	. Found	. Found	. Found	.	.	.	. Found	. Found
	High	[K].LSNDMMGSYAEMKFDHTNSLNIAGLSLDFSSK.[L]	3xOxidation [M5; M6; M12]		0,00153843	0	16	P04114	Apolipoprotein B-100 OS=Homo sapiens OX=9606 GN=APOB PE=1 SV=2	P04114 [1738-1769]	1	357160256	0	1.965	0.751715366311807	108.54	70.0	130.0	141.31	58.93	. Found	. Found	. Found	. Found	. Found	. Found	. Found	. Found	. Found	. Found	. Found	. Found	.	.	.	.	. Found	.	. Found	.	.	. Found	. Found	. Found	. Found	.	. Found	. Found	. Found
	High	[K].LSNDMMGSYAEMKFDHTNSLNIAGLSLDFSSK.[L]	1xCarbamyl [K13]; 3xOxidation [M5; M6; M12]	P04114 1xCarbamyl [K1750]	0,0672741	0,00158954	6	P04114	Apolipoprotein B-100 OS=Homo sapiens OX=9606 GN=APOB PE=1 SV=2	P04114 [1738-1769]	1	361460837	0								. Found	. Found	. Found	. Found	. Found	. Found	. Found	. Found	. Found	. Found	. Found	. Found	. Found	. Found	. Found	.	. Found	.	. Found	. Found	. Found	. Found	. Found	. Found	. Found	. Found	. Found	. Found	. Found
	High	[K].LSNVLQQVK.[I]			0,00622263	0,000591694	25	P04114	Apolipoprotein B-100 OS=Homo sapiens OX=9606 GN=APOB PE=1 SV=2	P04114 [2377-2385]	0	102860987	0	1.601	0.879420810453675	110.90	73.7	126.3	122.44	63.73	.	.	.	.	.	.	. Found	. Found	. Found	. Found	. Found	. Found	.	.	.	. Found	. Found	. Found	.	.	.	. Found	. Found	. Found	.	.	.	. Found	. Found
	High	[K].LSQLQTYMIQFDQYIK.[D]	1xOxidation [M8]		0,000933141	0	14	P04114	Apolipoprotein B-100 OS=Homo sapiens OX=9606 GN=APOB PE=1 SV=2	P04114 [2171-2186]	0	203502049	0	0.212	0.00309576551833905	4.94	167.8	32.2	100.09	14.53	. Found	. Found	. Found	. Found	. Found	. Found	. Found	. Found	. Found	. Found	. Found	. Found	.	.	.	. Found	. Found	. Found	. Found	. Found	. Found	. Found	. Found	. Found	. Found	. Found	. Found	. Found	. Found
	High	[K].LSQLQTYMIQFDQYIKDSYDLHDLK.[I]			0,0130396	0,000750615	2	P04114	Apolipoprotein B-100 OS=Homo sapiens OX=9606 GN=APOB PE=1 SV=2	P04114 [2171-2195]	1	310552376	0								. Found	. Found	. Found	. Found	. Found	. Found	. Found	. Found	. Found	. Found	. Found	. Found	. Found	. Found	. Found	. Found	. Found	. Found	. Found	. Found	. Found	. Found	. Found	. Found	. Found	. Found	. Found	. Found	. Found
	High	[K].LTIFKTELR.[V]			0,0249548	0,000840285	7	P04114	Apolipoprotein B-100 OS=Homo sapiens OX=9606 GN=APOB PE=1 SV=2	P04114 [4036-4044]	1	112067247	0	1.737	0.749521852721323	104.88	89.2	110.8	91.66	57.46	. Found	. Found	.	. Found	. Found	. Found	. Found	. Found	. Found	. Found	. Found	. Found	. Found	. Found	. Found	. Found	. Found	. Found	. Found	. Found	. Found	. Found	. Found	. Found	. Found	. Found	. Found	. Found	. Found
	High	[K].LTISEQNIQR.[A]			0,00361545	0,000313424	82	P04114	Apolipoprotein B-100 OS=Homo sapiens OX=9606 GN=APOB PE=1 SV=2	P04114 [335-344]	0	120165353	0	1.493	0.695482867056879	108.91	93.2	106.8	80.31	94.50	.	.	.	.	.	.	.	.	.	.	.	.	.	.	.	.	.	.	.	.	.	.	.	.	.	.	.	.	.
	High	[K].LVELAHQYK.[L]			0,00504916	0,000313424	9	P04114	Apolipoprotein B-100 OS=Homo sapiens OX=9606 GN=APOB PE=1 SV=2	P04114 [2361-2369]	0	110060987	0	0.441	0.0180545094660973	22.98	113.3	86.7	130.51	76.28	. Found	. Found	. Found	. Found	. Found	. Found	. Found	. Found	. Found	. Found	. Found	. Found	.	.	.	. Found	. Found	. Found	. Found	. Found	. Found	. Found	. Found	. Found	.	. Found	. Found	. Found	. Found
	High	[K].LVGFIDDAVK.[K]			0,00896452	0,000750615	18	P04114	Apolipoprotein B-100 OS=Homo sapiens OX=9606 GN=APOB PE=1 SV=2	P04114 [2393-2402]	0	107659864	0	1.122	0.979031584670884	92.90	83.9	116.1	104.91	66.72	. Found	.	.	.	.	.	. Found	. Found	. Found	. Found	. Found	. Found	.	.	.	. Found	. Found	. Found	. Found	. Found	. Found	. Found	. Found	. Found	.	.	.	. Found	. Found
	High	[K].LVGFIDDAVKK.[L]			0,00231551	0,000313424	13	P04114	Apolipoprotein B-100 OS=Homo sapiens OX=9606 GN=APOB PE=1 SV=2	P04114 [2393-2403]	1	120469360	0	1.780	0.751715366311807	122.78	57.4	142.6	146.20	33.10	. Found	.	.	. Found	.	.	. Found	. Found	. Found	. Found	. Found	. Found	.	. Found	.	. Found	. Found	. Found	. Found	. Found	. Found	. Found	. Found	. Found	. Found	.	.	. Found	. Found
	High	[K].MDMTFSK.[Q]			0,235977	0,00864128	9	P04114	Apolipoprotein B-100 OS=Homo sapiens OX=9606 GN=APOB PE=1 SV=2	P04114 [1587-1593]	0	85936884	0	1.487	0.964810501085697	72.10	86.1	113.9	42.88	54.94	.	.	.	.	. Found	. Found	. Found	.	. Found	. Found	. Found	. Found	. Found	. Found	. Found	. Found	. Found	. Found	. Found	. Found	. Found	. Found	. Found	. Found	. Found	. Found	. Found	. Found	. Found
	High	[K].MGLAFESTK.[S]	1xOxidation [M1]		0,0293832	0,000840285	17	P04114	Apolipoprotein B-100 OS=Homo sapiens OX=9606 GN=APOB PE=1 SV=2	P04114 [306-314]	0	99948156	0	1.702	0.842903222887158	136.69	77.4	122.6	156.83	82.45	. Found	. Found	. Found	. Found	. Found	. Found	. Found	. Found	. Found	. Found	. Found	. Found	. Found	.	. Found	. Found	.	. Found	. Found	. Found	. Found	. Found	. Found	. Found	. Found	. Found	. Found	. Found	. Found
	High	[K].MGLAFESTK.[S]			0,0332249	0,000840285	39	P04114	Apolipoprotein B-100 OS=Homo sapiens OX=9606 GN=APOB PE=1 SV=2	P04114 [306-314]	0	98348664	0	1.416	0.797410215865165	109.83	89.4	110.6	73.91	100.93	.	.	.	.	.	.	.	.	.	. Found	.	.	.	.	.	. Found	.	. Found	.	. Found	.	. Found	. Found	. Found	.	.	.	.	.
	High	[K].MTSNFPVDLSDYPK.[S]	1xOxidation [M1]		0,00109396	0	8	P04114	Apolipoprotein B-100 OS=Homo sapiens OX=9606 GN=APOB PE=1 SV=2	P04114 [1189-1202]	0	162974650	0	0.256	3.39958442934161E-06	3.94	142.4	57.6	91.51	20.13	. Found	. Found	. Found	. Found	. Found	. Found	. Found	. Found	. Found	. Found	. Found	. Found	.	.	.	. Found	. Found	. Found	. Found	.	. Found	. Found	. Found	. Found	. Found	. Found	. Found	. Found	. Found
	High	[K].MTSNFPVDLSDYPK.[S]			0,000464518	0	66	P04114	Apolipoprotein B-100 OS=Homo sapiens OX=9606 GN=APOB PE=1 SV=2	P04114 [1189-1202]	0	161375158	0	2.776	0.0784408949469475	121.28	52.5	147.5	70.87	97.11	.	.	.	.	.	.	.	.	.	.	.	.	. Found	. Found	. Found	.	.	.	.	. Found	.	.	. Found	.	.	.	.	.	.
	High	[K].NDFFLHYIFMENAFELPTGAGLQLQISSSGVIAPGAK.[A]	1xOxidation [M10]		0,00316197	0,000313424	1	P04114	Apolipoprotein B-100 OS=Homo sapiens OX=9606 GN=APOB PE=1 SV=2	P04114 [823-859]	0	399899970	0								. Found	. Found	. Found	. Found	. Found	. Found	. Found	. Found	. Found	. Found	. Found	. Found	. Found	. Found	. Found	. Found	. Found	. Found	. Found	. Found	. Found	. Found	. Found	. Found	. Found	. Found	. Found	. Found	. Found
	High	[K].NFATSNKMDMTFSK.[Q]	1xOxidation [M8]		0,000532834	0	51	P04114	Apolipoprotein B-100 OS=Homo sapiens OX=9606 GN=APOB PE=1 SV=2	P04114 [1580-1593]	1	163772980	0	1.388	0.98039981659082	124.94	131.8	68.2	61.64	117.93	. Found	.	. Found	. Found	.	.	. Found	. Found	. Found	.	.	.	.	.	.	.	.	.	.	.	.	. Found	. Found	.	.	. Found	.	. Found	. Found
	High	[K].NFATSNKMDMTFSK.[Q]	2xOxidation [M8; M10]		0,00343629	0,000313424	26	P04114	Apolipoprotein B-100 OS=Homo sapiens OX=9606 GN=APOB PE=1 SV=2	P04114 [1580-1593]	1	165372472	0	0.648	0.561272484144686	53.86	114.6	85.4	133.46	99.80	. Found	. Found	. Found	. Found	. Found	. Found	. Found	. Found	. Found	. Found	. Found	. Found	.	.	.	. Found	. Found	. Found	.	.	. Found	. Found	.	.	.	.	.	.	.
	High	[K].NFVASHIANILNSEELDIQDLK.[K]			7,8116E-06	0	49	P04114	Apolipoprotein B-100 OS=Homo sapiens OX=9606 GN=APOB PE=1 SV=2	P04114 [591-612]	0	248327764	0	1.736	0.824745873201846	121.91	121.2	78.8	83.86	111.03	.	.	.	.	.	.	. Found	. Found	. Found	.	. Found	.	.	.	.	.	.	.	. Found	.	.	.	.	.	.	.	.	.	.
	High	[K].NFVASHIANILNSEELDIQDLKK.[L]			1,88492E-08	0	101	P04114	Apolipoprotein B-100 OS=Homo sapiens OX=9606 GN=APOB PE=1 SV=2	P04114 [591-613]	1	261137261	2	1.517	0.66263103844477	117.66	85.9	114.1	86.30	103.39	.	.	.	.	.	.	. Found	. Found	. Found	.	.	.	.	.	.	.	.	.	.	.	.	.	.	.	. Found	.	.	.	.
	High	[K].NHLQLEGLFFTNGEHTSK.[A]			3,25732E-06	0	89	P04114	Apolipoprotein B-100 OS=Homo sapiens OX=9606 GN=APOB PE=1 SV=2	P04114 [3569-3586]	0	207201958	0	1.297	0.987862843868136	111.52	94.1	105.9	111.65	100.84	.	.	.	.	.	.	.	.	. Found	.	.	.	.	.	.	.	.	.	.	.	.	.	.	.	.	.	.	.	.
	High	[K].NIFNFKVSQEGLK.[L]			0,0172526	0,000840285	9	P04114	Apolipoprotein B-100 OS=Homo sapiens OX=9606 GN=APOB PE=1 SV=2	P04114 [1725-1737]	1	152382165	0	3.261	0.12402727564902	63.78	46.7	153.3	49.67	53.53	. Found	. Found	. Found	. Found	. Found	. Found	. Found	. Found	. Found	. Found	. Found	. Found	.	. Found	. Found	. Found	. Found	. Found	. Found	. Found	. Found	. Found	. Found	. Found	. Found	. Found	. Found	. Found	. Found
	High	[K].NIILPVYDK.[S]			0,0419053	0,000840285	71	P04114	Apolipoprotein B-100 OS=Homo sapiens OX=9606 GN=APOB PE=1 SV=2	P04114 [3674-3682]	0	107461937	0	1.549	0.622585054881254	124.58	100.4	99.6	100.25	117.85	.	.	.	.	. Found	.	. Found	.	. Found	.	.	.	.	.	.	.	.	.	.	.	.	.	.	.	.	.	.	.	.
	High	[K].NIILPVYDKSLWDFLK.[L]			0,000110359	0	22	P04114	Apolipoprotein B-100 OS=Homo sapiens OX=9606 GN=APOB PE=1 SV=2	P04114 [3674-3689]	1	196408916	0	2.137	0.536954541859588	112.08	64.0	136.0	79.50	97.58	. Found	. Found	. Found	. Found	. Found	. Found	. Found	. Found	. Found	. Found	. Found	. Found	.	.	.	. Found	.	.	. Found	. Found	. Found	. Found	. Found	. Found	. Found	. Found	. Found	. Found	.
	High	[K].NIILPVYDKSLWDFLKLDVTTSIGR.[R]			0,000570677	0	5	P04114	Apolipoprotein B-100 OS=Homo sapiens OX=9606 GN=APOB PE=1 SV=2	P04114 [3674-3698]	2	290660261	0	3.893	0.0594764702218949	101.33	56.6	143.4	91.83	116.29	. Found	. Found	. Found	. Found	. Found	. Found	. Found	. Found	. Found	. Found	. Found	. Found	. Found	. Found	. Found	. Found	. Found	. Found	. Found	. Found	. Found	. Found	. Found	. Found	. Found	. Found	. Found	. Found	. Found
	High	[K].NIILPVYDKSLWDFLKLDVTTSIGR.[R]	1xHNE [K16]	P04114 1xHNE [K3689]	0,0168395	0,000750615	2	P04114	Apolipoprotein B-100 OS=Homo sapiens OX=9606 GN=APOB PE=1 SV=2	P04114 [3674-3698]	2	306271764	0	2.874	0.223177446280392	57.26	47.6	152.4		43.88	. Found	. Found	. Found	. Found	. Found	. Found	. Found	. Found	. Found	. Found	. Found	. Found	. Found	. Found	. Found	. Found	. Found	. Found	. Found	. Found	. Found	. Found	. Found	. Found	. Found	. Found	. Found	. Found	. Found
	High	[K].NKADYVETVLDSTCSSTVQFLEYELNVLGTHK.[I]	1xCarbamidomethyl [C14]		6,49665E-07	0	36	P04114	Apolipoprotein B-100 OS=Homo sapiens OX=9606 GN=APOB PE=1 SV=2	P04114 [3904-3935]	1	366077378	0	1.751	0.799778831317499	141.81	59.6	140.4	133.22	173.91	. Found	. Found	. Found	.	.	. Found	. Found	. Found	. Found	.	.	.	. Found	.	.	.	.	.	. Found	. Found	. Found	. Found	. Found	.	.	. Found	. Found	.	.
	High	[K].NKADYVETVLDSTCSSTVQFLEYELNVLGTHKIEDGTLASK.[T]	1xCarbamidomethyl [C14]		9,02212E-06	0	10	P04114	Apolipoprotein B-100 OS=Homo sapiens OX=9606 GN=APOB PE=1 SV=2	P04114 [3904-3944]	2	457524469	0	3.466	0.0662126040793313	107.54	40.9	159.1	105.71	83.64	. Found	. Found	. Found	. Found	. Found	. Found	. Found	. Found	. Found	. Found	. Found	. Found	. Found	. Found	. Found	.	. Found	. Found	. Found	. Found	. Found	. Found	. Found	. Found	. Found	. Found	. Found	.	.
	High	[K].NKYGMVAQVTQTLK.[L]			0,000164292	0	26	P04114	Apolipoprotein B-100 OS=Homo sapiens OX=9606 GN=APOB PE=1 SV=2	P04114 [274-287]	1	158084649	0	2.977	0.0891349814503721	60.34	47.6	152.4	35.97	38.75	.	.	. Found	.	.	.	. Found	. Found	. Found	. Found	.	. Found	.	. Found	.	.	.	.	. Found	. Found	.	. Found	. Found	. Found	. Found	. Found	. Found	. Found	.
	High	[K].NKYGMVAQVTQTLKLEDTPK.[I]			0,000268316	0	21	P04114	Apolipoprotein B-100 OS=Homo sapiens OX=9606 GN=APOB PE=1 SV=2	P04114 [274-293]	2	226419549	0	1.576	0.913105079505977	125.46	35.4	164.6	131.99	81.63	. Found	. Found	. Found	. Found	. Found	.	.	. Found	. Found	. Found	. Found	. Found	. Found	. Found	. Found	. Found	. Found	. Found	. Found	. Found	. Found	. Found	. Found	. Found	. Found	. Found	. Found	. Found	. Found
	High	[K].NLTDFAEQYSIQDWAK.[R]			6,64245E-05	0	13	P04114	Apolipoprotein B-100 OS=Homo sapiens OX=9606 GN=APOB PE=1 SV=2	P04114 [2560-2575]	0	192890248	0	1.297	0.921646688612003	104.92	95.5	104.5	68.13	86.69	. Found	. Found	. Found	. Found	.	.	. Found	. Found	. Found	. Found	. Found	. Found	.	.	.	. Found	. Found	. Found	. Found	. Found	. Found	. Found	. Found	. Found	. Found	. Found	. Found	. Found	. Found
	High	[K].NMEVSVATTTK.[A]			0,00514368	0,000313424	36	P04114	Apolipoprotein B-100 OS=Homo sapiens OX=9606 GN=APOB PE=1 SV=2	P04114 [3420-3430]	0	118058781	0	2.828	0.014519774679159	114.89	79.3	120.7	62.61	98.94	.	.	.	.	.	.	.	.	.	.	.	.	. Found	. Found	.	.	.	.	.	.	. Found	. Found	. Found	. Found	. Found	. Found	. Found	. Found	. Found
	High	[K].NMEVSVATTTK.[A]	1xOxidation [M2]		0,00836555	0,000750615	24	P04114	Apolipoprotein B-100 OS=Homo sapiens OX=9606 GN=APOB PE=1 SV=2	P04114 [3420-3430]	0	119658273	0	2.387	0.299781415195575	124.01	48.7	151.3	141.40	54.81	. Found	. Found	. Found	. Found	. Found	. Found	. Found	. Found	. Found	. Found	. Found	. Found	.	.	.	. Found	. Found	. Found	.	.	.	. Found	. Found	. Found	.	.	.	.	. Found
	High	[K].NPNGYSFSIPVK.[V]			0,0146327	0,000750615	34	P04114	Apolipoprotein B-100 OS=Homo sapiens OX=9606 GN=APOB PE=1 SV=2	P04114 [3713-3724]	0	132267393	0	1.708	0.417111791605247	109.03	102.7	97.3	79.48	101.08	.	.	.	.	.	.	. Found	. Found	.	. Found	. Found	.	.	. Found	.	. Found	. Found	.	.	.	. Found	. Found	.	. Found	.	.	.	.	.
	High	[K].NQDVHSINLPFFETLQEYFER.[N]			5,2605E-05	0	30	P04114	Apolipoprotein B-100 OS=Homo sapiens OX=9606 GN=APOB PE=1 SV=2	P04114 [2063-2083]	0	262625724	0	3.527	0.103158185074059	117.23	44.7	155.3	108.09	141.02	. Found	. Found	. Found	. Found	. Found	. Found	. Found	. Found	. Found	.	.	.	.	.	.	.	.	.	. Found	. Found	. Found	. Found	. Found	. Found	.	. Found	.	.	.
	High	[K].NRNNALDFVTK.[S]			0,0116772	0,000750615	55	P04114	Apolipoprotein B-100 OS=Homo sapiens OX=9606 GN=APOB PE=1 SV=2	P04114 [3211-3221]	1	129167532	0	1.270	0.999209963067217	97.28	92.9	107.1	58.66	74.89	.	.	.	.	.	.	. Found	. Found	. Found	.	.	.	.	.	.	.	.	.	.	. Found	. Found	.	.	. Found	. Found	. Found	. Found	. Found	. Found
	High	[K].NSEEFAAAMSR.[Y]			0,00162706	0	77	P04114	Apolipoprotein B-100 OS=Homo sapiens OX=9606 GN=APOB PE=1 SV=2	P04114 [118-128]	0	121253136	0	1.354	0.864403460667438	109.90	84.1	115.9	77.03	104.22	.	.	.	.	.	.	.	.	.	.	.	.	.	.	.	.	.	.	.	.	.	.	.	.	.	.	.	.	.
	High	[K].NSEEFAAAMSR.[Y]	1xOxidation [M9]		0,0108826	0,000750615	31	P04114	Apolipoprotein B-100 OS=Homo sapiens OX=9606 GN=APOB PE=1 SV=2	P04114 [118-128]	0	122852628	0	0.863	0.704918628203708	94.61	93.7	106.3	130.52	75.37	. Found	. Found	. Found	. Found	. Found	. Found	. Found	. Found	. Found	. Found	. Found	. Found	.	.	.	. Found	. Found	.	.	.	.	.	.	.	. Found	. Found	. Found	.	.
	High	[K].NSLFFSAQPFEITASTNNEGNLK.[V]			1,42997E-06	0	54	P04114	Apolipoprotein B-100 OS=Homo sapiens OX=9606 GN=APOB PE=1 SV=2	P04114 [3035-3057]	0	252922561	0	1.838	0.656784762382137	115.69	74.8	125.2	91.88	97.09	.	. Found	.	.	.	. Found	. Found	. Found	. Found	.	.	.	.	.	.	.	.	.	.	.	.	. Found	. Found	. Found	. Found	.	.	. Found	. Found
	High	[K].NSLFFSAQPFEITASTNNEGNLKVR.[F]			0,000256614	0	7	P04114	Apolipoprotein B-100 OS=Homo sapiens OX=9606 GN=APOB PE=1 SV=2	P04114 [3035-3059]	1	278439513	0	100.000	1.18764845605701E-16			200.0		26.96	. Found	. Found	. Found	. Found	. Found	. Found	. Found	. Found	. Found	. Found	. Found	. Found	. Found	. Found	. Found	. Found	. Found	. Found	. Found	. Found	. Found	. Found	. Found	. Found	. Found	. Found	. Found	. Found	. Found
	High	[K].NTASLKYENYELTLK.[S]			1,32029E-05	0	38	P04114	Apolipoprotein B-100 OS=Homo sapiens OX=9606 GN=APOB PE=1 SV=2	P04114 [1557-1571]	1	178692216	0	1.897	0.497785785642515	121.68	77.1	122.9	121.77	84.86	.	.	.	.	.	.	.	.	. Found	. Found	.	.	.	. Found	.	.	.	. Found	. Found	.	.	. Found	. Found	. Found	.	.	.	.	.
	High	[K].NTLELSNGVIVK.[I]			0,00365511	0,000313424	52	P04114	Apolipoprotein B-100 OS=Homo sapiens OX=9606 GN=APOB PE=1 SV=2	P04114 [2865-2876]	0	128673144	0	1.720	0.778042242843053	111.20	78.5	121.5	128.26	91.24	.	.	.	.	.	.	.	.	.	.	.	.	.	.	.	.	.	.	.	.	.	.	.	.	.	.	.	.	.
	High	[K].QGFFPDSVNK.[A]			0,00886159	0,000750615	114	P04114	Apolipoprotein B-100 OS=Homo sapiens OX=9606 GN=APOB PE=1 SV=2	P04114 [708-717]	0	113855275	0	1.417	0.796321932816189	103.70	88.5	111.5	80.58	83.81	.	.	.	.	.	.	.	.	.	.	.	.	.	.	.	.	.	.	.	.	.	.	.	.	.	.	.	.	.
	High	[K].QHIEAIDVR.[V]			0,0332249	0,000840285	25	P04114	Apolipoprotein B-100 OS=Homo sapiens OX=9606 GN=APOB PE=1 SV=2	P04114 [2287-2295]	0	108057963	0	1.454	0.953537638200151	89.24	79.8	120.2	86.97	70.61	.	. Found	. Found	.	. Found	. Found	. Found	. Found	. Found	. Found	. Found	. Found	.	.	.	. Found	. Found	.	.	. Found	.	. Found	. Found	. Found	. Found	. Found	. Found	. Found	. Found
	High	[K].QSFDLSVK.[A]			0,116612	0,00369184	51	P04114	Apolipoprotein B-100 OS=Homo sapiens OX=9606 GN=APOB PE=1 SV=2	P04114 [3167-3174]	0	92348327	0	1.640	0.498877082024319	110.87	93.9	106.1	92.25	83.27	.	.	.	.	.	.	.	.	.	.	.	.	.	.	.	.	.	.	.	.	.	.	.	.	.	.	.	.	.
	High	[K].QTEATMTFK.[Y]			0,0473477	0,000840285	41	P04114	Apolipoprotein B-100 OS=Homo sapiens OX=9606 GN=APOB PE=1 SV=2	P04114 [1044-1052]	0	105650302	0	1.518	0.662063955956838	112.53	105.7	94.3	56.79	103.05	.	.	.	.	.	.	. Found	. Found	. Found	.	.	.	.	.	.	.	.	.	.	.	.	. Found	.	.	.	.	.	.	.
	High	[K].QTEATMTFK.[Y]	1xOxidation [M6]		0,0550065	0,00122162	17	P04114	Apolipoprotein B-100 OS=Homo sapiens OX=9606 GN=APOB PE=1 SV=2	P04114 [1044-1052]	0	107249794	0	0.413	0.0174158101804579	16.66	142.3	57.7	91.58	55.55	. Found	. Found	. Found	. Found	. Found	. Found	. Found	. Found	. Found	. Found	. Found	. Found	.	.	.	. Found	. Found	. Found	.	.	.	. Found	. Found	. Found	. Found	. Found	. Found	. Found	.
	High	[K].QTVNLQLQPYSLVTTLNSDLK.[Y]			1,07839E-05	0	110	P04114	Apolipoprotein B-100 OS=Homo sapiens OX=9606 GN=APOB PE=1 SV=2	P04114 [1782-1802]	0	237528167	0	1.891	0.625885266945397	124.35	75.1	124.9	112.39	94.59	.	.	.	.	.	.	.	.	.	.	.	. Found	.	.	.	.	.	.	.	.	.	.	.	.	.	.	.	.	.
	High	[K].QTVNLQLQPYSLVTTLNSDLKYNALDLTNNGK.[L]			1,47987E-06	0	27	P04114	Apolipoprotein B-100 OS=Homo sapiens OX=9606 GN=APOB PE=1 SV=2	P04114 [1782-1813]	1	357887007	0	1.991	0.716607128649613	129.76	90.2	109.8	110.65	115.58	. Found	.	. Found	.	.	.	. Found	. Found	. Found	.	.	.	.	.	. Found	.	.	.	. Found	. Found	. Found	. Found	.	. Found	. Found	. Found	.	. Found	. Found
	High	[K].QVFLYPEKDEPTYILNIK.[R]			5,17105E-05	0	118	P04114	Apolipoprotein B-100 OS=Homo sapiens OX=9606 GN=APOB PE=1 SV=2	P04114 [140-157]	1	221017435	0	1.327	0.893007473132485	105.49	91.7	108.3	76.56	91.13	.	.	.	.	.	.	.	.	.	.	.	.	.	.	.	.	.	.	.	.	.	.	.	.	.	.	.	.	.
	High	[K].QVFLYPEKDEPTYILNIK.[R]	1xHNE [K8]	P04114 1xHNE [K147]	0,0235457	0,000840285	11	P04114	Apolipoprotein B-100 OS=Homo sapiens OX=9606 GN=APOB PE=1 SV=2	P04114 [140-157]	1	236628938	0								. Found	. Found	. Found	. Found	. Found	. Found	. Found	. Found	. Found	. Found	.	. Found	.	.	. Found	. Found	. Found	.	. Found	. Found	. Found	. Found	. Found	. Found	. Found	. Found	. Found	. Found	. Found
	High	[K].QVFLYPEKDEPTYILNIKR.[G]			2,6856E-05	0	42	P04114	Apolipoprotein B-100 OS=Homo sapiens OX=9606 GN=APOB PE=1 SV=2	P04114 [140-158]	2	236627546	4	2.147	0.301809671426494	103.28	68.5	131.5	74.46	71.81	. Found	. Found	.	.	.	.	.	. Found	. Found	.	.	.	.	.	.	.	.	. Found	.	. Found	. Found	. Found	.	. Found	. Found	. Found	. Found	. Found	.
	High	[K].RGIISALLVPPETEEAK.[Q]			0,000955961	0	64	P04114	Apolipoprotein B-100 OS=Homo sapiens OX=9606 GN=APOB PE=1 SV=2	P04114 [158-174]	1	182302729	0	1.467	0.965103206330036	102.92	82.5	117.5	71.45	104.13	.	.	.	.	.	.	.	. Found	.	.	.	.	.	.	.	.	.	.	. Found	. Found	.	. Found	.	.	.	. Found	.	.	.
	High	[K].RHIQNIDIQHLAGK.[L]			0,000131007	0	6	P04114	Apolipoprotein B-100 OS=Homo sapiens OX=9606 GN=APOB PE=1 SV=2	P04114 [2271-2284]	1	164291360	0	0.591	0.497012260943469	15.61	140.6	59.4		51.80	. Found	. Found	. Found	. Found	. Found	. Found	. Found	. Found	. Found	. Found	. Found	. Found	.	. Found	.	. Found	. Found	. Found	. Found	. Found	. Found	. Found	. Found	. Found	. Found	.	. Found	. Found	. Found
	High	[K].RLAAYLMLMR.[S]			0,125553	0,00422816	24	P04114	Apolipoprotein B-100 OS=Homo sapiens OX=9606 GN=APOB PE=1 SV=2	P04114 [558-567]	1	123769078	0	0.483	0.341969959641762	21.18	141.7	58.3	53.98	89.69	. Found	. Found	. Found	. Found	. Found	. Found	. Found	. Found	. Found	.	.	.	.	.	.	.	.	.	. Found	. Found	. Found	. Found	. Found	. Found	. Found	. Found	. Found	.	.
	High	[K].RVHANPLLIDVVTYLVALIPEPSAQQLR.[E]			0,000155518	0	4	P04114	Apolipoprotein B-100 OS=Homo sapiens OX=9606 GN=APOB PE=1 SV=2	P04114 [400-427]	1	312578336	0	4.557	0.0213200248119494	126.65	46.8	153.2	90.17	159.12	. Found	. Found	. Found	. Found	. Found	. Found	. Found	. Found	. Found	. Found	. Found	. Found	. Found	. Found	. Found	. Found	. Found	. Found	. Found	. Found	. Found	. Found	. Found	. Found	. Found	. Found	. Found	. Found	. Found
	High	[K].SFDRHFEK.[N]			0,0646018	0,00141145	25	P04114	Apolipoprotein B-100 OS=Homo sapiens OX=9606 GN=APOB PE=1 SV=2	P04114 [3203-3210]	1	106551122	0	1.993	0.577013368209855	118.40	67.1	132.9	130.97	101.83	.	. Found	. Found	.	.	.	. Found	.	. Found	. Found	.	.	. Found	.	. Found	.	. Found	.	. Found	. Found	.	. Found	. Found	. Found	.	. Found	. Found	. Found	. Found
	High	[K].SFDYHQFVDETNDK.[I]			0,00162137	0	35	P04114	Apolipoprotein B-100 OS=Homo sapiens OX=9606 GN=APOB PE=1 SV=2	P04114 [2429-2442]	0	174474492	0	1.242	0.988269405054749	95.22	89.0	111.0	99.42	70.58	.	.	.	.	.	. Found	. Found	. Found	. Found	.	.	. Found	.	.	.	.	.	.	.	.	.	. Found	. Found	. Found	.	.	.	. Found	. Found
	High	[K].SFDYHQFVDETNDKIR.[E]			7,52234E-06	0	96	P04114	Apolipoprotein B-100 OS=Homo sapiens OX=9606 GN=APOB PE=1 SV=2	P04114 [2429-2444]	1	201393009	0	1.895	0.616349883022222	111.73	74.3	125.7	128.35	78.77	.	.	.	.	.	.	.	.	.	.	.	.	.	.	.	.	.	.	.	.	.	. Found	. Found	. Found	.	.	.	.	.
	High	[K].SGSSTASWIQNVDTK.[Y]			0,000357918	0	50	P04114	Apolipoprotein B-100 OS=Homo sapiens OX=9606 GN=APOB PE=1 SV=2	P04114 [2241-2255]	0	158075509	0	1.262	0.999209963067217	121.52	106.1	93.9	127.75	101.64	.	.	.	.	.	.	.	.	.	.	.	.	.	.	.	.	.	.	.	. Found	. Found	.	.	.	.	.	.	.	.
	High	[K].SGSSTASWIQNVDTKYQIR.[I]			7,67179E-05	0	14	P04114	Apolipoprotein B-100 OS=Homo sapiens OX=9606 GN=APOB PE=1 SV=2	P04114 [2241-2259]	1	214106217	0	0.956	0.913105079505977	108.07	95.1	104.9	138.69	43.08	. Found	. Found	. Found	. Found	. Found	. Found	. Found	. Found	. Found	.	. Found	.	. Found	. Found	.	.	.	.	. Found	. Found	. Found	. Found	. Found	. Found	. Found	. Found	. Found	. Found	. Found
	High	[K].SHDELPR.[T]			0,182832	0,00643402	10	P04114	Apolipoprotein B-100 OS=Homo sapiens OX=9606 GN=APOB PE=1 SV=2	P04114 [3238-3244]	0	85341626	0	1.401	0.915538850722107	120.26	104.9	95.1	59.05	110.75	. Found	. Found	. Found	. Found	. Found	. Found	. Found	. Found	. Found	. Found	. Found	.	. Found	. Found	.	. Found	. Found	.	.	. Found	. Found	. Found	. Found	. Found	. Found	. Found	. Found	. Found	. Found
	High	[K].SISAALEHK.[V]			0,0176766	0,000840285	70	P04114	Apolipoprotein B-100 OS=Homo sapiens OX=9606 GN=APOB PE=1 SV=2	P04114 [1959-1967]	0	95552072	0	1.350	0.870013900485371	107.36	84.8	115.2	101.52	87.03	.	.	.	.	.	.	. Found	. Found	. Found	.	.	.	.	.	.	.	.	.	.	.	.	.	.	.	.	.	.	.	.
	High	[K].SISAALEHKVSALLTPAEQTGTWK.[L]			0,0183338	0,000840285	8	P04114	Apolipoprotein B-100 OS=Homo sapiens OX=9606 GN=APOB PE=1 SV=2	P04114 [1959-1982]	1	253835623	0	2.090	0.573372391369518	59.44	73.0	127.0		66.13	. Found	. Found	. Found	. Found	. Found	. Found	. Found	. Found	. Found	. Found	. Found	. Found	. Found	. Found	. Found	. Found	. Found	. Found	. Found	. Found	. Found	. Found	. Found	. Found	. Found	. Found	. Found	. Found	. Found
	High	[K].SKPTVSSSMEFK.[Y]			0,00814431	0,000750615	33	P04114	Apolipoprotein B-100 OS=Homo sapiens OX=9606 GN=APOB PE=1 SV=2	P04114 [3450-3461]	0	132765623	0	6.310	0.000248013837976385	136.56	48.1	151.9	124.87	101.23	. Found	. Found	. Found	. Found	. Found	. Found	. Found	. Found	. Found	. Found	.	. Found	. Found	. Found	. Found	.	.	.	. Found	. Found	. Found	. Found	. Found	. Found	. Found	. Found	. Found	. Found	. Found
	High	[K].SKPTVSSSMEFK.[Y]	1xOxidation [M9]		0,00403341	0,000313424	39	P04114	Apolipoprotein B-100 OS=Homo sapiens OX=9606 GN=APOB PE=1 SV=2	P04114 [3450-3461]	0	134365114	0	1.534	0.92520524963809	120.06	62.0	138.0	126.88	78.77	. Found	. Found	. Found	. Found	. Found	. Found	. Found	. Found	. Found	. Found	. Found	. Found	. Found	.	.	.	. Found	.	. Found	.	.	. Found	. Found	. Found	.	.	.	. Found	.
	High	[K].SLDEHYHIR.[V]			0,00924532	0,000750615	5	P04114	Apolipoprotein B-100 OS=Homo sapiens OX=9606 GN=APOB PE=1 SV=2	P04114 [2211-2219]	0	116956980	0	1.252	0.999209963067217	116.24	82.1	117.9	120.83	105.47	. Found	. Found	. Found	. Found	. Found	. Found	. Found	. Found	. Found	. Found	. Found	. Found	. Found	. Found	.	. Found	. Found	. Found	. Found	. Found	. Found	. Found	. Found	. Found	. Found	. Found	. Found	. Found	. Found
	High	[K].SLHMYANR.[L]			0,049691	0,000840285	63	P04114	Apolipoprotein B-100 OS=Homo sapiens OX=9606 GN=APOB PE=1 SV=2	P04114 [1203-1210]	0	99147781	0	1.759	0.358753366647609	96.37	82.6	117.4	67.93	85.81	.	.	.	.	.	.	.	. Found	. Found	.	.	.	.	. Found	. Found	.	.	.	. Found	.	. Found	. Found	. Found	. Found	. Found	. Found	. Found	. Found	. Found
	High	[K].SLHMYANR.[L]	1xOxidation [M4]		0,180361	0,00643402	32	P04114	Apolipoprotein B-100 OS=Homo sapiens OX=9606 GN=APOB PE=1 SV=2	P04114 [1203-1210]	0	100747273	0	1.426	0.961761386132035	122.36	87.4	112.6	71.72	168.61	. Found	. Found	. Found	. Found	. Found	. Found	. Found	. Found	. Found	. Found	.	. Found	.	.	.	. Found	.	.	. Found	.	. Found	.	. Found	.	.	.	.	.	.
	High	[K].SLWDFLK.[L]			0,0992126	0,00302604	98	P04114	Apolipoprotein B-100 OS=Homo sapiens OX=9606 GN=APOB PE=1 SV=2	P04114 [3683-3689]	0	90848763	0	1.788	0.326554085615872	117.73	87.3	112.7	82.62	116.35	.	.	.	.	.	.	.	.	.	.	.	.	.	.	.	.	.	.	.	.	.	.	.	.	.	.	.	.	.
	High	[K].SLWDFLKLDVTTSIGR.[R]			0,000144709	0	14	P04114	Apolipoprotein B-100 OS=Homo sapiens OX=9606 GN=APOB PE=1 SV=2	P04114 [3683-3698]	1	185100107	0	1.701	0.812492880192187	86.36	76.5	123.5	61.35	100.56	. Found	. Found	. Found	. Found	. Found	.	. Found	. Found	. Found	.	.	.	. Found	.	. Found	.	.	.	. Found	. Found	. Found	. Found	. Found	. Found	. Found	. Found	. Found	. Found	. Found
	High	[K].SLWDFLKLDVTTSIGRR.[Q]			0,00239084	0,000313424	18	P04114	Apolipoprotein B-100 OS=Homo sapiens OX=9606 GN=APOB PE=1 SV=2	P04114 [3683-3699]	2	200710219	0	2.421	0.425208476189111	93.50	72.9	127.1	14.82	77.02	. Found	. Found	. Found	. Found	. Found	. Found	. Found	. Found	. Found	. Found	. Found	. Found	. Found	.	.	. Found	.	. Found	. Found	. Found	. Found	. Found	. Found	. Found	. Found	. Found	. Found	. Found	. Found
	High	[K].SNTVASLHTEK.[N]			0,0111845	0,000750615	5	P04114	Apolipoprotein B-100 OS=Homo sapiens OX=9606 GN=APOB PE=1 SV=2	P04114 [2854-2864]	0	118660624	0	1.871	0.653606942901995	121.63	75.1	124.9	79.44	127.21	. Found	. Found	. Found	. Found	. Found	. Found	. Found	. Found	. Found	. Found	. Found	. Found	. Found	. Found	. Found	. Found	. Found	. Found	.	. Found	.	. Found	. Found	. Found	. Found	. Found	. Found	. Found	. Found
	High	[K].SPAFTDLHLR.[Y]			0,000319612	0	135	P04114	Apolipoprotein B-100 OS=Homo sapiens OX=9606 GN=APOB PE=1 SV=2	P04114 [3980-3989]	0	115661093	0	1.446	0.759409643503244	113.55	87.5	112.5	103.78	89.80	.	.	.	.	.	.	.	.	.	.	.	.	.	.	.	.	.	.	.	.	.	.	.	.	.	.	.	.	.
	High	[K].STSPPKQAEAVLK.[T]			0,017183	0,000750615	16	P04114	Apolipoprotein B-100 OS=Homo sapiens OX=9606 GN=APOB PE=1 SV=2	P04114 [315-327]	1	135575291	0	1.219	0.999209963067217	104.34	77.2	122.8	82.75	107.73	.	.	.	.	.	.	. Found	. Found	. Found	. Found	. Found	. Found	. Found	.	. Found	. Found	. Found	. Found	. Found	. Found	. Found	. Found	. Found	. Found	. Found	. Found	. Found	. Found	. Found
	High	[K].SVGFHLPSR.[E]			0,0285297	0,000840285	98	P04114	Apolipoprotein B-100 OS=Homo sapiens OX=9606 GN=APOB PE=1 SV=2	P04114 [1325-1333]	0	99953704	0	1.634	0.503796916434224	106.10	80.5	119.5	85.02	87.22	.	.	.	.	.	.	.	.	.	.	.	.	.	.	.	.	.	.	.	.	.	.	.	.	.	.	.	.	.
	High	[K].SVGFHLPSREFQVPTFTIPK.[L]			0,0142867	0,000750615	15	P04114	Apolipoprotein B-100 OS=Homo sapiens OX=9606 GN=APOB PE=1 SV=2	P04114 [1325-1344]	1	228722336	0	1.494	0.909863605903733	84.64	79.8	120.2	53.06	81.69	.	. Found	.	. Found	.	.	. Found	. Found	. Found	.	. Found	. Found	. Found	. Found	. Found	. Found	. Found	. Found	. Found	. Found	. Found	. Found	. Found	. Found	. Found	. Found	. Found	. Found	. Found
	High	[K].SVSDGIAALDLNAVANK.[I]			3,22104E-05	0	160	P04114	Apolipoprotein B-100 OS=Homo sapiens OX=9606 GN=APOB PE=1 SV=2	P04114 [3830-3846]	0	165787554	0	1.597	0.555450755440377	108.42	81.5	118.5	96.44	91.94	.	.	.	.	.	.	.	.	.	.	.	.	.	.	.	.	.	.	.	.	.	.	.	.	.	.	.	.	.
	High	[K].SVSLPSLDPASAK.[I]			0,00379065	0,000313424	27	P04114	Apolipoprotein B-100 OS=Homo sapiens OX=9606 GN=APOB PE=1 SV=2	P04114 [642-654]	0	127168416	0	1.402	0.81407802949728	113.05	83.1	116.9	90.40	97.05	.	. Found	.	. Found	. Found	. Found	. Found	. Found	. Found	.	.	.	.	. Found	.	.	.	. Found	.	. Found	. Found	. Found	. Found	. Found	. Found	. Found	. Found	. Found	. Found
	High	[K].TEVIPPLIENR.[Q]			0,000636921	0	118	P04114	Apolipoprotein B-100 OS=Homo sapiens OX=9606 GN=APOB PE=1 SV=2	P04114 [950-960]	0	128072088	0	1.401	0.814568714331598	102.04	93.1	106.9	81.83	88.13	.	.	.	.	.	.	.	.	.	.	.	.	.	.	.	.	.	.	.	.	.	.	.	.	.	.	.	.	.
	High	[K].TGLKEFLK.[T]			0,0184084	0,000840285	97	P04114	Apolipoprotein B-100 OS=Homo sapiens OX=9606 GN=APOB PE=1 SV=2	P04114 [3156-3163]	1	93555604	0	1.802	0.313551031848998	113.36	77.6	122.4	115.07	92.06	.	.	.	.	.	.	.	.	.	.	.	.	.	.	.	.	.	.	.	.	.	.	.	.	.	.	.	.	.
	High	[K].TIHDLHLFIENIDFNK.[S]			2,12151E-06	0	174	P04114	Apolipoprotein B-100 OS=Homo sapiens OX=9606 GN=APOB PE=1 SV=2	P04114 [2225-2240]	0	196901779	0	1.705	0.419965487089953	116.67	91.6	108.4	84.69	84.38	.	.	.	.	.	.	.	.	.	.	.	.	.	.	.	.	.	.	.	.	.	.	.	.	.	.	.	.	.
	High	[K].TILGTMPAFEVSLQALQK.[A]			4,71364E-05	0	94	P04114	Apolipoprotein B-100 OS=Homo sapiens OX=9606 GN=APOB PE=1 SV=2	P04114 [2592-2609]	0	194706196	0	1.888	0.234235742673623	134.52	64.4	135.6	88.31	90.76	.	.	.	.	.	.	.	.	.	.	.	.	.	.	.	.	. Found	.	. Found	.	.	. Found	. Found	. Found	.	.	.	.	.
	High	[K].TILGTMPAFEVSLQALQK.[A]	1xOxidation [M6]		3,49744E-05	0	100	P04114	Apolipoprotein B-100 OS=Homo sapiens OX=9606 GN=APOB PE=1 SV=2	P04114 [2592-2609]	0	196305688	0	2.123	0.132916230062062	117.93	51.9	148.1	131.47	59.00	.	.	.	.	.	.	. Found	. Found	. Found	.	.	.	.	.	.	.	.	.	.	.	.	.	.	.	.	. Found	.	.	.
	High	[K].TKGTFAHR.[D]			0,00512462	0,000313424	32	P04114	Apolipoprotein B-100 OS=Homo sapiens OX=9606 GN=APOB PE=1 SV=2	P04114 [3945-3952]	1	91749518	0	1.927	0.648401622186599	108.49	83.9	116.1	74.44	91.29	. Found	. Found	.	.	.	. Found	. Found	. Found	. Found	.	.	.	.	.	. Found	.	.	.	.	.	. Found	.	.	.	. Found	. Found	.	.	.
	High	[K].TKNSEEFAAAMSR.[Y]	1xOxidation [M11]		0,00358926	0,000313424	9	P04114	Apolipoprotein B-100 OS=Homo sapiens OX=9606 GN=APOB PE=1 SV=2	P04114 [116-128]	1	145766892	0	3.193	0.186829076475421	84.74	41.7	158.3	59.08	65.63	. Found	. Found	. Found	. Found	. Found	. Found	. Found	. Found	. Found	. Found	. Found	. Found	. Found	.	.	. Found	. Found	. Found	.	.	. Found	.	.	.	. Found	. Found	. Found	. Found	. Found
	High	[K].TKNSEEFAAAMSR.[Y]			0,000302543	0	61	P04114	Apolipoprotein B-100 OS=Homo sapiens OX=9606 GN=APOB PE=1 SV=2	P04114 [116-128]	1	144167400	0	0.988	0.953537638200151	84.04	107.7	92.3	52.66	87.06	.	.	.	.	.	.	. Found	. Found	.	.	.	.	.	.	.	.	.	.	. Found	.	. Found	. Found	. Found	. Found	. Found	. Found	. Found	.	. Found
	High	[K].TLQELKK.[L]			0,239117	0,00929554	16	P04114	Apolipoprotein B-100 OS=Homo sapiens OX=9606 GN=APOB PE=1 SV=2	P04114 [328-334]	1	85952474	0	1.303	0.990981590338927	126.12	89.6	110.4	82.17	121.99	.	. Found	. Found	. Found	. Found	. Found	. Found	. Found	. Found	.	. Found	. Found	. Found	. Found	.	. Found	. Found	.	. Found	.	.	. Found	. Found	. Found	.	. Found	. Found	. Found	. Found
	High	[K].TQFNNNEYSQDLDAYNTK.[D]			1,2714E-05	0	96	P04114	Apolipoprotein B-100 OS=Homo sapiens OX=9606 GN=APOB PE=1 SV=2	P04114 [1985-2002]	0	216494178	0	1.459	0.956945792285354	115.80	97.4	102.6	122.34	92.51	.	.	.	.	.	.	.	.	.	.	.	.	.	.	.	.	.	.	.	.	.	.	.	.	.	.	.	.	.
	High	[K].TQFNNNEYSQDLDAYNTKDK.[I]			3,0595E-05	0	34	P04114	Apolipoprotein B-100 OS=Homo sapiens OX=9606 GN=APOB PE=1 SV=2	P04114 [1985-2004]	1	240806369	0	1.760	0.831887046469336	112.35	94.6	105.4	99.64	101.21	.	. Found	.	.	.	.	. Found	. Found	. Found	.	.	. Found	.	.	.	.	.	.	.	. Found	.	. Found	. Found	. Found	.	.	.	. Found	.
	High	[K].TQFNNNEYSQDLDAYNTKDKIGVELTGR.[T]			2,78887E-05	0	23	P04114	Apolipoprotein B-100 OS=Homo sapiens OX=9606 GN=APOB PE=1 SV=2	P04114 [1985-2012]	2	323353454	0	2.887	0.097376096574801	50.76	50.9	149.1	41.38	80.21	. Found	. Found	. Found	. Found	. Found	. Found	. Found	. Found	. Found	. Found	.	. Found	. Found	.	.	.	.	.	. Found	. Found	. Found	. Found	. Found	. Found	. Found	. Found	. Found	. Found	. Found
	High	[K].TSQCTLK.[E]	1xCarbamidomethyl [C4]		0,144831	0,00505334	3	P04114	Apolipoprotein B-100 OS=Homo sapiens OX=9606 GN=APOB PE=1 SV=2	P04114 [94-100]	0	83741348	0	3.929	0.0320266065972989	107.48	50.3	149.7	59.63	119.07	. Found	. Found	. Found	. Found	. Found	. Found	. Found	. Found	. Found	. Found	. Found	. Found	. Found	. Found	. Found	. Found	. Found	. Found	. Found	. Found	. Found	. Found	. Found	. Found	. Found	. Found	. Found	. Found	. Found
	High	[K].TSQCTLKEVYGFNPEGK.[A]	1xCarbamidomethyl [C4]		9,52247E-05	0	12	P04114	Apolipoprotein B-100 OS=Homo sapiens OX=9606 GN=APOB PE=1 SV=2	P04114 [94-110]	1	195793240	0	0.949	0.977134742088879	60.33	108.3	91.7	47.74	96.59	.	.	.	. Found	.	. Found	. Found	. Found	. Found	. Found	. Found	. Found	. Found	. Found	. Found	. Found	. Found	. Found	. Found	. Found	. Found	. Found	. Found	. Found	. Found	. Found	. Found	. Found	. Found
	High	[K].TTLTAFGFASADLIEIGLEGK.[G]			6,49075E-06	0	187	P04114	Apolipoprotein B-100 OS=Homo sapiens OX=9606 GN=APOB PE=1 SV=2	P04114 [675-695]	0	215413288	0	1.560	0.840193922909314	133.78	56.6	143.4	100.52	115.61	.	.	.	.	.	.	.	.	.	.	.	.	.	.	.	.	.	.	. Found	.	.	.	.	.	.	.	.	.	.
	High	[K].VEDIPLAR.[I]			0,0417239	0,000840285	49	P04114	Apolipoprotein B-100 OS=Homo sapiens OX=9606 GN=APOB PE=1 SV=2	P04114 [2698-2705]	0	91251491	0	1.485	0.9500492592737	111.38	80.4	119.6	93.47	100.64	.	.	.	.	.	.	.	. Found	.	.	.	.	.	.	.	.	.	.	.	.	.	.	.	.	. Found	.	.	.	.
	High	[K].VELEVPQLCSFILK.[T]	1xCarbamidomethyl [C9]		0,000580552	0	118	P04114	Apolipoprotein B-100 OS=Homo sapiens OX=9606 GN=APOB PE=1 SV=2	P04114 [80-93]	0	167491351	0	2.039	0.141393186040647	113.42	75.5	124.5	88.48	101.62	.	.	.	.	.	.	. Found	.	.	.	.	.	.	.	.	.	.	.	.	.	.	.	.	.	.	.	.	.	.
	High	[K].VHELIERYEVDQQIQVLMDK.[L]	1xOxidation [M18]		0,00545898	0,000313424	3	P04114	Apolipoprotein B-100 OS=Homo sapiens OX=9606 GN=APOB PE=1 SV=2	P04114 [2341-2360]	1	250127045	0	0.382	0.130225919003994	2.71	144.7	55.3			. Found	. Found	. Found	. Found	. Found	. Found	. Found	. Found	. Found	. Found	. Found	. Found	.	. Found	. Found	. Found	. Found	. Found	. Found	. Found	. Found	. Found	. Found	. Found	. Found	. Found	. Found	. Found	. Found
	High	[K].VIGTLKNSLFFSAQPFEITASTNNEGNLK.[V]			0,0259086	0,000840285	3	P04114	Apolipoprotein B-100 OS=Homo sapiens OX=9606 GN=APOB PE=1 SV=2	P04114 [3029-3057]	1	314062625	0								. Found	. Found	. Found	. Found	. Found	. Found	. Found	. Found	. Found	. Found	. Found	. Found	. Found	. Found	. Found	. Found	. Found	. Found	. Found	. Found	. Found	. Found	. Found	. Found	. Found	. Found	. Found	. Found	. Found
	High	[K].VKHLIDSLIDFLNFPR.[F]			7,46413E-05	0	101	P04114	Apolipoprotein B-100 OS=Homo sapiens OX=9606 GN=APOB PE=1 SV=2	P04114 [4186-4201]	1	192707999	0	2.058	0.538536339471523	123.46	75.5	124.5	78.52	89.87	.	.	.	.	.	.	. Found	.	. Found	.	.	.	.	.	.	.	.	.	.	.	.	. Found	.	.	.	.	.	.	.
	High	[K].VLADKFIIPGLK.[L]			0,000972609	0	79	P04114	Apolipoprotein B-100 OS=Homo sapiens OX=9606 GN=APOB PE=1 SV=2	P04114 [3725-3736]	1	131381913	0	1.475	0.722948415201853	116.84	89.6	110.4	87.13	107.82	.	.	.	.	.	.	. Found	. Found	. Found	.	.	.	.	.	.	.	.	.	. Found	. Found	. Found	. Found	.	.	. Found	. Found	. Found	. Found	.
	High	[K].VLVDHFGYTK.[D]			0,00137581	0	92	P04114	Apolipoprotein B-100 OS=Homo sapiens OX=9606 GN=APOB PE=1 SV=2	P04114 [733-742]	0	117862044	0	1.550	0.621412957247958	110.47	82.2	117.8	90.62	97.78	.	.	.	.	.	.	.	.	.	.	.	.	.	.	.	.	.	.	.	.	.	.	.	.	.	.	.	.	.
	High	[K].VLVDHFGYTKDDK.[H]			0,00124809	0	9	P04114	Apolipoprotein B-100 OS=Homo sapiens OX=9606 GN=APOB PE=1 SV=2	P04114 [733-745]	1	153676928	0	2.281	0.445025898082294	42.28	54.5	145.5	36.30	16.55	. Found	. Found	. Found	. Found	. Found	. Found	. Found	. Found	. Found	. Found	.	.	. Found	. Found	. Found	. Found	.	. Found	. Found	. Found	. Found	. Found	. Found	. Found	. Found	. Found	. Found	. Found	. Found
	High	[K].VLVDHFGYTKDDKHEQDMVNGIMLSVEK.[L]			2,50753E-05	0	33	P04114	Apolipoprotein B-100 OS=Homo sapiens OX=9606 GN=APOB PE=1 SV=2	P04114 [733-760]	2	324757621	0	0.897	0.834179884945177	54.86	110.6	89.4	47.89	52.32	.	.	.	.	.	.	.	.	.	.	.	. Found	. Found	. Found	. Found	.	.	. Found	. Found	. Found	. Found	. Found	. Found	. Found	. Found	. Found	. Found	. Found	. Found
	High	[K].VLVDHFGYTKDDKHEQDMVNGIMLSVEK.[L]	1xOxidation [M]		0,000240423	0	24	P04114	Apolipoprotein B-100 OS=Homo sapiens OX=9606 GN=APOB PE=1 SV=2	P04114 [733-760]	2	326357112	0	2.250	0.368061909577143	132.49	29.1	170.9	114.36	91.94	. Found	. Found	. Found	. Found	. Found	.	. Found	. Found	. Found	.	. Found	.	. Found	.	.	. Found	. Found	.	. Found	. Found	. Found	. Found	. Found	. Found	.	. Found	. Found	.	. Found
	High	[K].VLVDHFGYTKDDKHEQDMVNGIMLSVEK.[L]	2xOxidation [M18; M23]		0,000136512	0	17	P04114	Apolipoprotein B-100 OS=Homo sapiens OX=9606 GN=APOB PE=1 SV=2	P04114 [733-760]	2	327956604	0	1.918	0.652761519782301	128.98	53.8	146.2	161.66	55.97	. Found	. Found	. Found	. Found	. Found	. Found	. Found	. Found	. Found	. Found	. Found	. Found	.	.	.	. Found	. Found	. Found	. Found	. Found	. Found	. Found	. Found	. Found	. Found	. Found	. Found	.	.
	High	[K].VNWEEEAASGLLTSLK.[D]			0,000774731	0	23	P04114	Apolipoprotein B-100 OS=Homo sapiens OX=9606 GN=APOB PE=1 SV=2	P04114 [4056-4071]	0	174689086	0	1.812	0.708913404035836	89.77	91.9	108.1	49.45	69.33	. Found	. Found	. Found	. Found	. Found	. Found	. Found	. Found	. Found	. Found	.	.	.	.	.	.	.	.	.	. Found	. Found	. Found	. Found	. Found	. Found	. Found	. Found	. Found	. Found
	High	[K].VNWEEEAASGLLTSLKDNVPK.[A]			5,80134E-07	0	76	P04114	Apolipoprotein B-100 OS=Homo sapiens OX=9606 GN=APOB PE=1 SV=2	P04114 [4056-4076]	1	230017687	0	1.521	0.657006305293807	113.63	91.5	108.5	74.72	97.44	.	.	.	.	.	.	.	.	.	.	.	.	.	.	.	.	.	.	.	.	.	.	.	.	.	.	.	. Found	.
	High	[K].VPLLLSEPINIIDALEMR.[D]	1xOxidation [M17]		0,000336487	0	68	P04114	Apolipoprotein B-100 OS=Homo sapiens OX=9606 GN=APOB PE=1 SV=2	P04114 [2026-2043]	0	205214094	0	2.104	0.656784762382137	126.51	60.9	139.1	168.84	81.84	. Found	. Found	. Found	. Found	. Found	. Found	. Found	. Found	. Found	.	.	.	.	.	.	.	.	.	.	.	.	.	.	.	.	.	.	.	.
	High	[K].VPLLLSEPINIIDALEMR.[D]			0,000299446	0	56	P04114	Apolipoprotein B-100 OS=Homo sapiens OX=9606 GN=APOB PE=1 SV=2	P04114 [2026-2043]	0	203614602	0	1.352	0.964369058686853	139.81	90.7	109.3	76.48	114.72	.	. Found	.	.	.	.	.	.	.	.	.	.	.	.	.	.	.	.	. Found	. Found	. Found	. Found	. Found	. Found	.	. Found	. Found	.	.
	High	[K].VQGVEFSHR.[L]			0,00183343	0	110	P04114	Apolipoprotein B-100 OS=Homo sapiens OX=9606 GN=APOB PE=1 SV=2	P04114 [1859-1867]	0	105853777	0	1.509	0.674713289414514	113.29	78.9	121.1	109.75	96.43	.	.	.	.	.	.	.	. Found	.	.	.	.	.	.	.	.	.	.	.	.	.	.	.	.	.	.	.	.	.
	High	[K].VSALLTPAEQTGTWK.[L]			0,000632563	0	64	P04114	Apolipoprotein B-100 OS=Homo sapiens OX=9606 GN=APOB PE=1 SV=2	P04114 [1968-1982]	0	160185335	0	1.542	0.634182421689206	122.36	90.6	109.4	123.95	94.55	. Found	.	.	. Found	. Found	. Found	.	. Found	. Found	.	.	.	.	.	.	.	.	.	.	.	.	. Found	. Found	.	.	.	.	.	. Found
	High	[K].VSQEGLK.[L]			0,229802	0,00798081	7	P04114	Apolipoprotein B-100 OS=Homo sapiens OX=9606 GN=APOB PE=1 SV=2	P04114 [1731-1737]	0	76041994	0	1.613	0.905717491118899	133.08	98.7	101.3	76.52	125.80	. Found	. Found	. Found	. Found	. Found	. Found	. Found	. Found	. Found	. Found	. Found	. Found	. Found	. Found	. Found	. Found	. Found	. Found	. Found	. Found	. Found	. Found	. Found	. Found	. Found	. Found	. Found	. Found	. Found
	High	[K].WNFYYSPQSSPDK.[K]			0,00142961	0	20	P04114	Apolipoprotein B-100 OS=Homo sapiens OX=9606 GN=APOB PE=1 SV=2	P04114 [4022-4034]	0	161871725	0	1.694	0.759409643503244	86.28	78.8	121.2	36.61	90.73	. Found	.	.	. Found	. Found	. Found	. Found	. Found	. Found	.	.	.	.	.	.	.	.	.	. Found	. Found	. Found	. Found	. Found	. Found	. Found	. Found	. Found	. Found	. Found
	High	[K].WNFYYSPQSSPDKK.[L]			0,000371681	0	37	P04114	Apolipoprotein B-100 OS=Homo sapiens OX=9606 GN=APOB PE=1 SV=2	P04114 [4022-4035]	1	174681221	0	1.504	0.955257224075308	116.21	119.1	80.9	87.53	87.68	.	.	.	.	.	. Found	. Found	. Found	. Found	. Found	.	.	.	.	.	.	.	.	. Found	. Found	. Found	. Found	. Found	. Found	. Found	. Found	. Found	.	. Found
	High	[K].YDKNQDVHSINLPFFETLQEYFER.[N]			2,3434E-06	0	59	P04114	Apolipoprotein B-100 OS=Homo sapiens OX=9606 GN=APOB PE=1 SV=2	P04114 [2060-2083]	1	303244248	0	4.247	0.00430044921336347	128.50	50.4	149.6	111.56	143.87	. Found	. Found	. Found	. Found	. Found	. Found	. Found	. Found	. Found	.	.	.	.	.	.	.	.	.	. Found	. Found	. Found	.	. Found	.	.	.	.	.	.
	High	[K].YDKNQDVHSINLPFFETLQEYFERNR.[Q]			0,0123382	0,000750615	5	P04114	Apolipoprotein B-100 OS=Homo sapiens OX=9606 GN=APOB PE=1 SV=2	P04114 [2060-2085]	2	330258651	0	3.355	0.132916230062062	50.82	52.8	147.2		73.56	. Found	. Found	. Found	. Found	. Found	. Found	. Found	. Found	. Found	. Found	. Found	. Found	. Found	. Found	. Found	. Found	. Found	. Found	. Found	. Found	. Found	. Found	. Found	. Found	. Found	. Found	. Found	. Found	. Found
	High	[K].YENYELTLK.[S]			0,0125344	0,000750615	47	P04114	Apolipoprotein B-100 OS=Homo sapiens OX=9606 GN=APOB PE=1 SV=2	P04114 [1563-1571]	0	117258338	0	1.744	0.681434473372402	107.85	96.4	103.6	148.43	96.04	.	.	.	.	.	.	. Found	. Found	. Found	.	.	.	.	.	.	.	.	.	.	.	.	.	.	.	.	.	.	.	.
	High	[K].YGMVAQVTQTLK.[L]			0,000442738	0	61	P04114	Apolipoprotein B-100 OS=Homo sapiens OX=9606 GN=APOB PE=1 SV=2	P04114 [276-287]	0	133870860	0	1.412	0.80139515195626	106.09	84.8	115.2	75.28	102.43	.	.	.	.	.	.	.	.	.	.	.	.	.	.	.	.	.	.	.	.	.	.	.	.	.	.	.	.	.
	High	[K].YGMVAQVTQTLK.[L]	1xOxidation [M3]		0,000588575	0	60	P04114	Apolipoprotein B-100 OS=Homo sapiens OX=9606 GN=APOB PE=1 SV=2	P04114 [276-287]	0	135470351	0	0.978	0.94786798414016	122.36	111.9	88.1	140.72	70.72	. Found	. Found	. Found	. Found	. Found	. Found	. Found	. Found	. Found	. Found	. Found	.	.	.	.	.	.	.	.	.	.	.	.	.	.	.	.	.	.
	High	[K].YGMVAQVTQTLKLEDTPK.[I]			4,03941E-05	0	26	P04114	Apolipoprotein B-100 OS=Homo sapiens OX=9606 GN=APOB PE=1 SV=2	P04114 [276-293]	1	202205760	0	1.156	0.990662691154869	65.65	85.0	115.0	47.39	48.20	.	.	. Found	. Found	.	.	. Found	. Found	. Found	.	. Found	. Found	.	. Found	.	. Found	.	.	. Found	.	. Found	. Found	. Found	. Found	. Found	.	. Found	. Found	. Found
	High	[K].YHWEHTGLTLR.[E]			0,00215684	0,000313424	155	P04114	Apolipoprotein B-100 OS=Homo sapiens OX=9606 GN=APOB PE=1 SV=2	P04114 [4088-4098]	0	141270696	0	1.155	0.986515106621293	90.71	101.1	98.9	69.88	80.69	.	.	.	.	.	.	. Found	. Found	. Found	.	.	.	.	.	.	.	.	.	.	.	.	.	.	.	.	.	. Found	.	.
	High	[K].YKNFATSNK.[M]			0,0153521	0,000750615	33	P04114	Apolipoprotein B-100 OS=Homo sapiens OX=9606 GN=APOB PE=1 SV=2	P04114 [1578-1586]	1	107254218	0	1.688	0.892229077237911	136.69	77.5	122.5	97.83	108.76	. Found	.	.	.	.	.	. Found	. Found	. Found	. Found	. Found	.	. Found	. Found	.	.	.	.	. Found	.	. Found	.	.	.	. Found	. Found	.	. Found	.
	High	[K].YKNFATSNKMDMTFSK.[Q]	2xOxidation [M10; M12]		0,054763	0,0010353	1	P04114	Apolipoprotein B-100 OS=Homo sapiens OX=9606 GN=APOB PE=1 SV=2	P04114 [1578-1593]	2	194488301	0	0.355	0.0814635333063529	10.32	147.0	53.0	82.30	71.10	. Found	. Found	. Found	. Found	. Found	. Found	. Found	. Found	. Found	. Found	. Found	. Found	.	. Found	. Found	. Found	. Found	. Found	. Found	. Found	. Found	. Found	. Found	. Found	. Found	. Found	. Found	. Found	. Found
	High	[K].YKNFATSNKMDMTFSK.[Q]	1xOxidation [M]		0,00098274	0	30	P04114	Apolipoprotein B-100 OS=Homo sapiens OX=9606 GN=APOB PE=1 SV=2	P04114 [1578-1593]	2	192888810	0	2.072	0.47567584789064	122.31	63.3	136.7	69.24	97.88	. Found	. Found	. Found	.	. Found	.	. Found	. Found	. Found	. Found	. Found	.	.	.	.	. Found	.	.	. Found	. Found	. Found	. Found	. Found	. Found	.	. Found	. Found	. Found	. Found
	High	[K].YLRTEHGSEMLFFGNAIEGK.[S]			0,000543915	0	12	P04114	Apolipoprotein B-100 OS=Homo sapiens OX=9606 GN=APOB PE=1 SV=2	P04114 [2834-2853]	1	229911758	0	11.863	7.93649527936939E-06	26.94	15.5	184.5		35.56	. Found	. Found	. Found	. Found	. Found	. Found	. Found	. Found	. Found	. Found	. Found	. Found	. Found	. Found	. Found	. Found	. Found	. Found	. Found	. Found	. Found	. Found	. Found	. Found	. Found	. Found	. Found	. Found	. Found
	High	[K].YLRTEHGSEMLFFGNAIEGK.[S]	1xOxidation [M10]		0,00037424	0	9	P04114	Apolipoprotein B-100 OS=Homo sapiens OX=9606 GN=APOB PE=1 SV=2	P04114 [2834-2853]	1	231511249	0	0.370	0.117540666709811	13.26	137.3	62.7	86.88	53.70	. Found	. Found	. Found	. Found	. Found	. Found	. Found	. Found	. Found	. Found	. Found	. Found	.	.	.	. Found	. Found	. Found	. Found	. Found	. Found	. Found	. Found	. Found	. Found	. Found	. Found	.	. Found
	High	[K].YRITENDIQIALDDAK.[I]			9,40124E-06	0	21	P04114	Apolipoprotein B-100 OS=Homo sapiens OX=9606 GN=APOB PE=1 SV=2	P04114 [2149-2164]	1	187796033	0	1.368	0.987093671297076	109.01	93.6	106.4	83.97	98.06	. Found	. Found	. Found	. Found	. Found	. Found	. Found	. Found	. Found	. Found	. Found	. Found	.	.	.	. Found	. Found	. Found	. Found	. Found	. Found	. Found	. Found	. Found	. Found	. Found	. Found	. Found	. Found
	High	[K].YRITENDIQIALDDAKINFNEK.[L]			0,169233	0,00633877	2	P04114	Apolipoprotein B-100 OS=Homo sapiens OX=9606 GN=APOB PE=1 SV=2	P04114 [2149-2170]	2	262333622	0	1.198	0.977134742088879	37.45	86.0	114.0	19.42	28.97	. Found	. Found	. Found	. Found	. Found	. Found	. Found	. Found	. Found	. Found	. Found	. Found	. Found	. Found	. Found	. Found	. Found	. Found	. Found	. Found	. Found	. Found	. Found	. Found	. Found	. Found	. Found	. Found	. Found
	High	[K].YSQPEDSLIPFFEITVPESQLTVSQFTLPK.[S]			8,92164E-05	0	45	P04114	Apolipoprotein B-100 OS=Homo sapiens OX=9606 GN=APOB PE=1 SV=2	P04114 [3800-3829]	0	344075118	0	2.521	0.308592404974601	128.19	62.4	137.6	107.68	131.93	. Found	. Found	. Found	.	.	. Found	. Found	.	. Found	.	. Found	.	. Found	.	.	.	.	.	. Found	.	. Found	. Found	. Found	. Found	. Found	. Found	. Found	.	.
	High	[K].YTLNKNSLKIEIPLPFGGK.[S]			0,0181855	0,000840285	10	P04114	Apolipoprotein B-100 OS=Homo sapiens OX=9606 GN=APOB PE=1 SV=2	P04114 [1287-1305]	2	213221140	0	2.159	0.49350165667256	70.15	50.6	149.4	46.90	59.83	. Found	. Found	. Found	. Found	. Found	. Found	. Found	. Found	. Found	. Found	. Found	. Found	. Found	.	.	. Found	. Found	. Found	. Found	. Found	. Found	. Found	. Found	. Found	. Found	. Found	. Found	. Found	. Found
	High	[K].YTYNYEAESSSGVPGTADSR.[S]			2,49039E-05	0	11	P04114	Apolipoprotein B-100 OS=Homo sapiens OX=9606 GN=APOB PE=1 SV=2	P04114 [52-71]	0	215392580	0	2.119	0.498816728665556	49.16	64.1	135.9		45.03	. Found	. Found	. Found	. Found	. Found	. Found	. Found	. Found	. Found	. Found	.	. Found	.	.	. Found	. Found	. Found	. Found	. Found	. Found	. Found	. Found	. Found	. Found	. Found	. Found	. Found	. Found	. Found
	High	[R].AALGKLPQQANDYLNSFNWER.[Q]			4,01544E-06	0	34	P04114	Apolipoprotein B-100 OS=Homo sapiens OX=9606 GN=APOB PE=1 SV=2	P04114 [2113-2133]	1	243521023	0	1.573	0.921646688612003	96.67	90.4	109.6	57.74	75.71	.	.	.	.	.	.	. Found	. Found	. Found	.	.	.	.	.	.	.	.	.	. Found	.	. Found	. Found	. Found	. Found	. Found	. Found	. Found	.	.
	High	[R].AKVHELIER.[Y]			0,00254022	0,000313424	13	P04114	Apolipoprotein B-100 OS=Homo sapiens OX=9606 GN=APOB PE=1 SV=2	P04114 [2339-2347]	1	109463167	0	1.534	0.956084375177942	110.67	90.4	109.6	81.36	97.20	. Found	. Found	. Found	. Found	. Found	.	. Found	. Found	. Found	. Found	. Found	. Found	.	.	.	. Found	. Found	. Found	.	.	.	. Found	. Found	. Found	.	. Found	.	. Found	. Found
	High	[R].AKVHELIERYEVDQQIQVLMDK.[L]	1xOxidation [M20]		0,0354221	0,000840285	3	P04114	Apolipoprotein B-100 OS=Homo sapiens OX=9606 GN=APOB PE=1 SV=2	P04114 [2339-2360]	2	270040253	0	0.010	1.18764845605701E-16		200.0				. Found	. Found	. Found	. Found	. Found	. Found	. Found	. Found	. Found	. Found	. Found	. Found	.	.	.	. Found	. Found	. Found	. Found	. Found	. Found	. Found	. Found	. Found	. Found	. Found	. Found	. Found	. Found
	High	[R].ALVDTLK.[F]			0,0799474	0,0019567	91	P04114	Apolipoprotein B-100 OS=Homo sapiens OX=9606 GN=APOB PE=1 SV=2	P04114 [1028-1034]	0	75946108	0	1.530	0.648401622186599	102.73	89.6	110.4	86.61	93.54	.	.	.	.	.	.	.	.	.	.	.	.	.	.	.	.	.	.	.	.	.	.	.	.	.	.	.	.	.
	High	[R].ANLFNKLVTELR.[G]			0,000146708	0	13	P04114	Apolipoprotein B-100 OS=Homo sapiens OX=9606 GN=APOB PE=1 SV=2	P04114 [345-356]	1	141781617	0	0.779	0.870013900485371	51.49	125.7	74.3	47.06	88.67	.	.	.	.	.	.	. Found	. Found	. Found	. Found	. Found	. Found	. Found	. Found	. Found	. Found	. Found	. Found	. Found	. Found	. Found	. Found	. Found	. Found	. Found	. Found	. Found	. Found	. Found
	High	[R].ATLYALSHAVNNYHK.[T]			2,32527E-05	0	156	P04114	Apolipoprotein B-100 OS=Homo sapiens OX=9606 GN=APOB PE=1 SV=2	P04114 [440-454]	0	170187073	0	1.795	0.319354512156497	108.23	76.8	123.2	85.70	96.38	.	.	.	.	.	.	.	.	.	.	.	.	.	.	.	.	.	.	.	.	.	.	.	.	.	.	.	.	.
	High	[R].DAVEKPQEFTIVAFVK.[Y]			1,80399E-05	0	79	P04114	Apolipoprotein B-100 OS=Homo sapiens OX=9606 GN=APOB PE=1 SV=2	P04114 [2044-2059]	0	182097928	0	1.730	0.391578519583474	100.06	76.7	123.3	94.47	87.61	.	.	.	.	.	.	.	.	.	.	.	.	.	.	.	.	.	.	.	.	.	.	.	.	.	.	.	.	.
	High	[R].DFSAEYEEDGKYEGLQEWEGK.[A]			4,37498E-06	0	76	P04114	Apolipoprotein B-100 OS=Homo sapiens OX=9606 GN=APOB PE=1 SV=2	P04114 [3953-3973]	1	250906777	0	1.566	0.853818343049744	121.53	68.9	131.1	95.32	98.71	.	.	.	.	.	.	. Found	. Found	. Found	.	.	.	.	.	.	.	.	.	.	.	.	. Found	. Found	.	.	.	.	.	.
	High	[R].DLKMLETVR.[T]	1xOxidation [M4]		0,038104	0,000840285	23	P04114	Apolipoprotein B-100 OS=Homo sapiens OX=9606 GN=APOB PE=1 SV=2	P04114 [1309-1317]	1	112060307	0	1.185	0.994806865988899	121.56	69.0	131.0	103.13	81.05	. Found	. Found	. Found	. Found	. Found	. Found	. Found	. Found	. Found	. Found	. Found	. Found	.	.	. Found	. Found	.	. Found	. Found	. Found	.	. Found	. Found	. Found	.	.	.	.	.
	High	[R].DLKVEDIPLAR.[I]			0,00839768	0,000750615	170	P04114	Apolipoprotein B-100 OS=Homo sapiens OX=9606 GN=APOB PE=1 SV=2	P04114 [2695-2705]	1	126872088	0	1.483	0.708913404035836	105.65	88.8	111.2	80.99	93.69	.	.	.	.	.	.	.	.	.	.	.	.	.	.	.	.	.	.	.	.	.	.	.	.	.	.	.	.	.
	High	[R].DRMYQMDIQQELQR.[Y]	2xOxidation [M3; M6]		0,00197431	0,000313424	25	P04114	Apolipoprotein B-100 OS=Homo sapiens OX=9606 GN=APOB PE=1 SV=2	P04114 [2521-2534]	1	188585311	0	0.447	0.0677311640921388	19.57	135.4	64.6	93.44	66.65	. Found	. Found	. Found	. Found	. Found	. Found	. Found	. Found	. Found	. Found	. Found	. Found	.	.	.	. Found	. Found	. Found	.	.	.	.	.	.	.	.	.	.	.
	High	[R].EELCTMFIR.[E]	1xCarbamidomethyl [C4]		0,0165035	0,000750615	30	P04114	Apolipoprotein B-100 OS=Homo sapiens OX=9606 GN=APOB PE=1 SV=2	P04114 [4214-4222]	0	119855949	0	4.038	0.011766654079824	117.06	30.6	169.4	93.96	74.01	.	.	.	. Found	.	.	. Found	. Found	. Found	. Found	. Found	.	. Found	. Found	. Found	.	.	.	. Found	. Found	. Found	. Found	. Found	. Found	. Found	. Found	. Found	. Found	. Found
	High	[R].EELCTMFIR.[E]	1xCarbamidomethyl [C4]; 1xOxidation [M6]		0,0651856	0,00141145	38	P04114	Apolipoprotein B-100 OS=Homo sapiens OX=9606 GN=APOB PE=1 SV=2	P04114 [4214-4222]	0	121455441	0	2.105	0.493049466220765	132.02	71.4	128.6	150.03	114.71	. Found	. Found	. Found	. Found	. Found	.	. Found	. Found	. Found	.	.	.	.	.	.	.	.	.	.	.	.	.	.	.	. Found	.	.	.	.
	High	[R].EFQVPTFTIPK.[L]			0,00928107	0,000750615	57	P04114	Apolipoprotein B-100 OS=Homo sapiens OX=9606 GN=APOB PE=1 SV=2	P04114 [1334-1344]	0	130670416	0	1.376	0.841871347442062	104.66	85.9	114.1	85.51	78.73	.	.	.	.	.	.	.	.	.	. Found	.	. Found	.	.	.	.	.	.	.	.	.	.	. Found	.	.	.	. Found	.	.
	High	[R].EIFNMAR.[D]			0,219825	0,00768987	46	P04114	Apolipoprotein B-100 OS=Homo sapiens OX=9606 GN=APOB PE=1 SV=2	P04114 [428-434]	0	88043455	0	1.363	0.917694217781163	119.22	96.7	103.3	91.99	112.04	.	. Found	. Found	.	. Found	.	.	.	. Found	.	.	.	.	.	.	.	.	.	.	.	.	.	. Found	.	.	.	.	.	.
	High	[R].ELLKDLSK.[E]			0,0892437	0,00268565	15	P04114	Apolipoprotein B-100 OS=Homo sapiens OX=9606 GN=APOB PE=1 SV=2	P04114 [4271-4278]	1	94556152	0	1.186	0.999209963067217	124.12	94.9	105.1	135.04	99.49	. Found	. Found	. Found	. Found	. Found	. Found	. Found	. Found	. Found	. Found	. Found	. Found	.	.	.	.	.	. Found	. Found	. Found	.	. Found	. Found	. Found	. Found	. Found	. Found	. Found	. Found
	High	[R].ELLKDLSKEAQEVFK.[A]			0,00283834	0,000313424	5	P04114	Apolipoprotein B-100 OS=Homo sapiens OX=9606 GN=APOB PE=1 SV=2	P04114 [4271-4285]	2	177697419	0	2.338	0.42547459228853	104.09	46.5	153.5	120.75	29.76	. Found	. Found	. Found	. Found	. Found	. Found	. Found	. Found	. Found	. Found	. Found	. Found	.	.	. Found	. Found	. Found	. Found	. Found	. Found	. Found	. Found	. Found	. Found	. Found	. Found	. Found	. Found	. Found
	High	[R].ESDEETQIK.[V]			0,0124359	0,000750615	37	P04114	Apolipoprotein B-100 OS=Homo sapiens OX=9606 GN=APOB PE=1 SV=2	P04114 [4047-4055]	0	107848987	0	1.389	0.98039981659082	122.47	99.9	100.1	44.30	97.72	.	.	.	. Found	. Found	. Found	. Found	. Found	. Found	. Found	.	.	. Found	. Found	.	.	.	.	. Found	.	.	.	.	.	.	. Found	. Found	.	. Found
	High	[R].ESDEETQIKVNWEEEAASGLLTSLK.[D]			5,10522E-06	0	18	P04114	Apolipoprotein B-100 OS=Homo sapiens OX=9606 GN=APOB PE=1 SV=2	P04114 [4047-4071]	1	280636289	0	2.378	0.283205866413118	115.79	68.2	131.8	87.49	98.11	. Found	. Found	.	. Found	. Found	.	. Found	. Found	. Found	. Found	.	.	.	.	.	.	.	.	.	. Found	.	. Found	. Found	. Found	. Found	. Found	. Found	. Found	. Found
	High	[R].ESDEETQIKVNWEEEAASGLLTSLKDNVPK.[A]			1,9356E-07	0	49	P04114	Apolipoprotein B-100 OS=Homo sapiens OX=9606 GN=APOB PE=1 SV=2	P04114 [4047-4076]	2	335964890	0	1.771	0.769506851950801	108.32	74.4	125.6	82.02	88.03	. Found	.	.	.	.	.	.	.	. Found	.	.	.	.	.	.	.	.	. Found	.	. Found	. Found	.	.	.	. Found	.	.	.	.
	High	[R].ETLEDTR.[D]			0,18702	0,00643402	10	P04114	Apolipoprotein B-100 OS=Homo sapiens OX=9606 GN=APOB PE=1 SV=2	P04114 [2514-2520]	0	86341050	0	1.194	0.995454073409617	119.59	100.0	100.0	115.90	79.99	. Found	. Found	. Found	. Found	. Found	. Found	. Found	. Found	. Found	. Found	. Found	. Found	. Found	. Found	.	. Found	. Found	. Found	. Found	.	. Found	.	. Found	. Found	. Found	. Found	. Found	. Found	. Found
	High	[R].ETLEDTRDR.[M]			0,224765	0,00782232	11	P04114	Apolipoprotein B-100 OS=Homo sapiens OX=9606 GN=APOB PE=1 SV=2	P04114 [2514-2522]	1	113453856	0	0.928	0.915538850722107	112.91	111.1	88.9	83.80	145.79	. Found	. Found	. Found	. Found	. Found	. Found	. Found	. Found	. Found	. Found	. Found	.	. Found	.	. Found	.	. Found	.	. Found	. Found	. Found	.	. Found	. Found	. Found	. Found	. Found	. Found	. Found
	High	[R].EVGTVLSQVYSK.[V]			0,00377686	0,000313424	42	P04114	Apolipoprotein B-100 OS=Homo sapiens OX=9606 GN=APOB PE=1 SV=2	P04114 [4223-4234]	0	130969981	0	1.733	0.492629189700705	126.38	67.6	132.4	152.01	121.96	. Found	.	. Found	. Found	.	. Found	.	.	.	. Found	.	.	.	.	.	.	.	.	.	.	.	.	.	. Found	. Found	.	. Found	. Found	.
	High	[R].EYSGTIASEANTYLNSK.[S]			0,000119418	0	23	P04114	Apolipoprotein B-100 OS=Homo sapiens OX=9606 GN=APOB PE=1 SV=2	P04114 [3508-3524]	0	184786576	0	1.252	0.977134742088879	69.56	89.5	110.5	102.07	83.93	. Found	. Found	. Found	. Found	. Found	.	. Found	. Found	. Found	. Found	. Found	. Found	.	.	.	. Found	. Found	.	. Found	. Found	. Found	.	.	. Found	.	.	.	.	. Found
	High	[R].FFGEGTK.[K]			0,22377	0,00782232	49	P04114	Apolipoprotein B-100 OS=Homo sapiens OX=9606 GN=APOB PE=1 SV=2	P04114 [298-304]	0	78538283	0	1.336	0.88006307267883	106.13	102.3	97.7	70.12	98.27	.	.	.	.	.	.	.	.	.	.	.	.	. Found	.	.	.	.	.	.	.	.	.	.	.	.	.	.	.	.
	High	[R].FFGEGTKK.[M]			0,183663	0,00643402	34	P04114	Apolipoprotein B-100 OS=Homo sapiens OX=9606 GN=APOB PE=1 SV=2	P04114 [298-305]	1	91347779	0	1.043	0.996643278124297	103.31	98.6	101.4	67.86	84.40	. Found	. Found	.	.	. Found	. Found	. Found	. Found	. Found	.	.	.	.	.	.	. Found	.	.	.	.	.	. Found	. Found	. Found	. Found	.	. Found	. Found	. Found
	High	[R].FFSLLSGSLNSHGLELNADILGTDK.[I]			3,73976E-07	0	16	P04114	Apolipoprotein B-100 OS=Homo sapiens OX=9606 GN=APOB PE=1 SV=2	P04114 [1611-1635]	0	264835662	0	1.264	0.983306306909598	111.45	106.7	93.3	61.47	115.04	. Found	. Found	. Found	. Found	. Found	. Found	. Found	. Found	. Found	.	.	. Found	.	.	.	.	.	.	. Found	.	. Found	. Found	. Found	. Found	. Found	. Found	. Found	. Found	. Found
	High	[R].FFSLLSGSLNSHGLELNADILGTDKINSGAHK.[A]			3,93364E-06	0	52	P04114	Apolipoprotein B-100 OS=Homo sapiens OX=9606 GN=APOB PE=1 SV=2	P04114 [1611-1642]	1	335572809	0	1.353	0.990662691154869	123.93	90.8	109.2	102.69	136.76	. Found	.	.	.	.	. Found	. Found	. Found	. Found	. Found	.	.	.	.	.	.	.	.	. Found	. Found	.	. Found	.	.	.	.	. Found	.	.
	High	[R].FQFPGKPGIYTR.[E]			0,00260454	0,000313424	35	P04114	Apolipoprotein B-100 OS=Homo sapiens OX=9606 GN=APOB PE=1 SV=2	P04114 [4202-4213]	0	141075285	0	1.492	0.830845003270937	112.97	93.1	106.9	137.17	107.84	. Found	.	. Found	.	. Found	. Found	. Found	. Found	. Found	.	. Found	.	.	.	.	.	.	.	.	.	. Found	. Found	. Found	. Found	.	.	.	.	. Found
	High	[R].FQFPGKPGIYTREELCTMFIR.[E]	1xCarbamidomethyl [C16]		0,000933141	0	16	P04114	Apolipoprotein B-100 OS=Homo sapiens OX=9606 GN=APOB PE=1 SV=2	P04114 [4202-4222]	1	259029450	0	1.618	0.928294931537033	109.18	78.7	121.3	104.80	80.34	. Found	.	.	.	.	. Found	. Found	. Found	. Found	. Found	. Found	. Found	. Found	. Found	. Found	. Found	. Found	. Found	. Found	. Found	. Found	. Found	. Found	. Found	. Found	. Found	. Found	. Found	. Found
	High	[R].FQFPGKPGIYTREELCTMFIR.[E]	1xCarbamidomethyl [C16]; 1xOxidation [M18]		0,0342314	0,000840285	7	P04114	Apolipoprotein B-100 OS=Homo sapiens OX=9606 GN=APOB PE=1 SV=2	P04114 [4202-4222]	1	260628941	0	1.484	0.933122110873311	96.52	84.0	116.0	84.49	64.81	. Found	. Found	. Found	. Found	. Found	. Found	. Found	. Found	. Found	. Found	. Found	. Found	.	.	.	. Found	. Found	. Found	. Found	. Found	. Found	. Found	. Found	. Found	. Found	. Found	. Found	. Found	. Found
	High	[R].FSDEGTHESQISFTIEGPLTSFGLSNK.[I]			4,7831E-06	0	34	P04114	Apolipoprotein B-100 OS=Homo sapiens OX=9606 GN=APOB PE=1 SV=2	P04114 [2936-2962]	0	292838977	0	1.565	0.901538539987826	111.00	73.9	126.1	65.48	87.35	. Found	. Found	. Found	. Found	.	. Found	. Found	.	.	.	. Found	.	.	.	.	.	.	.	.	.	.	. Found	. Found	. Found	.	.	. Found	. Found	. Found
	High	[R].GIISALLVPPETEEAK.[Q]			0,000246265	0	81	P04114	Apolipoprotein B-100 OS=Homo sapiens OX=9606 GN=APOB PE=1 SV=2	P04114 [159-174]	0	166692618	0	1.605	0.542572773303906	106.71	89.8	110.2	69.59	95.51	.	.	.	.	. Found	.	.	. Found	. Found	.	.	.	.	.	.	.	.	.	.	.	.	.	.	.	. Found	. Found	. Found	.	.
	High	[R].GLSDEAVTSLLPQLIEVSSPITLQALVQCGQPQCSTHILQWLK.[R]	2xCarbamidomethyl [C29; C34]; 1xHNE [K/H]	P04114 1xHNE [K/H]	0,115539	0,00369184	2	P04114	Apolipoprotein B-100 OS=Homo sapiens OX=9606 GN=APOB PE=1 SV=2	P04114 [357-399]	0	491459952	0								. Found	. Found	. Found	. Found	. Found	. Found	. Found	. Found	. Found	. Found	. Found	. Found	. Found	. Found	. Found	. Found	. Found	. Found	. Found	. Found	. Found	. Found	. Found	. Found	. Found	. Found	. Found	. Found	. Found
	High	[R].GLSDEAVTSLLPQLIEVSSPITLQALVQCGQPQCSTHILQWLK.[R]	2xCarbamidomethyl [C29; C34]		1,10081E-05	0	4	P04114	Apolipoprotein B-100 OS=Homo sapiens OX=9606 GN=APOB PE=1 SV=2	P04114 [357-399]	0	475848449	0	5.885	0.00552058556909052	125.91	67.6	132.4	94.25	138.66	. Found	. Found	. Found	. Found	. Found	. Found	. Found	. Found	. Found	. Found	. Found	. Found	. Found	. Found	. Found	. Found	.	. Found	. Found	. Found	. Found	. Found	. Found	. Found	. Found	. Found	. Found	. Found	.
	High	[R].GLSDEAVTSLLPQLIEVSSPITLQALVQCGQPQCSTHILQWLKR.[V]	2xCarbamidomethyl [C29; C34]		1,6489E-08	0	13	P04114	Apolipoprotein B-100 OS=Homo sapiens OX=9606 GN=APOB PE=1 SV=2	P04114 [357-400]	1	491458560	1	2.072	0.636360643874132	99.87	71.2	128.8	55.22	137.73	. Found	. Found	. Found	. Found	. Found	. Found	. Found	. Found	. Found	. Found	. Found	. Found	. Found	. Found	. Found	. Found	.	.	. Found	. Found	. Found	. Found	. Found	. Found	. Found	. Found	. Found	.	.
	High	[R].HIQNIDIQHLAGK.[L]			1,5041E-05	0	83	P04114	Apolipoprotein B-100 OS=Homo sapiens OX=9606 GN=APOB PE=1 SV=2	P04114 [2272-2284]	0	148681249	0	1.745	0.374085831915415	119.36	82.1	117.9	104.64	85.15	.	.	.	.	.	.	.	.	.	. Found	. Found	.	.	.	.	.	.	.	.	.	.	.	. Found	. Found	.	.	.	. Found	.
	High	[R].HKFLDSNIK.[F]			0,0027779	0,000313424	81	P04114	Apolipoprotein B-100 OS=Homo sapiens OX=9606 GN=APOB PE=1 SV=2	P04114 [1428-1436]	1	110160512	0	0.921	0.850015481309473	70.76	90.0	110.0	64.41	68.34	.	.	.	.	.	.	.	.	.	.	.	.	.	.	.	.	.	.	.	. Found	.	. Found	. Found	. Found	.	.	.	.	.
	High	[R].HSITNPLAVLCEFISQSIK.[S]	1xCarbamidomethyl [C11]		9,91562E-08	0	131	P04114	Apolipoprotein B-100 OS=Homo sapiens OX=9606 GN=APOB PE=1 SV=2	P04114 [3184-3202]	0	215713725	0	2.165	0.08543619069556	108.34	70.8	129.2	61.48	76.23	.	.	.	.	.	.	.	.	.	.	.	.	.	.	.	.	.	.	.	.	.	.	.	.	.	.	.	.	.
	High	[R].HVGSKLIVAMSSWLQK.[A]			9,45737E-05	0	16	P04114	Apolipoprotein B-100 OS=Homo sapiens OX=9606 GN=APOB PE=1 SV=2	P04114 [1225-1240]	1	178398874	0	3.926	0.0753128463961688	47.41	36.4	163.6	21.41	29.59	. Found	. Found	.	. Found	. Found	.	. Found	. Found	. Found	. Found	.	. Found	.	. Found	. Found	.	.	. Found	. Found	. Found	. Found	. Found	. Found	. Found	. Found	. Found	. Found	. Found	. Found
	High	[R].IGQDGISTSATTNLK.[C]			5,83068E-05	0	82	P04114	Apolipoprotein B-100 OS=Homo sapiens OX=9606 GN=APOB PE=1 SV=2	P04114 [1647-1661]	0	150578058	0	1.557	0.612080399372141	118.13	78.3	121.7	109.50	103.71	.	.	.	.	.	.	.	.	.	.	.	.	.	.	.	.	.	.	.	.	.	.	. Found	.	.	.	.	.	.
	High	[R].IHSGSFQSQVELSNDQEK.[A]			6,45223E-07	0	15	P04114	Apolipoprotein B-100 OS=Homo sapiens OX=9606 GN=APOB PE=1 SV=2	P04114 [3639-3656]	0	203295704	0	1.739	0.778766129214424	124.00	74.0	126.0	93.08	91.31	. Found	. Found	. Found	. Found	. Found	. Found	. Found	. Found	. Found	. Found	. Found	. Found	. Found	.	. Found	.	. Found	.	. Found	. Found	. Found	. Found	. Found	. Found	. Found	. Found	. Found	. Found	. Found
	High	[R].IHSGSFQSQVELSNDQEKAHLDIAGSLEGHLR.[F]			3,32807E-07	0	57	P04114	Apolipoprotein B-100 OS=Homo sapiens OX=9606 GN=APOB PE=1 SV=2	P04114 [3639-3670]	1	350273095	0	0.741	0.568169185776893	71.73	115.7	84.3	107.34	132.20	. Found	. Found	.	. Found	. Found	. Found	. Found	. Found	. Found	. Found	.	.	.	.	. Found	.	.	.	. Found	. Found	. Found	. Found	. Found	. Found	. Found	. Found	. Found	.	.
	High	[R].ILGEELGFASLHDLQLLGK.[L]			6,04512E-07	0	169	P04114	Apolipoprotein B-100 OS=Homo sapiens OX=9606 GN=APOB PE=1 SV=2	P04114 [779-797]	0	205313282	0	1.498	0.686714890392384	105.14	89.7	110.3	72.08	86.16	.	.	.	.	.	.	.	.	.	.	.	.	.	.	.	.	.	.	.	.	.	.	.	.	.	.	.	.	.
	High	[R].ILGEELGFASLHDLQLLGKLLLMGAR.[T]			0,0552512	0,00122162	1	P04114	Apolipoprotein B-100 OS=Homo sapiens OX=9606 GN=APOB PE=1 SV=2	P04114 [779-804]	1	280758518	0	100.000	1.18764845605701E-16			200.0		91.41	. Found	. Found	. Found	. Found	. Found	. Found	. Found	. Found	. Found	. Found	. Found	. Found	. Found	. Found	. Found	. Found	. Found	. Found	. Found	. Found	. Found	. Found	. Found	. Found	. Found	. Found	. Found	. Found	. Found
	High	[R].INCKVELEVPQLCSFILK.[T]	2xCarbamidomethyl [C3; C13]		6,24473E-05	0	82	P04114	Apolipoprotein B-100 OS=Homo sapiens OX=9606 GN=APOB PE=1 SV=2	P04114 [76-93]	1	219016611	0	2.026	0.337032577009073	112.91	59.2	140.8	64.10	79.09	.	.	.	.	.	.	.	.	.	.	.	.	.	.	.	.	.	.	.	.	.	.	. Found	.	.	.	.	.	.
	High	[R].IPSVQINFK.[D]			0,0122897	0,000750615	42	P04114	Apolipoprotein B-100 OS=Homo sapiens OX=9606 GN=APOB PE=1 SV=2	P04114 [2626-2634]	0	104560406	0	1.717	0.407021217801937	97.41	77.1	122.9	125.12	70.85	.	.	.	.	.	.	. Found	. Found	. Found	. Found	. Found	.	.	.	.	.	.	. Found	.	.	.	. Found	. Found	. Found	. Found	. Found	. Found	.	.
	High	[R].IPSVQINFKDLK.[N]			0,00114833	0	21	P04114	Apolipoprotein B-100 OS=Homo sapiens OX=9606 GN=APOB PE=1 SV=2	P04114 [2626-2637]	1	140181003	0	0.928	0.949211453145072	26.93	103.4	96.6	26.08	17.09	. Found	. Found	. Found	. Found	. Found	. Found	. Found	. Found	. Found	. Found	. Found	. Found	. Found	. Found	. Found	.	.	.	. Found	. Found	. Found	. Found	. Found	. Found	. Found	. Found	. Found	. Found	. Found
	High	[R].ITENDIQIALDDAK.[I]			9,82103E-05	0	111	P04114	Apolipoprotein B-100 OS=Homo sapiens OX=9606 GN=APOB PE=1 SV=2	P04114 [2151-2164]	0	155879589	0	1.464	0.738721572742275	109.94	90.9	109.1	113.27	93.80	.	.	.	.	.	.	.	.	.	.	.	.	.	.	.	.	.	.	.	.	.	. Found	.	.	.	.	.	.	.
	High	[R].ITENDIQIALDDAKINFNEK.[L]			5,48654E-06	0	17	P04114	Apolipoprotein B-100 OS=Homo sapiens OX=9606 GN=APOB PE=1 SV=2	P04114 [2151-2170]	1	230417178	0	1.216	0.998019339144021	103.29	98.4	101.6	43.57	71.68	. Found	. Found	. Found	. Found	. Found	. Found	. Found	. Found	. Found	. Found	.	. Found	. Found	.	. Found	. Found	. Found	. Found	.	. Found	. Found	. Found	. Found	.	. Found	. Found	. Found	.	.
	High	[R].ITLPDFR.[L]			0,0582806	0,00122162	90	P04114	Apolipoprotein B-100 OS=Homo sapiens OX=9606 GN=APOB PE=1 SV=2	P04114 [2706-2712]	0	86148288	0	1.428	0.782468389526458	111.95	84.5	115.5	101.15	104.32	.	.	.	.	.	. Found	.	.	.	. Found	.	.	.	.	.	.	.	.	.	.	.	.	.	. Found	.	.	.	.	.
	High	[R].IYSLWEHSTK.[N]			0,00266103	0,000313424	94	P04114	Apolipoprotein B-100 OS=Homo sapiens OX=9606 GN=APOB PE=1 SV=2	P04114 [3559-3568]	0	126363681	0	2.236	0.0662126040793313	120.00	79.2	120.8	128.84	100.32	.	.	.	.	.	.	.	.	.	.	. Found	.	.	.	.	.	.	.	.	.	.	.	.	.	.	.	.	.	.
	High	[R].KGNVATEISTER.[D]			0,000113819	0	107	P04114	Apolipoprotein B-100 OS=Homo sapiens OX=9606 GN=APOB PE=1 SV=2	P04114 [196-207]	1	130468047	0	1.087	0.999209963067217	94.28	102.8	97.2	67.45	88.42	.	.	.	.	.	.	.	.	.	.	.	.	.	.	.	.	.	.	.	.	.	.	.	.	.	.	.	.	.
	High	[R].KGNVATEISTERDLGQCDR.[F]	1xCarbamidomethyl [C17]		5,87081E-05	0	68	P04114	Apolipoprotein B-100 OS=Homo sapiens OX=9606 GN=APOB PE=1 SV=2	P04114 [196-214]	2	214903022	0	1.238	0.999850434146449	94.46	105.8	94.2	52.91	86.52	.	.	.	.	.	.	. Found	.	. Found	.	.	.	.	.	.	.	.	.	.	.	.	.	.	.	.	.	.	.	.
	High	[R].KSISAALEHK.[V]			0,000801854	0	68	P04114	Apolipoprotein B-100 OS=Homo sapiens OX=9606 GN=APOB PE=1 SV=2	P04114 [1958-1967]	1	108361568	0	1.726	0.395565980890939	118.40	84.0	116.0	84.52	132.87	.	.	.	.	.	.	.	.	.	. Found	.	.	.	.	.	.	.	.	.	.	.	.	.	.	.	.	.	.	.
	High	[R].KSISAALEHKVSALLTPAEQTGTWK.[L]			0,0864205	0,00250817	6	P04114	Apolipoprotein B-100 OS=Homo sapiens OX=9606 GN=APOB PE=1 SV=2	P04114 [1958-1982]	2	266645119	0	100.000	1.18764845605701E-16			200.0		22.44	. Found	. Found	. Found	. Found	. Found	. Found	. Found	. Found	. Found	. Found	. Found	. Found	. Found	. Found	. Found	. Found	. Found	. Found	. Found	. Found	. Found	. Found	. Found	. Found	. Found	. Found	. Found	. Found	. Found
	High	[R].KYTYNYEAESSSGVPGTADSR.[S]			9,16339E-08	0	102	P04114	Apolipoprotein B-100 OS=Homo sapiens OX=9606 GN=APOB PE=1 SV=2	P04114 [51-71]	1	228202076	0	1.570	0.591794541939872	119.25	84.9	115.1	84.35	85.81	. Found	.	.	.	.	.	. Found	. Found	.	.	.	.	.	.	.	.	.	.	.	.	.	.	.	.	.	.	.	.	.
	High	[R].LAAYLMLMR.[S]			0,00704751	0,000591694	15	P04114	Apolipoprotein B-100 OS=Homo sapiens OX=9606 GN=APOB PE=1 SV=2	P04114 [559-567]	0	108158967	0	1.172	0.979031584670884	72.30	96.0	104.0	38.71	77.97	. Found	. Found	. Found	. Found	. Found	. Found	. Found	. Found	. Found	. Found	. Found	.	. Found	. Found	. Found	.	. Found	.	.	.	.	. Found	. Found	. Found	. Found	. Found	. Found	. Found	. Found
	High	[R].LAAYLMLMR.[S]	1xOxidation [M]		0,00817553	0,000750615	242	P04114	Apolipoprotein B-100 OS=Homo sapiens OX=9606 GN=APOB PE=1 SV=2	P04114 [559-567]	0	109758458	0	1.361	0.898700634424699	118.92	82.2	117.8	106.57	85.71	.	.	.	.	.	.	. Found	. Found	. Found	.	.	.	.	.	.	.	.	.	.	.	.	.	.	.	.	.	.	.	.
	High	[R].LAAYLMLMR.[S]	2xOxidation [M6; M8]		0,0129369	0,000750615	7	P04114	Apolipoprotein B-100 OS=Homo sapiens OX=9606 GN=APOB PE=1 SV=2	P04114 [559-567]	0	111357950	0	0.925	0.845236139086792	111.54	69.6	130.4	102.89	103.56	. Found	. Found	. Found	. Found	. Found	. Found	. Found	. Found	. Found	. Found	. Found	. Found	. Found	. Found	. Found	. Found	. Found	. Found	. Found	. Found	. Found	.	.	.	.	. Found	. Found	.	.
	High	[R].LELELRPTGEIEQYSVSATYELQR.[E]			4,26043E-07	0	104	P04114	Apolipoprotein B-100 OS=Homo sapiens OX=9606 GN=APOB PE=1 SV=2	P04114 [1001-1024]	0	282443633	0	1.821	0.293698389508526	114.16	81.5	118.5	78.68	91.26	.	.	.	. Found	. Found	.	. Found	. Found	.	.	.	.	.	.	.	.	.	.	.	.	.	.	.	.	.	.	. Found	.	. Found
	High	[R].LELELRPTGEIEQYSVSATYELQREDR.[A]			2,65141E-06	0	57	P04114	Apolipoprotein B-100 OS=Homo sapiens OX=9606 GN=APOB PE=1 SV=2	P04114 [1001-1027]	1	322460698	0	1.312	0.908998015641201	122.27	77.7	122.3	83.42	88.34	.	.	.	.	. Found	.	.	.	.	.	. Found	. Found	.	.	.	.	.	.	. Found	.	.	. Found	.	.	.	.	.	.	.
	High	[R].LEPLKLHVAGNLK.[G]			0,00772037	0,000750615	23	P04114	Apolipoprotein B-100 OS=Homo sapiens OX=9606 GN=APOB PE=1 SV=2	P04114 [1816-1828]	1	143186821	0	1.544	0.951212766667207	109.59	83.3	116.7	98.22	90.78	.	.	.	.	.	. Found	. Found	. Found	. Found	. Found	. Found	. Found	.	.	.	. Found	. Found	.	.	. Found	. Found	. Found	. Found	. Found	.	. Found	.	. Found	. Found
	High	[R].LIDLSIQNYHTFLIYITELLKK.[L]			0,00101729	0	1	P04114	Apolipoprotein B-100 OS=Homo sapiens OX=9606 GN=APOB PE=1 SV=2	P04114 [4520-4541]	1	267851675	0	1.853	0.681251355525834	101.31	64.1	135.9	43.55	150.69	. Found	. Found	. Found	. Found	. Found	. Found	. Found	. Found	. Found	. Found	. Found	. Found	. Found	. Found	. Found	. Found	. Found	. Found	. Found	. Found	. Found	. Found	. Found	. Found	. Found	. Found	. Found	. Found	. Found
	High	[R].LLDHRVPQTDMTFR.[H]			0,000617544	0	15	P04114	Apolipoprotein B-100 OS=Homo sapiens OX=9606 GN=APOB PE=1 SV=2	P04114 [1211-1224]	1	172888500	0	1.295	0.987093671297076	57.24	86.9	113.1	42.98	31.36	. Found	. Found	.	.	.	. Found	. Found	. Found	. Found	. Found	. Found	. Found	. Found	. Found	. Found	. Found	. Found	. Found	. Found	. Found	. Found	. Found	. Found	. Found	. Found	. Found	. Found	. Found	. Found
	High	[R].LLDHRVPQTDMTFR.[H]	1xOxidation [M11]		0,000326258	0	28	P04114	Apolipoprotein B-100 OS=Homo sapiens OX=9606 GN=APOB PE=1 SV=2	P04114 [1211-1224]	1	174487991	0	1.157	0.987093671297076	96.33	86.0	114.0	85.40	50.68	. Found	. Found	. Found	. Found	. Found	. Found	. Found	. Found	. Found	.	. Found	. Found	.	.	.	. Found	.	.	.	.	.	. Found	. Found	.	. Found	.	. Found	.	.
	High	[R].LNGEIQALELPQK.[A]			0,000889151	0	17	P04114	Apolipoprotein B-100 OS=Homo sapiens OX=9606 GN=APOB PE=1 SV=2	P04114 [2450-2462]	0	145280567	0	2.849	0.319340913303775	120.96	64.3	135.7	127.89	110.51	. Found	. Found	. Found	. Found	. Found	. Found	. Found	. Found	. Found	. Found	. Found	. Found	.	.	.	. Found	. Found	. Found	. Found	.	. Found	. Found	. Found	. Found	. Found	. Found	. Found	. Found	. Found
	High	[R].LNGEIQALELPQKAEALK.[L]			2,06929E-05	0	55	P04114	Apolipoprotein B-100 OS=Homo sapiens OX=9606 GN=APOB PE=1 SV=2	P04114 [2450-2467]	1	196510152	0	1.493	0.956649477206072	112.63	84.3	115.7	120.90	125.20	.	.	.	.	. Found	.	. Found	. Found	. Found	.	.	.	.	.	.	.	.	.	.	.	.	. Found	. Found	.	.	.	.	. Found	. Found
	High	[R].LNTDIAGLASAIDMSTNYNSDSLHFSNVFR.[S]			5,98867E-08	0	15	P04114	Apolipoprotein B-100 OS=Homo sapiens OX=9606 GN=APOB PE=1 SV=2	P04114 [1868-1897]	0	327354808	0	3.234	0.0433268794705146	86.85	38.0	162.0	74.99	52.29	. Found	. Found	. Found	. Found	. Found	. Found	. Found	. Found	. Found	. Found	. Found	. Found	. Found	. Found	. Found	. Found	.	. Found	. Found	. Found	. Found	. Found	. Found	. Found	. Found	. Found	. Found	. Found	. Found
	High	[R].LNTDIAGLASAIDMSTNYNSDSLHFSNVFR.[S]	1xOxidation [M14]		1,21816E-07	0	62	P04114	Apolipoprotein B-100 OS=Homo sapiens OX=9606 GN=APOB PE=1 SV=2	P04114 [1868-1897]	0	328954300	0	1.864	0.681251355525834	137.52	61.9	138.1	160.96	104.68	.	. Found	.	.	.	.	.	. Found	.	.	.	. Found	.	.	.	.	.	. Found	.	.	.	. Found	. Found	. Found	.	.	.	.	.
	High	[R].LPYTIITTPPLK.[D]			0,00147524	0	30	P04114	Apolipoprotein B-100 OS=Homo sapiens OX=9606 GN=APOB PE=1 SV=2	P04114 [3137-3148]	0	135681372	0	1.473	0.964369058686853	110.06	78.8	121.2	117.92	110.88	. Found	. Found	. Found	. Found	. Found	. Found	. Found	. Found	. Found	.	.	. Found	.	.	.	.	.	.	. Found	. Found	. Found	. Found	. Found	. Found	. Found	. Found	. Found	. Found	. Found
	High	[R].LPYTIITTPPLKDFSLWEK.[T]			1,4189E-05	0	91	P04114	Apolipoprotein B-100 OS=Homo sapiens OX=9606 GN=APOB PE=1 SV=2	P04114 [3137-3155]	1	226224203	0	1.866	0.253742613987976	114.54	79.0	121.0	87.91	94.14	.	.	.	.	.	.	.	.	.	.	.	.	.	.	.	.	.	.	.	.	.	.	.	.	.	.	.	.	. Found
	High	[R].LTGKIDFLNNYALFLSPSAQQASWQVSAR.[F]			1,18411E-06	0	22	P04114	Apolipoprotein B-100 OS=Homo sapiens OX=9606 GN=APOB PE=1 SV=2	P04114 [3064-3092]	1	322566912	0	1.968	0.758718671721258	107.78	67.1	132.9	56.92	106.21	. Found	.	.	.	.	. Found	. Found	. Found	. Found	. Found	. Found	.	.	. Found	. Found	.	.	. Found	. Found	. Found	. Found	. Found	. Found	. Found	.	. Found	.	. Found	.
	High	[R].LTLDIQNK.[K]			0,0411847	0,000840285	36	P04114	Apolipoprotein B-100 OS=Homo sapiens OX=9606 GN=APOB PE=1 SV=2	P04114 [1092-1099]	0	94454112	0	1.532	0.674949170551305	96.79	71.1	128.9	92.65	81.46	. Found	. Found	. Found	. Found	. Found	.	. Found	. Found	. Found	.	.	.	.	.	.	.	.	.	. Found	.	.	.	.	.	. Found	. Found	. Found	. Found	. Found
	High	[R].LTLDIQNKK.[I]			0,00772037	0,000750615	99	P04114	Apolipoprotein B-100 OS=Homo sapiens OX=9606 GN=APOB PE=1 SV=2	P04114 [1092-1100]	1	107263609	0	1.242	0.956667336834551	102.67	88.1	111.9	84.82	83.69	.	.	.	.	.	.	.	.	.	.	.	.	.	.	.	.	.	.	.	.	.	.	.	.	.	.	.	.	.
	High	[R].MKALVEQGFTVPEIK.[T]			0,0467296	0,000840285	12	P04114	Apolipoprotein B-100 OS=Homo sapiens OX=9606 GN=APOB PE=1 SV=2	P04114 [2577-2591]	1	168992440	0	1.890	0.743751172095611	92.76	57.5	142.5	48.82	74.89	. Found	. Found	. Found	. Found	. Found	. Found	. Found	. Found	. Found	. Found	.	.	. Found	. Found	. Found	.	. Found	. Found	. Found	. Found	. Found	. Found	. Found	. Found	. Found	. Found	. Found	. Found	. Found
	High	[R].MKALVEQGFTVPEIK.[T]	1xOxidation [M1]		4,37101E-05	0	23	P04114	Apolipoprotein B-100 OS=Homo sapiens OX=9606 GN=APOB PE=1 SV=2	P04114 [2577-2591]	1	170591932	0	1.248	0.999850434146449	105.97	89.0	111.0	118.84	51.51	. Found	. Found	. Found	. Found	. Found	. Found	. Found	. Found	. Found	. Found	. Found	. Found	.	.	.	. Found	. Found	. Found	.	.	.	.	.	.	. Found	. Found	. Found	.	. Found
	High	[R].MNFKQELNGNTK.[S]	1xOxidation [M1]		0,00332608	0,000313424	1	P04114	Apolipoprotein B-100 OS=Homo sapiens OX=9606 GN=APOB PE=1 SV=2	P04114 [3438-3449]	1	143969474	0								. Found	. Found	. Found	. Found	. Found	. Found	. Found	. Found	. Found	. Found	. Found	. Found	.	. Found	. Found	. Found	. Found	. Found	. Found	. Found	. Found	. Found	. Found	. Found	. Found	. Found	. Found	. Found	. Found
	High	[R].MNFKQELNGNTK.[S]			0,000630395	0	27	P04114	Apolipoprotein B-100 OS=Homo sapiens OX=9606 GN=APOB PE=1 SV=2	P04114 [3438-3449]	1	142369982	0	2.552	0.211317744532213	124.20	83.6	116.4	71.47	100.51	. Found	. Found	. Found	. Found	. Found	. Found	. Found	. Found	. Found	. Found	. Found	. Found	.	.	.	.	.	.	. Found	.	.	. Found	. Found	. Found	. Found	. Found	. Found	. Found	. Found
	High	[R].MYQMDIQQELQR.[Y]	1xOxidation [M]		0,00036914	0	79	P04114	Apolipoprotein B-100 OS=Homo sapiens OX=9606 GN=APOB PE=1 SV=2	P04114 [2523-2534]	0	159873014	0	0.866	0.867591694257607	96.39	137.3	62.7	55.28	132.25	.	.	.	.	.	.	. Found	. Found	. Found	.	.	.	.	.	.	.	.	.	. Found	. Found	. Found	. Found	. Found	. Found	.	.	.	.	.
	High	[R].MYQMDIQQELQR.[Y]			0,000733254	0	46	P04114	Apolipoprotein B-100 OS=Homo sapiens OX=9606 GN=APOB PE=1 SV=2	P04114 [2523-2534]	0	158273522	0	1.136	0.988269405054749	133.89	100.5	99.5	85.15	105.11	.	.	.	.	.	.	. Found	. Found	. Found	.	.	.	. Found	. Found	. Found	.	.	.	. Found	. Found	. Found	. Found	. Found	. Found	. Found	. Found	. Found	. Found	. Found
	High	[R].MYQMDIQQELQR.[Y]	2xOxidation [M1; M4]		0,000382022	0	50	P04114	Apolipoprotein B-100 OS=Homo sapiens OX=9606 GN=APOB PE=1 SV=2	P04114 [2523-2534]	0	161472505	0	0.525	0.089032039584883	33.55	113.1	86.9	119.33	70.32	. Found	. Found	. Found	. Found	. Found	. Found	. Found	. Found	. Found	.	.	.	.	.	.	.	.	.	.	.	.	.	.	.	.	.	.	. Found	.
	High	[R].NIQEYLSILTDPDGK.[G]			0,000115788	0	105	P04114	Apolipoprotein B-100 OS=Homo sapiens OX=9606 GN=APOB PE=1 SV=2	P04114 [4447-4461]	0	170586431	0	2.110	0.348982955794239	115.51	77.5	122.5	91.80	89.89	.	.	.	.	.	.	.	.	.	.	.	. Found	.	.	.	.	.	.	.	.	.	.	.	.	.	.	.	.	.
	High	[R].NIQEYLSILTDPDGKGK.[E]			5,678E-06	0	71	P04114	Apolipoprotein B-100 OS=Homo sapiens OX=9606 GN=APOB PE=1 SV=2	P04114 [4447-4463]	1	189098073	0	2.049	0.492719558261791	121.63	66.7	133.3	119.87	81.24	.	.	.	.	.	.	.	.	.	.	.	.	.	.	.	.	.	.	.	.	. Found	. Found	. Found	. Found	.	.	.	. Found	.
	High	[R].NIQEYLSILTDPDGKGKEK.[I]			0,000538346	0	46	P04114	Apolipoprotein B-100 OS=Homo sapiens OX=9606 GN=APOB PE=1 SV=2	P04114 [4447-4465]	2	214811829	0	1.127	0.977134742088879	108.08	103.4	96.6	100.44	94.79	.	.	.	.	.	.	.	.	.	.	.	.	.	.	.	.	.	.	.	.	.	. Found	. Found	. Found	.	.	.	.	. Found
	High	[R].NLKHINIDQFVRK.[Y]			0,105346	0,00354981	2	P04114	Apolipoprotein B-100 OS=Homo sapiens OX=9606 GN=APOB PE=1 SV=2	P04114 [2098-2110]	2	162492818	0	3.608	0.0814635333063529	32.52	35.5	164.5	28.37	9.91	. Found	. Found	. Found	. Found	. Found	. Found	. Found	. Found	. Found	. Found	. Found	. Found	. Found	. Found	. Found	. Found	. Found	. Found	. Found	. Found	. Found	. Found	. Found	. Found	. Found	. Found	. Found	. Found	. Found
	High	[R].NLQNNAEWVYQGAIR.[Q]			7,56725E-05	0	109	P04114	Apolipoprotein B-100 OS=Homo sapiens OX=9606 GN=APOB PE=1 SV=2	P04114 [4107-4121]	0	177588236	0	1.253	0.953537638200151	118.88	93.8	106.2	95.84	104.05	.	.	.	.	.	.	.	.	.	.	.	.	.	.	.	.	.	.	.	.	.	. Found	.	.	.	.	.	.	.
	High	[R].NNALDFVTK.[S]			0,0097219	0,000750615	68	P04114	Apolipoprotein B-100 OS=Homo sapiens OX=9606 GN=APOB PE=1 SV=2	P04114 [3213-3221]	0	102153129	0	1.409	0.806707895181891	116.34	91.8	108.2	98.56	98.70	.	.	.	.	.	.	.	.	.	.	.	.	.	.	.	.	.	.	.	.	.	.	.	.	.	.	.	.	.
	High	[R].NRQTIIVVLENVQR.[N]			0,000140792	0	50	P04114	Apolipoprotein B-100 OS=Homo sapiens OX=9606 GN=APOB PE=1 SV=2	P04114 [2084-2097]	1	168197078	0	1.855	0.745559913349073	115.50	64.9	135.1	107.31	83.49	.	. Found	.	.	.	. Found	. Found	. Found	. Found	.	.	.	.	.	.	.	.	.	.	.	.	.	. Found	.	.	.	.	.	. Found
	High	[R].QIDDIDVR.[F]			0,039612	0,000840285	56	P04114	Apolipoprotein B-100 OS=Homo sapiens OX=9606 GN=APOB PE=1 SV=2	P04114 [4122-4129]	0	97349490	0	1.752	0.366628774464879	117.83	76.5	123.5	93.74	106.67	.	.	.	.	.	.	.	.	.	.	.	.	.	.	.	.	.	.	.	.	.	. Found	. Found	.	.	.	.	.	.
	High	[R].QSMTLSSEVQIPDFDVDLGTILR.[V]	1xOxidation [M3]		2,1288E-06	0	86	P04114	Apolipoprotein B-100 OS=Homo sapiens OX=9606 GN=APOB PE=1 SV=2	P04114 [1056-1078]	0	258028616	0	2.327	0.151561817758757	112.16	63.8	136.2	101.69	79.44	.	.	.	.	.	.	.	.	. Found	.	.	.	.	.	.	.	.	.	. Found	.	.	. Found	.	.	. Found	.	. Found	.	.
	High	[R].QSMTLSSEVQIPDFDVDLGTILR.[V]			4,92859E-05	0	15	P04114	Apolipoprotein B-100 OS=Homo sapiens OX=9606 GN=APOB PE=1 SV=2	P04114 [1056-1078]	0	256429124	0								. Found	.	.	.	.	.	.	. Found	. Found	.	.	. Found	. Found	. Found	. Found	. Found	. Found	. Found	.	. Found	. Found	. Found	. Found	. Found	. Found	. Found	. Found	. Found	. Found
	High	[R].QTIIVVLENVQR.[N]			0,000607037	0	152	P04114	Apolipoprotein B-100 OS=Homo sapiens OX=9606 GN=APOB PE=1 SV=2	P04114 [2086-2097]	0	141182674	0	1.659	0.475605222497624	110.17	83.3	116.7	112.28	92.44	.	.	.	.	.	.	.	.	.	.	.	.	.	.	.	.	.	.	.	.	.	.	.	.	.	.	.	.	.
	High	[R].RNLQNNAEWVYQGAIR.[Q]			0,000111119	0	41	P04114	Apolipoprotein B-100 OS=Homo sapiens OX=9606 GN=APOB PE=1 SV=2	P04114 [4106-4121]	1	193198347	0	1.618	0.887982616367312	109.09	82.7	117.3	81.37	95.86	. Found	. Found	. Found	. Found	. Found	. Found	. Found	. Found	. Found	.	.	.	.	.	.	.	.	.	.	.	. Found	.	. Found	.	. Found	.	.	. Found	.
	High	[R].SEILAHWSPAK.[L]			0,00107519	0	115	P04114	Apolipoprotein B-100 OS=Homo sapiens OX=9606 GN=APOB PE=1 SV=2	P04114 [1135-1145]	0	123865280	0	1.860	0.258812752472984	107.59	74.8	125.2	112.28	83.08	.	.	.	.	.	.	.	.	.	.	.	.	.	.	.	.	.	.	.	.	.	.	.	.	.	.	.	.	.
	High	[R].SEYQADYESLR.[F]			0,00588228	0,000591694	62	P04114	Apolipoprotein B-100 OS=Homo sapiens OX=9606 GN=APOB PE=1 SV=2	P04114 [1600-1610]	0	136060155	0	1.974	0.174225783121445	116.33	71.0	129.0	128.31	96.82	.	.	.	.	. Found	.	.	.	.	.	.	.	.	.	.	.	.	.	.	.	.	.	.	.	.	.	.	.	.
	High	[R].SGVQMNTNFFHESGLEAHVALK.[A]			2,74144E-05	0	41	P04114	Apolipoprotein B-100 OS=Homo sapiens OX=9606 GN=APOB PE=1 SV=2	P04114 [897-918]	0	241617140	0	1.443	0.960093230761888	123.24	91.7	108.3	79.82	85.73	.	.	.	.	.	.	.	.	.	.	.	.	. Found	.	.	. Found	.	.	. Found	. Found	.	. Found	. Found	. Found	. Found	. Found	. Found	.	. Found
	High	[R].SGVQMNTNFFHESGLEAHVALK.[A]	1xOxidation [M5]		5,60063E-06	0	118	P04114	Apolipoprotein B-100 OS=Homo sapiens OX=9606 GN=APOB PE=1 SV=2	P04114 [897-918]	0	243216632	2	2.171	0.0838167754804493	120.47	65.9	134.1	112.72	71.18	.	.	.	.	.	.	. Found	. Found	. Found	.	.	.	.	.	.	.	.	.	.	.	.	.	.	.	.	.	.	.	.
	High	[R].SPSQADINK.[I]			0,00575174	0,000313424	53	P04114	Apolipoprotein B-100 OS=Homo sapiens OX=9606 GN=APOB PE=1 SV=2	P04114 [568-576]	0	95947925	0	1.117	0.983458986076177	130.55	119.0	81.0	55.41	207.20	.	.	.	.	.	.	. Found	.	.	.	. Found	.	.	.	. Found	.	.	.	.	.	.	.	.	.	.	. Found	.	.	.
	High	[R].SPSQADINKIVQILPWEQNEQVK.[N]			8,30912E-06	0	21	P04114	Apolipoprotein B-100 OS=Homo sapiens OX=9606 GN=APOB PE=1 SV=2	P04114 [568-590]	1	266439916	0	1.859	0.815243793329313	68.37	70.2	129.8	37.18	64.85	.	.	.	. Found	.	. Found	. Found	. Found	. Found	.	. Found	.	. Found	. Found	. Found	.	.	. Found	. Found	. Found	. Found	. Found	. Found	. Found	. Found	. Found	. Found	. Found	. Found
	High	[R].SRATLYALSHAVNNYHK.[T]			2,57964E-06	0	36	P04114	Apolipoprotein B-100 OS=Homo sapiens OX=9606 GN=APOB PE=1 SV=2	P04114 [438-454]	1	194500387	0	1.248	0.999209963067217	105.84	88.8	111.2	67.79	95.51	. Found	. Found	. Found	. Found	. Found	. Found	. Found	. Found	. Found	. Found	.	.	.	.	.	.	.	.	. Found	. Found	. Found	. Found	. Found	. Found	. Found	. Found	. Found	.	. Found
	High	[R].SVMAPFTMTIDAHTNGNGK.[L]	1xOxidation [M3]		4,46596E-06	0	22	P04114	Apolipoprotein B-100 OS=Homo sapiens OX=9606 GN=APOB PE=1 SV=2	P04114 [1898-1916]	0	200792627	0	4.508	0.00227640344001448	128.19	23.3	176.7	84.69	65.95	. Found	. Found	. Found	.	.	. Found	. Found	. Found	. Found	.	. Found	.	. Found	. Found	. Found	.	. Found	.	. Found	. Found	. Found	. Found	. Found	. Found	. Found	. Found	. Found	. Found	. Found
	High	[R].SVMAPFTMTIDAHTNGNGK.[L]			1,82891E-05	0	15	P04114	Apolipoprotein B-100 OS=Homo sapiens OX=9606 GN=APOB PE=1 SV=2	P04114 [1898-1916]	0	199193136	0	2.372	0.492629189700705	39.64	51.7	148.3	34.59	12.10	.	.	.	. Found	. Found	. Found	. Found	. Found	. Found	. Found	.	. Found	. Found	. Found	. Found	.	.	.	. Found	. Found	. Found	. Found	. Found	. Found	. Found	. Found	. Found	. Found	. Found
	High	[R].SVMAPFTMTIDAHTNGNGK.[L]	2xOxidation [M3; M8]		2,02714E-05	0	26	P04114	Apolipoprotein B-100 OS=Homo sapiens OX=9606 GN=APOB PE=1 SV=2	P04114 [1898-1916]	0	202392119	0	1.865	0.774079320764817	115.72	77.4	122.6	121.32	41.27	. Found	. Found	. Found	. Found	. Found	. Found	. Found	. Found	. Found	. Found	. Found	. Found	.	.	.	. Found	. Found	. Found	. Found	.	.	. Found	. Found	. Found	.	.	.	.	.
	High	[R].TEHGSEMLFFGNAIEGK.[S]	1xOxidation [M7]		6,06039E-06	0	31	P04114	Apolipoprotein B-100 OS=Homo sapiens OX=9606 GN=APOB PE=1 SV=2	P04114 [2837-2853]	0	188286399	0	0.197	2.21848605473525E-06	4.96	150.6	49.4	149.90	109.15	. Found	. Found	. Found	. Found	. Found	. Found	. Found	. Found	. Found	. Found	. Found	. Found	.	.	.	. Found	. Found	. Found	.	.	.	. Found	.	.	.	.	.	.	.
	High	[R].TEHGSEMLFFGNAIEGK.[S]			8,00871E-07	0	80	P04114	Apolipoprotein B-100 OS=Homo sapiens OX=9606 GN=APOB PE=1 SV=2	P04114 [2837-2853]	0	186686907	0	1.413	0.908940010185694	111.61	84.0	116.0	61.03	116.28	.	.	.	.	.	.	.	. Found	.	.	.	.	.	.	.	.	.	.	.	.	.	. Found	. Found	.	. Found	.	.	.	.
	High	[R].TFQIPGYTVPVVNVEVSPFTIEMSAFGYVFPK.[A]	1xOxidation [M23]		0,0372931	0,000840285	7	P04114	Apolipoprotein B-100 OS=Homo sapiens OX=9606 GN=APOB PE=1 SV=2	P04114 [3245-3276]	0	357981201	0	4.951	0.0140734488740433	125.03	29.8	170.2	63.72	92.21	. Found	. Found	. Found	. Found	. Found	. Found	. Found	. Found	. Found	. Found	. Found	. Found	. Found	. Found	.	. Found	. Found	. Found	. Found	. Found	. Found	. Found	. Found	. Found	. Found	. Found	. Found	. Found	. Found
	High	[R].TFQIPGYTVPVVNVEVSPFTIEMSAFGYVFPK.[A]			0,0105894	0,000750615	6	P04114	Apolipoprotein B-100 OS=Homo sapiens OX=9606 GN=APOB PE=1 SV=2	P04114 [3245-3276]	0	356381709	0	3.820	0.0634526918149007	97.94	71.2	128.8	3.55	103.47	. Found	. Found	. Found	. Found	. Found	. Found	. Found	. Found	. Found	. Found	. Found	. Found	. Found	. Found	. Found	.	.	. Found	. Found	. Found	. Found	. Found	. Found	. Found	. Found	. Found	. Found	. Found	. Found
	High	[R].TGISPLALIK.[G]			0,00581662	0,000591694	103	P04114	Apolipoprotein B-100 OS=Homo sapiens OX=9606 GN=APOB PE=1 SV=2	P04114 [220-229]	0	101264011	0	1.477	0.719408917122883	94.83	75.8	124.2	73.11	84.08	.	.	.	.	.	.	.	.	.	.	.	.	.	.	.	.	.	.	.	.	.	.	.	.	.	.	.	.	.
	High	[R].TIDQMLNSELQWPVPDIYLR.[D]	1xOxidation [M5]		1,23698E-05	0	110	P04114	Apolipoprotein B-100 OS=Homo sapiens OX=9606 GN=APOB PE=1 SV=2	P04114 [2675-2694]	0	244722752	0	1.712	0.826692202448255	121.89	54.1	145.9	131.97	66.66	. Found	. Found	. Found	. Found	. Found	. Found	. Found	. Found	. Found	.	.	.	.	.	.	.	.	.	.	.	.	.	.	.	.	.	.	.	.
	High	[R].TIDQMLNSELQWPVPDIYLR.[D]			5,56234E-06	0	81	P04114	Apolipoprotein B-100 OS=Homo sapiens OX=9606 GN=APOB PE=1 SV=2	P04114 [2675-2694]	0	243123261	0	1.521	0.940378808549486	138.79	72.8	127.2	97.37	110.10	.	.	. Found	.	.	.	.	.	.	.	.	.	.	.	.	.	.	.	. Found	. Found	. Found	. Found	. Found	. Found	.	. Found	. Found	.	.
	High	[R].TLADLTLLDSPIK.[V]			0,000946112	0	10	P04114	Apolipoprotein B-100 OS=Homo sapiens OX=9606 GN=APOB PE=1 SV=2	P04114 [2013-2025]	0	139980427	0	1.483	0.955257224075308	113.94	85.5	114.5	122.74	102.54	. Found	. Found	. Found	. Found	. Found	. Found	. Found	. Found	. Found	. Found	. Found	. Found	.	.	.	. Found	. Found	. Found	.	. Found	. Found	. Found	. Found	. Found	. Found	. Found	. Found	. Found	. Found
	High	[R].TLADLTLLDSPIKVPLLLSEPINIIDALEMR.[D]	1xOxidation [M30]		1,08209E-05	0	16	P04114	Apolipoprotein B-100 OS=Homo sapiens OX=9606 GN=APOB PE=1 SV=2	P04114 [2013-2043]	1	343292737	0	2.718	0.266059783321381	138.27	136.7	63.3	72.71	161.21	. Found	. Found	. Found	. Found	. Found	. Found	. Found	. Found	. Found	. Found	. Found	. Found	. Found	. Found	.	. Found	. Found	. Found	. Found	. Found	. Found	. Found	. Found	. Found	. Found	. Found	. Found	.	.
	High	[R].TLADLTLLDSPIKVPLLLSEPINIIDALEMR.[D]			1,56194E-05	0	3	P04114	Apolipoprotein B-100 OS=Homo sapiens OX=9606 GN=APOB PE=1 SV=2	P04114 [2013-2043]	1	341693246	0	1.093	0.997608994550807	128.30	94.9	105.1	92.92	155.49	. Found	. Found	. Found	. Found	. Found	. Found	. Found	. Found	. Found	. Found	. Found	. Found	. Found	. Found	. Found	. Found	. Found	. Found	. Found	. Found	. Found	. Found	. Found	. Found	. Found	. Found	. Found	. Found	. Found
	High	[R].TLQGIPQMIGEVIR.[K]			0,000489045	0	80	P04114	Apolipoprotein B-100 OS=Homo sapiens OX=9606 GN=APOB PE=1 SV=2	P04114 [805-818]	0	155486722	0	2.127	0.097376096574801	124.86	85.3	114.7	84.05	89.14	.	.	.	.	.	.	. Found	.	.	.	.	.	.	. Found	. Found	.	.	.	. Found	. Found	. Found	. Found	. Found	. Found	. Found	. Found	. Found	. Found	. Found
	High	[R].TLQGIPQMIGEVIR.[K]	1xOxidation [M8]		0,000807393	0	120	P04114	Apolipoprotein B-100 OS=Homo sapiens OX=9606 GN=APOB PE=1 SV=2	P04114 [805-818]	0	157086214	0	1.626	0.514714095621488	133.41	90.8	109.2	114.75	91.38	.	.	.	.	.	.	.	.	.	.	.	.	.	.	.	.	.	.	.	.	.	.	. Found	.	.	.	.	.	.
	High	[R].TLQGIPQMIGEVIRK.[G]			0,000128779	0	50	P04114	Apolipoprotein B-100 OS=Homo sapiens OX=9606 GN=APOB PE=1 SV=2	P04114 [805-819]	1	168296219	0	1.912	0.539791770039126	106.20	72.9	127.1	90.65	78.80	.	.	.	.	.	.	.	.	.	.	.	.	. Found	. Found	. Found	.	.	.	. Found	. Found	. Found	. Found	. Found	. Found	. Found	. Found	. Found	. Found	. Found
	High	[R].TLQGIPQMIGEVIRK.[G]	1xOxidation [M8]		0,000366616	0	50	P04114	Apolipoprotein B-100 OS=Homo sapiens OX=9606 GN=APOB PE=1 SV=2	P04114 [805-819]	1	169895710	0	2.298	0.097376096574801	108.09	68.5	131.5	114.28	64.94	.	.	.	. Found	. Found	. Found	. Found	. Found	. Found	.	.	.	.	.	.	.	. Found	. Found	.	.	.	.	. Found	.	. Found	.	.	.	.
	High	[R].TPALHFK.[S]			0,171563	0,00633877	51	P04114	Apolipoprotein B-100 OS=Homo sapiens OX=9606 GN=APOB PE=1 SV=2	P04114 [1318-1324]	0	81346175	0	1.348	0.870013900485371	100.96	87.0	113.0	67.97	81.28	.	.	.	.	.	.	.	.	.	.	.	.	.	.	.	.	.	.	.	.	.	.	.	.	.	.	.	.	.
	High	[R].TSSFALNLPTLPEVK.[F]			0,000274837	0	88	P04114	Apolipoprotein B-100 OS=Homo sapiens OX=9606 GN=APOB PE=1 SV=2	P04114 [3776-3790]	0	161688940	0	1.594	0.558582443003149	111.91	84.2	115.8	92.37	101.99	.	.	.	.	.	.	.	. Found	.	.	.	.	.	.	.	.	.	.	.	.	.	. Found	.	.	.	.	.	.	.
	High	[R].TSSFALNLPTLPEVKFPEVDVLTK.[Y]			1,66142E-05	0	61	P04114	Apolipoprotein B-100 OS=Homo sapiens OX=9606 GN=APOB PE=1 SV=2	P04114 [3776-3799]	1	264544365	0	3.577	0.0103920897217169	117.62	41.9	158.1	94.53	99.83	.	.	.	.	.	.	. Found	. Found	.	.	.	.	.	.	.	. Found	.	.	. Found	. Found	.	.	.	.	.	.	.	.	.
	High	[R].VAWHYDEEKIEFEWNTGTNVDTK.[K]			1,51583E-06	0	64	P04114	Apolipoprotein B-100 OS=Homo sapiens OX=9606 GN=APOB PE=1 SV=2	P04114 [1165-1187]	1	281128966	0	1.787	0.766627890270153	116.76	97.8	102.2	73.97	96.85	.	.	.	.	.	.	.	. Found	. Found	.	.	.	.	.	.	.	.	.	. Found	.	. Found	. Found	. Found	. Found	.	.	.	.	.
	High	[R].VAWHYDEEKIEFEWNTGTNVDTKK.[M]			1,32937E-05	0	54	P04114	Apolipoprotein B-100 OS=Homo sapiens OX=9606 GN=APOB PE=1 SV=2	P04114 [1165-1188]	2	293938463	0	2.746	0.10227860484932	119.48	43.9	156.1	123.73	84.63	. Found	. Found	. Found	. Found	. Found	.	. Found	. Found	. Found	. Found	.	.	.	.	.	.	.	.	. Found	. Found	. Found	.	.	.	.	.	.	. Found	.
	High	[R].VHANPLLIDVVTYLVALIPEPSAQQLR.[E]			1,47987E-06	0	34	P04114	Apolipoprotein B-100 OS=Homo sapiens OX=9606 GN=APOB PE=1 SV=2	P04114 [401-427]	0	296968225	0	1.402	0.964369058686853	144.36	51.0	149.0	109.92	165.21	. Found	. Found	. Found	. Found	. Found	. Found	. Found	. Found	. Found	.	.	.	. Found	. Found	. Found	.	.	.	. Found	. Found	. Found	. Found	. Found	. Found	. Found	. Found	. Found	.	.
	High	[R].VIGNMGQTMEQLTPELK.[S]	2xOxidation [M5; M9]		0,000158752	0	6	P04114	Apolipoprotein B-100 OS=Homo sapiens OX=9606 GN=APOB PE=1 SV=2	P04114 [491-507]	0	192094053	0	0.407	0.140325344764111	4.43	103.0	97.0	101.72		. Found	. Found	. Found	. Found	. Found	. Found	. Found	. Found	. Found	. Found	. Found	. Found	.	.	.	. Found	. Found	. Found	. Found	. Found	. Found	. Found	. Found	. Found	. Found	. Found	. Found	. Found	. Found
	High	[R].VIGNMGQTMEQLTPELK.[S]			1,89273E-05	0	130	P04114	Apolipoprotein B-100 OS=Homo sapiens OX=9606 GN=APOB PE=1 SV=2	P04114 [491-507]	0	188895070	0	1.287	0.930962402349697	96.79	89.3	110.7	57.76	87.58	.	.	.	.	.	.	.	.	.	.	.	.	.	.	.	.	.	.	.	.	.	.	.	.	.	.	.	.	.
	High	[R].VIGNMGQTMEQLTPELK.[S]	1xOxidation [M]		6,55193E-05	0	164	P04114	Apolipoprotein B-100 OS=Homo sapiens OX=9606 GN=APOB PE=1 SV=2	P04114 [491-507]	0	190494561	0	1.238	0.999850434146449	130.07	98.8	101.2	106.85	114.02	.	. Found	.	.	.	. Found	. Found	. Found	. Found	.	.	.	.	.	.	.	.	.	.	.	. Found	. Found	.	. Found	.	. Found	.	.	.
	High	[R].VLLDQLGTTISFER.[I]			0,00023152	0	77	P04114	Apolipoprotein B-100 OS=Homo sapiens OX=9606 GN=APOB PE=1 SV=2	P04114 [2296-2309]	0	159186900	0	2.109	0.103796112687919	114.65	63.7	136.3	117.74	74.69	.	.	.	.	.	.	. Found	. Found	. Found	.	.	.	.	.	.	.	.	.	.	.	. Found	. Found	. Found	. Found	.	.	.	. Found	.
	High	[R].VNDESTEGKTSYR.[L]			0,000221423	0	7	P04114	Apolipoprotein B-100 OS=Homo sapiens OX=9606 GN=APOB PE=1 SV=2	P04114 [1079-1091]	1	148568159	0	1.460	0.900026467974469	111.79	100.0	100.0	83.52	122.00	. Found	. Found	. Found	. Found	. Found	. Found	. Found	. Found	. Found	. Found	. Found	. Found	. Found	. Found	. Found	. Found	. Found	. Found	. Found	. Found	. Found	. Found	. Found	. Found	. Found	. Found	. Found	. Found	. Found
	High	[R].VNQNLVYESGSLNFSK.[L]			6,66528E-05	0	78	P04114	Apolipoprotein B-100 OS=Homo sapiens OX=9606 GN=APOB PE=1 SV=2	P04114 [2970-2985]	0	179889700	0	1.738	0.810929759445222	117.81	62.4	137.6	95.19	122.28	.	.	.	.	. Found	.	. Found	. Found	. Found	.	.	.	.	.	.	.	.	.	.	.	.	.	.	.	.	.	.	.	. Found
	High	[R].VNQNLVYESGSLNFSKLEIQSQVDSQHVGHSVLTAK.[G]			1,15496E-05	0	48	P04114	Apolipoprotein B-100 OS=Homo sapiens OX=9606 GN=APOB PE=1 SV=2	P04114 [2970-3005]	1	395601483	0	1.643	0.872388239863435	105.50	74.4	125.6	64.68	87.65	.	.	.	.	.	.	. Found	.	. Found	. Found	.	. Found	.	.	.	.	.	.	. Found	.	.	. Found	. Found	. Found	.	.	.	. Found	.
	High	[R].VPQTDMTFR.[H]	1xOxidation [M6]		0,0237416	0,000840285	39	P04114	Apolipoprotein B-100 OS=Homo sapiens OX=9606 GN=APOB PE=1 SV=2	P04114 [1216-1224]	0	111052482	0	0.559	0.133555339759218	34.70	134.9	65.1	94.41	87.06	. Found	. Found	. Found	. Found	. Found	. Found	. Found	. Found	. Found	. Found	. Found	. Found	.	.	.	. Found	. Found	. Found	.	. Found	.	.	.	.	.	.	.	.	.
	High	[R].VPQTDMTFR.[H]			0,0236434	0,000840285	18	P04114	Apolipoprotein B-100 OS=Homo sapiens OX=9606 GN=APOB PE=1 SV=2	P04114 [1216-1224]	0	109452991	0	2.708	0.00944557809675984	111.86	54.3	145.7	89.14	79.99	. Found	.	.	. Found	. Found	. Found	. Found	.	. Found	.	.	.	. Found	. Found	. Found	.	.	.	. Found	. Found	. Found	. Found	. Found	. Found	. Found	. Found	. Found	. Found	. Found
	High	[R].VPSYTLILPSLELPVLHVPR.[N]			4,34507E-06	0	151	P04114	Apolipoprotein B-100 OS=Homo sapiens OX=9606 GN=APOB PE=1 SV=2	P04114 [3292-3311]	0	224331620	0	3.436	0.000402809572046212	117.45	49.0	151.0	85.71	102.74	.	.	.	.	.	.	.	.	.	.	.	.	.	.	.	.	.	.	. Found	.	.	.	.	.	.	.	.	.	.
	High	[R].VRESDEETQIK.[V]			0,00262323	0,000313424	35	P04114	Apolipoprotein B-100 OS=Homo sapiens OX=9606 GN=APOB PE=1 SV=2	P04114 [4045-4055]	1	133365940	0	1.199	0.999209963067217	127.58	121.3	78.7	63.95	133.19	. Found	.	.	.	.	.	. Found	. Found	. Found	. Found	.	.	. Found	.	.	.	. Found	.	. Found	.	. Found	.	.	.	. Found	. Found	.	. Found	. Found
	High	[R].VRESDEETQIKVNWEEEAASGLLTSLK.[D]			7,6332E-07	0	42	P04114	Apolipoprotein B-100 OS=Homo sapiens OX=9606 GN=APOB PE=1 SV=2	P04114 [4045-4071]	2	306153241	0	1.349	0.990981590338927	103.84	88.2	111.8	74.67	88.74	.	. Found	. Found	.	. Found	. Found	. Found	. Found	. Found	.	.	.	.	.	.	.	.	.	. Found	.	. Found	. Found	.	.	.	.	. Found	.	.
	High	[R].VSSFYAK.[G]			0,121	0,00369184	50	P04114	Apolipoprotein B-100 OS=Homo sapiens OX=9606 GN=APOB PE=1 SV=2	P04114 [1492-1498]	0	80141413	0	1.431	0.832614190997697	114.40	84.0	116.0	105.57	80.41	.	.	.	.	.	.	.	.	.	.	.	.	.	.	.	.	.	.	.	.	.	.	.	. Found	.	.	.	.	.
	High	[R].VSTAFVYTK.[N]			0,0116772	0,000750615	64	P04114	Apolipoprotein B-100 OS=Homo sapiens OX=9606 GN=APOB PE=1 SV=2	P04114 [3704-3712]	0	101554587	0	1.770	0.345405036200129	121.11	85.4	114.6	94.68	112.62	.	.	.	.	.	.	. Found	. Found	.	.	.	.	.	.	.	.	.	.	.	.	.	.	.	.	.	.	.	.	.
	High	[R].VSTAFVYTKNPNGYSFSIPVK.[V]			1,16292E-05	0	34	P04114	Apolipoprotein B-100 OS=Homo sapiens OX=9606 GN=APOB PE=1 SV=2	P04114 [3704-3724]	1	231920196	0	1.627	0.905489059685449	88.71	96.0	104.0	54.19	75.31	.	.	.	.	.	.	. Found	. Found	. Found	.	.	. Found	.	.	. Found	.	.	.	. Found	. Found	.	. Found	. Found	. Found	. Found	. Found	. Found	.	.
	High	[R].VTQEFHMK.[V]	1xOxidation [M7]		0,0510219	0,0010353	1	P04114	Apolipoprotein B-100 OS=Homo sapiens OX=9606 GN=APOB PE=1 SV=2	P04114 [4178-4185]	0	103549279	0	4.102	0.0314963815117438	93.60	68.3	131.7	36.90	80.14	. Found	. Found	. Found	. Found	. Found	. Found	. Found	. Found	. Found	. Found	. Found	. Found	. Found	. Found	. Found	. Found	. Found	. Found	. Found	. Found	. Found	. Found	. Found	. Found	. Found	. Found	. Found	. Found	. Found
	High	[R].VTQEFHMK.[V]			0,0201359	0,000840285	51	P04114	Apolipoprotein B-100 OS=Homo sapiens OX=9606 GN=APOB PE=1 SV=2	P04114 [4178-4185]	0	101949788	0	0.968	0.894248690467875	112.09	115.5	84.5	69.05	137.83	.	.	.	.	.	. Found	. Found	. Found	. Found	.	.	.	.	.	.	.	.	.	.	.	.	. Found	. Found	. Found	.	.	.	.	. Found
	High	[R].YEDGTLSLTSTSDLQSGIIK.[N]			5,87615E-06	0	77	P04114	Apolipoprotein B-100 OS=Homo sapiens OX=9606 GN=APOB PE=1 SV=2	P04114 [1537-1556]	0	212806558	0	1.497	0.814568714331598	101.97	73.1	126.9	107.63	79.01	.	.	.	.	.	.	.	.	. Found	.	.	.	.	.	.	.	.	.	.	. Found	.	.	.	.	.	.	.	.	.
	High	[R].YEDGTLSLTSTSDLQSGIIKNTASLK.[Y]			0,10106	0,00302604	2	P04114	Apolipoprotein B-100 OS=Homo sapiens OX=9606 GN=APOB PE=1 SV=2	P04114 [1537-1562]	1	274240436	0								. Found	. Found	. Found	. Found	. Found	. Found	. Found	. Found	. Found	. Found	. Found	. Found	. Found	. Found	. Found	. Found	. Found	. Found	. Found	. Found	. Found	. Found	. Found	. Found	. Found	. Found	. Found	. Found	. Found
	High	[R].YEVDQQIQVLMDK.[L]	1xOxidation [M11]		0,000360382	0	17	P04114	Apolipoprotein B-100 OS=Homo sapiens OX=9606 GN=APOB PE=1 SV=2	P04114 [2348-2360]	0	162478870	0	0.702	0.66263103844477	56.89	114.9	85.1	105.83	78.15	. Found	. Found	. Found	. Found	. Found	. Found	. Found	. Found	. Found	. Found	. Found	. Found	.	.	.	. Found	. Found	. Found	.	.	.	. Found	. Found	. Found	. Found	.	. Found	. Found	. Found
	High	[R].YEVDQQIQVLMDKLVELAHQYK.[L]	1xOxidation [M11]		0,000738313	0	10	P04114	Apolipoprotein B-100 OS=Homo sapiens OX=9606 GN=APOB PE=1 SV=2	P04114 [2348-2369]	1	270638073	0	0.276	0.00582361561108508	5.15	120.9	79.1	124.85	58.69	. Found	. Found	. Found	. Found	. Found	. Found	. Found	. Found	. Found	. Found	. Found	. Found	.	.	.	. Found	. Found	. Found	. Found	. Found	. Found	. Found	. Found	. Found	. Found	.	. Found	. Found	. Found
	High	[R].YHMKADSVVDLLSYNVQGSGETTYDHK.[N]			0,0836906	0,00250817	3	P04114	Apolipoprotein B-100 OS=Homo sapiens OX=9606 GN=APOB PE=1 SV=2	P04114 [1389-1415]	1	305742584	0	100.000	1.18764845605701E-16			200.0		43.11	. Found	. Found	. Found	. Found	. Found	. Found	. Found	. Found	. Found	. Found	. Found	. Found	. Found	. Found	. Found	. Found	. Found	. Found	. Found	. Found	. Found	. Found	. Found	. Found	. Found	. Found	. Found	. Found	. Found
	High	[R].YHMKADSVVDLLSYNVQGSGETTYDHK.[N]	1xOxidation [M3]		1,56478E-07	0	34	P04114	Apolipoprotein B-100 OS=Homo sapiens OX=9606 GN=APOB PE=1 SV=2	P04114 [1389-1415]	1	307342075	0	2.244	0.475265507964445	133.39	57.5	142.5	165.88	57.67	. Found	. Found	. Found	. Found	. Found	. Found	. Found	. Found	. Found	. Found	. Found	. Found	.	.	.	.	.	. Found	.	.	.	. Found	.	. Found	. Found	.	.	. Found	.
	High	[R].YKLQDFSDQLSDYYEK.[F]			2,48412E-06	0	73	P04114	Apolipoprotein B-100 OS=Homo sapiens OX=9606 GN=APOB PE=1 SV=2	P04114 [4497-4512]	1	204193893	0	1.395	0.821913357235241	122.53	100.4	99.6	88.10	89.54	.	.	.	.	.	.	. Found	. Found	.	.	.	.	.	.	.	.	.	.	.	.	.	. Found	. Found	. Found	.	.	.	.	. Found
	High	[R].YKLQDFSDQLSDYYEKFIAESK.[R]			9,36905E-06	0	16	P04114	Apolipoprotein B-100 OS=Homo sapiens OX=9606 GN=APOB PE=1 SV=2	P04114 [4497-4518]	2	271729810	0	1.869	0.751715366311807	117.57	81.4	118.6	41.11	101.55	. Found	. Found	. Found	.	. Found	. Found	. Found	. Found	. Found	. Found	. Found	. Found	. Found	.	. Found	. Found	. Found	. Found	. Found	. Found	. Found	. Found	. Found	. Found	. Found	. Found	. Found	. Found	. Found
	High	[R].YKLQDFSDQLSDYYEKFIAESK.[R]	1xHNE [K]	P04114 1xHNE [K]	0,000111501	0	58	P04114	Apolipoprotein B-100 OS=Homo sapiens OX=9606 GN=APOB PE=1 SV=2	P04114 [4497-4518]	2	287341313	0	1.797	0.750708849082502	120.64	65.6	134.4	79.36	102.05	.	.	.	.	.	.	. Found	. Found	. Found	.	.	.	.	. Found	.	.	.	. Found	. Found	. Found	. Found	. Found	. Found	. Found	.	.	.	.	.
	High	[R].YLSLVGQVYSTLVTYISDWWTLAAK.[N]			0,000584549	0	6	P04114	Apolipoprotein B-100 OS=Homo sapiens OX=9606 GN=APOB PE=1 SV=2	P04114 [2535-2559]	0	287750731	0	0.483	0.475200354337073	33.71	126.3	73.7	36.08	118.24	. Found	. Found	. Found	. Found	. Found	. Found	. Found	. Found	. Found	. Found	. Found	. Found	. Found	. Found	. Found	. Found	. Found	. Found	. Found	. Found	. Found	. Found	. Found	. Found	. Found	. Found	. Found	.	.
	High	[RK].AAIQALR.[RK]			0,20374	0,00721661	122	P04114	Apolipoprotein B-100 OS=Homo sapiens OX=9606 GN=APOB PE=1 SV=2	P04114 [526-532]	0	74245700	0	1.113	0.998019339144021	99.46	102.5	97.5	68.79	85.45	.	.	.	.	.	.	.	.	.	.	.	.	.	.	.	.	.	.	.	.	.	.	.	.	.	.	.	.	.
	High	[RK].QAEAVLK.[KT]			0,201918	0,00721661	50	P04114	Apolipoprotein B-100 OS=Homo sapiens OX=9606 GN=APOB PE=1 SV=2	P04114 [321-327]	0	75844068	0	1.050	0.998019339144021	101.54	101.8	98.2	77.43	84.14	.	.	.	.	.	.	.	.	.	.	.	.	.	.	.	.	.	.	.	.	.	.	. Found	.	.	.	.	.	.
High	Master Protein	P02768	Serum albumin OS=Homo sapiens OX=9606 GN=ALB PE=1 SV=2	93	105	25159	105	609	69,3	6,28	0.991	-0.01	0.718037	.	.	.	.	.	.	.	.	.	.	.	.	.	.	.	.	.	.	.	.	.	.	.	.	.	.	.	.	.	.	.	.	.	.	.	.
	Confidence	Annotated Sequence	Modifications	Modifications in Master Proteins	Qvality PEP	Qvality q-value	# PSMs	Master Protein Accessions	Master Protein Descriptions	Positions in Master Proteins	# Missed Cleavages	Theo. MH+ [Da]	# Razor Quan Results	Abundance Ratio: (HDL) / (Control)	Abundance Ratio Adj. P-Value: (HDL) / (Control)	Abundance Ratio Variability [%]: (HDL) / (Control)	Abundances (Grouped): Control	Abundances (Grouped): HDL	Abundances (Grouped) CV [%]: Control	Abundances (Grouped) CV [%]: HDL	Found in Sample: [S2] F2: Sample, C7, Control, Replicate 1	Found in Sample: [S3] F3: Sample, C7, Control, Replicate 2	Found in Sample: [S4] F4: Sample, C7, Control, Replicate 3	Found in Sample: [S5] F5: Sample, C9, Control, Replicate 1	Found in Sample: [S6] F6: Sample, C9, Control, Replicate 2	Found in Sample: [S7] F7: Sample, C9, Control, Replicate 3	Found in Sample: [S8] F8: Sample, C10, Control, Replicate 1	Found in Sample: [S9] F9: Sample, C10, Control, Replicate 2	Found in Sample: [S10] F10: Sample, C10, Control, Replicate 3	Found in Sample: [S20] F20: Sample, C5, Control, Replicate 1	Found in Sample: [S21] F21: Sample, C5, Control, Replicate 2	Found in Sample: [S22] F22: Sample, C5, Control, Replicate 3	Found in Sample: [S23] F23: Sample, C6, Control, Replicate 1	Found in Sample: [S24] F24: Sample, C6, Control, Replicate 2	Found in Sample: [S25] F25: Sample, C6, Control, Replicate 3	Found in Sample: [S26] F26: Sample, C8, Control, Replicate 1	Found in Sample: [S27] F27: Sample, C8, Control, Replicate 2	Found in Sample: [S28] F28: Sample, C8, Control, Replicate 3	Found in Sample: [S38] F38: Sample, C1, Control, Replicate 1	Found in Sample: [S39] F39: Sample, C1, Control, Replicate 2	Found in Sample: [S40] F40: Sample, C1, Control, Replicate 3	Found in Sample: [S41] F41: Sample, C4, Control, Replicate 1	Found in Sample: [S42] F42: Sample, C4, Control, Replicate 2	Found in Sample: [S43] F43: Sample, C4, Control, Replicate 3	Found in Sample: [S11] F11: Sample, H1, HDL, Replicate 1	Found in Sample: [S12] F12: Sample, H1, HDL, Replicate 2	Found in Sample: [S13] F13: Sample, H1, HDL, Replicate 3	Found in Sample: [S14] F14: Sample, H2, HDL, Replicate 1	Found in Sample: [S15] F15: Sample, H2, HDL, Replicate 2
	High	[K].AACLLPK.[L]	1xCarbamidomethyl [C3]		0,0880221	0,00250817	50	P02768	Serum albumin OS=Homo sapiens OX=9606 GN=ALB PE=1 SV=2	P02768 [199-205]	0	77243857	0	0.790	0.714828472055144	86.83	97.4	102.6	139.81	113.94	. Found	.	.	.	.	.	.	.	.	.	.	. Found	.	.	.	.	.	.	.	.	.	.	.	.	.	.	.	.	.
	High	[K].AAFTECCQAADK.[A]	2xCarbamidomethyl [C6; C7]; 1xHNE [K12]	P02768 1xHNE [K198]	0,0415433	0,000840285	1	P02768	Serum albumin OS=Homo sapiens OX=9606 GN=ALB PE=1 SV=2	P02768 [187-198]	0	152768179	0	0.618	0.318431091370301	15.10	121.2	78.8	14.04	31.94	. Found	. Found	. Found	. Found	. Found	. Found	. Found	. Found	. Found	. Found	. Found	. Found	. Found	. Found	. Found	. Found	. Found	. Found	. Found	. Found	. Found	. Found	. Found	. Found	. Found	. Found	. Found	. Found	. Found
	High	[K].AAFTECCQAADK.[A]	2xCarbamidomethyl [C6; C7]		0,00352467	0,000313424	114	P02768	Serum albumin OS=Homo sapiens OX=9606 GN=ALB PE=1 SV=2	P02768 [187-198]	0	137156676	0	0.812	0.767274944596739	89.27	93.7	106.3	110.28	109.46	.	.	.	.	.	.	.	.	.	.	. Found	.	.	. Found	.	.	.	.	.	.	.	.	.	.	.	.	.	.	.
	High	[K].AAFTECCQAADKAACLLPK.[L]	3xCarbamidomethyl [C6; C7; C15]		1,28131E-06	0	118	P02768	Serum albumin OS=Homo sapiens OX=9606 GN=ALB PE=1 SV=2	P02768 [187-205]	1	212498749	1	1.138	0.992956321661076	138.85	70.6	129.4	204.13	140.08	.	.	.	.	.	.	.	.	.	. Found	. Found	. Found	.	.	.	.	. Found	.	.	.	.	.	.	.	.	.	.	.	.
	High	[K].ADDKETCFAEEGK.[K]	1xCarbamidomethyl [C7]		0,000145206	0	86	P02768	Serum albumin OS=Homo sapiens OX=9606 GN=ALB PE=1 SV=2	P02768 [585-597]	1	149963186	0	1.979	0.17062938618157	125.64	69.9	130.1	150.51	84.54	.	.	.	.	.	.	.	.	.	.	. Found	. Found	.	.	.	.	.	.	.	.	.	.	.	.	.	.	.	.	.
	High	[K].ADDKETCFAEEGKK.[L]	1xCarbamidomethyl [C7]		8,04921E-05	0	375	P02768	Serum albumin OS=Homo sapiens OX=9606 GN=ALB PE=1 SV=2	P02768 [585-598]	2	162772683	0	0.551	0.0990402688037089	42.58	129.2	70.8	122.51	156.41	.	.	.	.	.	.	.	.	.	. Found	.	.	. Found	.	.	.	.	.	.	.	.	.	.	.	.	.	.	.	.
	High	[K].AEFAEVSK.[L]			0,160942	0,00604328	41	P02768	Serum albumin OS=Homo sapiens OX=9606 GN=ALB PE=1 SV=2	P02768 [250-257]	0	88044107	0	0.757	0.632476149423012	80.84	100.0	100.0	128.89	124.96	.	.	.	.	.	.	.	.	.	. Found	. Found	. Found	. Found	.	.	. Found	. Found	. Found	.	.	.	.	.	.	.	.	.	.	.
	High	[K].AEFAEVSKLVTDLTK.[V]			0,00011901	0	19	P02768	Serum albumin OS=Homo sapiens OX=9606 GN=ALB PE=1 SV=2	P02768 [250-264]	1	165089488	0	3.785	0.0814635333063529	135.57	35.5	164.5	153.14	104.25	. Found	.	.	.	.	.	.	.	.	. Found	. Found	. Found	. Found	. Found	. Found	. Found	. Found	. Found	. Found	. Found	. Found	. Found	. Found	. Found	. Found	. Found	. Found	.	. Found
	High	[K].ALVLIAFAQYLQQCPFEDHVK.[L]	1xCarbamidomethyl [C14]		4,27118E-06	0	158	P02768	Serum albumin OS=Homo sapiens OX=9606 GN=ALB PE=1 SV=2	P02768 [45-65]	0	249028498	0	1.488	0.701998360494334	123.23	69.9	130.1	102.17	155.06	.	.	.	.	.	.	.	.	.	.	.	.	.	.	.	.	.	.	.	.	.	.	.	.	.	.	.	.	.
	High	[K].ATKEQLK.[A]			0,0848493	0,00250817	21	P02768	Serum albumin OS=Homo sapiens OX=9606 GN=ALB PE=1 SV=2	P02768 [563-569]	1	81747779	0	0.770	0.528744984673346	80.29	112.8	87.2	108.80	120.28	. Found	. Found	. Found	. Found	. Found	. Found	.	.	.	. Found	. Found	. Found	. Found	. Found	. Found	. Found	. Found	. Found	.	.	. Found	.	.	.	.	. Found	.	.	.
	High	[K].ATKEQLKAVMDDFAAFVEK.[C]			7,3691E-06	0	11	P02768	Serum albumin OS=Homo sapiens OX=9606 GN=ALB PE=1 SV=2	P02768 [563-581]	2	214109472	0	1.441	0.968093602891856	35.17	72.0	128.0	50.50		. Found	. Found	. Found	. Found	. Found	. Found	.	.	.	. Found	. Found	. Found	. Found	. Found	. Found	. Found	. Found	. Found	. Found	. Found	. Found	. Found	. Found	. Found	. Found	. Found	. Found	. Found	. Found
	High	[K].ATKEQLKAVMDDFAAFVEK.[C]	1xCarbamyl [K]	P02768 1xCarbamyl [K]	0,00084727	0	5	P02768	Serum albumin OS=Homo sapiens OX=9606 GN=ALB PE=1 SV=2	P02768 [563-581]	2	218410053	0	0.944	0.992956321661076	80.19	96.8	103.2	111.25	60.11	. Found	. Found	. Found	. Found	. Found	. Found	. Found	.	.	. Found	. Found	. Found	. Found	. Found	. Found	. Found	. Found	. Found	. Found	. Found	. Found	. Found	. Found	. Found	. Found	. Found	. Found	. Found	. Found
	High	[K].AVMDDFAAFVEK.[C]			0,00135205	0	445	P02768	Serum albumin OS=Homo sapiens OX=9606 GN=ALB PE=1 SV=2	P02768 [570-581]	0	134263476	0	1.015	0.987093671297076	135.32	98.3	101.7	114.17	105.27	.	.	.	.	.	.	.	.	.	.	.	.	.	.	.	.	.	.	.	.	.	.	.	.	.	.	.	.	.
	High	[K].AVMDDFAAFVEK.[C]	1xOxidation [M3]		0,00138062	0	876	P02768	Serum albumin OS=Homo sapiens OX=9606 GN=ALB PE=1 SV=2	P02768 [570-581]	0	135862968	0	1.016	0.988569445200929	135.92	77.1	122.9	111.96	103.32	.	.	.	.	.	.	.	.	.	.	.	.	.	.	.	.	.	.	.	.	.	.	.	.	.	.	.	.	.
	High	[K].AVMDDFAAFVEK.[C]	1xHNE [K12]	P02768 1xHNE [K581]	0,00275805	0,000313424	1	P02768	Serum albumin OS=Homo sapiens OX=9606 GN=ALB PE=1 SV=2	P02768 [570-581]	0	149874979	0	0.917	0.964369058686853	100.72	91.0	109.0	139.21	67.93	. Found	. Found	. Found	. Found	. Found	. Found	. Found	. Found	. Found	. Found	. Found	. Found	. Found	. Found	. Found	. Found	. Found	. Found	. Found	. Found	. Found	. Found	. Found	. Found	. Found	.	. Found	. Found	. Found
	High	[K].CCAAADPHECYAK.[V]	3xCarbamidomethyl [C1; C2; C10]		0,000162053	0	170	P02768	Serum albumin OS=Homo sapiens OX=9606 GN=ALB PE=1 SV=2	P02768 [384-396]	0	155259774	0	0.723	0.526575190653985	75.42	123.0	77.0	124.85	138.66	.	.	.	.	.	.	.	.	.	.	.	.	.	.	.	.	.	.	.	.	.	.	.	.	.	.	.	.	.
	High	[K].CCAAADPHECYAKVFDEFKPLVEEPQNLIK.[Q]	3xCarbamidomethyl [C1; C2; C10]; 2xHNE [H8; K13]	P02768 2xHNE [H391; K396]	0,19216	0,00643402	1	P02768	Serum albumin OS=Homo sapiens OX=9606 GN=ALB PE=1 SV=2	P02768 [384-413]	1	389090533	0								. Found	. Found	. Found	. Found	. Found	. Found	. Found	. Found	. Found	. Found	. Found	. Found	. Found	. Found	. Found	. Found	. Found	. Found	. Found	. Found	. Found	. Found	. Found	. Found	. Found	. Found	. Found	. Found	. Found
	High	[K].CCKADDKETCFAEEGK.[K]	3xCarbamidomethyl [C1; C2; C10]		0,000108111	0	9	P02768	Serum albumin OS=Homo sapiens OX=9606 GN=ALB PE=1 SV=2	P02768 [582-597]	2	194778812	0	0.389	0.138866854456415	15.28	140.5	59.5	87.96	102.88	. Found	. Found	. Found	. Found	. Found	. Found	.	.	.	. Found	. Found	. Found	. Found	. Found	. Found	. Found	. Found	. Found	. Found	. Found	. Found	. Found	. Found	. Found	. Found	. Found	. Found	. Found	. Found
	High	[K].CCKHPEAK.[R]	2xCarbamidomethyl [C1; C2]		0,115539	0,00369184	14	P02768	Serum albumin OS=Homo sapiens OX=9606 GN=ALB PE=1 SV=2	P02768 [461-468]	1	102946045	0	3.592	0.0623018211444629	146.06	47.6	152.4	139.06	160.69	.	.	.	. Found	. Found	. Found	. Found	. Found	. Found	. Found	. Found	. Found	. Found	. Found	. Found	. Found	. Found	. Found	. Found	.	. Found	. Found	. Found	. Found	.	.	. Found	.	.
	High	[K].CCTESLVNR.[R]	2xCarbamidomethyl [C1; C2]		0,00754596	0,000591694	219	P02768	Serum albumin OS=Homo sapiens OX=9606 GN=ALB PE=1 SV=2	P02768 [500-508]	0	113849795	0	0.759	0.637581078731877	79.77	96.5	103.5	115.65	105.33	.	.	.	.	.	.	.	.	.	.	.	.	.	.	.	.	.	.	.	.	.	.	.	.	.	.	.	.	.
	High	[K].CCTESLVNRRPCFSALEVDETYVPK.[E]	3xCarbamidomethyl [C1; C2; C12]		9,16986E-05	0	44	P02768	Serum albumin OS=Homo sapiens OX=9606 GN=ALB PE=1 SV=2	P02768 [500-524]	1	303041179	0	0.364	0.00269276055161723	18.85	71.0	129.0	184.67	157.58	.	.	.	.	.	.	.	.	.	. Found	. Found	. Found	. Found	. Found	. Found	. Found	. Found	. Found	. Found	. Found	. Found	. Found	. Found	. Found	.	.	.	.	.
	High	[K].DDNPNLPR.[L]			0,0681912	0,00158954	84	P02768	Serum albumin OS=Homo sapiens OX=9606 GN=ALB PE=1 SV=2	P02768 [131-138]	0	94044828	0	0.901	0.921646688612003	111.63	99.6	100.4	123.90	120.79	.	.	.	.	.	.	.	.	.	. Found	. Found	. Found	.	. Found	. Found	.	.	. Found	.	.	.	.	.	.	.	.	.	.	.
	High	[K].DLGEENFKALVLIAFAQYLQQCPFEDHVK.[L]	1xCarbamidomethyl [C22]		2,22385E-05	0	11	P02768	Serum albumin OS=Homo sapiens OX=9606 GN=ALB PE=1 SV=2	P02768 [37-65]	1	342270894	0	0.604	0.751821550198597	44.27	117.5	82.5	112.75	228.88	. Found	. Found	. Found	. Found	. Found	. Found	. Found	.	.	. Found	. Found	. Found	. Found	. Found	. Found	. Found	. Found	. Found	. Found	. Found	. Found	. Found	. Found	. Found	. Found	. Found	. Found	.	.
	High	[K].DVCKNYAEAK.[D]	1xCarbamidomethyl [C3]		0,00626957	0,000591694	63	P02768	Serum albumin OS=Homo sapiens OX=9606 GN=ALB PE=1 SV=2	P02768 [338-347]	1	119755685	0	1.206	0.999209963067217	147.68	96.4	103.6	192.13	205.79	.	.	.	.	.	.	.	.	.	. Found	. Found	. Found	. Found	. Found	. Found	.	.	.	.	. Found	. Found	.	.	. Found	.	.	.	.	.
	High	[K].DVCKNYAEAKDVFLGMFLYEYAR.[R]	1xCarbamidomethyl [C3]; 1xOxidation [M16]		5,65342E-05	0	11	P02768	Serum albumin OS=Homo sapiens OX=9606 GN=ALB PE=1 SV=2	P02768 [338-360]	2	281832150	0	0.551	0.105199587328424	19.11	100.5	99.5	98.60	50.31	. Found	. Found	. Found	. Found	. Found	. Found	.	.	.	. Found	. Found	. Found	. Found	. Found	. Found	. Found	. Found	. Found	. Found	. Found	. Found	. Found	. Found	. Found	. Found	. Found	. Found	. Found	. Found
	High	[K].DVCKNYAEAKDVFLGMFLYEYAR.[R]	1xCarbamidomethyl [C3]		6,54137E-07	0	66	P02768	Serum albumin OS=Homo sapiens OX=9606 GN=ALB PE=1 SV=2	P02768 [338-360]	2	280232658	0	2.089	0.463288762410152	147.10	37.1	162.9	223.15	133.54	.	.	.	.	.	.	.	.	.	. Found	. Found	. Found	. Found	. Found	. Found	. Found	. Found	. Found	. Found	.	. Found	. Found	. Found	. Found	.	.	.	.	.
	High	[K].DVCKNYAEAKDVFLGMFLYEYAR.[R]	1xCarbamidomethyl [C3]; 1xHNE [K10]	P02768 1xHNE [K347]	0,0716717	0,00158954	5	P02768	Serum albumin OS=Homo sapiens OX=9606 GN=ALB PE=1 SV=2	P02768 [338-360]	2	295844161	0	0.396	0.00682372572899921	18.71	135.4	64.6	113.29	35.77	. Found	. Found	. Found	. Found	. Found	. Found	.	. Found	. Found	. Found	. Found	. Found	. Found	. Found	. Found	. Found	. Found	. Found	. Found	. Found	. Found	. Found	. Found	. Found	. Found	. Found	. Found	. Found	. Found
	High	[K].DVFLGMFLYEYAR.[R]	1xOxidation [M6]		0,000271091	0	278	P02768	Serum albumin OS=Homo sapiens OX=9606 GN=ALB PE=1 SV=2	P02768 [348-360]	0	163978249	0	1.207	0.968093602891856	141.10	87.5	112.5	127.79	138.60	.	.	.	.	.	.	.	.	.	.	.	.	.	.	.	.	.	.	.	.	.	.	.	.	.	.	.	.	.
	High	[K].DVFLGMFLYEYAR.[R]			0,000226804	0	252	P02768	Serum albumin OS=Homo sapiens OX=9606 GN=ALB PE=1 SV=2	P02768 [348-360]	0	162378758	0	1.192	0.97619640388844	135.19	78.7	121.3	166.81	147.65	.	.	.	.	.	.	.	.	.	.	.	.	.	.	.	.	.	.	.	.	.	.	.	.	.	.	.	.	.
	High	[K].ECCEKPLLEK.[S]	2xCarbamidomethyl [C2; C3]		0,00245996	0,000313424	98	P02768	Serum albumin OS=Homo sapiens OX=9606 GN=ALB PE=1 SV=2	P02768 [301-310]	0	130561773	0	0.784	0.697664165682589	87.19	112.9	87.1	125.38	115.84	.	.	.	.	.	.	.	.	.	.	.	.	.	.	.	.	.	.	.	.	.	.	.	.	.	.	.	.	.
	High	[K].EFNAETFTFHADICTLSEK.[E]	1xCarbamidomethyl [C14]		9,53978E-07	0	518	P02768	Serum albumin OS=Homo sapiens OX=9606 GN=ALB PE=1 SV=2	P02768 [525-543]	0	226002267	0	1.040	0.99566057015969	134.42	81.8	118.2	138.73	94.03	.	.	.	.	.	.	.	.	.	.	.	.	.	.	.	.	.	.	.	.	.	.	.	.	.	.	.	.	.
	High	[K].EFNAETFTFHADICTLSEKER.[Q]	1xCarbamidomethyl [C14]		7,42657E-07	0	400	P02768	Serum albumin OS=Homo sapiens OX=9606 GN=ALB PE=1 SV=2	P02768 [525-545]	1	254516638	0	0.971	0.968093602891856	127.45	84.2	115.8	137.91	100.41	.	.	.	.	.	.	.	.	.	.	.	.	.	.	.	.	.	.	.	.	.	.	.	.	.	.	.	.	.
	High	[K].EQLKAVMDDFAAFVEK.[C]			1,08209E-05	0	25	P02768	Serum albumin OS=Homo sapiens OX=9606 GN=ALB PE=1 SV=2	P02768 [566-581]	1	184091496	0	0.534	0.10777699015032	39.12	122.4	77.6	176.12	156.58	. Found	. Found	.	.	.	.	.	.	.	. Found	. Found	. Found	. Found	. Found	. Found	. Found	. Found	. Found	. Found	.	. Found	. Found	. Found	. Found	. Found	.	.	.	.
	High	[K].EQLKAVMDDFAAFVEK.[C]	1xOxidation [M7]		0,00313923	0,000313424	29	P02768	Serum albumin OS=Homo sapiens OX=9606 GN=ALB PE=1 SV=2	P02768 [566-581]	1	185690988	0	0.557	0.100299513054523	15.32	135.5	64.5	23.93	71.57	. Found	. Found	. Found	. Found	. Found	. Found	. Found	.	.	. Found	. Found	. Found	. Found	. Found	. Found	. Found	. Found	. Found	.	.	.	.	.	.	.	.	. Found	.	.
	High	[K].EQLKAVMDDFAAFVEK.[C]	1xCarbamyl [K4]	P02768 1xCarbamyl [K569]	0,00135677	0	15	P02768	Serum albumin OS=Homo sapiens OX=9606 GN=ALB PE=1 SV=2	P02768 [566-581]	1	188392078	0	1.435	0.933122110873311	121.71	92.3	107.7	81.52	83.63	. Found	. Found	. Found	. Found	. Found	. Found	.	.	.	. Found	. Found	. Found	. Found	. Found	. Found	. Found	. Found	. Found	. Found	.	.	.	. Found	. Found	. Found	. Found	. Found	. Found	. Found
	High	[K].ETCFAEEGKK.[L]	1xCarbamidomethyl [C3]		0,0185587	0,000840285	49	P02768	Serum albumin OS=Homo sapiens OX=9606 GN=ALB PE=1 SV=2	P02768 [589-598]	1	119854086	0	0.895	0.812492880192187	103.80	102.0	98.0	164.74	146.56	.	.	.	.	.	.	.	.	.	. Found	. Found	. Found	. Found	. Found	. Found	. Found	. Found	. Found	. Found	.	.	. Found	.	. Found	.	.	.	.	.
	High	[K].FQNALLVR.[Y]			0,0319776	0,000840285	325	P02768	Serum albumin OS=Homo sapiens OX=9606 GN=ALB PE=1 SV=2	P02768 [427-434]	0	96056253	0	0.966	0.96595180243873	124.08	93.6	106.4	110.35	101.17	.	.	.	.	.	.	.	.	.	.	.	.	.	.	.	.	.	.	.	.	.	.	.	.	.	.	.	.	.
	High	[K].KLVAASQAALGL.[-]			0,0726539	0,00158954	52	P02768	Serum albumin OS=Homo sapiens OX=9606 GN=ALB PE=1 SV=2	P02768 [598-609]	1	114169393	0	1.196	0.974874541096762	135.94	80.6	119.4	146.92	123.68	.	.	.	.	.	.	.	.	.	.	.	. Found	.	.	.	.	.	.	.	.	.	.	.	.	.	. Found	.	.	.
	High	[K].KQTALVELVK.[H]	1xCarbamyl [K1]	P02768 1xCarbamyl [K549]	0,00622263	0,000591694	10	P02768	Serum albumin OS=Homo sapiens OX=9606 GN=ALB PE=1 SV=2	P02768 [549-558]	1	117170450	0	0.506	0.0704915117998153	34.08	104.0	96.0	86.08	128.30	. Found	.	. Found	. Found	. Found	. Found	. Found	. Found	. Found	. Found	. Found	. Found	. Found	. Found	. Found	. Found	. Found	. Found	.	.	.	. Found	. Found	. Found	. Found	. Found	. Found	. Found	. Found
	High	[K].KQTALVELVK.[H]	1xHNE [K10]	P02768 1xHNE [K558]	0,0155378	0,000750615	1	P02768	Serum albumin OS=Homo sapiens OX=9606 GN=ALB PE=1 SV=2	P02768 [549-558]	1	128481372	0								. Found	. Found	. Found	. Found	. Found	. Found	.	. Found	. Found	. Found	. Found	. Found	. Found	. Found	. Found	. Found	. Found	. Found	. Found	. Found	. Found	. Found	. Found	. Found	. Found	. Found	. Found	. Found	. Found
	High	[K].KQTALVELVK.[H]			0,000531009	0	237	P02768	Serum albumin OS=Homo sapiens OX=9606 GN=ALB PE=1 SV=2	P02768 [549-558]	1	112869869	0	0.873	0.875099930645103	105.79	95.4	104.6	131.49	124.67	.	.	.	.	.	.	.	.	.	.	.	.	.	.	.	.	.	.	.	.	.	.	.	.	.	.	.	.	.
	High	[K].KVPQVSTPTLVEVSR.[N]	1xCarbamyl [K1]	P02768 1xCarbamyl [K438]	0,00373581	0,000313424	4	P02768	Serum albumin OS=Homo sapiens OX=9606 GN=ALB PE=1 SV=2	P02768 [438-452]	1	168294356	0	0.187	0.00123989861447958	1.56	120.0	80.0	103.75		. Found	. Found	. Found	. Found	. Found	. Found	.	.	.	. Found	. Found	. Found	. Found	. Found	. Found	. Found	. Found	. Found	. Found	. Found	. Found	. Found	. Found	. Found	. Found	. Found	. Found	. Found	. Found
	High	[K].KVPQVSTPTLVEVSR.[N]	1xHNE [K1]	P02768 1xHNE [K438]	0,0137841	0,000750615	2	P02768	Serum albumin OS=Homo sapiens OX=9606 GN=ALB PE=1 SV=2	P02768 [438-452]	1	179605278	0	0.819	0.964369058686853	7.37	110.9	89.1			. Found	. Found	. Found	. Found	. Found	. Found	. Found	.	.	. Found	. Found	. Found	. Found	. Found	. Found	. Found	. Found	. Found	. Found	. Found	. Found	. Found	. Found	. Found	. Found	. Found	. Found	. Found	. Found
	High	[K].KVPQVSTPTLVEVSR.[N]			0,000182725	0	520	P02768	Serum albumin OS=Homo sapiens OX=9606 GN=ALB PE=1 SV=2	P02768 [438-452]	1	163993775	0	0.994	0.977134742088879	134.60	87.6	112.4	123.23	102.12	.	.	.	.	.	.	.	.	.	.	.	.	.	.	.	.	.	.	.	.	.	.	.	.	.	.	.	.	.
	High	[K].KVPQVSTPTLVEVSRNLGK.[V]			0,00110538	0	5	P02768	Serum albumin OS=Homo sapiens OX=9606 GN=ALB PE=1 SV=2	P02768 [438-456]	2	205218116	0	0.681	0.848676301269498	46.65	134.3	65.7	70.71	82.78	. Found	. Found	. Found	. Found	. Found	. Found	.	.	.	. Found	. Found	. Found	. Found	. Found	. Found	. Found	. Found	. Found	. Found	. Found	. Found	. Found	. Found	. Found	. Found	. Found	. Found	. Found	. Found
	High	[K].KYLYEIAR.[R]	1xCarbamyl [K1]	P02768 1xCarbamyl [K161]	0,0876188	0,00250817	1	P02768	Serum albumin OS=Homo sapiens OX=9606 GN=ALB PE=1 SV=2	P02768 [161-168]	1	109859422	0								. Found	. Found	. Found	. Found	. Found	. Found	.	. Found	. Found	. Found	. Found	. Found	. Found	. Found	. Found	. Found	. Found	. Found	. Found	. Found	. Found	. Found	. Found	. Found	. Found	. Found	. Found	. Found	. Found
	High	[K].KYLYEIAR.[R]			0,0238402	0,000840285	82	P02768	Serum albumin OS=Homo sapiens OX=9606 GN=ALB PE=1 SV=2	P02768 [161-168]	1	105558841	0	0.775	0.674713289414514	83.94	110.2	89.8	132.45	117.03	.	.	.	.	.	.	.	.	.	. Found	. Found	. Found	.	.	.	.	.	. Found	.	.	.	.	.	.	.	.	.	.	.
	High	[K].LCTVATLR.[E]	1xCarbamidomethyl [C2]		0,0318421	0,000840285	114	P02768	Serum albumin OS=Homo sapiens OX=9606 GN=ALB PE=1 SV=2	P02768 [98-105]	0	93351861	0	0.860	0.859523509107308	101.01	97.1	102.9	113.85	102.12	.	.	.	.	.	.	.	.	.	.	.	.	.	.	.	.	.	.	.	.	.	.	.	.	.	.	.	.	.
	High	[K].LCTVATLRETYGEMADCCAK.[Q]	3xCarbamidomethyl [C2; C17; C18]		4,70603E-07	0	40	P02768	Serum albumin OS=Homo sapiens OX=9606 GN=ALB PE=1 SV=2	P02768 [98-117]	1	234903418	0	0.531	0.102864053455648	37.56	129.7	70.3	154.81	122.00	.	.	.	.	.	.	.	.	.	. Found	. Found	. Found	. Found	. Found	. Found	. Found	. Found	. Found	.	.	.	. Found	. Found	. Found	.	.	.	.	.
	High	[K].LCTVATLRETYGEMADCCAK.[Q]	3xCarbamidomethyl [C2; C17; C18]; 1xOxidation [M14]		0,0163711	0,000750615	2	P02768	Serum albumin OS=Homo sapiens OX=9606 GN=ALB PE=1 SV=2	P02768 [98-117]	1	236502910	0								. Found	. Found	. Found	. Found	. Found	. Found	. Found	. Found	. Found	. Found	. Found	. Found	. Found	. Found	. Found	. Found	. Found	. Found	. Found	. Found	. Found	. Found	. Found	. Found	. Found	. Found	. Found	. Found	. Found
	High	[K].LDELRDEGK.[A]			0,00504916	0,000313424	238	P02768	Serum albumin OS=Homo sapiens OX=9606 GN=ALB PE=1 SV=2	P02768 [206-214]	1	107454258	1	0.840	0.82543370256754	101.06	115.4	84.6	105.97	147.33	.	.	.	.	.	.	.	.	.	.	.	.	. Found	.	.	.	.	.	.	.	.	.	.	.	.	.	.	.	.
	High	[K].LDELRDEGKASSAK.[Q]			0,000331902	0	52	P02768	Serum albumin OS=Homo sapiens OX=9606 GN=ALB PE=1 SV=2	P02768 [206-219]	2	151877583	0	0.356	0.00542953044125719	17.69	183.1	16.9	130.38	191.05	.	.	.	.	.	.	.	.	.	. Found	. Found	. Found	. Found	. Found	. Found	. Found	. Found	. Found	. Found	.	.	.	.	.	.	. Found	.	. Found	.
	High	[K].LKECCEKPLLEK.[S]	2xCarbamidomethyl [C4; C5]		5,61477E-05	0	259	P02768	Serum albumin OS=Homo sapiens OX=9606 GN=ALB PE=1 SV=2	P02768 [299-310]	1	154679676	0	0.689	0.43022630314912	66.71	108.9	91.1	116.57	108.08	.	.	.	.	.	.	.	.	.	.	.	.	.	.	.	.	.	.	.	.	.	.	.	.	.	.	.	.	.
	High	[K].LKECCEKPLLEKSHCIAEVENDEMPADLPSLAADFVESK.[D]	3xCarbamidomethyl [C4; C5; C15]		0,173922	0,00633877	2	P02768	Serum albumin OS=Homo sapiens OX=9606 GN=ALB PE=1 SV=2	P02768 [299-337]	2	450212340	0								. Found	. Found	. Found	. Found	. Found	. Found	.	. Found	. Found	. Found	. Found	. Found	. Found	. Found	. Found	. Found	. Found	. Found	. Found	. Found	. Found	. Found	. Found	. Found	. Found	. Found	. Found	. Found	. Found
	High	[K].LKECCEKPLLEKSHCIAEVENDEMPADLPSLAADFVESK.[D]	3xCarbamidomethyl [C4; C5; C15]; 1xCarbamyl [K]	P02768 1xCarbamyl [K]	0,00234868	0,000313424	8	P02768	Serum albumin OS=Homo sapiens OX=9606 GN=ALB PE=1 SV=2	P02768 [299-337]	2	454512921	0	1.137	0.98039981659082	0.00	93.6	106.4			. Found	. Found	. Found	. Found	. Found	. Found	. Found	. Found	.	. Found	. Found	. Found	. Found	. Found	. Found	. Found	. Found	. Found	. Found	. Found	.	. Found	. Found	. Found	. Found	. Found	. Found	. Found	. Found
	High	[K].LKECCEKPLLEKSHCIAEVENDEMPADLPSLAADFVESK.[D]	3xCarbamidomethyl [C4; C5; C15]; 1xCarbamyl [K]; 1xOxidation [M24]; 1xHNE [K/H]	P02768 1xCarbamyl [K]; 1xHNE [K/H]	0,0168395	0,000750615	44	P02768	Serum albumin OS=Homo sapiens OX=9606 GN=ALB PE=1 SV=2	P02768 [299-337]	2	471723916	0	1.111	0.979031584670884	21.02	97.3	102.7			. Found	. Found	. Found	. Found	. Found	. Found	.	. Found	. Found	. Found	. Found	. Found	. Found	. Found	. Found	. Found	. Found	. Found	. Found	. Found	. Found	. Found	. Found	. Found	. Found	. Found	. Found	.	.
	High	[K].LKECCEKPLLEKSHCIAEVENDEMPADLPSLAADFVESK.[D]	3xCarbamidomethyl [C4; C5; C15]; 2xCarbamyl [K7; K]	P02768 2xCarbamyl [K305; K]	0,0202185	0,000840285	5	P02768	Serum albumin OS=Homo sapiens OX=9606 GN=ALB PE=1 SV=2	P02768 [299-337]	2	458813503	0								. Found	.	. Found	. Found	. Found	. Found	. Found	. Found	. Found	. Found	. Found	. Found	. Found	. Found	. Found	. Found	. Found	. Found	. Found	. Found	. Found	. Found	. Found	. Found	.	.	. Found	. Found	. Found
	High	[K].LVNEVTEFAK.[T]			0,00246875	0,000313424	657	P02768	Serum albumin OS=Homo sapiens OX=9606 GN=ALB PE=1 SV=2	P02768 [66-75]	0	114961502	1	0.989	0.977134742088879	132.68	90.6	109.4	110.05	100.05	.	.	.	.	.	.	.	.	.	.	.	.	.	.	.	.	.	.	.	.	.	.	.	.	.	.	.	.	.
	High	[K].LVTDLTK.[V]			0,0628843	0,00141145	217	P02768	Serum albumin OS=Homo sapiens OX=9606 GN=ALB PE=1 SV=2	P02768 [258-264]	0	78947165	9	1.121	0.997205356449532	115.76	88.8	111.2	109.54	97.48	.	.	.	.	.	.	.	.	.	.	.	.	.	.	.	.	.	.	.	.	.	.	.	.	.	.	.	.	.
	High	[K].NYAEAKDVFLGMFLYEYAR.[R]			1,75675E-06	0	169	P02768	Serum albumin OS=Homo sapiens OX=9606 GN=ALB PE=1 SV=2	P02768 [342-360]	1	230010562	0	1.857	0.26112308845087	143.63	47.0	153.0	224.56	102.82	.	.	.	.	.	.	.	.	.	.	.	. Found	. Found	. Found	.	.	.	.	.	.	.	.	.	. Found	.	.	.	.	.
	High	[K].NYAEAKDVFLGMFLYEYAR.[R]	1xOxidation [M12]		1,31576E-05	0	120	P02768	Serum albumin OS=Homo sapiens OX=9606 GN=ALB PE=1 SV=2	P02768 [342-360]	1	231610053	0	3.101	0.0267552887452779	124.04	38.8	161.2	123.45	66.35	.	.	. Found	.	.	.	.	.	.	. Found	. Found	. Found	.	.	.	.	. Found	.	. Found	.	.	.	.	.	.	.	.	.	.
	High	[K].NYAEAKDVFLGMFLYEYARR.[H]			0,00448626	0,000313424	3	P02768	Serum albumin OS=Homo sapiens OX=9606 GN=ALB PE=1 SV=2	P02768 [342-361]	2	245620673	0	0.439	0.115735971603435	19.38	112.5	87.5	93.75		. Found	. Found	. Found	. Found	. Found	. Found	.	.	.	. Found	. Found	. Found	. Found	. Found	. Found	. Found	. Found	. Found	. Found	. Found	. Found	. Found	. Found	. Found	. Found	. Found	. Found	. Found	. Found
	High	[K].QEPERNECFLQHK.[D]	1xCarbamidomethyl [C8]		0,000917181	0	156	P02768	Serum albumin OS=Homo sapiens OX=9606 GN=ALB PE=1 SV=2	P02768 [118-130]	1	171479658	0	0.802	0.745559913349073	88.92	111.8	88.2	124.77	107.02	.	.	.	.	.	.	.	.	.	.	.	.	.	.	.	.	.	.	.	.	.	.	.	.	.	.	.	.	.
	High	[K].QEPERNECFLQHKDDNPNLPR.[L]	1xCarbamidomethyl [C8]		3,71082E-06	0	232	P02768	Serum albumin OS=Homo sapiens OX=9606 GN=ALB PE=1 SV=2	P02768 [118-138]	2	263622702	0	0.953	0.964369058686853	123.25	94.7	105.3	143.45	113.22	.	.	.	.	.	.	.	.	.	.	. Found	.	.	.	.	.	.	. Found	.	.	.	.	.	.	.	.	.	.	.
	High	[K].QNCELFEQLGEYK.[F]	1xCarbamidomethyl [C3]; 1xHNE [K13]	P02768 1xHNE [K426]	0,0015821	0	1	P02768	Serum albumin OS=Homo sapiens OX=9606 GN=ALB PE=1 SV=2	P02768 [414-426]	0	181386768	0								. Found	. Found	. Found	. Found	. Found	. Found	.	. Found	. Found	. Found	. Found	. Found	. Found	. Found	. Found	. Found	. Found	. Found	. Found	. Found	. Found	. Found	. Found	. Found	. Found	. Found	. Found	. Found	. Found
	High	[K].QNCELFEQLGEYK.[F]	1xCarbamidomethyl [C3]		0,000540196	0	362	P02768	Serum albumin OS=Homo sapiens OX=9606 GN=ALB PE=1 SV=2	P02768 [414-426]	0	165775265	0	0.974	0.971416933833259	129.56	87.2	112.8	118.48	105.87	.	.	.	.	.	.	.	.	.	.	.	.	.	.	.	.	.	.	.	.	.	.	.	.	.	.	.	.	.
	High	[K].QNCELFEQLGEYKFQNALLVR.[Y]	1xCarbamidomethyl [C3]; 1xCarbamyl [K13]	P02768 1xCarbamyl [K426]	0,191295	0,00643402	1	P02768	Serum albumin OS=Homo sapiens OX=9606 GN=ALB PE=1 SV=2	P02768 [414-434]	1	264230315	0	100.000	1.18764845605701E-16			200.0		62.26	. Found	. Found	. Found	. Found	. Found	. Found	. Found	. Found	. Found	. Found	. Found	. Found	. Found	. Found	. Found	. Found	. Found	. Found	. Found	. Found	. Found	. Found	. Found	. Found	. Found	. Found	. Found	. Found	. Found
	High	[K].QNCELFEQLGEYKFQNALLVR.[Y]	1xCarbamidomethyl [C3]		5,39324E-06	0	173	P02768	Serum albumin OS=Homo sapiens OX=9606 GN=ALB PE=1 SV=2	P02768 [414-434]	1	259929733	0	1.038	0.995459652161687	143.93	66.2	133.8	197.04	127.77	.	.	.	.	.	.	.	.	.	.	. Found	.	.	.	.	. Found	.	.	.	.	.	.	.	.	.	.	.	.	.
	High	[K].QTALVELVK.[H]			0,0146327	0,000750615	178	P02768	Serum albumin OS=Homo sapiens OX=9606 GN=ALB PE=1 SV=2	P02768 [550-558]	0	100060372	0	0.850	0.841871347442062	99.23	86.2	113.8	115.23	102.94	.	.	.	.	.	.	.	.	.	.	.	.	.	.	.	.	.	.	.	.	.	.	.	.	.	.	.	.	.
	High	[K].RMPCAEDYLSVVLNQLCVLHEK.[T]	2xCarbamidomethyl [C4; C17]; 1xOxidation [M2]		2,42738E-07	0	578	P02768	Serum albumin OS=Homo sapiens OX=9606 GN=ALB PE=1 SV=2	P02768 [469-490]	1	269030989	0	0.909	0.930980694103987	116.56	92.7	107.3	136.86	136.10	.	.	.	.	.	.	.	.	.	.	.	.	.	.	.	.	.	.	.	.	.	.	.	.	.	.	.	.	.
	High	[K].RMPCAEDYLSVVLNQLCVLHEK.[T]	2xCarbamidomethyl [C4; C17]		1,96234E-07	0	596	P02768	Serum albumin OS=Homo sapiens OX=9606 GN=ALB PE=1 SV=2	P02768 [469-490]	1	267431497	0	0.929	0.9500492592737	120.06	95.3	104.7	189.24	113.93	.	.	.	.	.	.	.	.	.	.	.	.	.	.	.	.	.	.	.	.	.	.	.	.	.	.	.	.	.
	High	[K].RMPCAEDYLSVVLNQLCVLHEKTPVSDR.[V]	2xCarbamidomethyl [C4; C17]; 1xOxidation [M2]		1,40084E-06	0	63	P02768	Serum albumin OS=Homo sapiens OX=9606 GN=ALB PE=1 SV=2	P02768 [469-496]	2	334563883	0	1.953	0.760551882846898	144.44	64.9	135.1	226.34	146.09	. Found	. Found	.	.	.	.	.	.	.	. Found	. Found	. Found	. Found	. Found	. Found	. Found	. Found	. Found	. Found	. Found	. Found	.	. Found	.	. Found	. Found	. Found	.	.
	High	[K].RMPCAEDYLSVVLNQLCVLHEKTPVSDR.[V]	2xCarbamidomethyl [C4; C17]		1,81512E-08	0	90	P02768	Serum albumin OS=Homo sapiens OX=9606 GN=ALB PE=1 SV=2	P02768 [469-496]	2	332964391	0	2.305	0.138534678342475	145.43	61.0	139.0	209.40	112.77	.	.	.	.	.	.	.	.	.	. Found	. Found	. Found	. Found	. Found	. Found	. Found	.	. Found	. Found	.	.	.	.	.	.	.	.	.	.
	High	[K].SEVAHR.[F]			0,155154	0,00537401	49	P02768	Serum albumin OS=Homo sapiens OX=9606 GN=ALB PE=1 SV=2	P02768 [29-34]	0	69835801	0	1.090	0.975038780283934	138.05	107.5	92.5	115.73	114.73	. Found	. Found	. Found	. Found	.	. Found	.	. Found	.	.	.	. Found	.	. Found	. Found	.	.	.	.	.	.	.	.	.	.	.	.	.	.
	High	[K].SHCIAEVENDEMPADLPSLAADFVESK.[D]	1xCarbamidomethyl [C3]		1,21816E-07	0	521	P02768	Serum albumin OS=Homo sapiens OX=9606 GN=ALB PE=1 SV=2	P02768 [311-337]	0	297434448	1	0.915	0.935524349630532	115.21	100.8	99.2	139.05	109.72	.	.	.	.	.	.	.	.	.	.	.	.	.	.	.	.	.	.	.	.	.	.	.	.	.	.	.	.	.
	High	[K].SHCIAEVENDEMPADLPSLAADFVESK.[D]	1xCarbamidomethyl [C3]; 1xOxidation [M12]		1,76439E-07	0	430	P02768	Serum albumin OS=Homo sapiens OX=9606 GN=ALB PE=1 SV=2	P02768 [311-337]	0	299033939	0	0.946	0.961130509154002	126.94	98.0	102.0	129.76	116.61	.	.	.	.	.	.	.	.	.	.	.	.	.	.	.	.	.	.	.	.	.	.	.	.	.	.	.	.	.
	High	[K].SHCIAEVENDEMPADLPSLAADFVESKDVCK.[N]	2xCarbamidomethyl [C3; C30]; 1xOxidation [M12]		2,93405E-08	0	95	P02768	Serum albumin OS=Homo sapiens OX=9606 GN=ALB PE=1 SV=2	P02768 [311-341]	1	349256036	0	1.373	0.977531252382514	126.42	84.0	116.0	171.15	128.90	.	. Found	.	.	.	.	.	.	.	. Found	. Found	. Found	. Found	. Found	. Found	. Found	. Found	. Found	.	.	.	.	.	.	.	.	.	.	.
	High	[K].SHCIAEVENDEMPADLPSLAADFVESKDVCK.[N]	2xCarbamidomethyl [C3; C30]; 1xCarbamyl [K27]; 1xOxidation [M12]	P02768 1xCarbamyl [K337]	0,0477647	0,000840285	3	P02768	Serum albumin OS=Homo sapiens OX=9606 GN=ALB PE=1 SV=2	P02768 [311-341]	1	353556618	0	0.566	0.552257321310012	8.29	127.0	73.0	16.46	13.95	. Found	. Found	. Found	.	. Found	. Found	. Found	. Found	. Found	. Found	. Found	. Found	. Found	. Found	. Found	. Found	. Found	. Found	. Found	. Found	. Found	. Found	. Found	. Found	. Found	. Found	. Found	. Found	. Found
	High	[K].SHCIAEVENDEMPADLPSLAADFVESKDVCK.[N]	2xCarbamidomethyl [C3; C30]		1,13946E-09	0	111	P02768	Serum albumin OS=Homo sapiens OX=9606 GN=ALB PE=1 SV=2	P02768 [311-341]	1	347656545	0	0.923	0.945427465362685	122.81	87.2	112.8	200.17	154.73	.	.	.	.	.	.	.	.	.	.	.	. Found	. Found	.	. Found	. Found	.	.	.	.	.	.	.	.	.	.	.	.	.
	High	[K].SHCIAEVENDEMPADLPSLAADFVESKDVCKNYAEAK.[D]	2xCarbamidomethyl [C3; C30]; 1xOxidation [M12]		0,0021799	0,000313424	3	P02768	Serum albumin OS=Homo sapiens OX=9606 GN=ALB PE=1 SV=2	P02768 [311-347]	2	416887840	0	0.424	0.204762488187048	5.21	141.4	58.6			. Found	. Found	. Found	. Found	. Found	. Found	.	.	.	. Found	. Found	. Found	. Found	. Found	. Found	. Found	. Found	. Found	. Found	. Found	. Found	. Found	. Found	. Found	. Found	. Found	. Found	. Found	. Found
	High	[K].SHCIAEVENDEMPADLPSLAADFVESKDVCKNYAEAK.[D]	2xCarbamidomethyl [C3; C30]		2,75587E-07	0	17	P02768	Serum albumin OS=Homo sapiens OX=9606 GN=ALB PE=1 SV=2	P02768 [311-347]	2	415288349	0	0.742	0.492629189700705	76.46	126.2	73.8	196.14	167.71	. Found	.	.	.	.	. Found	.	.	.	. Found	. Found	. Found	. Found	. Found	. Found	. Found	. Found	. Found	. Found	. Found	. Found	. Found	. Found	. Found	. Found	. Found	. Found	. Found	. Found
	High	[K].SLHTLFGDK.[L]			0,0106723	0,000750615	236	P02768	Serum albumin OS=Homo sapiens OX=9606 GN=ALB PE=1 SV=2	P02768 [89-97]	0	101753637	0	0.914	0.935524349630532	115.53	99.2	100.8	128.96	104.95	.	.	.	.	.	.	.	.	.	.	.	.	.	.	.	.	.	.	.	.	.	.	.	.	.	.	.	.	.
	High	[K].SLHTLFGDKLCTVATLR.[E]	1xCarbamidomethyl [C11]		1e-05	0	657	P02768	Serum albumin OS=Homo sapiens OX=9606 GN=ALB PE=1 SV=2	P02768 [89-105]	1	193203714	0	0.989	0.977134742088879	135.39	91.2	108.8	120.08	105.92	.	.	.	.	.	.	.	.	.	.	.	.	.	.	.	.	.	.	.	.	.	.	.	.	.	.	.	.	.
	High	[K].SLHTLFGDKLCTVATLR.[E]	1xCarbamidomethyl [C11]; 1xCarbamyl [K9]	P02768 1xCarbamyl [K97]	0,000920351	0	15	P02768	Serum albumin OS=Homo sapiens OX=9606 GN=ALB PE=1 SV=2	P02768 [89-105]	1	197504296	0	1.014	0.97619640388844	67.44	139.8	60.2	58.80	70.30	. Found	. Found	. Found	.	.	. Found	.	. Found	.	. Found	. Found	. Found	. Found	. Found	. Found	. Found	. Found	. Found	. Found	.	. Found	. Found	. Found	. Found	.	.	. Found	.	.
	High	[K].SLHTLFGDKLCTVATLRETYGEMADCCAK.[Q]	3xCarbamidomethyl [C11; C26; C27]; 1xOxidation [M23]		0,000621798	0	24	P02768	Serum albumin OS=Homo sapiens OX=9606 GN=ALB PE=1 SV=2	P02768 [89-117]	2	336354763	0	0.839	0.92520524963809	67.08	95.6	104.4	158.51	171.98	. Found	. Found	. Found	. Found	. Found	.	.	.	.	. Found	. Found	. Found	. Found	. Found	. Found	. Found	. Found	. Found	. Found	. Found	. Found	. Found	. Found	. Found	. Found	.	. Found	. Found	. Found
	High	[K].SLHTLFGDKLCTVATLRETYGEMADCCAK.[Q]	3xCarbamidomethyl [C11; C26; C27]		1,54735E-06	0	139	P02768	Serum albumin OS=Homo sapiens OX=9606 GN=ALB PE=1 SV=2	P02768 [89-117]	2	334755271	0	2.550	0.0302031430408147	147.30	45.8	154.2	218.56	169.26	.	.	.	.	.	.	.	.	.	. Found	. Found	. Found	. Found	. Found	. Found	. Found	. Found	. Found	. Found	.	.	.	.	.	.	.	.	.	.
	High	[K].TCVADESAENCDK.[S]	2xCarbamidomethyl [C2; C11]		0,000380714	0	306	P02768	Serum albumin OS=Homo sapiens OX=9606 GN=ALB PE=1 SV=2	P02768 [76-88]	0	149857845	0	0.816	0.776895192338707	95.51	119.1	80.9	121.97	143.32	.	.	.	.	.	.	.	.	.	.	.	. Found	.	.	.	.	.	.	.	.	.	.	.	.	.	.	.	.	.
	High	[K].TCVADESAENCDKSLHTLFGDK.[L]	2xCarbamidomethyl [C2; C11]		9,08423E-06	0	95	P02768	Serum albumin OS=Homo sapiens OX=9606 GN=ALB PE=1 SV=2	P02768 [76-97]	1	249709698	0	1.787	0.326832530196442	141.22	73.5	126.5	187.88	119.98	.	.	.	.	.	.	.	.	.	. Found	. Found	.	. Found	. Found	.	.	.	.	.	.	.	.	.	.	.	.	.	.	.
	High	[K].TCVADESAENCDKSLHTLFGDKLCTVATLR.[E]	3xCarbamidomethyl [C2; C11; C24]		2,03965E-08	0	127	P02768	Serum albumin OS=Homo sapiens OX=9606 GN=ALB PE=1 SV=2	P02768 [76-105]	2	341159775	0	1.555	0.615816681757516	142.62	61.0	139.0	202.95	148.02	.	.	.	.	.	.	.	.	.	. Found	. Found	. Found	.	.	.	. Found	.	.	.	.	.	.	.	.	.	.	.	.	.
	High	[K].TPVSDRVTK.[C]			0,0216795	0,000840285	19	P02768	Serum albumin OS=Homo sapiens OX=9606 GN=ALB PE=1 SV=2	P02768 [491-499]	1	100255783	0	1.486	0.705175807556658	138.89	140.8	59.2	106.39	157.19	.	.	. Found	.	. Found	. Found	.	.	.	. Found	. Found	. Found	. Found	. Found	. Found	. Found	. Found	. Found	. Found	. Found	. Found	. Found	. Found	. Found	. Found	. Found	. Found	. Found	. Found
	High	[K].TYETTLEK.[C]			0,0309113	0,000840285	150	P02768	Serum albumin OS=Homo sapiens OX=9606 GN=ALB PE=1 SV=2	P02768 [376-383]	0	98448842	0	0.738	0.57195614347258	74.72	100.7	99.3	106.80	101.68	.	.	.	.	.	.	.	.	.	.	.	.	.	.	.	.	.	.	.	.	.	.	.	.	.	.	.	.	.
	High	[K].TYETTLEKCCAAADPHECYAK.[V]	3xCarbamidomethyl [C9; C10; C18]		0,000219909	0	1	P02768	Serum albumin OS=Homo sapiens OX=9606 GN=ALB PE=1 SV=2	P02768 [376-396]	1	251806832	0								. Found	. Found	. Found	. Found	. Found	. Found	. Found	. Found	. Found	. Found	. Found	. Found	. Found	. Found	. Found	. Found	. Found	. Found	.	. Found	. Found	. Found	. Found	. Found	. Found	. Found	. Found	. Found	. Found
	High	[K].VFDEFKPLVEEPQNLIK.[Q]			8,36632E-06	0	801	P02768	Serum albumin OS=Homo sapiens OX=9606 GN=ALB PE=1 SV=2	P02768 [397-413]	0	204509537	0	1.048	0.998019339144021	131.92	80.4	119.6	102.64	95.69	.	.	.	.	.	.	.	.	.	.	.	.	.	.	.	.	.	.	.	.	.	.	.	.	.	.	.	.	.
	High	[K].VFDEFKPLVEEPQNLIK.[Q]	1xHNE [K17]	P02768 1xHNE [K413]	0,00968432	0,000750615	1	P02768	Serum albumin OS=Homo sapiens OX=9606 GN=ALB PE=1 SV=2	P02768 [397-413]	0	220121040	0	0.208	0.00213635173125693	2.01	164.5	35.5		33.31	. Found	. Found	. Found	. Found	. Found	. Found	.	. Found	. Found	. Found	. Found	. Found	. Found	. Found	. Found	. Found	. Found	. Found	. Found	. Found	. Found	. Found	. Found	. Found	. Found	. Found	. Found	. Found	. Found
	High	[K].VFDEFKPLVEEPQNLIKQNCELFEQLGEYK.[F]	1xCarbamidomethyl [C20]		4,48131E-06	0	13	P02768	Serum albumin OS=Homo sapiens OX=9606 GN=ALB PE=1 SV=2	P02768 [397-426]	1	368383018	0	0.120	3.15700065478032E-09	1.39	107.1	92.9	136.63	60.42	. Found	. Found	. Found	. Found	.	. Found	.	.	.	. Found	. Found	. Found	. Found	. Found	. Found	. Found	. Found	. Found	. Found	. Found	. Found	. Found	. Found	. Found	. Found	. Found	. Found	. Found	.
	High	[K].VFDEFKPLVEEPQNLIKQNCELFEQLGEYKFQNALLVR.[Y]	1xCarbamidomethyl [C20]		0,00403341	0,000313424	3	P02768	Serum albumin OS=Homo sapiens OX=9606 GN=ALB PE=1 SV=2	P02768 [397-434]	2	462537486	0	0.010	1.18764845605701E-16		200.0				. Found	. Found	. Found	. Found	. Found	. Found	.	.	.	. Found	. Found	. Found	. Found	. Found	. Found	. Found	. Found	. Found	. Found	. Found	. Found	. Found	. Found	. Found	. Found	. Found	. Found	. Found	. Found
	High	[K].VHTECCHGDLLECADDR.[A]	3xCarbamidomethyl [C5; C6; C13]		6,70034E-07	0	128	P02768	Serum albumin OS=Homo sapiens OX=9606 GN=ALB PE=1 SV=2	P02768 [265-281]	0	208683753	0	0.732	0.554087229330521	75.43	114.2	85.8	143.73	117.15	.	.	.	.	.	.	.	.	.	. Found	. Found	. Found	. Found	.	.	.	.	. Found	.	.	.	.	.	.	.	.	.	.	.
	High	[K].VHTECCHGDLLECADDRADLAK.[Y]	3xCarbamidomethyl [C5; C6; C13]		8,53427E-09	0	415	P02768	Serum albumin OS=Homo sapiens OX=9606 GN=ALB PE=1 SV=2	P02768 [265-286]	1	258511773	0	0.835	0.814568714331598	100.87	93.0	107.0	157.80	114.00	.	.	.	.	.	.	.	.	.	. Found	. Found	. Found	.	.	.	.	.	.	.	.	.	.	.	.	.	.	.	.	.
	High	[K].VPQVSTPTLVEVSR.[N]			0,000125293	0	145	P02768	Serum albumin OS=Homo sapiens OX=9606 GN=ALB PE=1 SV=2	P02768 [439-452]	0	151184278	0	0.949	0.963092814450614	123.19	101.7	98.3	137.53	116.26	.	.	.	.	.	.	.	.	.	.	.	.	.	.	.	.	.	.	.	.	.	.	.	.	.	.	.	.	.
	High	[K].YICENQDSISSK.[L]	1xCarbamidomethyl [C3]		0,00134735	0	199	P02768	Serum albumin OS=Homo sapiens OX=9606 GN=ALB PE=1 SV=2	P02768 [287-298]	0	144364203	0	0.761	0.642722377726003	76.28	99.1	100.9	122.04	126.97	.	.	.	.	.	.	.	.	.	.	.	.	.	.	.	.	.	.	.	.	.	.	.	.	.	.	.	.	.
	High	[K].YICENQDSISSKLK.[E]	1xCarbamidomethyl [C3]		0,000416228	0	27	P02768	Serum albumin OS=Homo sapiens OX=9606 GN=ALB PE=1 SV=2	P02768 [287-300]	1	168482106	0	0.877	0.940196614154894	93.39	103.4	96.6	142.46	139.07	. Found	.	. Found	.	.	.	.	.	.	. Found	. Found	. Found	. Found	. Found	. Found	. Found	. Found	. Found	.	.	.	. Found	. Found	. Found	.	.	. Found	.	.
	High	[K].YICENQDSISSKLKECCEKPLLEK.[S]	3xCarbamidomethyl [C3; C16; C17]		0,0777869	0,00176323	4	P02768	Serum albumin OS=Homo sapiens OX=9606 GN=ALB PE=1 SV=2	P02768 [287-310]	2	297142096	0	0.425	0.231854209677947	2.04	140.4	59.6			. Found	. Found	. Found	. Found	. Found	. Found	.	.	. Found	. Found	. Found	. Found	. Found	. Found	. Found	. Found	. Found	. Found	. Found	. Found	. Found	. Found	. Found	. Found	. Found	. Found	. Found	. Found	. Found
	High	[K].YLYEIAR.[R]			0,0666701	0,00158954	331	P02768	Serum albumin OS=Homo sapiens OX=9606 GN=ALB PE=1 SV=2	P02768 [162-168]	0	92749344	0	0.983	0.97619640388844	131.54	96.2	103.8	122.21	103.37	.	.	.	.	.	.	.	.	.	.	.	.	.	.	.	.	.	.	.	.	.	.	.	.	.	.	.	.	.
	High	[K].YLYEIARR.[H]			0,0250589	0,000840285	32	P02768	Serum albumin OS=Homo sapiens OX=9606 GN=ALB PE=1 SV=2	P02768 [162-169]	1	108359455	0	0.979	0.894248690467875	138.99	129.4	70.6	200.31	178.62	.	.	.	.	. Found	.	.	.	.	. Found	. Found	. Found	. Found	. Found	. Found	. Found	. Found	. Found	.	. Found	. Found	. Found	. Found	. Found	. Found	.	.	. Found	. Found
	High	[R].AFKAWAVAR.[L]			0,0147501	0,000750615	34	P02768	Serum albumin OS=Homo sapiens OX=9606 GN=ALB PE=1 SV=2	P02768 [234-242]	1	101957851	0	1.585	0.892905323889356	100.40	68.5	131.5	167.37	149.90	. Found	.	. Found	.	.	.	.	.	.	. Found	. Found	. Found	. Found	. Found	. Found	. Found	. Found	. Found	. Found	.	.	. Found	.	.	.	.	.	.	.
	High	[R].DAHKSEVAHR.[F]			0,000661438	0	105	P02768	Serum albumin OS=Homo sapiens OX=9606 GN=ALB PE=1 SV=2	P02768 [25-34]	1	114957594	0	1.352	0.867819541480783	141.47	113.8	86.2	111.77	116.16	.	.	.	.	.	.	.	.	.	. Found	. Found	.	.	. Found	. Found	.	.	. Found	.	.	.	.	.	.	.	.	.	.	.
	High	[R].ETYGEMADCCAK.[Q]	2xCarbamidomethyl [C9; C10]		0,00373581	0,000313424	179	P02768	Serum albumin OS=Homo sapiens OX=9606 GN=ALB PE=1 SV=2	P02768 [106-117]	0	143453341	0	0.775	0.674713289414514	83.06	107.6	92.4	127.21	111.83	.	.	.	.	.	.	.	.	.	.	.	.	.	.	.	.	.	.	.	.	.	.	.	.	.	.	.	.	.
	High	[R].ETYGEMADCCAK.[Q]	2xCarbamidomethyl [C9; C10]; 1xOxidation [M6]		0,00817553	0,000750615	249	P02768	Serum albumin OS=Homo sapiens OX=9606 GN=ALB PE=1 SV=2	P02768 [106-117]	0	145052833	0	0.779	0.681609376331643	87.64	115.7	84.3	112.57	116.47	.	.	.	.	.	.	.	.	.	. Found	. Found	.	.	.	.	.	.	.	.	.	.	.	.	.	.	.	.	.	.
	High	[R].ETYGEMADCCAKQEPER.[N]	2xCarbamidomethyl [C9; C10]		0,000959267	0	3	P02768	Serum albumin OS=Homo sapiens OX=9606 GN=ALB PE=1 SV=2	P02768 [106-122]	1	207383105	0	0.312	0.0459623953840172	6.69	138.6	61.4	85.44	54.77	. Found	. Found	. Found	. Found	. Found	. Found	. Found	.	.	. Found	. Found	. Found	. Found	. Found	. Found	. Found	. Found	. Found	. Found	. Found	. Found	. Found	. Found	. Found	. Found	. Found	.	. Found	. Found
	High	[R].ETYGEMADCCAKQEPERNECFLQHK.[D]	3xCarbamidomethyl [C9; C10; C20]		0,00704751	0,000591694	5	P02768	Serum albumin OS=Homo sapiens OX=9606 GN=ALB PE=1 SV=2	P02768 [106-130]	2	313031215	0	0.884	0.953537638200151	102.64	74.7	125.3	165.16	98.08	. Found	. Found	. Found	. Found	. Found	. Found	.	.	.	. Found	. Found	. Found	. Found	. Found	. Found	. Found	. Found	. Found	. Found	. Found	. Found	. Found	. Found	. Found	. Found	. Found	. Found	. Found	. Found
	High	[R].FKDLGEENFK.[A]			0,00353749	0,000313424	124	P02768	Serum albumin OS=Homo sapiens OX=9606 GN=ALB PE=1 SV=2	P02768 [35-44]	1	122660518	0	1.070	0.999209963067217	131.08	78.9	121.1	124.78	111.79	.	.	.	.	.	.	.	.	.	. Found	.	. Found	.	.	.	.	.	.	.	.	.	.	.	.	.	.	.	.	.
	High	[R].FKDLGEENFKALVLIAFAQYLQQCPFEDHVK.[L]	1xCarbamidomethyl [C24]		1,05834E-07	0	271	P02768	Serum albumin OS=Homo sapiens OX=9606 GN=ALB PE=1 SV=2	P02768 [35-65]	2	369787232	0	1.685	0.810929759445222	144.95	59.1	140.9	220.93	205.54	.	.	.	.	.	.	.	.	.	.	. Found	.	.	.	.	.	.	.	. Found	. Found	. Found	.	. Found	.	.	.	.	.	.
	High	[R].FPKAEFAEVSK.[L]			0,00445336	0,000313424	5	P02768	Serum albumin OS=Homo sapiens OX=9606 GN=ALB PE=1 SV=2	P02768 [247-257]	1	125265721	0	0.876	0.977134742088879	101.55	102.6	97.4	104.04	94.40	. Found	. Found	. Found	. Found	. Found	. Found	.	.	.	. Found	. Found	. Found	. Found	. Found	. Found	. Found	. Found	. Found	. Found	. Found	. Found	. Found	. Found	. Found	. Found	. Found	. Found	. Found	. Found
	High	[R].HPDYSVVLLLR.[L]			0,00118064	0	157	P02768	Serum albumin OS=Homo sapiens OX=9606 GN=ALB PE=1 SV=2	P02768 [362-372]	0	131174195	0	0.799	0.738721572742275	86.86	104.5	95.5	119.32	112.40	.	.	.	.	.	.	.	.	.	. Found	. Found	. Found	. Found	. Found	. Found	.	.	.	.	.	.	.	.	.	.	.	.	.	.
	High	[R].HPDYSVVLLLR.[L]	1xHNE [H1]	P02768 1xHNE [H362]	0,0204684	0,000840285	5	P02768	Serum albumin OS=Homo sapiens OX=9606 GN=ALB PE=1 SV=2	P02768 [362-372]	0	146785698	0								. Found	. Found	. Found	. Found	.	. Found	. Found	. Found	. Found	. Found	. Found	. Found	. Found	. Found	. Found	. Found	. Found	.	. Found	. Found	. Found	. Found	. Found	. Found	. Found	.	.	. Found	. Found
	High	[R].HPYFYAPELLFFAK.[R]	1xHNE [H1]	P02768 1xHNE [H170]	0,000193697	0	259	P02768	Serum albumin OS=Homo sapiens OX=9606 GN=ALB PE=1 SV=2	P02768 [170-183]	0	189900912	0	0.859	0.974433709628972	98.38	90.2	109.8	37.52	129.67	.	.	.	.	.	.	.	.	.	. Found	. Found	. Found	.	. Found	.	.	.	.	.	.	.	.	.	.	.	.	.	.	.
	High	[R].HPYFYAPELLFFAK.[R]			3,6444E-05	0	440	P02768	Serum albumin OS=Homo sapiens OX=9606 GN=ALB PE=1 SV=2	P02768 [170-183]	0	174289409	0	1.004	0.983306306909598	137.36	91.5	108.5	155.66	103.23	.	.	.	.	.	.	.	.	.	.	.	.	.	.	.	.	.	.	.	.	.	.	.	.	.	.	.	.	.
	High	[R].HPYFYAPELLFFAKR.[Y]	1xCarbamyl [K14]	P02768 1xCarbamyl [K183]	0,242294	0,00929554	2	P02768	Serum albumin OS=Homo sapiens OX=9606 GN=ALB PE=1 SV=2	P02768 [170-184]	1	194200102	0	0.822	0.961719104792668	47.88	113.4	86.6	33.66	58.89	. Found	. Found	. Found	. Found	. Found	. Found	. Found	. Found	. Found	. Found	. Found	. Found	. Found	. Found	. Found	. Found	. Found	. Found	. Found	. Found	. Found	. Found	. Found	. Found	. Found	. Found	. Found	. Found	. Found
	High	[R].HPYFYAPELLFFAKR.[Y]	1xHNE [H1]	P02768 1xHNE [H170]	1,90576E-05	0	6	P02768	Serum albumin OS=Homo sapiens OX=9606 GN=ALB PE=1 SV=2	P02768 [170-184]	1	205511023	0								. Found	. Found	. Found	.	. Found	. Found	. Found	. Found	.	. Found	. Found	. Found	. Found	. Found	. Found	. Found	. Found	. Found	. Found	. Found	. Found	. Found	.	. Found	. Found	. Found	. Found	. Found	. Found
	High	[R].LAKTYETTLEK.[C]			0,00377686	0,000313424	8	P02768	Serum albumin OS=Homo sapiens OX=9606 GN=ALB PE=1 SV=2	P02768 [373-383]	1	129670456	0	1.673	0.870661843711429	101.05	94.6	105.4	79.46	100.20	. Found	. Found	. Found	. Found	. Found	. Found	.	.	.	. Found	. Found	. Found	. Found	. Found	. Found	. Found	. Found	. Found	. Found	. Found	.	. Found	. Found	. Found	. Found	. Found	. Found	. Found	. Found
	High	[R].LAKTYETTLEK.[C]	1xCarbamyl [K3]	P02768 1xCarbamyl [K375]	0,0100282	0,000750615	14	P02768	Serum albumin OS=Homo sapiens OX=9606 GN=ALB PE=1 SV=2	P02768 [373-383]	1	133971037	0	1.092	0.999209963067217	57.67	104.4	95.6	40.63	55.28	. Found	. Found	. Found	. Found	. Found	.	.	.	.	. Found	. Found	. Found	. Found	. Found	. Found	. Found	. Found	. Found	. Found	.	.	. Found	. Found	. Found	. Found	.	.	. Found	. Found
	High	[R].LKCASLQK.[F]	1xCarbamidomethyl [C3]; 1xCarbamyl [K2]	P02768 1xCarbamyl [K223]	0,0700664	0,00158954	17	P02768	Serum albumin OS=Homo sapiens OX=9606 GN=ALB PE=1 SV=2	P02768 [222-229]	1	99054008	0	0.705	0.40601660598306	56.69	94.4	105.6	86.66	91.48	. Found	. Found	. Found	. Found	. Found	. Found	.	.	.	. Found	. Found	. Found	. Found	. Found	. Found	. Found	. Found	. Found	.	.	.	.	.	. Found	.	.	. Found	.	.
	High	[R].LKCASLQK.[F]	1xCarbamidomethyl [C3]		0,0439581	0,000840285	48	P02768	Serum albumin OS=Homo sapiens OX=9606 GN=ALB PE=1 SV=2	P02768 [222-229]	1	94753426	0	0.270	8.8864251055457E-06	10.37	184.2	15.8	103.54	197.22	. Found	.	.	.	.	.	.	.	.	. Found	. Found	. Found	. Found	. Found	. Found	. Found	. Found	. Found	. Found	.	. Found	.	.	.	. Found	. Found	.	. Found	.
	High	[R].LSQRFPK.[A]			0,173922	0,00633877	71	P02768	Serum albumin OS=Homo sapiens OX=9606 GN=ALB PE=1 SV=2	P02768 [243-249]	1	87550976	0	0.860	0.859957381458777	106.76	74.3	125.7	161.23	136.32	.	.	.	.	.	.	.	.	.	. Found	. Found	.	. Found	. Found	.	.	.	. Found	.	.	.	. Found	.	.	.	.	.	.	.
	High	[R].LVRPEVDVMCTAFHDNEETFLK.[K]	1xCarbamidomethyl [C10]; 1xHNE [K/H]	P02768 1xHNE [K/H]	0,000254859	0	44	P02768	Serum albumin OS=Homo sapiens OX=9606 GN=ALB PE=1 SV=2	P02768 [139-160]	0	280637901	0	1.311	0.968093602891856	135.92	114.0	86.0	173.18	149.89	. Found	. Found	. Found	.	.	. Found	.	.	.	. Found	. Found	. Found	. Found	. Found	. Found	. Found	. Found	. Found	. Found	.	. Found	.	. Found	. Found	.	.	.	.	.
	High	[R].LVRPEVDVMCTAFHDNEETFLK.[K]	1xCarbamidomethyl [C10]; 1xOxidation [M9]		5,37965E-07	0	211	P02768	Serum albumin OS=Homo sapiens OX=9606 GN=ALB PE=1 SV=2	P02768 [139-160]	0	266625890	0	1.212	0.988539843201046	96.02	104.5	95.5	88.40	75.94	.	.	.	.	.	.	.	.	.	. Found	. Found	. Found	. Found	. Found	. Found	. Found	. Found	. Found	.	.	.	.	.	.	.	.	.	.	.
	High	[R].LVRPEVDVMCTAFHDNEETFLK.[K]	1xCarbamidomethyl [C10]		2,36382E-08	0	227	P02768	Serum albumin OS=Homo sapiens OX=9606 GN=ALB PE=1 SV=2	P02768 [139-160]	0	265026398	0	1.075	0.999209963067217	121.21	103.4	96.6	116.10	102.19	.	.	.	.	.	.	.	.	.	.	.	.	.	.	.	.	.	.	.	.	.	.	.	.	.	.	.	.	.
	High	[R].LVRPEVDVMCTAFHDNEETFLKK.[Y]	1xCarbamidomethyl [C10]; 1xCarbamyl [K]	P02768 1xCarbamyl [K]	0,000103751	0	21	P02768	Serum albumin OS=Homo sapiens OX=9606 GN=ALB PE=1 SV=2	P02768 [139-161]	1	282136476	0	1.167	0.987093671297076	117.27	77.5	122.5	98.85	81.93	. Found	. Found	. Found	. Found	. Found	. Found	.	.	.	. Found	. Found	. Found	. Found	. Found	. Found	. Found	. Found	. Found	.	.	.	. Found	. Found	. Found	. Found	. Found	. Found	. Found	.
	High	[R].LVRPEVDVMCTAFHDNEETFLKK.[Y]	1xCarbamidomethyl [C10]		9,49179E-09	0	845	P02768	Serum albumin OS=Homo sapiens OX=9606 GN=ALB PE=1 SV=2	P02768 [139-161]	1	277835895	0	0.892	0.90907199832697	108.80	93.3	106.7	125.08	107.13	.	.	.	.	.	.	.	.	.	.	.	.	.	.	.	.	.	.	.	.	.	.	.	.	.	.	.	.	.
	High	[R].LVRPEVDVMCTAFHDNEETFLKK.[Y]	1xCarbamidomethyl [C10]; 1xHNE [H14]	P02768 1xHNE [H152]	0,0134063	0,000750615	42	P02768	Serum albumin OS=Homo sapiens OX=9606 GN=ALB PE=1 SV=2	P02768 [139-161]	1	293447398	0	2.723	0.070231563791822	133.99	72.4	127.6	201.34	91.80	.	.	.	.	. Found	.	.	.	.	. Found	. Found	. Found	. Found	. Found	. Found	. Found	. Found	. Found	. Found	. Found	.	.	.	.	. Found	.	.	.	.
	High	[R].LVRPEVDVMCTAFHDNEETFLKK.[Y]	1xCarbamidomethyl [C10]; 1xOxidation [M9]; 1xHNE [H14]	P02768 1xHNE [H152]	0,0080207	0,000750615	7	P02768	Serum albumin OS=Homo sapiens OX=9606 GN=ALB PE=1 SV=2	P02768 [139-161]	1	295046889	0	1.474	0.956084375177942	109.01	65.5	134.5	67.52	80.95	. Found	. Found	. Found	. Found	. Found	. Found	. Found	.	.	. Found	. Found	. Found	. Found	. Found	. Found	. Found	. Found	. Found	. Found	. Found	. Found	. Found	. Found	. Found	. Found	. Found	. Found	. Found	. Found
	High	[R].LVRPEVDVMCTAFHDNEETFLKK.[Y]	1xCarbamidomethyl [C10]; 1xOxidation [M9]		1,38175E-06	0	746	P02768	Serum albumin OS=Homo sapiens OX=9606 GN=ALB PE=1 SV=2	P02768 [139-161]	1	279435386	0	0.871	0.874304886327656	108.82	97.8	102.2	149.81	130.12	.	.	.	.	.	.	.	.	.	.	.	.	.	.	.	.	.	.	.	.	.	.	.	.	.	.	.	.	.
	High	[R].MPCAEDYLSVVLNQLCVLHEK.[T]	2xCarbamidomethyl [C3; C16]		1,12677E-08	0	226	P02768	Serum albumin OS=Homo sapiens OX=9606 GN=ALB PE=1 SV=2	P02768 [470-490]	0	251821386	0	0.951	0.964369058686853	124.47	84.5	115.5	208.09	109.29	.	.	.	.	.	.	.	.	.	.	.	. Found	.	.	. Found	.	.	.	.	.	.	.	.	.	.	.	.	.	.
	High	[R].MPCAEDYLSVVLNQLCVLHEK.[T]	2xCarbamidomethyl [C3; C16]; 1xOxidation [M1]		4,887E-07	0	189	P02768	Serum albumin OS=Homo sapiens OX=9606 GN=ALB PE=1 SV=2	P02768 [470-490]	0	253420878	0	1.536	0.642017902290515	139.79	65.8	134.2	141.47	146.32	.	.	.	.	.	.	.	.	.	. Found	. Found	. Found	.	.	.	. Found	. Found	. Found	.	.	.	.	.	.	.	.	.	.	.
	High	[R].MPCAEDYLSVVLNQLCVLHEKTPVSDR.[V]	2xCarbamidomethyl [C3; C16]; 1xOxidation [M1]		0,00126117	0	5	P02768	Serum albumin OS=Homo sapiens OX=9606 GN=ALB PE=1 SV=2	P02768 [470-496]	1	318953772	0	0.162	3.759441253939E-05	3.00	172.3	27.7	92.87	175.23	. Found	. Found	. Found	. Found	. Found	. Found	. Found	.	.	. Found	. Found	. Found	. Found	. Found	. Found	. Found	. Found	. Found	. Found	. Found	. Found	. Found	. Found	. Found	. Found	. Found	. Found	. Found	. Found
	High	[R].MPCAEDYLSVVLNQLCVLHEKTPVSDR.[V]	2xCarbamidomethyl [C3; C16]		2,30146E-05	0	31	P02768	Serum albumin OS=Homo sapiens OX=9606 GN=ALB PE=1 SV=2	P02768 [470-496]	1	317354280	0	1.281	0.996290224812264	136.64	80.1	119.9	202.74	119.28	.	. Found	.	.	.	.	. Found	.	.	. Found	. Found	. Found	. Found	. Found	. Found	. Found	. Found	. Found	. Found	.	. Found	.	. Found	.	.	.	.	.	.
	High	[R].MPCAEDYLSVVLNQLCVLHEKTPVSDRVTK.[C]	2xCarbamidomethyl [C3; C16]		7,04132E-05	0	9	P02768	Serum albumin OS=Homo sapiens OX=9606 GN=ALB PE=1 SV=2	P02768 [470-499]	2	350175386	0	0.031	1.18764845605701E-16	0.09	195.3	4.7		123.66	. Found	. Found	. Found	. Found	. Found	. Found	.	.	.	. Found	. Found	. Found	. Found	. Found	. Found	. Found	. Found	. Found	. Found	. Found	. Found	. Found	. Found	. Found	. Found	. Found	. Found	. Found	. Found
	High	[R].NECFLQHK.[D]	1xCarbamidomethyl [C3]		0,0368156	0,000840285	63	P02768	Serum albumin OS=Homo sapiens OX=9606 GN=ALB PE=1 SV=2	P02768 [123-130]	0	107549894	0	1.801	0.643799395710701	135.27	96.7	103.3	128.05	89.58	.	.	.	.	.	.	.	.	.	. Found	. Found	. Found	. Found	.	.	.	. Found	. Found	.	.	.	.	.	.	.	.	.	.	.
	High	[R].NECFLQHKDDNPNLPR.[L]	1xCarbamidomethyl [C3]		9,56387E-06	0	142	P02768	Serum albumin OS=Homo sapiens OX=9606 GN=ALB PE=1 SV=2	P02768 [123-138]	1	199692938	0	0.857	0.854539937577856	102.86	95.8	104.2	138.44	111.86	.	.	.	.	.	.	.	.	.	.	.	.	.	.	.	.	.	.	.	.	.	.	.	.	.	.	.	.	.
	High	[R].QIKKQTALVELVK.[H]			0,224765	0,00782232	1	P02768	Serum albumin OS=Homo sapiens OX=9606 GN=ALB PE=1 SV=2	P02768 [546-558]	2	149793629	0								. Found	. Found	. Found	. Found	. Found	. Found	. Found	. Found	.	. Found	. Found	. Found	. Found	. Found	. Found	. Found	. Found	. Found	. Found	. Found	. Found	. Found	. Found	. Found	. Found	. Found	. Found	. Found	. Found
	High	[R].RHPDYSVVLLLR.[L]			9,45737E-05	0	1474	P02768	Serum albumin OS=Homo sapiens OX=9606 GN=ALB PE=1 SV=2	P02768 [361-372]	1	146784306	1	1.129	0.994806865988899	137.70	84.8	115.2	137.44	104.67	.	.	.	.	.	.	.	.	.	.	.	.	.	.	.	.	.	.	.	.	.	.	.	.	.	.	.	.	.
	High	[R].RHPYFYAPELLFFAK.[R]			8,96043E-06	0	2754	P02768	Serum albumin OS=Homo sapiens OX=9606 GN=ALB PE=1 SV=2	P02768 [169-183]	1	189899520	57	1.128	0.994806865988899	139.53	78.5	121.5	167.55	106.73	.	.	.	.	.	.	.	.	.	.	.	.	.	.	.	.	.	.	.	.	.	.	.	.	.	.	.	.	.
	High	[R].RHPYFYAPELLFFAK.[R]	1xHNE [K/H]	P02768 1xHNE [H/K]	0,0107559	0,000750615	5	P02768	Serum albumin OS=Homo sapiens OX=9606 GN=ALB PE=1 SV=2	P02768 [169-183]	1	205511023	0								. Found	. Found	. Found	. Found	. Found	. Found	. Found	. Found	.	. Found	. Found	. Found	. Found	. Found	. Found	. Found	. Found	. Found	. Found	. Found	. Found	. Found	. Found	. Found	. Found	. Found	. Found	.	. Found
	High	[R].RHPYFYAPELLFFAKR.[Y]			4,47002E-07	0	64	P02768	Serum albumin OS=Homo sapiens OX=9606 GN=ALB PE=1 SV=2	P02768 [169-184]	2	205509631	7	0.973	0.909863605903733	135.02	61.7	138.3	191.54	104.31	.	.	.	.	.	.	.	.	.	. Found	. Found	. Found	. Found	. Found	. Found	. Found	. Found	. Found	. Found	. Found	. Found	. Found	.	. Found	. Found	.	. Found	.	.
	High	[R].RPCFSALEVDETYVPK.[E]	1xCarbamidomethyl [C3]		8,44519E-05	0	387	P02768	Serum albumin OS=Homo sapiens OX=9606 GN=ALB PE=1 SV=2	P02768 [509-524]	0	191093167	0	0.885	0.900421921311254	107.26	92.4	107.6	134.07	103.31	.	.	.	.	.	.	.	.	.	.	.	.	.	.	.	.	.	.	.	.	.	.	.	.	.	.	.	.	.
	High	[R].RPCFSALEVDETYVPKEFNAETFTFHADICTLSEK.[E]	2xCarbamidomethyl [C3; C30]		2,68858E-10	0	103	P02768	Serum albumin OS=Homo sapiens OX=9606 GN=ALB PE=1 SV=2	P02768 [509-543]	1	415193651	0	3.789	8.81154794471432E-05	138.62	31.9	168.1	228.85	80.01	. Found	.	.	.	.	.	.	.	.	.	. Found	.	.	.	.	.	.	. Found	.	.	. Found	.	.	.	.	.	.	.	.
	High	[R].RPCFSALEVDETYVPKEFNAETFTFHADICTLSEKER.[Q]	2xCarbamidomethyl [C3; C30]		2,12194E-10	0	87	P02768	Serum albumin OS=Homo sapiens OX=9606 GN=ALB PE=1 SV=2	P02768 [509-545]	2	443708021	0	7.519	6.7715804340369E-11	128.01	15.2	184.8	216.83	38.03	.	.	.	.	.	. Found	.	.	.	. Found	. Found	. Found	. Found	. Found	. Found	.	.	. Found	.	.	.	.	.	. Found	.	.	.	.	.
	High	[R].VTKCCTESLVNR.[R]	2xCarbamidomethyl [C4; C5]		0,0646018	0,00141145	2	P02768	Serum albumin OS=Homo sapiens OX=9606 GN=ALB PE=1 SV=2	P02768 [497-508]	1	146670901	0								. Found	. Found	. Found	. Found	. Found	. Found	. Found	.	. Found	. Found	. Found	. Found	. Found	. Found	. Found	. Found	. Found	. Found	. Found	. Found	. Found	. Found	. Found	. Found	. Found	.	. Found	. Found	. Found
	High	[R].YKAAFTECCQAADK.[A]	2xCarbamidomethyl [C8; C9]		4,26731E-05	0	78	P02768	Serum albumin OS=Homo sapiens OX=9606 GN=ALB PE=1 SV=2	P02768 [185-198]	1	166272505	0	0.942	0.957248470194355	122.81	101.0	99.0	156.76	109.76	.	.	.	.	.	.	.	.	.	. Found	. Found	. Found	. Found	. Found	. Found	.	. Found	.	.	.	.	.	.	.	.	.	.	.	.
	High	[R].YKAAFTECCQAADKAACLLPK.[L]	3xCarbamidomethyl [C8; C9; C17]		1,44972E-06	0	16	P02768	Serum albumin OS=Homo sapiens OX=9606 GN=ALB PE=1 SV=2	P02768 [185-205]	2	241614578	0	0.544	0.230072254858845	38.68	137.6	62.4	134.78	156.55	. Found	. Found	. Found	. Found	.	.	.	.	.	. Found	. Found	. Found	. Found	. Found	. Found	. Found	. Found	. Found	. Found	. Found	. Found	. Found	. Found	. Found	. Found	. Found	. Found	. Found	. Found
High	Master Protein	P02647	Apolipoprotein A-I OS=Homo sapiens OX=9606 GN=APOA1 PE=1 SV=1	100	66	58286	66	267	30,8	5,76	1.025	0.04	0.808162	.	.	.	.	.	.	.	.	.	.	.	.	.	.	.	.	.	.	.	.	.	.	.	.	.	.	.	.	.	.	.	.	.	.	.	.
	Confidence	Annotated Sequence	Modifications	Modifications in Master Proteins	Qvality PEP	Qvality q-value	# PSMs	Master Protein Accessions	Master Protein Descriptions	Positions in Master Proteins	# Missed Cleavages	Theo. MH+ [Da]	# Razor Quan Results	Abundance Ratio: (HDL) / (Control)	Abundance Ratio Adj. P-Value: (HDL) / (Control)	Abundance Ratio Variability [%]: (HDL) / (Control)	Abundances (Grouped): Control	Abundances (Grouped): HDL	Abundances (Grouped) CV [%]: Control	Abundances (Grouped) CV [%]: HDL	Found in Sample: [S2] F2: Sample, C7, Control, Replicate 1	Found in Sample: [S3] F3: Sample, C7, Control, Replicate 2	Found in Sample: [S4] F4: Sample, C7, Control, Replicate 3	Found in Sample: [S5] F5: Sample, C9, Control, Replicate 1	Found in Sample: [S6] F6: Sample, C9, Control, Replicate 2	Found in Sample: [S7] F7: Sample, C9, Control, Replicate 3	Found in Sample: [S8] F8: Sample, C10, Control, Replicate 1	Found in Sample: [S9] F9: Sample, C10, Control, Replicate 2	Found in Sample: [S10] F10: Sample, C10, Control, Replicate 3	Found in Sample: [S20] F20: Sample, C5, Control, Replicate 1	Found in Sample: [S21] F21: Sample, C5, Control, Replicate 2	Found in Sample: [S22] F22: Sample, C5, Control, Replicate 3	Found in Sample: [S23] F23: Sample, C6, Control, Replicate 1	Found in Sample: [S24] F24: Sample, C6, Control, Replicate 2	Found in Sample: [S25] F25: Sample, C6, Control, Replicate 3	Found in Sample: [S26] F26: Sample, C8, Control, Replicate 1	Found in Sample: [S27] F27: Sample, C8, Control, Replicate 2	Found in Sample: [S28] F28: Sample, C8, Control, Replicate 3	Found in Sample: [S38] F38: Sample, C1, Control, Replicate 1	Found in Sample: [S39] F39: Sample, C1, Control, Replicate 2	Found in Sample: [S40] F40: Sample, C1, Control, Replicate 3	Found in Sample: [S41] F41: Sample, C4, Control, Replicate 1	Found in Sample: [S42] F42: Sample, C4, Control, Replicate 2	Found in Sample: [S43] F43: Sample, C4, Control, Replicate 3	Found in Sample: [S11] F11: Sample, H1, HDL, Replicate 1	Found in Sample: [S12] F12: Sample, H1, HDL, Replicate 2	Found in Sample: [S13] F13: Sample, H1, HDL, Replicate 3	Found in Sample: [S14] F14: Sample, H2, HDL, Replicate 1	Found in Sample: [S15] F15: Sample, H2, HDL, Replicate 2
	High	[-].MKAAVLTLAVLFLTGSQAR.[H]	1xOxidation [M1]		0,000219909	0	3	P02647	Apolipoprotein A-I OS=Homo sapiens OX=9606 GN=APOA1 PE=1 SV=1	P02647 [1-19]	1	200614669	0	1.144	0.984270214801848	46.67	93.5	106.5	66.83	29.15	. Found	. Found	. Found	. Found	. Found	. Found	. Found	. Found	. Found	. Found	. Found	. Found	.	.	.	. Found	. Found	. Found	. Found	. Found	. Found	. Found	. Found	. Found	. Found	. Found	. Found	. Found	. Found
	High	[-].MKAAVLTLAVLFLTGSQAR.[H]			0,0140609	0,000750615	9	P02647	Apolipoprotein A-I OS=Homo sapiens OX=9606 GN=APOA1 PE=1 SV=1	P02647 [1-19]	1	199015178	0	0.154	0.00112910891198485	0.97	170.8	29.2	34.51		. Found	. Found	. Found	.	.	.	.	.	. Found	.	.	. Found	. Found	. Found	. Found	. Found	.	. Found	. Found	. Found	. Found	. Found	. Found	. Found	. Found	. Found	. Found	. Found	. Found
	High	[K].AAVLTLAVLFLTGSQAR.[H]			0,105833	0,00354981	3	P02647	Apolipoprotein A-I OS=Homo sapiens OX=9606 GN=APOA1 PE=1 SV=1	P02647 [3-19]	0	173101633	0	0.759	0.931798751303297	39.57	97.4	102.6	60.97	9.44	. Found	. Found	. Found	. Found	. Found	. Found	. Found	. Found	. Found	. Found	.	.	. Found	. Found	. Found	.	. Found	. Found	. Found	. Found	. Found	. Found	. Found	. Found	. Found	. Found	. Found	. Found	. Found
	High	[K].AKPALEDLR.[Q]	1xCarbamyl [K2]	P02647 1xCarbamyl [K232]	0,055497	0,00122162	7	P02647	Apolipoprotein A-I OS=Homo sapiens OX=9606 GN=APOA1 PE=1 SV=1	P02647 [231-239]	0	105558438	0	0.947	0.97619640388844	72.60	100.6	99.4	42.20	67.99	. Found	. Found	. Found	. Found	. Found	. Found	. Found	. Found	. Found	. Found	. Found	. Found	. Found	. Found	. Found	. Found	. Found	. Found	. Found	.	. Found	.	. Found	. Found	. Found	. Found	. Found	. Found	. Found
	High	[K].AKPALEDLR.[Q]			0,0235457	0,000840285	1225	P02647	Apolipoprotein A-I OS=Homo sapiens OX=9606 GN=APOA1 PE=1 SV=1	P02647 [231-239]	0	101257857	0	0.978	0.974874541096762	28.71	101.8	98.2	24.31	22.45	.	.	.	.	.	.	.	.	.	.	.	.	.	.	.	.	.	.	.	.	.	.	.	.	.	.	.	.	.
	High	[K].AKPALEDLRQGLLPVLESFK.[V]			1,90096E-06	0	434	P02647	Apolipoprotein A-I OS=Homo sapiens OX=9606 GN=APOA1 PE=1 SV=1	P02647 [231-250]	1	222426998	0	1.004	0.983306306909598	40.93	106.3	93.7	27.37	20.50	.	.	.	.	.	.	.	.	.	.	.	.	.	.	.	.	.	.	.	.	.	.	.	.	.	.	.	.	.
	High	[K].AKPALEDLRQGLLPVLESFKVSFLSALEEYTK.[K]			9,10901E-09	0	227	P02647	Apolipoprotein A-I OS=Homo sapiens OX=9606 GN=APOA1 PE=1 SV=1	P02647 [231-262]	2	359196726	0	1.563	0.909863605903733	146.96	152.3	47.7	142.01	158.29	. Found	.	. Found	.	.	.	.	.	.	.	.	.	.	. Found	. Found	.	.	.	. Found	. Found	. Found	. Found	. Found	. Found	. Found	. Found	. Found	.	.
	High	[K].AKVQPYLDDFQK.[K]			0,00070848	0	223	P02647	Apolipoprotein A-I OS=Homo sapiens OX=9606 GN=APOA1 PE=1 SV=1	P02647 [119-130]	1	145175291	0	1.020	0.990662691154869	36.48	101.9	98.1	28.66	19.49	.	.	.	.	.	.	.	.	.	.	.	.	.	.	.	.	.	.	.	.	.	.	.	.	.	.	.	.	.
	High	[K].AKVQPYLDDFQKK.[W]			0,000255735	0	251	P02647	Apolipoprotein A-I OS=Homo sapiens OX=9606 GN=APOA1 PE=1 SV=1	P02647 [119-131]	2	157984787	0	0.879	0.887982616367312	31.49	109.7	90.3	31.53	29.68	.	.	.	.	.	.	.	.	.	.	.	.	.	.	.	.	.	.	.	.	.	.	.	.	.	.	.	.	.
	High	[K].ATEHLSTLSEK.[A]	1xHNE [H4]	P02647 1xHNE [H223]	0,00913893	0,000750615	30	P02647	Apolipoprotein A-I OS=Homo sapiens OX=9606 GN=APOA1 PE=1 SV=1	P02647 [220-230]	0	137173659	0	0.395	0.0083229214913604	19.88	162.5	37.5	91.30	129.09	. Found	. Found	. Found	. Found	. Found	. Found	. Found	. Found	. Found	.	. Found	. Found	.	.	.	. Found	. Found	. Found	.	.	.	.	.	.	.	.	.	.	.
	High	[K].ATEHLSTLSEK.[A]			0,0010068	0	1440	P02647	Apolipoprotein A-I OS=Homo sapiens OX=9606 GN=APOA1 PE=1 SV=1	P02647 [220-230]	0	121562156	2	0.957	0.964369058686853	19.39	104.4	95.6	15.13	11.85	.	.	.	.	.	.	.	.	.	.	.	.	.	.	.	.	.	.	.	.	.	.	.	.	.	.	.	.	.
	High	[K].ATEHLSTLSEKAKPALEDLR.[Q]	1xCarbamyl [K]	P02647 1xCarbamyl [K]	0,0392714	0,000840285	18	P02647	Apolipoprotein A-I OS=Homo sapiens OX=9606 GN=APOA1 PE=1 SV=1	P02647 [220-239]	1	225218810	0	2.085	0.532640377458254	68.26	63.8	136.2	48.55	57.82	. Found	. Found	. Found	. Found	. Found	. Found	. Found	. Found	. Found	. Found	. Found	. Found	. Found	. Found	. Found	. Found	. Found	. Found	. Found	. Found	. Found	. Found	. Found	. Found	. Found	. Found	. Found	. Found	. Found
	High	[K].ATEHLSTLSEKAKPALEDLR.[Q]			5,36989E-05	0	32	P02647	Apolipoprotein A-I OS=Homo sapiens OX=9606 GN=APOA1 PE=1 SV=1	P02647 [220-239]	1	220918229	0	1.244	0.990662691154869	101.37	81.8	118.2	106.76	58.52	. Found	. Found	. Found	. Found	. Found	. Found	. Found	. Found	. Found	. Found	. Found	. Found	.	.	.	. Found	. Found	. Found	.	. Found	.	.	.	.	.	.	. Found	.	.
	High	[K].DLATVYVDVLK.[D]	1xHNE [K11]	P02647 1xHNE [K47]	0,0145744	0,000750615	16	P02647	Apolipoprotein A-I OS=Homo sapiens OX=9606 GN=APOA1 PE=1 SV=1	P02647 [37-47]	0	139180321	0	1.451	0.966092194561975	61.68	82.3	117.7	35.48	50.82	. Found	. Found	. Found	.	. Found	. Found	. Found	. Found	. Found	. Found	. Found	.	. Found	.	.	. Found	. Found	. Found	. Found	. Found	. Found	.	.	. Found	. Found	. Found	. Found	.	. Found
	High	[K].DLATVYVDVLK.[D]			0,00121388	0	1665	P02647	Apolipoprotein A-I OS=Homo sapiens OX=9606 GN=APOA1 PE=1 SV=1	P02647 [37-47]	0	123568818	0	1.074	0.999209963067217	21.55	96.9	103.1	14.11	14.02	.	.	.	.	.	.	.	.	.	.	.	.	.	.	.	.	.	.	.	.	.	.	.	.	.	.	.	.	.
	High	[K].DLATVYVDVLKDSGR.[D]			4,69749E-05	0	606	P02647	Apolipoprotein A-I OS=Homo sapiens OX=9606 GN=APOA1 PE=1 SV=1	P02647 [37-51]	1	165086973	0	1.059	0.999209963067217	43.26	106.8	93.2	32.50	24.79	.	.	.	.	.	.	.	.	.	.	.	.	.	.	.	.	.	.	.	.	.	.	.	.	.	.	.	.	.
	High	[K].DLATVYVDVLKDSGRDYVSQFEGSALGK.[Q]			5,72228E-07	0	430	P02647	Apolipoprotein A-I OS=Homo sapiens OX=9606 GN=APOA1 PE=1 SV=1	P02647 [37-64]	2	303252112	0	0.856	0.853269166753836	68.35	114.9	85.1	68.75	75.05	.	.	.	.	.	.	.	.	.	.	.	.	.	.	.	.	.	.	.	.	.	.	.	.	.	.	.	.	.
	High	[K].DLATVYVDVLKDSGRDYVSQFEGSALGK.[Q]	1xCarbamyl [K11]	P02647 1xCarbamyl [K47]	0,235977	0,00864128	2	P02647	Apolipoprotein A-I OS=Homo sapiens OX=9606 GN=APOA1 PE=1 SV=1	P02647 [37-64]	2	307552693	0	0.646	0.810929759445222	22.67	88.0	112.0	30.66	99.39	. Found	. Found	.	. Found	. Found	. Found	. Found	. Found	. Found	. Found	. Found	. Found	. Found	. Found	. Found	. Found	. Found	. Found	. Found	. Found	. Found	. Found	. Found	. Found	. Found	. Found	. Found	. Found	. Found
	High	[K].DLEEVKAK.[V]			0,053563	0,0010353	255	P02647	Apolipoprotein A-I OS=Homo sapiens OX=9606 GN=APOA1 PE=1 SV=1	P02647 [113-120]	1	93150949	20	0.915	0.935524349630532	66.86	113.2	86.8	61.95	65.92	.	.	.	.	.	.	.	.	.	.	.	.	.	.	.	.	.	.	.	.	.	.	.	.	.	.	.	.	.
	High	[K].DSGRDYVSQFEGSALGK.[Q]	1xHNE [K17]	P02647 1xHNE [K64]	0,000675209	0	18	P02647	Apolipoprotein A-I OS=Homo sapiens OX=9606 GN=APOA1 PE=1 SV=1	P02647 [48-64]	1	197196581	0	0.993	0.990981590338927	54.48	92.7	107.3	34.33	31.24	.	.	.	.	.	.	.	.	.	. Found	.	. Found	. Found	. Found	. Found	. Found	. Found	. Found	. Found	. Found	. Found	. Found	. Found	. Found	. Found	. Found	. Found	. Found	. Found
	High	[K].DSGRDYVSQFEGSALGK.[Q]			9,08423E-06	0	2196	P02647	Apolipoprotein A-I OS=Homo sapiens OX=9606 GN=APOA1 PE=1 SV=1	P02647 [48-64]	1	181585078	0	1.038	0.995100645389845	29.57	101.1	98.9	16.87	25.38	.	.	.	.	.	.	.	.	.	.	.	.	.	.	.	.	.	.	.	.	.	.	.	.	.	.	.	.	.
	High	[K].DSGRDYVSQFEGSALGKQLNLK.[L]	1xCarbamyl [K17]	P02647 1xCarbamyl [K64]	0,0202185	0,000840285	2	P02647	Apolipoprotein A-I OS=Homo sapiens OX=9606 GN=APOA1 PE=1 SV=1	P02647 [48-69]	2	245522119	0								. Found	. Found	. Found	. Found	. Found	. Found	. Found	. Found	. Found	. Found	. Found	. Found	. Found	. Found	. Found	. Found	. Found	. Found	. Found	. Found	. Found	. Found	. Found	. Found	. Found	. Found	. Found	. Found	. Found
	High	[K].DSGRDYVSQFEGSALGKQLNLK.[L]			3,41446E-05	0	16	P02647	Apolipoprotein A-I OS=Homo sapiens OX=9606 GN=APOA1 PE=1 SV=1	P02647 [48-69]	2	241221538	0	1.921	0.690796227022237	91.95	59.6	140.4	72.50	69.69	. Found	. Found	. Found	. Found	. Found	. Found	. Found	. Found	. Found	. Found	.	. Found	.	.	.	. Found	. Found	. Found	. Found	. Found	. Found	. Found	. Found	.	. Found	. Found	. Found	. Found	. Found
	High	[K].ETEGLRQEMSK.[D]	1xOxidation [M9]		0,0026994	0,000313424	325	P02647	Apolipoprotein A-I OS=Homo sapiens OX=9606 GN=APOA1 PE=1 SV=1	P02647 [102-112]	1	132362091	0	0.949	0.963035294423709	69.63	97.6	102.4	91.59	46.94	.	.	.	.	.	.	.	.	.	.	.	.	.	.	.	.	.	.	.	.	.	.	.	.	.	.	.	.	.
	High	[K].ETEGLRQEMSK.[D]			0,00109018	0	185	P02647	Apolipoprotein A-I OS=Homo sapiens OX=9606 GN=APOA1 PE=1 SV=1	P02647 [102-112]	1	130762599	0	0.838	0.822886663287472	45.70	116.0	84.0	42.80	37.21	.	.	.	.	.	.	.	.	.	.	.	.	.	.	.	.	.	.	.	.	.	.	.	.	.	.	.	.	.
	High	[K].ETEGLRQEMSKDLEEVK.[A]			1,49895E-05	0	428	P02647	Apolipoprotein A-I OS=Homo sapiens OX=9606 GN=APOA1 PE=1 SV=1	P02647 [102-118]	2	202098556	0	1.196	0.974874541096762	58.39	97.1	102.9	47.25	35.06	.	.	.	.	.	.	.	.	.	.	.	.	.	.	.	.	.	.	.	.	.	.	.	.	.	.	.	.	.
	High	[K].ETEGLRQEMSKDLEEVK.[A]	1xOxidation [M9]		6,37458E-05	0	426	P02647	Apolipoprotein A-I OS=Homo sapiens OX=9606 GN=APOA1 PE=1 SV=1	P02647 [102-118]	2	203698048	0	0.893	0.909863605903733	95.86	99.1	100.9	106.78	99.08	.	.	.	.	.	.	.	.	.	.	.	.	.	.	.	.	.	.	.	.	.	.	.	.	.	.	.	.	.
	High	[K].ETEGLRQEMSKDLEEVK.[A]	1xCarbamyl [K]; 1xHNE [K]	P02647 1xCarbamyl [K]; 1xHNE [K]	0,193029	0,00643402	13	P02647	Apolipoprotein A-I OS=Homo sapiens OX=9606 GN=APOA1 PE=1 SV=1	P02647 [102-118]	2	222010640	0	1.178	0.977134742088879	72.06	93.8	106.2	56.52	26.92	. Found	. Found	. Found	. Found	. Found	. Found	.	.	. Found	. Found	. Found	.	. Found	. Found	. Found	. Found	.	. Found	. Found	. Found	. Found	. Found	. Found	. Found	. Found	. Found	. Found	. Found	. Found
	High	[K].ETEGLRQEMSKDLEEVK.[A]	1xCarbamyl [K11]	P02647 1xCarbamyl [K112]	0,00225863	0,000313424	35	P02647	Apolipoprotein A-I OS=Homo sapiens OX=9606 GN=APOA1 PE=1 SV=1	P02647 [102-118]	2	206399137	0	1.580	0.905489059685449	100.97	86.5	113.5	70.61	77.45	. Found	. Found	. Found	.	.	.	. Found	. Found	. Found	.	.	.	.	.	. Found	.	.	.	. Found	.	.	. Found	. Found	. Found	. Found	. Found	.	. Found	. Found
	High	[K].KWQEEMELYR.[Q]	1xOxidation [M6]		0,00203809	0,000313424	966	P02647	Apolipoprotein A-I OS=Homo sapiens OX=9606 GN=APOA1 PE=1 SV=1	P02647 [131-140]	1	142766238	0	1.083	0.999850434146449	114.29	91.5	108.5	82.09	78.95	.	.	.	.	.	.	.	.	.	.	.	.	.	.	.	.	.	.	.	.	.	.	.	.	.	.	.	.	.
	High	[K].KWQEEMELYR.[Q]			0,000677532	0	625	P02647	Apolipoprotein A-I OS=Homo sapiens OX=9606 GN=APOA1 PE=1 SV=1	P02647 [131-140]	1	141166746	0	0.788	0.708913404035836	82.32	112.7	87.3	84.67	70.72	.	.	.	.	.	.	.	.	.	.	.	.	.	.	.	.	.	.	.	.	.	.	.	.	.	.	.	.	.
	High	[K].LHELQEK.[L]			0,0681912	0,00158954	390	P02647	Apolipoprotein A-I OS=Homo sapiens OX=9606 GN=APOA1 PE=1 SV=1	P02647 [158-164]	0	89648361	0	0.934	0.953573241241185	51.88	104.2	95.8	37.47	36.46	.	.	.	.	.	.	.	.	.	.	.	.	.	.	.	.	.	.	.	.	.	.	.	.	.	.	.	.	.
	High	[K].LHELQEKLSPLGEEMR.[D]	1xHNE [H2]	P02647 1xHNE [H159]	0,182832	0,00643402	1	P02647	Apolipoprotein A-I OS=Homo sapiens OX=9606 GN=APOA1 PE=1 SV=1	P02647 [158-173]	1	206509980	0								. Found	. Found	. Found	. Found	. Found	. Found	. Found	. Found	. Found	. Found	. Found	. Found	. Found	. Found	. Found	. Found	. Found	.	. Found	. Found	. Found	. Found	. Found	. Found	. Found	. Found	. Found	. Found	. Found
	High	[K].LLDNWDSVTSTFSK.[L]			4,81165E-05	0	5186	P02647	Apolipoprotein A-I OS=Homo sapiens OX=9606 GN=APOA1 PE=1 SV=1	P02647 [70-83]	0	161278533	3	0.993	0.977134742088879	29.66	98.6	101.4	27.76	16.26	.	.	.	.	.	.	.	.	.	.	.	.	.	.	.	.	.	.	.	.	.	.	.	.	.	.	.	.	.
	High	[K].LLDNWDSVTSTFSK.[L]	1xHNE [K14]	P02647 1xHNE [K83]	0,0459189	0,000840285	3	P02647	Apolipoprotein A-I OS=Homo sapiens OX=9606 GN=APOA1 PE=1 SV=1	P02647 [70-83]	0	176890036	0	1.401	0.951270124670046	81.06	82.6	117.4	58.29	58.84	. Found	. Found	. Found	. Found	. Found	. Found	. Found	. Found	. Found	. Found	. Found	. Found	. Found	. Found	. Found	. Found	. Found	. Found	. Found	. Found	. Found	. Found	. Found	. Found	.	. Found	. Found	. Found	. Found
	High	[K].LLDNWDSVTSTFSKLR.[E]			2,22385E-05	0	92	P02647	Apolipoprotein A-I OS=Homo sapiens OX=9606 GN=APOA1 PE=1 SV=1	P02647 [70-85]	1	188197050	0	1.013	0.964369058686853	63.77	100.4	99.6	48.18	47.02	.	.	.	.	.	.	.	.	.	.	.	.	.	.	.	.	.	.	.	.	.	.	. Found	. Found	.	.	.	.	.
	High	[K].LLDNWDSVTSTFSKLR.[E]	1xCarbamyl [K14]	P02647 1xCarbamyl [K83]	0,0526234	0,0010353	1	P02647	Apolipoprotein A-I OS=Homo sapiens OX=9606 GN=APOA1 PE=1 SV=1	P02647 [70-85]	1	192497632	0								. Found	. Found	. Found	. Found	. Found	. Found	. Found	. Found	. Found	. Found	. Found	. Found	. Found	. Found	. Found	. Found	. Found	. Found	. Found	.	. Found	. Found	. Found	. Found	. Found	. Found	. Found	. Found	. Found
	High	[K].LREQLGPVTQEFWDNLEK.[E]			1,66864E-06	0	1421	P02647	Apolipoprotein A-I OS=Homo sapiens OX=9606 GN=APOA1 PE=1 SV=1	P02647 [84-101]	1	220211896	0	1.107	0.998870208090446	34.92	92.0	108.0	22.88	26.09	.	.	.	.	.	.	.	.	.	.	.	.	.	.	.	.	.	.	.	.	.	.	.	.	.	.	.	.	.
	High	[K].LREQLGPVTQEFWDNLEKETEGLR.[Q]			1,6868E-10	0	1020	P02647	Apolipoprotein A-I OS=Homo sapiens OX=9606 GN=APOA1 PE=1 SV=1	P02647 [84-107]	2	288745846	0	1.289	0.928362420682118	64.38	92.5	107.5	38.86	56.87	.	.	.	.	.	.	.	.	.	.	.	.	.	.	.	.	.	.	.	.	.	.	.	.	.	.	.	.	.
	High	[K].LSPLGEEMR.[D]			0,0103449	0,000750615	654	P02647	Apolipoprotein A-I OS=Homo sapiens OX=9606 GN=APOA1 PE=1 SV=1	P02647 [165-173]	0	103151901	0	1.088	0.999209963067217	56.00	98.7	101.3	44.87	24.22	.	.	.	.	.	.	.	.	.	.	.	.	.	.	.	.	.	.	.	.	.	.	.	.	.	.	.	.	.
	High	[K].LSPLGEEMR.[D]	1xOxidation [M8]		0,0146913	0,000750615	805	P02647	Apolipoprotein A-I OS=Homo sapiens OX=9606 GN=APOA1 PE=1 SV=1	P02647 [165-173]	0	104751392	0	1.081	0.999850434146449	86.36	95.3	104.7	68.72	53.45	.	.	.	.	.	.	.	.	.	.	.	.	.	.	.	.	.	.	.	.	.	.	.	.	.	.	.	.	.
	High	[K].LSPLGEEMRDR.[A]			0,0305214	0,000840285	138	P02647	Apolipoprotein A-I OS=Homo sapiens OX=9606 GN=APOA1 PE=1 SV=1	P02647 [165-175]	1	130264706	0	0.900	0.919820640564646	46.33	109.8	90.2	65.89	44.39	.	.	.	.	.	.	.	.	.	.	.	.	. Found	. Found	. Found	.	.	.	. Found	. Found	. Found	. Found	. Found	. Found	. Found	.	. Found	.	.
	High	[K].LSPLGEEMRDR.[A]	1xOxidation [M8]		0,0770806	0,00176323	449	P02647	Apolipoprotein A-I OS=Homo sapiens OX=9606 GN=APOA1 PE=1 SV=1	P02647 [165-175]	1	131864198	0	1.018	0.990311888894351	122.32	100.4	99.6	101.65	95.50	.	.	.	.	.	.	.	.	.	.	.	.	.	.	.	.	.	.	.	.	.	.	.	.	.	.	.	.	.
	High	[K].QLNLKLLDNWDSVTSTFSK.[L]	1xCarbamyl [K5]	P02647 1xCarbamyl [K69]	0,200112	0,00690455	3	P02647	Apolipoprotein A-I OS=Homo sapiens OX=9606 GN=APOA1 PE=1 SV=1	P02647 [65-83]	1	225215574	0	1.162	0.983306306909598	95.46	100.0	100.0	137.25	83.89	. Found	. Found	. Found	. Found	. Found	. Found	. Found	. Found	. Found	. Found	. Found	. Found	. Found	. Found	. Found	. Found	. Found	. Found	. Found	. Found	.	.	. Found	. Found	. Found	. Found	. Found	. Found	. Found
	High	[K].QLNLKLLDNWDSVTSTFSK.[L]			0,00165583	0	11	P02647	Apolipoprotein A-I OS=Homo sapiens OX=9606 GN=APOA1 PE=1 SV=1	P02647 [65-83]	1	220914992	0	2.627	0.291181215608846	104.49	57.6	142.4	55.34	83.63	. Found	.	.	.	.	. Found	. Found	. Found	. Found	. Found	. Found	. Found	. Found	. Found	. Found	. Found	. Found	. Found	.	. Found	. Found	. Found	. Found	. Found	. Found	. Found	. Found	. Found	. Found
	High	[K].VEPLRAELQEGAR.[Q]			0,00541847	0,000313424	525	P02647	Apolipoprotein A-I OS=Homo sapiens OX=9606 GN=APOA1 PE=1 SV=1	P02647 [143-155]	1	146779142	0	1.006	0.983306306909598	27.17	98.9	101.1	21.68	18.45	.	.	.	.	.	.	.	.	.	.	.	.	.	.	.	.	.	.	.	.	.	.	.	.	.	.	.	.	.
	High	[K].VQPYLDDFQK.[K]	1xHNE [K10]	P02647 1xHNE [K130]	0,00953556	0,000750615	1	P02647	Apolipoprotein A-I OS=Homo sapiens OX=9606 GN=APOA1 PE=1 SV=1	P02647 [121-130]	0	140873586	0	1.176	0.983306306909598	97.74	77.3	122.7	80.28	153.57	. Found	. Found	. Found	. Found	. Found	. Found	. Found	.	. Found	. Found	. Found	. Found	. Found	. Found	. Found	. Found	. Found	. Found	. Found	. Found	. Found	. Found	. Found	. Found	. Found	. Found	. Found	. Found	. Found
	High	[K].VQPYLDDFQK.[K]			0,0127339	0,000750615	432	P02647	Apolipoprotein A-I OS=Homo sapiens OX=9606 GN=APOA1 PE=1 SV=1	P02647 [121-130]	0	125262083	0	0.965	0.965273814243824	28.86	101.2	98.8	22.32	17.30	.	.	.	.	.	.	.	.	.	.	.	.	.	.	.	.	.	.	.	.	.	.	.	.	.	.	.	.	.
	High	[K].VQPYLDDFQKK.[W]			0,00130126	0	1768	P02647	Apolipoprotein A-I OS=Homo sapiens OX=9606 GN=APOA1 PE=1 SV=1	P02647 [121-131]	1	138071579	1	1.047	0.9978074069585	30.40	94.4	105.6	24.47	15.53	.	.	.	.	.	.	.	.	.	.	.	.	.	.	.	.	.	.	.	.	.	.	.	.	.	.	.	.	.
	High	[K].VQPYLDDFQKKWQEEMELYR.[Q]			0,00011901	0	23	P02647	Apolipoprotein A-I OS=Homo sapiens OX=9606 GN=APOA1 PE=1 SV=1	P02647 [121-140]	2	264527045	0	2.275	0.231375187122749	134.69	93.7	106.3	118.28	125.08	.	. Found	.	.	.	.	.	.	.	.	.	.	. Found	. Found	. Found	. Found	. Found	. Found	. Found	. Found	. Found	. Found	. Found	. Found	. Found	. Found	. Found	. Found	. Found
	High	[K].VQPYLDDFQKKWQEEMELYR.[Q]	1xOxidation [M16]		0,000315256	0	71	P02647	Apolipoprotein A-I OS=Homo sapiens OX=9606 GN=APOA1 PE=1 SV=1	P02647 [121-140]	2	266126536	0	3.373	0.0336683304883493	119.59	46.2	153.8	86.05	169.37	.	. Found	. Found	. Found	. Found	.	. Found	. Found	. Found	.	.	.	.	.	.	.	. Found	.	.	.	.	.	. Found	.	.	.	.	.	.
	High	[K].VQPYLDDFQKKWQEEMELYR.[Q]	1xCarbamyl [K]; 1xHNE [K]	P02647 1xCarbamyl [K]; 1xHNE [K]	0,137049	0,00472966	12	P02647	Apolipoprotein A-I OS=Homo sapiens OX=9606 GN=APOA1 PE=1 SV=1	P02647 [121-140]	2	284439129	0	0.493	0.499897580805023	25.36	133.8	66.2	224.54	93.89	. Found	. Found	. Found	. Found	. Found	. Found	.	.	. Found	. Found	. Found	. Found	. Found	. Found	. Found	. Found	. Found	. Found	. Found	. Found	. Found	. Found	. Found	. Found	. Found	. Found	. Found	. Found	. Found
	High	[K].VSFLSALEEYTK.[K]			0,000295365	0	1307	P02647	Apolipoprotein A-I OS=Homo sapiens OX=9606 GN=APOA1 PE=1 SV=1	P02647 [251-262]	0	138671512	0	1.113	0.998019339144021	54.74	95.7	104.3	34.54	32.51	.	.	.	.	.	.	.	.	.	.	.	.	.	.	.	.	.	.	.	.	.	.	.	.	.	.	.	.	.
	High	[K].VSFLSALEEYTKK.[L]			0,000131909	0	1909	P02647	Apolipoprotein A-I OS=Homo sapiens OX=9606 GN=APOA1 PE=1 SV=1	P02647 [251-263]	1	151481009	0	1.067	0.999209963067217	39.10	96.8	103.2	31.41	20.77	.	.	.	.	.	.	.	.	.	.	.	.	.	.	.	.	.	.	.	.	.	.	.	.	.	.	.	.	.
	High	[K].VSFLSALEEYTKKLNTQ.[-]			0,000104465	0	8	P02647	Apolipoprotein A-I OS=Homo sapiens OX=9606 GN=APOA1 PE=1 SV=1	P02647 [251-267]	2	197104333	0	1.685	0.814568714331598	82.69	73.5	126.5	65.37	76.13	. Found	. Found	. Found	. Found	.	. Found	. Found	. Found	. Found	.	.	. Found	. Found	. Found	. Found	. Found	. Found	. Found	. Found	. Found	. Found	. Found	. Found	. Found	.	. Found	.	. Found	. Found
	High	[K].WQEEMELYR.[Q]	1xOxidation [M5]		0,0075173	0,000591694	1482	P02647	Apolipoprotein A-I OS=Homo sapiens OX=9606 GN=APOA1 PE=1 SV=1	P02647 [132-140]	0	129956741	0	1.059	0.999209963067217	83.25	100.4	99.6	58.86	55.40	.	.	.	.	.	.	.	.	.	.	.	.	.	.	.	.	.	.	.	.	.	.	.	.	.	.	.	.	.
	High	[K].WQEEMELYR.[Q]			0,00407793	0,000313424	1481	P02647	Apolipoprotein A-I OS=Homo sapiens OX=9606 GN=APOA1 PE=1 SV=1	P02647 [132-140]	0	128357250	1	0.854	0.850121488847673	72.81	103.2	96.8	83.26	55.09	.	.	.	.	.	.	.	.	.	.	.	.	.	.	.	.	.	.	.	.	.	.	.	.	.	.	.	.	.
	High	[R].AELQEGAR.[Q]			0,0314395	0,000840285	285	P02647	Apolipoprotein A-I OS=Homo sapiens OX=9606 GN=APOA1 PE=1 SV=1	P02647 [148-155]	0	87344247	0	0.830	0.807427137856981	57.46	128.8	71.2	52.90	45.09	.	.	.	.	.	.	.	.	.	.	.	.	.	.	.	.	.	.	.	.	.	.	.	.	.	.	.	.	.
	High	[R].AHVDALR.[T]	1xHNE [H2]	P02647 1xHNE [H179]	0,0844612	0,00250817	41	P02647	Apolipoprotein A-I OS=Homo sapiens OX=9606 GN=APOA1 PE=1 SV=1	P02647 [178-184]	0	93754654	0	0.940	0.875100462260994	110.89	109.9	90.1	124.38	90.37	. Found	. Found	. Found	. Found	. Found	. Found	. Found	. Found	. Found	. Found	.	. Found	.	.	.	. Found	. Found	. Found	.	.	.	.	.	.	.	.	.	.	.
	High	[R].AHVDALR.[T]			0,0921631	0,00268565	372	P02647	Apolipoprotein A-I OS=Homo sapiens OX=9606 GN=APOA1 PE=1 SV=1	P02647 [178-184]	0	78143151	0	1.007	0.983306306909598	34.87	94.7	105.3	25.13	17.97	.	.	.	.	.	.	.	.	.	.	.	.	.	.	.	.	.	.	.	.	.	.	.	.	.	.	.	.	.
	High	[R].AHVDALRTHLAPYSDELR.[Q]			0,00204531	0,000313424	19	P02647	Apolipoprotein A-I OS=Homo sapiens OX=9606 GN=APOA1 PE=1 SV=1	P02647 [178-195]	1	206406211	0	0.293	0.000479897610035475	8.22	158.6	41.4	33.99	97.70	.	.	.	.	.	.	.	.	.	. Found	. Found	. Found	. Found	. Found	. Found	. Found	. Found	. Found	. Found	. Found	. Found	. Found	. Found	. Found	. Found	. Found	. Found	. Found	. Found
	High	[R].AHVDALRTHLAPYSDELRQR.[L]			1,28015E-05	0	139	P02647	Apolipoprotein A-I OS=Homo sapiens OX=9606 GN=APOA1 PE=1 SV=1	P02647 [178-197]	2	234822180	0	0.922	0.888486656913604	107.75	96.9	103.1	102.73	106.51	.	.	.	.	.	.	.	.	.	.	.	.	.	.	.	.	. Found	.	.	.	.	.	.	.	.	.	.	.	.
	High	[R].ARAHVDALR.[T]			0,00817553	0,000750615	298	P02647	Apolipoprotein A-I OS=Homo sapiens OX=9606 GN=APOA1 PE=1 SV=1	P02647 [176-184]	1	100856974	0	0.894	0.909863605903733	88.85	115.0	85.0	86.17	68.18	.	.	.	.	.	.	.	.	.	.	.	.	.	.	.	.	.	.	.	.	.	.	.	.	.	.	.	.	.
	High	[R].ARAHVDALRTHLAPYSDELR.[Q]			0,00245996	0,000313424	29	P02647	Apolipoprotein A-I OS=Homo sapiens OX=9606 GN=APOA1 PE=1 SV=1	P02647 [176-195]	2	229120034	0	0.927	0.885030648588435	108.07	103.2	96.8	90.47	94.17	.	.	.	. Found	.	.	.	.	.	. Found	.	.	. Found	. Found	. Found	. Found	. Found	. Found	. Found	. Found	. Found	. Found	. Found	. Found	. Found	.	. Found	. Found	. Found
	High	[R].DYVSQFEGSALGK.[Q]			0,000566774	0	951	P02647	Apolipoprotein A-I OS=Homo sapiens OX=9606 GN=APOA1 PE=1 SV=1	P02647 [52-64]	0	140066924	1	1.004	0.983306306909598	21.37	98.3	101.7	17.17	15.36	.	.	.	.	.	.	.	.	.	.	.	.	.	.	.	.	.	.	.	.	.	.	.	.	.	.	.	.	.
	High	[R].DYVSQFEGSALGK.[Q]	1xHNE [K13]	P02647 1xHNE [K64]	0,158748	0,00604328	4	P02647	Apolipoprotein A-I OS=Homo sapiens OX=9606 GN=APOA1 PE=1 SV=1	P02647 [52-64]	0	155678427	0	1.214	0.987093671297076	51.11	85.1	114.9	30.34	32.71	. Found	. Found	. Found	. Found	. Found	. Found	. Found	. Found	. Found	. Found	. Found	. Found	. Found	. Found	. Found	. Found	. Found	. Found	. Found	. Found	. Found	. Found	. Found	. Found	. Found	. Found	. Found	. Found	. Found
	High	[R].DYVSQFEGSALGKQLNLK.[L]			0,000101638	0	16	P02647	Apolipoprotein A-I OS=Homo sapiens OX=9606 GN=APOA1 PE=1 SV=1	P02647 [52-69]	1	199703383	0	1.548	0.867744089062386	85.97	107.8	92.2	68.80	60.72	. Found	. Found	. Found	. Found	. Found	. Found	. Found	. Found	. Found	. Found	. Found	. Found	. Found	. Found	. Found	. Found	. Found	. Found	. Found	.	.	.	.	.	. Found	. Found	. Found	. Found	. Found
	High	[R].EQLGPVTQEFWDNLEK.[E]			7,18774E-05	0	463	P02647	Apolipoprotein A-I OS=Homo sapiens OX=9606 GN=APOA1 PE=1 SV=1	P02647 [86-101]	0	193293378	0	1.042	0.996290224812264	54.20	99.4	100.6	33.71	42.44	.	.	.	.	.	.	.	.	.	.	.	.	.	.	.	.	.	.	.	.	.	.	.	.	.	.	.	.	.
	High	[R].EQLGPVTQEFWDNLEKETEGLR.[Q]			1,30348E-06	0	332	P02647	Apolipoprotein A-I OS=Homo sapiens OX=9606 GN=APOA1 PE=1 SV=1	P02647 [86-107]	1	261827329	0	1.289	0.928294931537033	71.93	88.3	111.7	52.45	62.54	.	.	.	.	.	.	.	.	.	.	.	.	.	.	.	.	.	.	.	.	.	.	.	.	.	.	.	.	.
	High	[R].EQLGPVTQEFWDNLEKETEGLRQEMSK.[D]	1xCarbamyl [K]	P02647 1xCarbamyl [K]	0,000582547	0	18	P02647	Apolipoprotein A-I OS=Homo sapiens OX=9606 GN=APOA1 PE=1 SV=1	P02647 [86-112]	2	326454775	0	1.139	0.998019339144021	106.00	92.8	107.2	57.61	113.95	. Found	. Found	. Found	. Found	.	. Found	. Found	. Found	. Found	.	.	. Found	. Found	. Found	. Found	.	. Found	.	. Found	. Found	. Found	. Found	. Found	. Found	. Found	.	. Found	. Found	. Found
	High	[R].EQLGPVTQEFWDNLEKETEGLRQEMSK.[D]	1xCarbamyl [K16]; 1xOxidation [M25]	P02647 1xCarbamyl [K101]	0,00830169	0,000750615	4	P02647	Apolipoprotein A-I OS=Homo sapiens OX=9606 GN=APOA1 PE=1 SV=1	P02647 [86-112]	2	328054266	0	1.229	0.974874541096762	24.16	91.2	108.8		97.59	. Found	. Found	. Found	. Found	. Found	. Found	. Found	. Found	. Found	. Found	. Found	. Found	. Found	. Found	. Found	.	. Found	. Found	. Found	. Found	. Found	. Found	. Found	. Found	. Found	. Found	. Found	. Found	. Found
	High	[R].EQLGPVTQEFWDNLEKETEGLRQEMSK.[D]	1xOxidation [M25]		1,96056E-06	0	561	P02647	Apolipoprotein A-I OS=Homo sapiens OX=9606 GN=APOA1 PE=1 SV=1	P02647 [86-112]	2	323753685	0	1.118	0.997640674721491	106.26	101.3	98.7	99.20	79.43	.	.	.	.	.	.	.	.	.	.	.	.	.	.	.	.	.	.	.	.	.	.	.	.	.	.	.	.	.
	High	[R].EQLGPVTQEFWDNLEKETEGLRQEMSK.[D]			2,27997E-06	0	235	P02647	Apolipoprotein A-I OS=Homo sapiens OX=9606 GN=APOA1 PE=1 SV=1	P02647 [86-112]	2	322154193	0	1.188	0.97619640388844	113.60	89.7	110.3	82.59	93.62	.	.	.	.	.	.	.	.	.	.	.	.	.	.	.	.	.	.	.	.	.	.	.	.	.	.	.	.	.
	High	[R].HFWQQDEPPQSPWDR.[V]			2,5885E-06	0	166	P02647	Apolipoprotein A-I OS=Homo sapiens OX=9606 GN=APOA1 PE=1 SV=1	P02647 [20-34]	0	195286743	0	1.197	0.982498184404383	47.82	93.0	107.0	33.56	31.93	.	.	.	.	.	.	.	.	. Found	.	.	.	.	.	.	.	.	.	. Found	.	.	.	.	.	.	.	.	.	.
	High	[R].HFWQQDEPPQSPWDR.[V]	1xHNE [H1]	P02647 1xHNE [H20]	9,27313E-06	0	2898	P02647	Apolipoprotein A-I OS=Homo sapiens OX=9606 GN=APOA1 PE=1 SV=1	P02647 [20-34]	0	210898246	2	1.170	0.98039981659082	57.39	91.0	109.0	37.02	41.19	.	.	.	.	.	.	.	.	.	.	.	.	.	.	.	.	.	.	.	.	.	.	.	.	.	.	.	.	.
	High	[R].HFWQQDEPPQSPWDRVKDLATVYVDVLK.[D]	1xCarbamyl [K17]	P02647 1xCarbamyl [K36]	0,247669	0,00995009	3	P02647	Apolipoprotein A-I OS=Homo sapiens OX=9606 GN=APOA1 PE=1 SV=1	P02647 [20-47]	2	343970696	0	0.297	0.00047778606518905	2.20	155.1	44.9			. Found	. Found	. Found	. Found	. Found	. Found	. Found	. Found	. Found	. Found	. Found	. Found	. Found	. Found	. Found	. Found	. Found	. Found	.	.	.	. Found	. Found	. Found	. Found	. Found	. Found	. Found	. Found
	High	[R].LAARLEALK.[E]			0,0710248	0,00158954	17	P02647	Apolipoprotein A-I OS=Homo sapiens OX=9606 GN=APOA1 PE=1 SV=1	P02647 [198-206]	1	98462004	0	0.933	0.864403460667438	51.92	114.5	85.5	43.85	47.21	. Found	.	. Found	.	.	.	.	.	. Found	. Found	. Found	. Found	. Found	. Found	.	. Found	. Found	. Found	. Found	. Found	. Found	.	.	.	. Found	. Found	. Found	.	. Found
	High	[R].LAARLEALKENGGAR.[L]			0,00019977	0	187	P02647	Apolipoprotein A-I OS=Homo sapiens OX=9606 GN=APOA1 PE=1 SV=1	P02647 [198-212]	2	156888671	0	0.860	0.859957381458777	45.90	92.6	107.4	37.10	47.76	.	.	.	.	.	.	.	.	.	.	.	.	.	.	.	.	.	.	.	.	.	.	.	.	.	.	.	.	.
	High	[R].LAEYHAK.[A]	1xHNE [H5]	P02647 1xHNE [H217]	0,0631671	0,00141145	29	P02647	Apolipoprotein A-I OS=Homo sapiens OX=9606 GN=APOA1 PE=1 SV=1	P02647 [213-219]	0	98755096	0	0.362	0.0115770031301411	15.54	119.2	80.8	102.56	85.49	. Found	. Found	. Found	. Found	. Found	. Found	. Found	. Found	. Found	. Found	. Found	.	.	.	.	. Found	. Found	. Found	. Found	.	.	.	.	.	.	.	.	.	.
	High	[R].LAEYHAK.[A]			0,0475557	0,000840285	487	P02647	Apolipoprotein A-I OS=Homo sapiens OX=9606 GN=APOA1 PE=1 SV=1	P02647 [213-219]	0	83143593	0	0.923	0.945155001458806	53.75	94.8	105.2	48.99	27.64	.	.	.	.	.	.	.	.	.	.	.	.	.	.	.	.	.	.	.	.	.	.	.	.	.	.	.	.	.
	High	[R].LAEYHAKATEHLSTLSEK.[A]			0,00131035	0	30	P02647	Apolipoprotein A-I OS=Homo sapiens OX=9606 GN=APOA1 PE=1 SV=1	P02647 [213-230]	1	202803964	0	0.988	0.984414833138462	77.62	114.6	85.4	58.02	49.03	.	.	.	. Found	. Found	. Found	. Found	. Found	. Found	.	.	.	.	.	.	.	.	.	. Found	. Found	. Found	. Found	.	.	. Found	. Found	. Found	.	. Found
	High	[R].LAEYHAKATEHLSTLSEK.[A]	1xCarbamyl [K7]	P02647 1xCarbamyl [K219]	0,0188631	0,000840285	3	P02647	Apolipoprotein A-I OS=Homo sapiens OX=9606 GN=APOA1 PE=1 SV=1	P02647 [213-230]	1	207104546	0								. Found	. Found	. Found	. Found	. Found	. Found	. Found	. Found	. Found	. Found	. Found	. Found	. Found	. Found	. Found	. Found	. Found	. Found	. Found	.	. Found	. Found	. Found	. Found	. Found	. Found	. Found	. Found	. Found
	High	[R].LEALKENGGAR.[L]	1xCarbamyl [K5]	P02647 1xCarbamyl [K206]	0,176312	0,00643402	3	P02647	Apolipoprotein A-I OS=Homo sapiens OX=9606 GN=APOA1 PE=1 SV=1	P02647 [202-212]	1	120063313	0								. Found	. Found	. Found	. Found	. Found	. Found	. Found	. Found	. Found	. Found	. Found	. Found	. Found	. Found	. Found	. Found	. Found	. Found	. Found	. Found	. Found	. Found	. Found	. Found	. Found	. Found	. Found	. Found	. Found
	High	[R].LEALKENGGAR.[L]			0,00274819	0,000313424	384	P02647	Apolipoprotein A-I OS=Homo sapiens OX=9606 GN=APOA1 PE=1 SV=1	P02647 [202-212]	1	115762731	0	0.979	0.975038780283934	54.05	100.6	99.4	45.14	28.25	.	.	.	.	.	.	.	.	.	.	.	.	.	.	.	.	.	.	.	.	.	.	.	.	.	.	.	.	.
	High	[R].QEMSKDLEEVK.[A]	1xCarbamyl [K5]	P02647 1xCarbamyl [K112]	0,0424547	0,000840285	4	P02647	Apolipoprotein A-I OS=Homo sapiens OX=9606 GN=APOA1 PE=1 SV=1	P02647 [108-118]	1	137865187	0								. Found	. Found	. Found	. Found	. Found	. Found	. Found	. Found	. Found	. Found	. Found	. Found	. Found	. Found	. Found	. Found	. Found	. Found	. Found	. Found	.	. Found	. Found	. Found	. Found	. Found	. Found	. Found	. Found
	High	[R].QEMSKDLEEVK.[A]			0,000799099	0	204	P02647	Apolipoprotein A-I OS=Homo sapiens OX=9606 GN=APOA1 PE=1 SV=1	P02647 [108-118]	1	133564606	0	0.985	0.97619640388844	72.56	101.9	98.1	56.94	37.24	.	.	.	.	.	.	.	.	.	.	.	.	.	.	.	.	.	.	.	.	.	.	.	.	.	.	.	.	.
	High	[R].QEMSKDLEEVK.[A]	1xOxidation [M3]		0,00187919	0,000313424	364	P02647	Apolipoprotein A-I OS=Homo sapiens OX=9606 GN=APOA1 PE=1 SV=1	P02647 [108-118]	1	135164097	0	0.964	0.965273814243824	106.83	105.7	94.3	137.46	90.02	.	.	.	.	.	.	.	.	.	.	.	.	.	.	.	.	.	.	.	.	.	.	.	.	.	.	.	.	.
	High	[R].QEMSKDLEEVKAK.[V]	1xOxidation [M3]		0,00412297	0,000313424	223	P02647	Apolipoprotein A-I OS=Homo sapiens OX=9606 GN=APOA1 PE=1 SV=1	P02647 [108-120]	2	155077305	0	0.777	0.67815316424791	58.75	103.3	96.7	146.63	55.26	.	.	.	.	.	.	.	.	.	.	.	.	.	.	.	.	.	.	.	.	.	.	.	.	.	.	.	.	.
	High	[R].QEMSKDLEEVKAK.[V]			0,000136512	0	167	P02647	Apolipoprotein A-I OS=Homo sapiens OX=9606 GN=APOA1 PE=1 SV=1	P02647 [108-120]	2	153477813	0	0.743	0.588661588515081	30.73	118.7	81.3	39.95	28.22	.	.	.	.	.	.	.	.	.	.	.	.	.	.	.	.	.	.	.	.	.	.	.	.	.	.	.	.	.
	High	[R].QGLLPVLESFK.[V]			0,00109396	0	2543	P02647	Apolipoprotein A-I OS=Homo sapiens OX=9606 GN=APOA1 PE=1 SV=1	P02647 [240-250]	0	123070925	0	1.085	0.999850434146449	40.29	94.2	105.8	27.80	27.74	.	.	.	.	.	.	.	.	.	.	.	.	.	.	.	.	.	.	.	.	.	.	.	.	.	.	.	.	.
	High	[R].QGLLPVLESFK.[V]	1xHNE [K11]	P02647 1xHNE [K250]	0,00599347	0,000591694	2	P02647	Apolipoprotein A-I OS=Homo sapiens OX=9606 GN=APOA1 PE=1 SV=1	P02647 [240-250]	0	138682428	0	1.968	0.65258099965314	82.96	74.4	125.6	95.41	63.48	. Found	. Found	. Found	. Found	. Found	. Found	. Found	.	.	. Found	. Found	. Found	. Found	. Found	. Found	. Found	. Found	. Found	. Found	. Found	. Found	. Found	. Found	. Found	. Found	. Found	. Found	. Found	. Found
	High	[R].QGLLPVLESFKVSFLSALEEYTK.[K]			1,69751E-06	0	368	P02647	Apolipoprotein A-I OS=Homo sapiens OX=9606 GN=APOA1 PE=1 SV=1	P02647 [240-262]	1	259840653	0	2.152	0.0893831901138962	143.71	79.5	120.5	155.63	143.22	.	.	.	.	.	.	.	.	.	.	.	.	.	.	.	.	.	.	.	.	. Found	.	.	.	.	.	.	.	.
	High	[R].QGLLPVLESFKVSFLSALEEYTK.[K]	1xHNE [K]	P02647 1xHNE [K]	0,0389339	0,000840285	5	P02647	Apolipoprotein A-I OS=Homo sapiens OX=9606 GN=APOA1 PE=1 SV=1	P02647 [240-262]	1	275452156	0	5.324	0.00850826275591007	136.27	28.2	171.8	143.07	135.09	. Found	. Found	. Found	. Found	. Found	. Found	. Found	. Found	. Found	. Found	. Found	. Found	. Found	. Found	. Found	. Found	. Found	. Found	. Found	. Found	. Found	. Found	. Found	. Found	. Found	. Found	. Found	. Found	. Found
	High	[R].QGLLPVLESFKVSFLSALEEYTKK.[L]	1xCarbamyl [K11]	P02647 1xCarbamyl [K250]	0,0162398	0,000750615	2	P02647	Apolipoprotein A-I OS=Homo sapiens OX=9606 GN=APOA1 PE=1 SV=1	P02647 [240-263]	2	276950731	0								. Found	. Found	. Found	. Found	. Found	. Found	. Found	. Found	. Found	. Found	. Found	. Found	. Found	. Found	. Found	. Found	. Found	. Found	. Found	. Found	. Found	. Found	. Found	. Found	. Found	. Found	. Found	. Found	. Found
	High	[R].QGLLPVLESFKVSFLSALEEYTKK.[L]			5,82127E-07	0	1631	P02647	Apolipoprotein A-I OS=Homo sapiens OX=9606 GN=APOA1 PE=1 SV=1	P02647 [240-263]	2	272650149	0	1.458	0.745559913349073	144.92	85.7	114.3	117.06	105.13	.	.	.	.	.	.	.	.	.	.	.	.	.	.	.	.	.	.	.	.	.	.	.	.	.	.	.	.	.
	High	[R].QKLHELQEK.[L]			0,00903385	0,000750615	938	P02647	Apolipoprotein A-I OS=Homo sapiens OX=9606 GN=APOA1 PE=1 SV=1	P02647 [156-164]	1	115263715	0	0.854	0.848676301269498	44.03	106.4	93.6	39.46	33.22	.	.	.	.	.	.	.	.	.	.	.	.	.	.	.	.	.	.	.	.	.	.	.	.	.	.	.	.	.
	High	[R].QKLHELQEK.[L]	1xCarbamyl [K2]	P02647 1xCarbamyl [K157]	0,177921	0,00643402	1	P02647	Apolipoprotein A-I OS=Homo sapiens OX=9606 GN=APOA1 PE=1 SV=1	P02647 [156-164]	1	119564296	0								. Found	. Found	. Found	. Found	. Found	. Found	. Found	. Found	. Found	. Found	. Found	. Found	. Found	. Found	. Found	. Found	. Found	. Found	. Found	. Found	. Found	. Found	. Found	. Found	. Found	. Found	. Found	. Found	. Found
	High	[R].QKVEPLR.[A]			0,158748	0,00604328	55	P02647	Apolipoprotein A-I OS=Homo sapiens OX=9606 GN=APOA1 PE=1 SV=1	P02647 [141-147]	1	86952033	0	0.935	0.95508712871475	65.50	109.0	91.0	54.93	50.22	. Found	. Found	. Found	.	.	.	. Found	.	.	.	.	.	.	.	.	.	.	.	.	. Found	.	. Found	. Found	. Found	.	. Found	.	.	. Found
	High	[R].QKVEPLRAELQEGAR.[Q]			0,0126837	0,000750615	561	P02647	Apolipoprotein A-I OS=Homo sapiens OX=9606 GN=APOA1 PE=1 SV=1	P02647 [141-155]	2	172394496	2	0.935	0.954877383922748	19.02	101.2	98.8	17.98	14.10	.	.	.	.	.	.	.	.	.	.	.	.	.	.	.	.	.	.	.	.	.	.	.	.	.	.	.	.	.
	High	[R].THLAPYSDELR.[Q]	1xHNE [H2]	P02647 1xHNE [H186]	0,00151176	0	118	P02647	Apolipoprotein A-I OS=Homo sapiens OX=9606 GN=APOA1 PE=1 SV=1	P02647 [185-195]	0	145776347	0	1.093	0.976400251294691	120.02	82.1	117.9	112.29	80.12	. Found	. Found	. Found	. Found	. Found	. Found	. Found	. Found	. Found	.	.	.	.	.	.	.	.	.	.	.	.	.	.	.	.	.	.	.	.
	High	[R].THLAPYSDELR.[Q]			0,00381839	0,000313424	4637	P02647	Apolipoprotein A-I OS=Homo sapiens OX=9606 GN=APOA1 PE=1 SV=1	P02647 [185-195]	0	130164844	0	0.959	0.965103206330036	22.36	102.0	98.0	19.01	17.87	.	.	.	.	.	.	.	.	.	.	.	.	.	.	.	.	.	.	.	.	.	.	.	.	.	.	.	.	.
	High	[R].THLAPYSDELRQR.[L]			0,00150123	0	542	P02647	Apolipoprotein A-I OS=Homo sapiens OX=9606 GN=APOA1 PE=1 SV=1	P02647 [185-197]	1	158580813	0	0.895	0.909863605903733	35.54	98.0	102.0	29.69	33.00	.	.	.	.	.	.	.	.	.	.	.	.	.	.	.	.	.	.	.	.	.	.	.	.	.	.	.	.	.
	High	[R].THLAPYSDELRQR.[L]	1xHNE [H2]	P02647 1xHNE [H186]	0,0503517	0,0010353	12	P02647	Apolipoprotein A-I OS=Homo sapiens OX=9606 GN=APOA1 PE=1 SV=1	P02647 [185-197]	1	174192316	0								. Found	. Found	. Found	. Found	. Found	. Found	. Found	. Found	. Found	. Found	. Found	. Found	.	. Found	.	. Found	. Found	. Found	. Found	. Found	. Found	.	.	.	.	.	. Found	. Found	. Found
	High	[R].THLAPYSDELRQRLAAR.[L]			0,0833081	0,00250817	9	P02647	Apolipoprotein A-I OS=Homo sapiens OX=9606 GN=APOA1 PE=1 SV=1	P02647 [185-201]	2	199706753	0	0.859	0.935524349630532	58.02	120.7	79.3	47.85	64.71	. Found	. Found	. Found	. Found	. Found	.	. Found	. Found	. Found	. Found	. Found	.	. Found	. Found	. Found	. Found	.	. Found	. Found	. Found	. Found	.	. Found	. Found	.	.	.	. Found	. Found
	High	[R].VKDLATVYVDVLK.[D]			7,54134E-05	0	5548	P02647	Apolipoprotein A-I OS=Homo sapiens OX=9606 GN=APOA1 PE=1 SV=1	P02647 [35-47]	1	146285156	0	0.955	0.964369058686853	32.25	100.5	99.5	26.58	23.02	.	.	.	.	.	.	.	.	.	.	.	.	.	.	.	.	.	.	.	.	.	.	.	.	.	.	.	.	.
	High	[R].VKDLATVYVDVLK.[D]	1xCarbamyl [K2]	P02647 1xCarbamyl [K36]	0,00624605	0,000591694	7	P02647	Apolipoprotein A-I OS=Homo sapiens OX=9606 GN=APOA1 PE=1 SV=1	P02647 [35-47]	1	150585737	0	2.278	0.433781808680976	37.44	63.2	136.8	16.39	34.25	. Found	. Found	.	. Found	. Found	. Found	. Found	. Found	. Found	.	. Found	. Found	. Found	. Found	. Found	. Found	.	. Found	. Found	. Found	. Found	. Found	. Found	. Found	. Found	. Found	. Found	. Found	. Found
	High	[R].VKDLATVYVDVLK.[D]	1xHNE [K]	P02647 1xHNE [K]	0,000217657	0	93	P02647	Apolipoprotein A-I OS=Homo sapiens OX=9606 GN=APOA1 PE=1 SV=1	P02647 [35-47]	1	161896659	0	1.411	0.958812300179976	53.69	85.0	115.0	43.46	32.22	.	.	.	.	.	.	.	.	.	.	. Found	.	.	.	.	.	.	.	.	.	.	.	.	.	.	.	.	.	.
	High	[R].VKDLATVYVDVLKDSGR.[D]			5,58652E-07	0	969	P02647	Apolipoprotein A-I OS=Homo sapiens OX=9606 GN=APOA1 PE=1 SV=1	P02647 [35-51]	2	187803310	0	0.979	0.975038780283934	34.30	104.4	95.6	33.80	30.08	.	.	.	.	.	.	.	.	.	.	.	.	.	.	.	.	.	.	.	.	.	.	.	.	.	.	.	.	.
	High	[R].VKDLATVYVDVLKDSGR.[D]	1xCarbamyl [K13]	P02647 1xCarbamyl [K47]	0,0234484	0,000840285	5	P02647	Apolipoprotein A-I OS=Homo sapiens OX=9606 GN=APOA1 PE=1 SV=1	P02647 [35-51]	2	192103892	0	2.672	0.293570290480714	68.33	49.1	150.9	50.85	54.70	. Found	. Found	. Found	. Found	. Found	. Found	. Found	. Found	. Found	. Found	. Found	. Found	. Found	. Found	. Found	. Found	. Found	. Found	. Found	. Found	. Found	. Found	. Found	.	. Found	. Found	. Found	. Found	. Found
High	Master Protein	Q9Y490	Talin-1 OS=Homo sapiens OX=9606 GN=TLN1 PE=1 SV=3	67	126	1967	126	2541	269,6	6,07	1.231	0.3	0.694493	.	.	.	.	.	.	.	.	.	.	.	.	.	.	.	. Found	.	.	.	.	.	.	.	.	.	.	.	.	.	.	.	.	.	.	. Found	.
	Confidence	Annotated Sequence	Modifications	Modifications in Master Proteins	Qvality PEP	Qvality q-value	# PSMs	Master Protein Accessions	Master Protein Descriptions	Positions in Master Proteins	# Missed Cleavages	Theo. MH+ [Da]	# Razor Quan Results	Abundance Ratio: (HDL) / (Control)	Abundance Ratio Adj. P-Value: (HDL) / (Control)	Abundance Ratio Variability [%]: (HDL) / (Control)	Abundances (Grouped): Control	Abundances (Grouped): HDL	Abundances (Grouped) CV [%]: Control	Abundances (Grouped) CV [%]: HDL	Found in Sample: [S2] F2: Sample, C7, Control, Replicate 1	Found in Sample: [S3] F3: Sample, C7, Control, Replicate 2	Found in Sample: [S4] F4: Sample, C7, Control, Replicate 3	Found in Sample: [S5] F5: Sample, C9, Control, Replicate 1	Found in Sample: [S6] F6: Sample, C9, Control, Replicate 2	Found in Sample: [S7] F7: Sample, C9, Control, Replicate 3	Found in Sample: [S8] F8: Sample, C10, Control, Replicate 1	Found in Sample: [S9] F9: Sample, C10, Control, Replicate 2	Found in Sample: [S10] F10: Sample, C10, Control, Replicate 3	Found in Sample: [S20] F20: Sample, C5, Control, Replicate 1	Found in Sample: [S21] F21: Sample, C5, Control, Replicate 2	Found in Sample: [S22] F22: Sample, C5, Control, Replicate 3	Found in Sample: [S23] F23: Sample, C6, Control, Replicate 1	Found in Sample: [S24] F24: Sample, C6, Control, Replicate 2	Found in Sample: [S25] F25: Sample, C6, Control, Replicate 3	Found in Sample: [S26] F26: Sample, C8, Control, Replicate 1	Found in Sample: [S27] F27: Sample, C8, Control, Replicate 2	Found in Sample: [S28] F28: Sample, C8, Control, Replicate 3	Found in Sample: [S38] F38: Sample, C1, Control, Replicate 1	Found in Sample: [S39] F39: Sample, C1, Control, Replicate 2	Found in Sample: [S40] F40: Sample, C1, Control, Replicate 3	Found in Sample: [S41] F41: Sample, C4, Control, Replicate 1	Found in Sample: [S42] F42: Sample, C4, Control, Replicate 2	Found in Sample: [S43] F43: Sample, C4, Control, Replicate 3	Found in Sample: [S11] F11: Sample, H1, HDL, Replicate 1	Found in Sample: [S12] F12: Sample, H1, HDL, Replicate 2	Found in Sample: [S13] F13: Sample, H1, HDL, Replicate 3	Found in Sample: [S14] F14: Sample, H2, HDL, Replicate 1	Found in Sample: [S15] F15: Sample, H2, HDL, Replicate 2
	High	[K].ACEFAGFQCQIQFGPHNEQK.[H]	2xCarbamidomethyl [C2; C9]		8,13247E-05	0	16	Q9Y490	Talin-1 OS=Homo sapiens OX=9606 GN=TLN1 PE=1 SV=3	Q9Y490 [235-254]	0	239605466	0	1.104	0.983912531234671	91.62	70.1	129.9	86.50	52.38	. Found	.	. Found	.	. Found	.	. Found	. Found	. Found	. Found	. Found	. Found	. Found	. Found	. Found	. Found	. Found	. Found	.	. Found	.	. Found	. Found	. Found	. Found	. Found	.	.	.
	High	[K].ADAEGESDLENSR.[K]			0,00247756	0,000313424	5	Q9Y490	Talin-1 OS=Homo sapiens OX=9606 GN=TLN1 PE=1 SV=3	Q9Y490 [842-854]	0	139258736	0	0.774	0.935524349630532	22.45	108.7	91.3		40.55	. Found	. Found	. Found	. Found	. Found	. Found	. Found	. Found	. Found	. Found	. Found	. Found	. Found	. Found	. Found	. Found	. Found	. Found	. Found	.	.	. Found	. Found	. Found	. Found	. Found	. Found	.	.
	High	[K].ADAEGESDLENSRK.[L]			0,000354254	0	14	Q9Y490	Talin-1 OS=Homo sapiens OX=9606 GN=TLN1 PE=1 SV=3	Q9Y490 [842-855]	1	152068232	0	1.195	0.994806865988899	116.12	69.1	130.9	140.24	78.77	. Found	. Found	. Found	. Found	. Found	. Found	.	. Found	. Found	. Found	. Found	. Found	. Found	. Found	. Found	. Found	. Found	. Found	. Found	.	.	. Found	.	.	. Found	. Found	. Found	.	.
	High	[K].AGALQCSPSDAYTK.[K]	1xCarbamidomethyl [C6]		0,00264206	0,000313424	14	Q9Y490	Talin-1 OS=Homo sapiens OX=9606 GN=TLN1 PE=1 SV=3	Q9Y490 [1934-1947]	0	146867367	0	0.911	0.976400251294691	76.26	93.7	106.3	85.62	48.24	. Found	. Found	. Found	.	. Found	.	. Found	. Found	. Found	. Found	. Found	. Found	. Found	. Found	. Found	. Found	. Found	. Found	.	.	.	. Found	. Found	. Found	. Found	. Found	. Found	.	.
	High	[K].AGALQCSPSDAYTKK.[E]	1xCarbamidomethyl [C6]		0,000639111	0	20	Q9Y490	Talin-1 OS=Homo sapiens OX=9606 GN=TLN1 PE=1 SV=3	Q9Y490 [1934-1948]	1	159676863	0	2.574	0.275812855530379	104.92	46.2	153.8	104.94	48.91	. Found	. Found	. Found	.	.	.	.	.	.	. Found	. Found	. Found	. Found	. Found	. Found	. Found	. Found	. Found	.	.	.	. Found	. Found	. Found	. Found	. Found	. Found	.	. Found
	High	[K].AGFLDLK.[D]			0,0281721	0,000840285	10	Q9Y490	Talin-1 OS=Homo sapiens OX=9606 GN=TLN1 PE=1 SV=3	Q9Y490 [257-263]	0	76343487	0	0.945	0.974874541096762	62.86	103.7	96.3	96.03	26.18	. Found	. Found	. Found	. Found	. Found	. Found	. Found	. Found	. Found	. Found	. Found	. Found	. Found	. Found	. Found	. Found	. Found	. Found	.	.	.	.	.	.	. Found	. Found	. Found	. Found	. Found
	High	[K].AGFLDLKDFLPK.[E]			0,00110538	0	37	Q9Y490	Talin-1 OS=Homo sapiens OX=9606 GN=TLN1 PE=1 SV=3	Q9Y490 [257-268]	1	136376201	0	1.654	0.913105079505977	123.19	73.2	126.8	139.10	68.39	. Found	.	.	.	.	.	.	.	.	.	. Found	. Found	. Found	. Found	. Found	. Found	. Found	. Found	.	.	.	.	.	.	.	.	.	.	.
	High	[K].AIAVTVQEMVTK.[S]			0,00407793	0,000313424	19	Q9Y490	Talin-1 OS=Homo sapiens OX=9606 GN=TLN1 PE=1 SV=3	Q9Y490 [1863-1874]	0	128971335	0	1.245	0.999209963067217	124.48	68.6	131.4	175.18	97.94	. Found	. Found	. Found	.	.	.	.	.	.	. Found	. Found	. Found	. Found	. Found	. Found	. Found	. Found	. Found	.	.	.	.	. Found	. Found	. Found	. Found	. Found	.	.
	High	[K].ALCGFTEAAAQAAYLVGVSDPNSQAGQQGLVEPTQFAR.[A]	1xCarbamidomethyl [C3]		2,0907E-05	0	14	Q9Y490	Talin-1 OS=Homo sapiens OX=9606 GN=TLN1 PE=1 SV=3	Q9Y490 [1432-1469]	0	392290284	0	0.674	0.751821550198597	51.12	100.6	99.4	101.40	67.82	. Found	. Found	. Found	. Found	.	. Found	.	. Found	. Found	. Found	. Found	. Found	. Found	. Found	. Found	. Found	. Found	. Found	. Found	.	.	.	.	.	. Found	. Found	. Found	. Found	.
	High	[K].ALDGAFTEENR.[A]			0,0102249	0,000750615	3	Q9Y490	Talin-1 OS=Homo sapiens OX=9606 GN=TLN1 PE=1 SV=3	Q9Y490 [1545-1555]	0	122256986	0								. Found	. Found	. Found	. Found	. Found	. Found	. Found	. Found	. Found	. Found	. Found	. Found	. Found	. Found	. Found	. Found	. Found	. Found	.	.	.	. Found	. Found	. Found	. Found	. Found	. Found	. Found	. Found
	High	[K].ALDYYMLR.[N]			0,0510219	0,0010353	4	Q9Y490	Talin-1 OS=Homo sapiens OX=9606 GN=TLN1 PE=1 SV=3	Q9Y490 [67-74]	0	104451828	0	1.528	0.956084375177942	113.40	70.8	129.2	108.34	72.44	. Found	. Found	. Found	. Found	. Found	. Found	. Found	. Found	.	. Found	. Found	. Found	. Found	. Found	. Found	. Found	. Found	. Found	.	.	.	. Found	. Found	. Found	. Found	. Found	. Found	. Found	. Found
	High	[K].ALGDLISATK.[A]			0,00493816	0,000313424	22	Q9Y490	Talin-1 OS=Homo sapiens OX=9606 GN=TLN1 PE=1 SV=3	Q9Y490 [2090-2099]	0	98856734	0	1.252	0.999850434146449	120.11	96.3	103.7	129.92	82.57	. Found	. Found	. Found	. Found	.	. Found	. Found	. Found	. Found	. Found	. Found	. Found	. Found	. Found	. Found	. Found	. Found	. Found	.	.	.	.	.	.	. Found	. Found	. Found	.	.
	High	[K].ALSTDPAAPNLK.[S]			0,00406303	0,000313424	15	Q9Y490	Talin-1 OS=Homo sapiens OX=9606 GN=TLN1 PE=1 SV=3	Q9Y490 [1321-1332]	0	119764738	0	1.475	0.964369058686853	116.87	93.2	106.8	160.20	76.01	. Found	. Found	. Found	. Found	.	.	. Found	.	. Found	. Found	. Found	. Found	. Found	. Found	. Found	. Found	. Found	. Found	.	.	.	.	.	.	. Found	. Found	. Found	. Found	. Found
	High	[K].APGQLECETAIAALNSCLR.[D]	2xCarbamidomethyl [C7; C17]		0,00227473	0,000313424	2	Q9Y490	Talin-1 OS=Homo sapiens OX=9606 GN=TLN1 PE=1 SV=3	Q9Y490 [1655-1673]	0	207400558	0	0.390	0.240883617619499	2.37	143.9	56.1		29.36	. Found	. Found	. Found	. Found	. Found	. Found	. Found	. Found	. Found	. Found	. Found	. Found	. Found	. Found	. Found	. Found	. Found	. Found	. Found	.	.	. Found	. Found	. Found	. Found	. Found	. Found	. Found	. Found
	High	[K].AQEACGPLEMDSALSVVQNLEK.[D]	1xCarbamidomethyl [C5]		6,99953E-06	0	12	Q9Y490	Talin-1 OS=Homo sapiens OX=9606 GN=TLN1 PE=1 SV=3	Q9Y490 [1041-1062]	0	238913739	0	0.843	0.9500492592737	73.43	133.4	66.6	96.09	77.12	. Found	. Found	. Found	.	. Found	.	.	.	.	. Found	. Found	. Found	. Found	. Found	. Found	. Found	. Found	. Found	. Found	.	.	. Found	. Found	.	. Found	. Found	. Found	.	. Found
	High	[K].AQEACGPLEMDSALSVVQNLEKDLQEVK.[A]	1xCarbamidomethyl [C5]		0,000325141	0	12	Q9Y490	Talin-1 OS=Homo sapiens OX=9606 GN=TLN1 PE=1 SV=3	Q9Y490 [1041-1068]	1	310151294	0	0.875	0.975038780283934	80.38	134.7	65.3	70.23	94.42	. Found	. Found	. Found	.	. Found	.	. Found	.	. Found	. Found	. Found	. Found	. Found	. Found	. Found	. Found	. Found	. Found	. Found	.	.	. Found	. Found	. Found	. Found	. Found	. Found	.	.
	High	[K].AQEACGPLEMDSALSVVQNLEKDLQEVK.[A]	1xCarbamidomethyl [C5]; 1xOxidation [M10]		0,000904614	0	4	Q9Y490	Talin-1 OS=Homo sapiens OX=9606 GN=TLN1 PE=1 SV=3	Q9Y490 [1041-1068]	1	311750786	0	0.491	0.489673604368228	24.38	114.4	85.6	106.89	80.17	. Found	. Found	. Found	. Found	. Found	. Found	. Found	. Found	. Found	. Found	. Found	. Found	. Found	. Found	. Found	. Found	. Found	. Found	. Found	.	.	. Found	.	. Found	. Found	. Found	. Found	. Found	. Found
	High	[K].ASAGPQPLLVQSCK.[A]	1xCarbamidomethyl [C13]		0,000356692	0	20	Q9Y490	Talin-1 OS=Homo sapiens OX=9606 GN=TLN1 PE=1 SV=3	Q9Y490 [944-957]	0	145576242	0	1.165	0.994806865988899	118.69	81.9	118.1	114.91	71.27	. Found	. Found	. Found	.	.	.	.	.	.	. Found	. Found	. Found	. Found	. Found	. Found	. Found	. Found	. Found	.	.	.	. Found	. Found	. Found	. Found	. Found	. Found	.	. Found
	High	[K].ASSLIEEAKK.[A]			0,0275869	0,000840285	4	Q9Y490	Talin-1 OS=Homo sapiens OX=9606 GN=TLN1 PE=1 SV=3	Q9Y490 [1162-1171]	1	107559937	0	0.380	0.00799116747433774	5.37	149.0	51.0		20.40	. Found	. Found	. Found	. Found	. Found	. Found	. Found	. Found	. Found	. Found	. Found	. Found	. Found	. Found	. Found	. Found	. Found	. Found	. Found	.	. Found	. Found	. Found	. Found	. Found	. Found	. Found	. Found	.
	High	[K].ASVPTIQDQASAMQLSQCAK.[N]	1xCarbamidomethyl [C18]		8,65042E-05	0	2	Q9Y490	Talin-1 OS=Homo sapiens OX=9606 GN=TLN1 PE=1 SV=3	Q9Y490 [1006-1025]	0	213402671	0	0.010	1.18764845605701E-16		200.0				. Found	. Found	. Found	. Found	. Found	. Found	. Found	. Found	. Found	. Found	. Found	. Found	. Found	. Found	. Found	. Found	. Found	. Found	. Found	.	.	. Found	. Found	. Found	. Found	. Found	. Found	. Found	. Found
	High	[K].AVAEQIPLLVQGVR.[G]			0,00103146	0	46	Q9Y490	Talin-1 OS=Homo sapiens OX=9606 GN=TLN1 PE=1 SV=3	Q9Y490 [958-971]	0	149288459	0	1.838	0.730046660883183	120.18	58.6	141.4	129.38	53.48	.	.	.	.	.	.	.	.	.	. Found	. Found	. Found	. Found	. Found	. Found	. Found	. Found	. Found	.	.	.	.	.	.	.	.	.	.	.
	High	[K].AVASAAAALVLK.[A]			0,00292109	0,000313424	51	Q9Y490	Talin-1 OS=Homo sapiens OX=9606 GN=TLN1 PE=1 SV=3	Q9Y490 [674-685]	0	108467247	0	1.846	0.460829401402393	85.00	64.3	135.7	87.43	48.33	.	.	.	.	.	.	.	.	.	.	.	.	.	.	.	. Found	.	.	.	.	.	.	. Found	.	.	.	. Found	.	.
	High	[K].AVEGCVSASQAATEDGQLLR.[G]	1xCarbamidomethyl [C5]		2,88881E-06	0	38	Q9Y490	Talin-1 OS=Homo sapiens OX=9606 GN=TLN1 PE=1 SV=3	Q9Y490 [746-765]	0	206198696	0	1.266	0.999209963067217	118.79	90.5	109.5	119.50	81.24	. Found	.	.	.	.	.	.	.	.	. Found	. Found	. Found	. Found	. Found	. Found	. Found	. Found	. Found	.	.	.	. Found	. Found	.	.	.	.	.	.
	High	[K].AVSSAIAQLLGEVAQGNENYAGIAAR.[D]			2,66052E-06	0	62	Q9Y490	Talin-1 OS=Homo sapiens OX=9606 GN=TLN1 PE=1 SV=3	Q9Y490 [1097-1122]	0	257333180	0	1.137	0.986515106621293	118.80	98.0	102.0	105.82	84.11	.	.	.	.	.	.	.	.	.	.	.	. Found	. Found	. Found	.	. Found	. Found	. Found	.	.	.	.	.	.	. Found	.	.	.	. Found
	High	[K].CTQDLGNSTK.[A]	1xCarbamidomethyl [C1]		0,00344877	0,000313424	3	Q9Y490	Talin-1 OS=Homo sapiens OX=9606 GN=TLN1 PE=1 SV=3	Q9Y490 [1087-1096]	0	112350481	0	1.115	0.994806865988899	102.77	79.5	120.5	85.31	83.56	. Found	. Found	. Found	. Found	. Found	. Found	. Found	.	.	. Found	. Found	. Found	. Found	. Found	. Found	. Found	. Found	. Found	. Found	. Found	. Found	. Found	. Found	. Found	. Found	. Found	. Found	. Found	. Found
	High	[K].EAAYHPEVAPDVR.[L]			0,00229911	0,000313424	36	Q9Y490	Talin-1 OS=Homo sapiens OX=9606 GN=TLN1 PE=1 SV=3	Q9Y490 [2221-2233]	0	145370702	0	1.433	0.964810501085697	115.75	60.0	140.0	157.21	39.17	. Found	. Found	. Found	.	.	.	.	.	.	. Found	. Found	. Found	. Found	. Found	. Found	. Found	. Found	. Found	.	.	.	.	.	. Found	. Found	. Found	. Found	.	.
	High	[K].ECDNALRELETVR.[E]	1xCarbamidomethyl [C2]		0,0128858	0,000750615	11	Q9Y490	Talin-1 OS=Homo sapiens OX=9606 GN=TLN1 PE=1 SV=3	Q9Y490 [1362-1374]	1	160476969	0	1.215	0.995459652161687	96.88	83.9	116.1	101.71	53.47	. Found	. Found	. Found	. Found	. Found	. Found	. Found	. Found	. Found	. Found	. Found	. Found	. Found	. Found	. Found	. Found	. Found	. Found	.	.	.	. Found	. Found	. Found	. Found	. Found	. Found	. Found	. Found
	High	[K].EVIQEWNLTNIKR.[W]			0,00335024	0,000313424	13	Q9Y490	Talin-1 OS=Homo sapiens OX=9606 GN=TLN1 PE=1 SV=3	Q9Y490 [346-358]	1	164289113	0	0.881	0.97619640388844	76.94	85.8	114.2	94.13	55.88	. Found	. Found	. Found	.	.	.	. Found	. Found	. Found	. Found	. Found	. Found	. Found	. Found	. Found	. Found	. Found	. Found	.	. Found	.	. Found	. Found	. Found	. Found	. Found	. Found	.	.
	High	[K].FFYSDQNVDSRDPVQLNLLYVQAR.[D]			0,000344664	0	6	Q9Y490	Talin-1 OS=Homo sapiens OX=9606 GN=TLN1 PE=1 SV=3	Q9Y490 [197-220]	1	288743733	0	1.809	0.791791336826113	51.78	69.6	130.4	60.84	33.22	. Found	. Found	. Found	. Found	.	.	.	. Found	. Found	. Found	. Found	. Found	. Found	. Found	. Found	. Found	. Found	. Found	.	.	. Found	. Found	. Found	. Found	. Found	. Found	. Found	. Found	. Found
	High	[K].FLPSELRDEH.[-]			0,0163711	0,000750615	21	Q9Y490	Talin-1 OS=Homo sapiens OX=9606 GN=TLN1 PE=1 SV=3	Q9Y490 [2532-2541]	1	124261133	0	1.779	0.845458819193718	121.40	68.3	131.7	142.04	76.88	. Found	.	. Found	.	.	.	.	.	.	. Found	. Found	. Found	. Found	. Found	. Found	. Found	. Found	. Found	.	.	.	. Found	. Found	. Found	. Found	. Found	. Found	.	.
	High	[K].GITMATAK.[A]			0,242294	0,00929554	26	Q9Y490	Talin-1 OS=Homo sapiens OX=9606 GN=TLN1 PE=1 SV=3	Q9Y490 [2181-2188]	0	79242840	0	1.141	0.999209963067217	124.70	81.8	118.2	182.24	74.48	. Found	. Found	. Found	.	.	.	.	.	.	. Found	. Found	. Found	. Found	. Found	. Found	. Found	. Found	. Found	.	.	.	.	.	. Found	. Found	. Found	. Found	.	.
	High	[K].GLAGAVSELLR.[S]			0,00518201	0,000313424	27	Q9Y490	Talin-1 OS=Homo sapiens OX=9606 GN=TLN1 PE=1 SV=3	Q9Y490 [614-624]	0	108563133	0	0.818	0.705881928729157	76.10	114.0	86.0	74.54	84.61	. Found	. Found	.	.	.	.	.	.	.	. Found	. Found	. Found	. Found	. Found	. Found	. Found	. Found	. Found	.	.	.	. Found	.	. Found	. Found	.	.	.	.
	High	[K].GTEWVDPEDPTVIAENELLGAAAAIEAAAK.[K]			0,000406353	0	11	Q9Y490	Talin-1 OS=Homo sapiens OX=9606 GN=TLN1 PE=1 SV=3	Q9Y490 [2292-2321]	0	305151570	0	2.054	0.548256352342301	120.28	56.8	143.2	107.46	113.16	. Found	. Found	. Found	.	. Found	. Found	. Found	.	.	. Found	. Found	. Found	. Found	. Found	. Found	. Found	. Found	. Found	.	.	. Found	. Found	. Found	. Found	. Found	.	. Found	. Found	. Found
	High	[K].ILADATAK.[M]			0,156583	0,0055468	3	Q9Y490	Talin-1 OS=Homo sapiens OX=9606 GN=TLN1 PE=1 SV=3	Q9Y490 [862-869]	0	80246689	0	1.482	0.963035294423709	120.40	77.9	122.1	147.54	33.00	. Found	. Found	. Found	. Found	. Found	. Found	. Found	. Found	. Found	. Found	. Found	. Found	. Found	. Found	. Found	. Found	. Found	. Found	.	.	.	. Found	. Found	. Found	. Found	. Found	. Found	. Found	. Found
	High	[K].ISIGNVVK.[T]			0,0424547	0,000840285	7	Q9Y490	Talin-1 OS=Homo sapiens OX=9606 GN=TLN1 PE=1 SV=3	Q9Y490 [8-15]	0	82951418	0	0.899	0.796237993326362	89.96	104.7	95.3	117.21	64.78	. Found	. Found	. Found	.	.	.	. Found	. Found	. Found	. Found	. Found	. Found	. Found	. Found	. Found	. Found	. Found	. Found	.	. Found	. Found	. Found	. Found	. Found	. Found	. Found	.	. Found	.
	High	[K].KGIWLEAGK.[A]			0,00175766	0	12	Q9Y490	Talin-1 OS=Homo sapiens OX=9606 GN=TLN1 PE=1 SV=3	Q9Y490 [58-66]	1	100157784	1	1.005	0.983306306909598	39.01	103.7	96.3	26.14	24.08	. Found	. Found	. Found	. Found	. Found	. Found	. Found	. Found	. Found	. Found	. Found	. Found	. Found	. Found	. Found	. Found	. Found	. Found	.	.	.	. Found	. Found	. Found	. Found	. Found	. Found	.	.
	High	[K].KLEQLKPR.[A]			0,0196481	0,000840285	25	Q9Y490	Talin-1 OS=Homo sapiens OX=9606 GN=TLN1 PE=1 SV=3	Q9Y490 [2322-2329]	1	101163094	0	0.895	0.834179884945177	101.28	113.6	86.4	80.92	97.54	. Found	. Found	. Found	. Found	.	. Found	.	.	.	. Found	. Found	. Found	. Found	. Found	. Found	. Found	. Found	. Found	. Found	.	. Found	.	.	.	. Found	. Found	. Found	. Found	.
	High	[K].LAQAAQSSVATITR.[L]			0,000107372	0	61	Q9Y490	Talin-1 OS=Homo sapiens OX=9606 GN=TLN1 PE=1 SV=3	Q9Y490 [2044-2057]	0	141678052	0	1.585	0.909586583765699	104.32	71.7	128.3	174.63	54.32	.	.	.	.	.	.	.	.	.	.	.	.	. Found	. Found	. Found	. Found	. Found	. Found	.	.	.	.	.	.	.	.	.	.	.
	High	[K].LGAASLGAEDPETQVVLINAVK.[D]			2,86906E-06	0	21	Q9Y490	Talin-1 OS=Homo sapiens OX=9606 GN=TLN1 PE=1 SV=3	Q9Y490 [2064-2085]	0	219519179	0	0.996	0.909863605903733	106.39	102.5	97.5	129.71	49.75	. Found	. Found	. Found	.	.	.	. Found	. Found	. Found	. Found	. Found	. Found	. Found	. Found	. Found	. Found	. Found	. Found	.	.	.	.	. Found	.	. Found	. Found	. Found	.	.
	High	[K].LHTDDELNWLDHGR.[T]			0,0156003	0,000750615	9	Q9Y490	Talin-1 OS=Homo sapiens OX=9606 GN=TLN1 PE=1 SV=3	Q9Y490 [165-178]	0	172080377	0	1.405	0.927888202177318	81.99	79.3	120.7	90.78	38.69	. Found	. Found	. Found	. Found	.	. Found	. Found	.	. Found	. Found	. Found	. Found	. Found	. Found	. Found	. Found	. Found	. Found	.	.	.	. Found	. Found	. Found	. Found	. Found	. Found	.	.
	High	[K].LKPLPGETMEK.[C]			0,0152907	0,000750615	19	Q9Y490	Talin-1 OS=Homo sapiens OX=9606 GN=TLN1 PE=1 SV=3	Q9Y490 [1076-1086]	0	124267624	0	1.349	0.994806865988899	127.98	90.6	109.4	166.62	69.62	. Found	. Found	. Found	.	.	. Found	.	.	.	. Found	. Found	. Found	. Found	. Found	. Found	. Found	. Found	. Found	.	.	.	. Found	. Found	. Found	. Found	. Found	. Found	.	. Found
	High	[K].LLAALLEDEGGSGRPLLQAAK.[G]			9,14676E-06	0	25	Q9Y490	Talin-1 OS=Homo sapiens OX=9606 GN=TLN1 PE=1 SV=3	Q9Y490 [593-613]	0	212218664	0	1.513	0.938162271599072	88.10	75.0	125.0	92.22	53.06	. Found	. Found	. Found	.	. Found	.	.	.	. Found	. Found	. Found	. Found	. Found	. Found	. Found	. Found	. Found	. Found	.	.	.	. Found	. Found	. Found	. Found	. Found	. Found	. Found	.
	High	[K].MVGGIAQIIAAQEEMLR.[K]			0,00159881	0	3	Q9Y490	Talin-1 OS=Homo sapiens OX=9606 GN=TLN1 PE=1 SV=3	Q9Y490 [2494-2510]	0	182996120	0	0.485	0.465813967894125	9.79	134.3	65.7	39.65		. Found	. Found	. Found	. Found	. Found	. Found	. Found	.	. Found	. Found	. Found	. Found	. Found	. Found	. Found	. Found	. Found	. Found	. Found	. Found	. Found	. Found	. Found	. Found	. Found	. Found	. Found	. Found	.
	High	[K].MVGGIAQIIAAQEEMLRK.[E]	1xOxidation [M1]		0,0774329	0,00176323	1	Q9Y490	Talin-1 OS=Homo sapiens OX=9606 GN=TLN1 PE=1 SV=3	Q9Y490 [2494-2511]	1	197405108	0	0.666	0.832614190997697	20.81	120.1	79.9			. Found	. Found	. Found	. Found	. Found	. Found	. Found	. Found	. Found	. Found	. Found	. Found	. Found	. Found	. Found	. Found	. Found	. Found	. Found	. Found	. Found	. Found	. Found	. Found	. Found	. Found	. Found	. Found	.
	High	[K].NCGQMSEIEAK.[V]	1xCarbamidomethyl [C2]		0,00187919	0,000313424	25	Q9Y490	Talin-1 OS=Homo sapiens OX=9606 GN=TLN1 PE=1 SV=3	Q9Y490 [285-295]	0	126654530	0	0.570	0.53937439522854	33.93	119.1	80.9	102.65	57.75	. Found	.	. Found	.	.	.	.	.	.	. Found	. Found	. Found	. Found	. Found	. Found	. Found	. Found	. Found	.	.	. Found	. Found	. Found	. Found	.	.	.	.	.
	High	[K].NGNLPEFGDAISTASK.[A]			0,000645728	0	8	Q9Y490	Talin-1 OS=Homo sapiens OX=9606 GN=TLN1 PE=1 SV=3	Q9Y490 [1416-1431]	0	162078639	0	0.375	0.0315600392598788	13.82	128.0	72.0	109.75	47.70	. Found	. Found	. Found	. Found	. Found	. Found	. Found	. Found	. Found	. Found	. Found	. Found	. Found	. Found	. Found	. Found	. Found	. Found	. Found	.	.	.	. Found	. Found	. Found	. Found	. Found	. Found	.
	High	[K].NLGTALAELR.[T]			0,00754596	0,000591694	36	Q9Y490	Talin-1 OS=Homo sapiens OX=9606 GN=TLN1 PE=1 SV=3	Q9Y490 [1026-1035]	0	105760003	0	1.506	0.955257224075308	124.35	64.2	135.8	151.46	79.57	.	. Found	.	.	.	.	.	.	.	.	.	.	. Found	. Found	. Found	. Found	. Found	. Found	.	.	.	.	.	.	. Found	.	.	.	.
	High	[K].QAAASATQTIAAAQHAASTPK.[A]			4,34507E-06	0	10	Q9Y490	Talin-1 OS=Homo sapiens OX=9606 GN=TLN1 PE=1 SV=3	Q9Y490 [923-943]	0	199502539	0	1.376	0.97655192231143	66.02	88.7	111.3	132.07	54.40	. Found	.	. Found	.	.	.	.	.	.	. Found	. Found	. Found	. Found	. Found	. Found	. Found	. Found	. Found	. Found	.	.	. Found	. Found	. Found	. Found	. Found	. Found	. Found	. Found
	High	[K].QVAASTAQLLVACK.[V]	1xCarbamidomethyl [C13]		0,000403575	0	23	Q9Y490	Talin-1 OS=Homo sapiens OX=9606 GN=TLN1 PE=1 SV=3	Q9Y490 [2430-2443]	0	145979372	0	0.891	0.841182491859467	73.48	93.6	106.4	85.69	44.42	.	.	. Found	. Found	.	.	.	.	. Found	. Found	. Found	. Found	. Found	. Found	. Found	. Found	. Found	. Found	.	.	.	.	. Found	. Found	. Found	. Found	. Found	.	.
	High	[K].RQFVQSAK.[E]			0,0150478	0,000750615	4	Q9Y490	Talin-1 OS=Homo sapiens OX=9606 GN=TLN1 PE=1 SV=3	Q9Y490 [1523-1530]	1	96353704	0	0.669	0.821202378064323	52.07	124.4	75.6	23.00	92.53	. Found	. Found	. Found	.	. Found	. Found	. Found	. Found	.	. Found	. Found	. Found	. Found	. Found	. Found	. Found	. Found	. Found	. Found	. Found	. Found	. Found	. Found	. Found	. Found	. Found	. Found	. Found	.
	High	[K].RVAGSVTELIQAAEAMK.[G]			0,00169105	0	4	Q9Y490	Talin-1 OS=Homo sapiens OX=9606 GN=TLN1 PE=1 SV=3	Q9Y490 [2275-2291]	1	177395274	0	1.362	0.959472574638865	80.51	85.2	114.8	61.72	47.62	. Found	. Found	. Found	. Found	. Found	. Found	. Found	.	.	. Found	. Found	. Found	. Found	. Found	. Found	. Found	. Found	. Found	. Found	.	. Found	. Found	. Found	. Found	. Found	. Found	. Found	. Found	.
	High	[K].SKDHFGLEGDEESTMLEDSVSPK.[K]			0,00166749	0	10	Q9Y490	Talin-1 OS=Homo sapiens OX=9606 GN=TLN1 PE=1 SV=3	Q9Y490 [405-427]	1	253713480	0	1.185	0.996290224812264	107.18	59.9	140.1	104.93	46.63	. Found	. Found	. Found	.	.	.	. Found	. Found	. Found	. Found	. Found	. Found	. Found	. Found	. Found	. Found	. Found	. Found	. Found	.	.	. Found	. Found	. Found	. Found	. Found	. Found	. Found	. Found
	High	[K].SNTSPEELGPLANQLTSDYGR.[L]			2,40641E-05	0	33	Q9Y490	Talin-1 OS=Homo sapiens OX=9606 GN=TLN1 PE=1 SV=3	Q9Y490 [1875-1895]	0	224906804	0	1.200	0.999850434146449	117.83	64.9	135.1	132.61	69.20	. Found	. Found	. Found	.	.	.	. Found	. Found	.	. Found	. Found	. Found	. Found	. Found	. Found	. Found	. Found	. Found	.	.	.	.	. Found	.	. Found	. Found	. Found	.	.
	High	[K].SQLAAAAR.[A]			0,128483	0,00437431	5	Q9Y490	Talin-1 OS=Homo sapiens OX=9606 GN=TLN1 PE=1 SV=3	Q9Y490 [1333-1340]	0	78744208	0	2.160	0.404984814884543	109.92	64.6	135.4	133.70	65.20	. Found	. Found	. Found	. Found	.	.	. Found	. Found	. Found	. Found	. Found	. Found	. Found	. Found	. Found	. Found	. Found	. Found	. Found	. Found	.	. Found	. Found	. Found	. Found	. Found	. Found	. Found	.
	High	[K].TIMVDDSK.[T]			0,076034	0,00176323	3	Q9Y490	Talin-1 OS=Homo sapiens OX=9606 GN=TLN1 PE=1 SV=3	Q9Y490 [99-106]	0	90843936	0	0.969	0.977134742088879	89.25	89.5	110.5	127.73	46.34	. Found	. Found	. Found	. Found	. Found	. Found	. Found	. Found	. Found	. Found	. Found	. Found	. Found	. Found	. Found	. Found	. Found	. Found	.	. Found	.	. Found	. Found	. Found	. Found	. Found	. Found	. Found	. Found
	High	[K].TIMVDDSKTVTDMLMTICAR.[I]	1xCarbamidomethyl [C18]		0,0430118	0,000840285	1	Q9Y490	Talin-1 OS=Homo sapiens OX=9606 GN=TLN1 PE=1 SV=3	Q9Y490 [99-118]	1	230109572	0								. Found	. Found	. Found	. Found	. Found	. Found	.	. Found	. Found	. Found	. Found	. Found	. Found	. Found	. Found	. Found	. Found	. Found	. Found	. Found	. Found	. Found	. Found	. Found	. Found	. Found	. Found	. Found	. Found
	High	[K].TKEVIQEWNLTNIK.[R]			0,00655926	0,000591694	11	Q9Y490	Talin-1 OS=Homo sapiens OX=9606 GN=TLN1 PE=1 SV=3	Q9Y490 [344-357]	1	171593266	0	0.588	0.481533472513564	31.20	135.4	64.6	88.03	61.15	. Found	. Found	. Found	.	. Found	.	. Found	. Found	. Found	. Found	. Found	. Found	. Found	. Found	. Found	. Found	. Found	. Found	.	.	.	. Found	. Found	. Found	.	. Found	. Found	.	.
	High	[K].TKEVIQEWNLTNIKR.[W]			0,0085603	0,000750615	3	Q9Y490	Talin-1 OS=Homo sapiens OX=9606 GN=TLN1 PE=1 SV=3	Q9Y490 [344-358]	2	187203377	0	0.939	0.97619640388844	51.07	115.0	85.0	51.22	27.32	. Found	. Found	. Found	.	. Found	.	. Found	. Found	. Found	. Found	. Found	. Found	. Found	. Found	. Found	. Found	. Found	. Found	.	. Found	. Found	. Found	. Found	. Found	. Found	. Found	. Found	. Found	. Found
	High	[K].TLAESALQLLYTAK.[E]			0,000136512	0	63	Q9Y490	Talin-1 OS=Homo sapiens OX=9606 GN=TLN1 PE=1 SV=3	Q9Y490 [1767-1780]	0	152185229	0	1.444	0.96595180243873	123.84	83.1	116.9	135.42	87.55	.	.	.	.	.	.	.	.	.	. Found	.	.	. Found	. Found	. Found	. Found	. Found	. Found	.	.	.	.	.	.	.	.	.	.	.
	High	[K].TMLESAGGLIQTAR.[A]			0,000939604	0	5	Q9Y490	Talin-1 OS=Homo sapiens OX=9606 GN=TLN1 PE=1 SV=3	Q9Y490 [1605-1618]	0	144775734	0	0.393	0.00733217131520158	17.79	105.6	94.4	112.69	45.36	. Found	. Found	. Found	. Found	. Found	. Found	. Found	. Found	. Found	. Found	. Found	. Found	. Found	. Found	. Found	. Found	. Found	. Found	.	.	. Found	. Found	. Found	. Found	. Found	. Found	. Found	. Found	. Found
	High	[K].TMLESAGGLIQTAR.[A]	1xOxidation [M2]		0,00353749	0,000313424	1	Q9Y490	Talin-1 OS=Homo sapiens OX=9606 GN=TLN1 PE=1 SV=3	Q9Y490 [1605-1618]	0	146375225	0	0.010	1.18764845605701E-16		200.0				. Found	. Found	. Found	. Found	. Found	. Found	. Found	. Found	. Found	. Found	. Found	. Found	. Found	. Found	. Found	. Found	. Found	. Found	.	. Found	. Found	. Found	. Found	. Found	. Found	. Found	. Found	. Found	. Found
	High	[K].TMQFEPSTMVYDACR.[I]	1xCarbamidomethyl [C14]		0,00760362	0,000750615	1	Q9Y490	Talin-1 OS=Homo sapiens OX=9606 GN=TLN1 PE=1 SV=3	Q9Y490 [16-30]	0	183577610	0	0.010	1.18764845605701E-16		200.0		32.09		. Found	. Found	. Found	. Found	. Found	. Found	. Found	. Found	. Found	. Found	. Found	. Found	. Found	. Found	. Found	. Found	. Found	. Found	.	. Found	. Found	. Found	. Found	. Found	. Found	. Found	. Found	. Found	. Found
	High	[K].TMQFEPSTMVYDACR.[I]	1xCarbamidomethyl [C14]; 1xOxidation [M9]		0,244432	0,00962317	1	Q9Y490	Talin-1 OS=Homo sapiens OX=9606 GN=TLN1 PE=1 SV=3	Q9Y490 [16-30]	0	185177102	0								. Found	. Found	. Found	. Found	. Found	. Found	. Found	. Found	. Found	. Found	. Found	. Found	. Found	. Found	. Found	. Found	. Found	. Found	. Found	.	. Found	. Found	. Found	. Found	. Found	. Found	. Found	. Found	. Found
	High	[K].TSTPEDFIR.[M]			0,0127339	0,000750615	28	Q9Y490	Talin-1 OS=Homo sapiens OX=9606 GN=TLN1 PE=1 SV=3	Q9Y490 [2169-2177]	0	106552111	0	1.426	0.97619640388844	119.66	83.6	116.4	133.30	70.48	. Found	. Found	.	.	. Found	.	.	.	.	.	. Found	. Found	. Found	. Found	. Found	. Found	. Found	. Found	.	.	.	.	.	.	.	. Found	. Found	.	.
	High	[K].TVTDMLMTICAR.[I]	1xCarbamidomethyl [C10]		0,0189401	0,000840285	3	Q9Y490	Talin-1 OS=Homo sapiens OX=9606 GN=TLN1 PE=1 SV=3	Q9Y490 [107-118]	0	141167420	0	0.901	0.977134742088879	86.28	106.3	93.7	104.01	60.71	. Found	. Found	. Found	. Found	. Found	. Found	. Found	. Found	. Found	. Found	. Found	. Found	. Found	. Found	. Found	. Found	. Found	. Found	.	. Found	. Found	. Found	. Found	. Found	. Found	. Found	. Found	. Found	. Found
	High	[K].VGAIPANALDDGQWSQGLISAAR.[M]			3,81406E-06	0	18	Q9Y490	Talin-1 OS=Homo sapiens OX=9606 GN=TLN1 PE=1 SV=3	Q9Y490 [2376-2398]	0	231018368	0	0.493	0.0473161950735102	30.19	103.3	96.7	108.41	83.77	. Found	. Found	. Found	. Found	.	.	. Found	. Found	.	. Found	. Found	. Found	. Found	. Found	. Found	. Found	. Found	. Found	.	.	.	. Found	.	. Found	. Found	. Found	. Found	.	.
	High	[K].VGDDPAVWQLK.[N]			0,00162706	0	6	Q9Y490	Talin-1 OS=Homo sapiens OX=9606 GN=TLN1 PE=1 SV=3	Q9Y490 [2105-2115]	0	122763681	0	1.625	0.871264527092259	127.33	45.2	154.8	151.37	72.24	. Found	. Found	. Found	. Found	. Found	. Found	. Found	. Found	. Found	. Found	. Found	. Found	. Found	. Found	. Found	. Found	. Found	. Found	.	.	.	. Found	. Found	. Found	. Found	. Found	. Found	. Found	. Found
	High	[K].VLGEAMTGISQNAK.[N]			0,000576581	0	4	Q9Y490	Talin-1 OS=Homo sapiens OX=9606 GN=TLN1 PE=1 SV=3	Q9Y490 [1402-1415]	0	141873079	0	0.321	0.0010139383668165	6.18	112.5	87.5	107.25		. Found	. Found	. Found	. Found	. Found	. Found	. Found	. Found	. Found	. Found	. Found	. Found	. Found	. Found	. Found	. Found	. Found	. Found	.	.	.	.	. Found	. Found	. Found	. Found	. Found	. Found	. Found
	High	[K].VLVQNAAGSQEK.[L]			0,00373581	0,000313424	10	Q9Y490	Talin-1 OS=Homo sapiens OX=9606 GN=TLN1 PE=1 SV=3	Q9Y490 [2032-2043]	0	124366409	0	1.005	0.949211453145072	310.66	30.8	169.2	164.77	25.90	. Found	. Found	. Found	. Found	. Found	. Found	.	. Found	.	. Found	. Found	. Found	. Found	. Found	. Found	. Found	. Found	. Found	.	.	.	. Found	. Found	. Found	. Found	. Found	. Found	. Found	. Found
	High	[K].VMVTNVTSLLK.[T]			0,00206713	0,000313424	37	Q9Y490	Talin-1 OS=Homo sapiens OX=9606 GN=TLN1 PE=1 SV=3	Q9Y490 [2120-2130]	0	120469697	1	1.169	0.995459652161687	116.57	95.9	104.1	123.76	82.54	.	.	. Found	.	.	.	.	.	.	.	.	.	. Found	. Found	. Found	. Found	. Found	. Found	.	.	.	.	.	.	.	.	.	.	.
	High	[K].VSHVLAALQAGNR.[G]			0,0157892	0,000750615	11	Q9Y490	Talin-1 OS=Homo sapiens OX=9606 GN=TLN1 PE=1 SV=3	Q9Y490 [1961-1973]	0	133574916	0	1.580	0.909863605903733	126.31	72.4	127.6	144.60	68.59	. Found	. Found	. Found	. Found	. Found	. Found	. Found	. Found	. Found	. Found	. Found	. Found	. Found	. Found	. Found	. Found	. Found	. Found	.	.	.	. Found	. Found	. Found	. Found	. Found	. Found	.	. Found
	High	[K].VSQMAQYFEPLTLAAVGAASK.[T]	1xOxidation [M4]		0,000127461	0	4	Q9Y490	Talin-1 OS=Homo sapiens OX=9606 GN=TLN1 PE=1 SV=3	Q9Y490 [1731-1751]	0	219811618	0	0.686	0.771493750704738	48.01	111.2	88.8	66.07	96.25	. Found	. Found	. Found	. Found	. Found	. Found	. Found	. Found	. Found	. Found	. Found	. Found	. Found	. Found	. Found	. Found	. Found	. Found	. Found	.	.	. Found	. Found	. Found	. Found	. Found	. Found	. Found	. Found
	High	[K].VSQMAQYFEPLTLAAVGAASK.[T]			1,37577E-05	0	3	Q9Y490	Talin-1 OS=Homo sapiens OX=9606 GN=TLN1 PE=1 SV=3	Q9Y490 [1731-1751]	0	218212127	0	0.925	0.872388239863435	89.63	83.5	116.5	107.98	65.22	. Found	. Found	. Found	. Found	. Found	. Found	. Found	. Found	. Found	. Found	. Found	. Found	. Found	. Found	. Found	. Found	. Found	. Found	.	. Found	.	. Found	. Found	. Found	. Found	. Found	. Found	.	. Found
	High	[K].VVAPTISSPVCQEQLVEAGR.[L]	1xCarbamidomethyl [C11]		1,67861E-05	0	33	Q9Y490	Talin-1 OS=Homo sapiens OX=9606 GN=TLN1 PE=1 SV=3	Q9Y490 [722-741]	0	214010668	0	2.016	0.503227123681939	115.94	66.3	133.7	128.21	75.30	. Found	. Found	. Found	. Found	. Found	. Found	. Found	.	.	.	. Found	.	. Found	. Found	. Found	. Found	. Found	. Found	.	.	.	.	.	.	. Found	. Found	. Found	.	.
	High	[R].AAMEPIVISAK.[T]			0,0133533	0,000750615	1	Q9Y490	Talin-1 OS=Homo sapiens OX=9606 GN=TLN1 PE=1 SV=3	Q9Y490 [1594-1604]	0	112962856	0	1.196	0.998019339144021	116.93	88.9	111.1	120.62	71.84	. Found	. Found	. Found	. Found	. Found	. Found	. Found	. Found	. Found	. Found	. Found	. Found	. Found	. Found	. Found	. Found	. Found	. Found	.	. Found	. Found	. Found	. Found	. Found	. Found	. Found	. Found	. Found	. Found
	High	[R].AAMEPIVISAK.[T]	1xOxidation [M3]		0,0336523	0,000840285	1	Q9Y490	Talin-1 OS=Homo sapiens OX=9606 GN=TLN1 PE=1 SV=3	Q9Y490 [1594-1604]	0	114562347	0	0.010	1.18764845605701E-16		200.0				. Found	. Found	. Found	. Found	. Found	. Found	. Found	. Found	. Found	. Found	. Found	. Found	. Found	. Found	. Found	. Found	. Found	. Found	.	. Found	. Found	. Found	. Found	. Found	. Found	. Found	. Found	. Found	. Found
	High	[R].AATAPLLEAVDNLSAFASNPEFSSIPAQISPEGR.[A]			0,00023152	0	26	Q9Y490	Talin-1 OS=Homo sapiens OX=9606 GN=TLN1 PE=1 SV=3	Q9Y490 [1560-1593]	0	347074380	0	1.395	0.966092194561975	75.48	83.2	116.8	75.89	64.09	. Found	. Found	. Found	. Found	.	.	. Found	.	. Found	. Found	. Found	. Found	. Found	. Found	. Found	. Found	. Found	. Found	.	.	.	. Found	.	.	. Found	. Found	. Found	.	.
	High	[R].AIADMLR.[A]			0,0792202	0,00176323	20	Q9Y490	Talin-1 OS=Homo sapiens OX=9606 GN=TLN1 PE=1 SV=3	Q9Y490 [2211-2217]	0	78942874	0	1.394	0.965273814243824	122.26	64.9	135.1	132.69	69.16	. Found	.	.	.	.	.	.	.	.	. Found	. Found	. Found	. Found	. Found	. Found	. Found	. Found	. Found	. Found	.	.	. Found	. Found	. Found	. Found	. Found	. Found	.	.
	High	[R].ALEATTEHIR.[Q]			0,00575174	0,000313424	12	Q9Y490	Talin-1 OS=Homo sapiens OX=9606 GN=TLN1 PE=1 SV=3	Q9Y490 [2145-2154]	0	114060076	0	1.585	0.935265917767569	91.35	64.6	135.4	196.62	66.58	. Found	. Found	. Found	. Found	. Found	. Found	. Found	. Found	. Found	. Found	. Found	. Found	. Found	. Found	. Found	. Found	. Found	. Found	.	.	.	. Found	.	. Found	. Found	. Found	. Found	. Found	. Found
	High	[R].ALEATTEHIRQELAVFCSPEPPAK.[T]	1xCarbamidomethyl [C17]		2,92873E-06	0	14	Q9Y490	Talin-1 OS=Homo sapiens OX=9606 GN=TLN1 PE=1 SV=3	Q9Y490 [2145-2168]	1	269435558	0	1.883	0.642017902290515	105.39	52.7	147.3	100.62	61.05	. Found	. Found	. Found	.	.	. Found	. Found	. Found	.	. Found	. Found	. Found	. Found	. Found	. Found	. Found	. Found	. Found	.	.	.	. Found	. Found	. Found	. Found	. Found	. Found	.	.
	High	[R].ANQAIQMACQSLGEPGCTQAQVLSAATIVAK.[H]	2xCarbamidomethyl [C9; C17]		5,63406E-05	0	5	Q9Y490	Talin-1 OS=Homo sapiens OX=9606 GN=TLN1 PE=1 SV=3	Q9Y490 [1470-1500]	0	321658098	0	0.673	0.465387250340189	32.72	111.6	88.4	67.18	4.57	. Found	. Found	. Found	. Found	. Found	.	. Found	.	. Found	. Found	. Found	. Found	. Found	. Found	. Found	. Found	. Found	. Found	. Found	. Found	. Found	. Found	. Found	. Found	. Found	. Found	. Found	.	. Found
	High	[R].ASDNLVK.[A]			0,147518	0,00522678	14	Q9Y490	Talin-1 OS=Homo sapiens OX=9606 GN=TLN1 PE=1 SV=3	Q9Y490 [2466-2472]	0	74640429	0	1.701	0.815637442317494	125.22	79.2	120.8	159.79	88.98	. Found	.	. Found	.	. Found	. Found	. Found	. Found	.	. Found	. Found	. Found	. Found	. Found	. Found	. Found	. Found	. Found	. Found	.	. Found	. Found	. Found	. Found	. Found	. Found	. Found	.	.
	High	[R].AVTDSINQLITMCTQQAPGQK.[E]	1xCarbamidomethyl [C13]; 1xOxidation [M12]		0,00189916	0,000313424	2	Q9Y490	Talin-1 OS=Homo sapiens OX=9606 GN=TLN1 PE=1 SV=3	Q9Y490 [1341-1361]	0	232012716	0	2.032	0.597493036902454	70.32	62.1	137.9	8.95	23.69	. Found	. Found	. Found	. Found	. Found	. Found	. Found	. Found	. Found	. Found	. Found	. Found	. Found	. Found	. Found	. Found	. Found	. Found	.	.	. Found	. Found	. Found	. Found	. Found	. Found	. Found	. Found	. Found
	High	[R].AVTDSINQLITMCTQQAPGQKECDNALR.[E]	2xCarbamidomethyl [C13; C23]		0,00387452	0,000313424	1	Q9Y490	Talin-1 OS=Homo sapiens OX=9606 GN=TLN1 PE=1 SV=3	Q9Y490 [1341-1368]	1	316249764	0								. Found	. Found	. Found	. Found	. Found	. Found	. Found	. Found	. Found	. Found	. Found	. Found	. Found	. Found	. Found	. Found	. Found	. Found	.	. Found	. Found	. Found	. Found	. Found	. Found	. Found	. Found	. Found	. Found
	High	[R].AVTDSINQLITMCTQQAPGQKECDNALRELETVR.[E]	2xCarbamidomethyl [C13; C23]		0,0806816	0,00214834	1	Q9Y490	Talin-1 OS=Homo sapiens OX=9606 GN=TLN1 PE=1 SV=3	Q9Y490 [1341-1374]	2	388988410	0								. Found	. Found	. Found	. Found	. Found	. Found	. Found	.	. Found	. Found	. Found	. Found	. Found	. Found	. Found	. Found	. Found	. Found	. Found	. Found	. Found	. Found	. Found	. Found	. Found	. Found	. Found	. Found	. Found
	High	[R].CVSCLPGQR.[D]	2xCarbamidomethyl [C1; C4]		0,05933	0,00122162	5	Q9Y490	Talin-1 OS=Homo sapiens OX=9606 GN=TLN1 PE=1 SV=3	Q9Y490 [1199-1207]	0	107649756	0	0.930	0.940196614154894	58.42	92.9	107.1	68.97	11.80	. Found	. Found	. Found	. Found	. Found	.	. Found	. Found	. Found	. Found	. Found	. Found	. Found	. Found	. Found	. Found	. Found	. Found	. Found	.	. Found	. Found	. Found	. Found	. Found	. Found	. Found	.	.
	High	[R].DDILNGSHPVSFDK.[A]			0,00138544	0	5	Q9Y490	Talin-1 OS=Homo sapiens OX=9606 GN=TLN1 PE=1 SV=3	Q9Y490 [221-234]	0	154373871	0								. Found	. Found	. Found	.	. Found	. Found	. Found	. Found	. Found	. Found	. Found	. Found	. Found	. Found	. Found	. Found	. Found	. Found	.	.	.	. Found	. Found	. Found	. Found	. Found	. Found	. Found	.
	High	[R].DKAPGQLECETAIAALNSCLR.[D]	2xCarbamidomethyl [C9; C19]		0,000275781	0	28	Q9Y490	Talin-1 OS=Homo sapiens OX=9606 GN=TLN1 PE=1 SV=3	Q9Y490 [1653-1673]	1	231712749	0	1.106	0.977134742088879	120.70	64.8	135.2	119.79	79.79	.	.	.	.	.	.	.	.	.	.	. Found	.	. Found	. Found	. Found	. Found	.	. Found	.	.	.	.	. Found	. Found	.	. Found	. Found	.	.
	High	[R].DLDQASLAAVSQQLAPR.[E]			3,15543E-05	0	39	Q9Y490	Talin-1 OS=Homo sapiens OX=9606 GN=TLN1 PE=1 SV=3	Q9Y490 [1674-1690]	0	178293445	0	1.443	0.964369058686853	104.83	77.5	122.5	124.02	48.56	.	.	.	.	.	.	.	.	.	. Found	. Found	. Found	. Found	. Found	. Found	. Found	. Found	. Found	.	.	.	. Found	. Found	. Found	. Found	. Found	. Found	.	.
	High	[R].DPPSWSVLAGHSR.[T]			1,2455E-05	0	28	Q9Y490	Talin-1 OS=Homo sapiens OX=9606 GN=TLN1 PE=1 SV=3	Q9Y490 [1626-1638]	0	140869679	0	1.364	0.990981590338927	118.53	88.9	111.1	137.49	74.15	. Found	. Found	. Found	.	.	.	. Found	. Found	.	. Found	. Found	. Found	. Found	. Found	. Found	. Found	. Found	. Found	.	.	.	.	.	.	. Found	. Found	. Found	.	.
	High	[R].DPVQLNLLYVQAR.[D]			0,00032071	0	7	Q9Y490	Talin-1 OS=Homo sapiens OX=9606 GN=TLN1 PE=1 SV=3	Q9Y490 [208-220]	0	152884820	0	0.937	0.98039981659082	70.71	90.5	109.5	99.15	31.12	. Found	. Found	. Found	. Found	. Found	. Found	. Found	. Found	. Found	. Found	. Found	. Found	. Found	. Found	. Found	. Found	. Found	. Found	.	.	.	. Found	. Found	. Found	. Found	. Found	. Found	. Found	. Found
	High	[R].EAAEGLR.[VM]			0,226768	0,00782232	7	Q9Y490	Talin-1 OS=Homo sapiens OX=9606 GN=TLN1 PE=1 SV=3	Q9Y490 [892-898]	0	74538389	0	1.336	0.97619640388844	111.38	69.5	130.5	132.54	74.15	. Found	. Found	. Found	. Found	. Found	. Found	. Found	. Found	. Found	. Found	. Found	. Found	. Found	. Found	. Found	. Found	. Found	. Found	. Found	.	.	. Found	. Found	. Found	. Found	. Found	. Found	. Found	.
	High	[R].ECANGYLELLDHVLLTLQKPSPELK.[Q]	1xCarbamidomethyl [C2]		9,72932E-06	0	18	Q9Y490	Talin-1 OS=Homo sapiens OX=9606 GN=TLN1 PE=1 SV=3	Q9Y490 [2242-2266]	0	288051756	0	1.183	0.99442888849185	87.08	106.0	94.0	44.04	119.15	. Found	. Found	. Found	. Found	.	.	.	.	.	. Found	. Found	. Found	. Found	. Found	. Found	. Found	. Found	. Found	. Found	.	.	.	.	. Found	. Found	. Found	. Found	.	. Found
	High	[R].EGISQEALHTQMLTAVQEISHLIEPLANAAR.[A]			1,95208E-05	0	17	Q9Y490	Talin-1 OS=Homo sapiens OX=9606 GN=TLN1 PE=1 SV=3	Q9Y490 [1691-1721]	0	337074236	0	1.387	0.956084375177942	116.51	78.1	121.9	100.25	100.43	. Found	. Found	. Found	.	.	.	.	.	.	. Found	. Found	. Found	. Found	. Found	. Found	. Found	. Found	. Found	. Found	.	. Found	. Found	. Found	. Found	. Found	. Found	. Found	.	.
	High	[R].EGTETFADHR.[E]			0,0319776	0,000840285	19	Q9Y490	Talin-1 OS=Homo sapiens OX=9606 GN=TLN1 PE=1 SV=3	Q9Y490 [2007-2016]	0	116251234	0	0.882	0.845458819193718	95.78	81.9	118.1	149.05	98.72	. Found	. Found	. Found	.	.	. Found	. Found	. Found	. Found	. Found	. Found	. Found	. Found	. Found	. Found	. Found	. Found	. Found	.	.	.	.	.	.	. Found	. Found	. Found	.	.
	High	[R].ELLENPVQPINDMSYFGCLDSVMENSK.[V]	1xCarbamidomethyl [C18]; 1xOxidation [M23]		0,0314395	0,000840285	2	Q9Y490	Talin-1 OS=Homo sapiens OX=9606 GN=TLN1 PE=1 SV=3	Q9Y490 [1375-1401]	0	314541626	0	1.422	0.916305792493448	85.80	73.4	126.6	35.47	93.99	. Found	. Found	. Found	. Found	. Found	. Found	. Found	. Found	. Found	. Found	. Found	. Found	. Found	. Found	. Found	. Found	. Found	. Found	. Found	.	.	. Found	. Found	. Found	. Found	. Found	. Found	. Found	. Found
	High	[R].ELLENPVQPINDMSYFGCLDSVMENSK.[V]	1xCarbamidomethyl [C18]		0,000158208	0	7	Q9Y490	Talin-1 OS=Homo sapiens OX=9606 GN=TLN1 PE=1 SV=3	Q9Y490 [1375-1401]	0	312942135	0	0.660	0.782483111260998	30.98	112.5	87.5	65.78	13.68	. Found	. Found	. Found	. Found	. Found	. Found	. Found	. Found	. Found	. Found	. Found	. Found	. Found	. Found	. Found	. Found	. Found	. Found	.	.	.	. Found	. Found	. Found	. Found	. Found	. Found	.	. Found
	High	[R].ELMEEKKEEITGTLR.[K]			0,0124851	0,000750615	3	Q9Y490	Talin-1 OS=Homo sapiens OX=9606 GN=TLN1 PE=1 SV=3	Q9Y490 [132-146]	2	180593134	0	0.010	1.18764845605701E-16		200.0				. Found	. Found	. Found	. Found	. Found	. Found	. Found	. Found	. Found	. Found	. Found	. Found	. Found	. Found	. Found	. Found	. Found	. Found	. Found	.	. Found	. Found	. Found	. Found	. Found	. Found	. Found	. Found	.
	High	[R].EQGVEEHETLLLR.[R]			0,00204531	0,000313424	16	Q9Y490	Talin-1 OS=Homo sapiens OX=9606 GN=TLN1 PE=1 SV=3	Q9Y490 [182-194]	0	155279656	0	0.569	0.572163375857526	30.27	81.8	118.2	83.02	64.25	. Found	. Found	. Found	. Found	. Found	.	.	. Found	. Found	. Found	. Found	. Found	. Found	. Found	. Found	. Found	. Found	. Found	. Found	. Found	.	. Found	. Found	.	. Found	. Found	.	.	.
	High	[R].ERIPEAPAGPPSDFGLFLSDDDPK.[K]			0,000114996	0	6	Q9Y490	Talin-1 OS=Homo sapiens OX=9606 GN=TLN1 PE=1 SV=3	Q9Y490 [34-57]	1	257024092	0								. Found	. Found	. Found	. Found	. Found	. Found	. Found	. Found	. Found	. Found	. Found	. Found	. Found	. Found	. Found	. Found	. Found	. Found	. Found	. Found	. Found	. Found	. Found	. Found	. Found	. Found	. Found	.	. Found
	High	[R].ERIPEAPAGPPSDFGLFLSDDDPKK.[G]			1,42378E-05	0	10	Q9Y490	Talin-1 OS=Homo sapiens OX=9606 GN=TLN1 PE=1 SV=3	Q9Y490 [34-58]	2	269833589	0	1.889	0.680523089684353	108.27	65.3	134.7	87.95	80.35	. Found	. Found	. Found	. Found	. Found	. Found	. Found	. Found	. Found	. Found	. Found	. Found	. Found	. Found	. Found	. Found	. Found	. Found	.	.	.	. Found	. Found	. Found	. Found	. Found	. Found	. Found	. Found
	High	[R].FGQDFSTFLEAGVEMAGQAPSQEDR.[A]	1xOxidation [M15]		0,00729219	0,000591694	1	Q9Y490	Talin-1 OS=Homo sapiens OX=9606 GN=TLN1 PE=1 SV=3	Q9Y490 [1274-1298]	0	273320970	0								. Found	. Found	. Found	. Found	. Found	. Found	.	. Found	. Found	. Found	. Found	. Found	. Found	. Found	. Found	. Found	. Found	. Found	. Found	. Found	. Found	. Found	. Found	. Found	. Found	. Found	. Found	. Found	. Found
	High	[R].FGQDFSTFLEAGVEMAGQAPSQEDR.[A]			5,79607E-06	0	27	Q9Y490	Talin-1 OS=Homo sapiens OX=9606 GN=TLN1 PE=1 SV=3	Q9Y490 [1274-1298]	0	271721478	0	0.856	0.9500492592737	72.27	90.7	109.3	82.03	75.62	. Found	. Found	.	.	. Found	.	.	.	.	. Found	. Found	. Found	. Found	. Found	. Found	. Found	. Found	. Found	.	.	.	.	.	.	. Found	. Found	. Found	.	.
	High	[R].GSQAQPDSPSAQLALIAASQSFLQPGGK.[M]			7,67876E-06	0	28	Q9Y490	Talin-1 OS=Homo sapiens OX=9606 GN=TLN1 PE=1 SV=3	Q9Y490 [972-999]	0	275440570	0	0.788	0.597402466519759	62.08	99.7	100.3	110.76	76.47	.	.	.	. Found	.	.	. Found	. Found	.	.	. Found	.	. Found	. Found	. Found	. Found	. Found	. Found	.	.	.	.	.	.	. Found	.	.	.	. Found
	High	[R].GTQACITAASAVSGIIADLDTTIMFATAGTLNR.[E]	1xCarbamidomethyl [C5]		0,019173	0,000840285	2	Q9Y490	Talin-1 OS=Homo sapiens OX=9606 GN=TLN1 PE=1 SV=3	Q9Y490 [1974-2006]	0	331166100	0	100.000	1.18764845605701E-16			200.0			. Found	. Found	. Found	. Found	. Found	. Found	. Found	. Found	. Found	. Found	. Found	. Found	. Found	. Found	. Found	. Found	. Found	. Found	. Found	. Found	. Found	. Found	. Found	. Found	. Found	. Found	. Found	. Found	.
	High	[R].GVAALTSDPAVQAIVLDTASDVLDK.[A]			3,29932E-05	0	20	Q9Y490	Talin-1 OS=Homo sapiens OX=9606 GN=TLN1 PE=1 SV=3	Q9Y490 [1137-1161]	0	246930827	0	1.501	0.957146616580929	113.96	84.0	116.0	129.75	73.06	. Found	. Found	. Found	.	.	.	.	.	.	. Found	. Found	. Found	. Found	. Found	. Found	. Found	. Found	. Found	.	.	.	. Found	. Found	.	. Found	. Found	. Found	.	.
	High	[R].GVAALTSDPAVQAIVLDTASDVLDKASSLIEEAKK.[A]			4,74608E-05	0	20	Q9Y490	Talin-1 OS=Homo sapiens OX=9606 GN=TLN1 PE=1 SV=3	Q9Y490 [1137-1171]	2	352588980	0	1.709	0.792959271262502	109.48	87.1	112.9	82.73	72.01	. Found	. Found	. Found	.	.	.	.	.	.	. Found	. Found	. Found	. Found	. Found	. Found	. Found	. Found	. Found	.	.	. Found	. Found	. Found	. Found	. Found	. Found	. Found	. Found	. Found
	High	[R].GVGAAATAVTQALNELLQHVK.[A]			1,46975E-06	0	23	Q9Y490	Talin-1 OS=Homo sapiens OX=9606 GN=TLN1 PE=1 SV=3	Q9Y490 [766-786]	0	209115568	2	1.230	0.999209963067217	94.55	91.6	108.4	80.66	52.71	.	.	.	.	.	.	.	.	.	. Found	.	.	. Found	. Found	. Found	. Found	. Found	. Found	.	.	. Found	. Found	. Found	. Found	. Found	. Found	. Found	.	.
	High	[R].IGITNHDEYSLVR.[E]			0,000490725	0	9	Q9Y490	Talin-1 OS=Homo sapiens OX=9606 GN=TLN1 PE=1 SV=3	Q9Y490 [119-131]	0	151677543	0	2.163	0.525385531779042	134.61	72.1	127.9	105.41	60.56	. Found	. Found	. Found	. Found	. Found	. Found	.	. Found	. Found	. Found	. Found	. Found	. Found	. Found	. Found	. Found	. Found	. Found	.	.	.	. Found	. Found	. Found	. Found	. Found	. Found	. Found	. Found
	High	[R].ILAQATSDLVNAIK.[A]			0,000812971	0	5	Q9Y490	Talin-1 OS=Homo sapiens OX=9606 GN=TLN1 PE=1 SV=3	Q9Y490 [828-841]	0	145683697	0	1.391	0.98039981659082	94.04	85.9	114.1	110.13	55.92	. Found	. Found	. Found	.	.	. Found	.	.	.	. Found	. Found	. Found	. Found	. Found	. Found	. Found	. Found	. Found	. Found	. Found	. Found	. Found	. Found	. Found	. Found	. Found	. Found	. Found	. Found
	High	[R].ILAQATSDLVNAIKADAEGESDLENSR.[K]			2,83711E-05	0	3	Q9Y490	Talin-1 OS=Homo sapiens OX=9606 GN=TLN1 PE=1 SV=3	Q9Y490 [828-854]	1	283040648	0								. Found	. Found	. Found	. Found	. Found	. Found	. Found	. Found	. Found	. Found	. Found	. Found	. Found	. Found	. Found	. Found	. Found	. Found	. Found	. Found	. Found	. Found	. Found	. Found	. Found	. Found	. Found	.	.
	High	[R].ILAQATSDLVNAIKADAEGESDLENSRK.[L]			5,14971E-08	0	12	Q9Y490	Talin-1 OS=Homo sapiens OX=9606 GN=TLN1 PE=1 SV=3	Q9Y490 [828-855]	2	295850145	0	0.482	0.320124959535416	23.51	139.3	60.7	47.78	72.12	. Found	. Found	. Found	. Found	. Found	. Found	.	.	.	. Found	. Found	. Found	. Found	. Found	. Found	. Found	. Found	. Found	.	.	.	. Found	. Found	. Found	. Found	. Found	. Found	. Found	. Found
	High	[R].IPEAPAGPPSDFGLFLSDDDPK.[K]			0,0864205	0,00250817	1	Q9Y490	Talin-1 OS=Homo sapiens OX=9606 GN=TLN1 PE=1 SV=3	Q9Y490 [36-57]	0	228509722	0								. Found	. Found	. Found	. Found	. Found	. Found	. Found	. Found	. Found	. Found	. Found	. Found	. Found	. Found	. Found	. Found	. Found	. Found	.	. Found	. Found	. Found	. Found	. Found	. Found	. Found	. Found	. Found	. Found
	High	[R].IPEAPAGPPSDFGLFLSDDDPKK.[G]			0,000861992	0	1	Q9Y490	Talin-1 OS=Homo sapiens OX=9606 GN=TLN1 PE=1 SV=3	Q9Y490 [36-58]	1	241319218	0	0.607	0.610870171784583	27.78	128.2	71.8	70.58	41.57	. Found	. Found	. Found	. Found	. Found	. Found	. Found	. Found	. Found	. Found	. Found	. Found	. Found	. Found	. Found	. Found	. Found	. Found	. Found	. Found	. Found	. Found	. Found	. Found	. Found	. Found	. Found	.	. Found
	High	[R].KFFYSDQNVDSRDPVQLNLLYVQAR.[D]			0,00403341	0,000313424	4	Q9Y490	Talin-1 OS=Homo sapiens OX=9606 GN=TLN1 PE=1 SV=3	Q9Y490 [196-220]	2	301553229	0	1.177	0.994806865988899	89.12	80.5	119.5	90.98		. Found	. Found	. Found	. Found	. Found	. Found	. Found	. Found	. Found	. Found	. Found	. Found	. Found	. Found	. Found	. Found	. Found	. Found	. Found	.	.	. Found	. Found	. Found	. Found	. Found	. Found	.	. Found
	High	[R].LASEAKPAAVAAENEEIGSHIK.[H]			1,10839E-05	0	47	Q9Y490	Talin-1 OS=Homo sapiens OX=9606 GN=TLN1 PE=1 SV=3	Q9Y490 [1896-1917]	0	223516155	0	1.175	0.993933863665215	112.90	84.8	115.2	145.03	54.52	. Found	. Found	. Found	.	.	.	.	.	.	. Found	. Found	. Found	. Found	. Found	. Found	. Found	. Found	. Found	.	.	.	.	.	.	. Found	.	. Found	.	.
	High	[R].LLSDSLPPSTGTFQEAQSR.[L]			0,010968	0,000750615	5	Q9Y490	Talin-1 OS=Homo sapiens OX=9606 GN=TLN1 PE=1 SV=3	Q9Y490 [1223-1241]	0	203401382	0	0.010	1.18764845605701E-16		200.0		100.99		. Found	. Found	. Found	. Found	. Found	. Found	. Found	. Found	. Found	. Found	. Found	. Found	. Found	. Found	. Found	. Found	. Found	. Found	.	.	.	. Found	. Found	. Found	. Found	. Found	. Found	. Found	. Found
	High	[R].LNEAAAGLNQAATELVQASR.[G]			3,03093E-06	0	58	Q9Y490	Talin-1 OS=Homo sapiens OX=9606 GN=TLN1 PE=1 SV=3	Q9Y490 [1242-1261]	0	202705161	0	1.299	0.998019339144021	130.40	63.1	136.9	144.74	90.41	.	.	.	.	.	.	.	.	.	. Found	. Found	. Found	. Found	. Found	. Found	. Found	. Found	. Found	.	.	.	.	.	.	.	.	.	.	.
	High	[R].LQAAGNAVKR.[A]			0,0439581	0,000840285	1	Q9Y490	Talin-1 OS=Homo sapiens OX=9606 GN=TLN1 PE=1 SV=3	Q9Y490 [2456-2465]	1	102760070	0								. Found	. Found	. Found	. Found	. Found	. Found	. Found	. Found	. Found	. Found	. Found	. Found	. Found	. Found	. Found	. Found	. Found	. Found	. Found	. Found	. Found	. Found	. Found	. Found	. Found	. Found	. Found	. Found	. Found
	High	[R].LREAAEGLR.[VM]			0,167697	0,00633877	8	Q9Y490	Talin-1 OS=Homo sapiens OX=9606 GN=TLN1 PE=1 SV=3	Q9Y490 [890-898]	1	101456907	0	0.461	0.024004253012696	30.98	68.7	131.3	138.88	77.72	. Found	. Found	. Found	. Found	. Found	.	. Found	. Found	. Found	. Found	. Found	. Found	. Found	. Found	. Found	. Found	. Found	. Found	. Found	.	.	. Found	. Found	. Found	. Found	. Found	. Found	.	.
	High	[R].MATNAAAQNAIK.[K]			0,000470936	0	4	Q9Y490	Talin-1 OS=Homo sapiens OX=9606 GN=TLN1 PE=1 SV=3	Q9Y490 [899-910]	0	120361503	0	1.273	0.964809977071434	85.20	116.0	84.0	87.64		. Found	. Found	. Found	. Found	. Found	. Found	.	. Found	.	. Found	. Found	. Found	. Found	. Found	. Found	. Found	. Found	. Found	. Found	.	. Found	. Found	. Found	. Found	. Found	. Found	. Found	. Found	.
	High	[R].MVAAATNNLCEAANAAVQGHASQEK.[L]	1xCarbamidomethyl [C10]		3,16404E-08	0	18	Q9Y490	Talin-1 OS=Homo sapiens OX=9606 GN=TLN1 PE=1 SV=3	Q9Y490 [2399-2423]	0	255619294	0	0.855	0.80987075588918	55.52	100.4	99.6	67.73	17.21	. Found	.	.	.	. Found	.	.	.	.	. Found	. Found	. Found	. Found	. Found	. Found	. Found	. Found	. Found	. Found	.	.	. Found	. Found	.	. Found	. Found	. Found	.	. Found
	High	[R].MVAAATNNLCEAANAAVQGHASQEK.[L]	1xCarbamidomethyl [C10]; 1xOxidation [M1]		0,000650178	0	1	Q9Y490	Talin-1 OS=Homo sapiens OX=9606 GN=TLN1 PE=1 SV=3	Q9Y490 [2399-2423]	0	257218786	0								. Found	. Found	. Found	. Found	. Found	. Found	. Found	. Found	. Found	. Found	. Found	. Found	. Found	. Found	. Found	. Found	. Found	. Found	. Found	. Found	.	. Found	. Found	. Found	. Found	. Found	. Found	. Found	. Found
	High	[R].QELAVFCSPEPPAK.[T]	1xCarbamidomethyl [C7]		0,000253117	0	14	Q9Y490	Talin-1 OS=Homo sapiens OX=9606 GN=TLN1 PE=1 SV=3	Q9Y490 [2155-2168]	0	157277266	0	1.431	0.953573241241185	91.68	80.1	119.9	118.79	38.07	. Found	. Found	. Found	.	. Found	. Found	. Found	. Found	. Found	. Found	. Found	. Found	. Found	. Found	. Found	. Found	. Found	. Found	.	.	.	. Found	. Found	. Found	. Found	. Found	. Found	.	.
	High	[R].QNLLQAAGNVGQASGELLQQIGESDTDPHFQDALMQLAK.[A]	1xOxidation [M35]		0,214981	0,00768987	4	Q9Y490	Talin-1 OS=Homo sapiens OX=9606 GN=TLN1 PE=1 SV=3	Q9Y490 [635-673]	0	415203023	0	1.207	0.97619640388844	55.11	88.5	111.5	28.48	33.92	. Found	. Found	. Found	. Found	. Found	. Found	. Found	. Found	. Found	. Found	. Found	. Found	. Found	. Found	. Found	. Found	. Found	. Found	. Found	. Found	. Found	. Found	. Found	. Found	. Found	. Found	. Found	. Found	. Found
	High	[R].QNLLQAAGNVGQASGELLQQIGESDTDPHFQDALMQLAK.[A]			0,000617544	0	2	Q9Y490	Talin-1 OS=Homo sapiens OX=9606 GN=TLN1 PE=1 SV=3	Q9Y490 [635-673]	0	413603531	0								. Found	. Found	. Found	. Found	. Found	. Found	. Found	. Found	. Found	. Found	. Found	. Found	. Found	. Found	. Found	. Found	. Found	. Found	. Found	. Found	. Found	. Found	. Found	. Found	. Found	. Found	. Found	. Found	. Found
	High	[R].RAIADMLR.[A]			0,0494729	0,000840285	21	Q9Y490	Talin-1 OS=Homo sapiens OX=9606 GN=TLN1 PE=1 SV=3	Q9Y490 [2210-2217]	1	94552985	0	1.319	0.990662691154869	109.76	105.0	95.0	100.96	88.50	. Found	. Found	. Found	.	.	.	.	.	.	. Found	. Found	. Found	. Found	. Found	. Found	. Found	. Found	. Found	. Found	.	.	. Found	. Found	. Found	. Found	. Found	. Found	.	.
	High	[R].SGASGPENFQVGSMPPAQQQITSGQMHR.[G]			0,120443	0,00369184	2	Q9Y490	Talin-1 OS=Homo sapiens OX=9606 GN=TLN1 PE=1 SV=3	Q9Y490 [455-482]	0	292735230	0								. Found	. Found	. Found	. Found	. Found	. Found	.	. Found	. Found	. Found	. Found	. Found	. Found	. Found	. Found	. Found	. Found	. Found	. Found	. Found	. Found	. Found	. Found	. Found	. Found	. Found	. Found	. Found	. Found
	High	[R].TEDSGLQTQVIAAATQCALSTSQLVACTK.[V]	2xCarbamidomethyl [C17; C27]		5,15802E-06	0	32	Q9Y490	Talin-1 OS=Homo sapiens OX=9606 GN=TLN1 PE=1 SV=3	Q9Y490 [693-721]	0	305249254	0	0.999	0.963092814450614	112.59	116.6	83.4	104.31	87.56	. Found	.	.	. Found	. Found	.	.	.	. Found	. Found	. Found	.	. Found	. Found	. Found	. Found	. Found	. Found	.	.	.	. Found	.	. Found	. Found	. Found	.	.	.
	High	[R].TLREQGVEEHETLLLR.[R]			0,000238779	0	16	Q9Y490	Talin-1 OS=Homo sapiens OX=9606 GN=TLN1 PE=1 SV=3	Q9Y490 [179-194]	1	192302941	0	1.291	0.983306306909598	97.66	62.0	138.0	92.21	41.60	. Found	. Found	. Found	. Found	. Found	. Found	.	.	.	. Found	. Found	. Found	. Found	. Found	. Found	. Found	. Found	. Found	. Found	.	.	.	. Found	. Found	. Found	. Found	. Found	.	.
	High	[R].TVSDSIK.[K]			0,22377	0,00782232	2	Q9Y490	Talin-1 OS=Homo sapiens OX=9606 GN=TLN1 PE=1 SV=3	Q9Y490 [1639-1645]	0	74940396	0	1.064	0.998771501037162	97.82	84.8	115.2	112.50	54.06	. Found	. Found	. Found	. Found	. Found	. Found	. Found	. Found	. Found	. Found	. Found	. Found	. Found	. Found	. Found	. Found	. Found	. Found	. Found	.	. Found	. Found	. Found	. Found	. Found	. Found	. Found	. Found	. Found
	High	[R].VAGSVTELIQAAEAMK.[G]	1xOxidation [M15]		0,00238235	0,000313424	4	Q9Y490	Talin-1 OS=Homo sapiens OX=9606 GN=TLN1 PE=1 SV=3	Q9Y490 [2276-2291]	0	163384655	0	0.738	0.863657207021346	56.62	73.3	126.7	122.62	61.55	. Found	. Found	. Found	. Found	. Found	. Found	. Found	. Found	. Found	. Found	. Found	. Found	. Found	. Found	. Found	. Found	. Found	. Found	.	.	.	. Found	. Found	. Found	. Found	. Found	. Found	. Found	. Found
	High	[R].VAGSVTELIQAAEAMK.[G]			0,00207445	0,000313424	21	Q9Y490	Talin-1 OS=Homo sapiens OX=9606 GN=TLN1 PE=1 SV=3	Q9Y490 [2276-2291]	0	161785163	0	1.372	0.956084375177942	74.44	80.3	119.7	83.80	48.04	. Found	. Found	. Found	.	.	.	.	.	.	. Found	. Found	. Found	. Found	. Found	. Found	. Found	. Found	. Found	. Found	.	.	. Found	. Found	.	. Found	. Found	. Found	.	.
	High	[R].VQELGHGCAALVTK.[A]	1xCarbamidomethyl [C8]		1,78552E-05	0	41	Q9Y490	Talin-1 OS=Homo sapiens OX=9606 GN=TLN1 PE=1 SV=3	Q9Y490 [1920-1933]	0	148277332	0	1.209	0.999209963067217	101.41	75.7	124.3	142.30	40.23	. Found	.	.	.	.	.	.	.	. Found	. Found	. Found	.	. Found	. Found	. Found	. Found	. Found	. Found	.	.	.	. Found	.	.	. Found	. Found	. Found	.	.
	High	[R].YDQATDTILTVTENIFSSMGDAGEMVR.[Q]			0,0640237	0,00141145	3	Q9Y490	Talin-1 OS=Homo sapiens OX=9606 GN=TLN1 PE=1 SV=3	Q9Y490 [798-824]	0	296436013	0	1.389	0.935524349630532	82.95	84.0	116.0	56.40	76.66	. Found	. Found	. Found	. Found	. Found	. Found	. Found	. Found	. Found	. Found	. Found	. Found	. Found	. Found	. Found	. Found	. Found	. Found	. Found	. Found	. Found	. Found	. Found	. Found	. Found	. Found	. Found	.	.
	High	[R].YDQATDTILTVTENIFSSMGDAGEMVR.[Q]	2xOxidation [M19; M25]		0,00597105	0,000591694	1	Q9Y490	Talin-1 OS=Homo sapiens OX=9606 GN=TLN1 PE=1 SV=3	Q9Y490 [798-824]	0	299634996	0	0.842	0.968093602891856	51.47	112.4	87.6	33.88	62.30	. Found	. Found	. Found	. Found	. Found	. Found	. Found	. Found	. Found	. Found	. Found	. Found	. Found	. Found	. Found	. Found	. Found	. Found	. Found	. Found	.	. Found	. Found	. Found	. Found	. Found	. Found	. Found	. Found
	High	[R].YDQATDTILTVTENIFSSMGDAGEMVR.[Q]	1xOxidation [M25]		0,10106	0,00302604	1	Q9Y490	Talin-1 OS=Homo sapiens OX=9606 GN=TLN1 PE=1 SV=3	Q9Y490 [798-824]	0	298035504	0	100.000	1.18764845605701E-16			200.0		109.37	. Found	. Found	. Found	. Found	. Found	. Found	. Found	. Found	. Found	. Found	. Found	. Found	. Found	. Found	. Found	. Found	. Found	. Found	. Found	. Found	. Found	. Found	. Found	. Found	. Found	. Found	. Found	. Found	. Found
	High	[RK].TYGVSFFLVK.[E]			0,0431993	0,000840285	1	Q9Y490	Talin-1 OS=Homo sapiens OX=9606 GN=TLN1 PE=1 SV=3	Q9Y490 [307-316]	0	116063502	0	1.129	0.977134742088879	84.89	87.1	112.9	95.04	49.62	. Found	. Found	. Found	. Found	. Found	. Found	. Found	. Found	. Found	. Found	. Found	. Found	. Found	. Found	. Found	. Found	. Found	. Found	.	. Found	. Found	. Found	. Found	. Found	. Found	. Found	. Found	. Found	. Found
High	Master Protein	P21333	Filamin-A OS=Homo sapiens OX=9606 GN=FLNA PE=1 SV=4	60	126	2152	126	2647	280,6	6,06	1.247	0.32	0.662212	.	.	.	.	.	.	.	.	.	.	.	.	. Found	. Found	.	. Found	. Found	. Found	.	.	.	.	.	.	.	.	.	.	.	.	.	.	.	. Found	. Found	. Found
	Confidence	Annotated Sequence	Modifications	Modifications in Master Proteins	Qvality PEP	Qvality q-value	# PSMs	Master Protein Accessions	Master Protein Descriptions	Positions in Master Proteins	# Missed Cleavages	Theo. MH+ [Da]	# Razor Quan Results	Abundance Ratio: (HDL) / (Control)	Abundance Ratio Adj. P-Value: (HDL) / (Control)	Abundance Ratio Variability [%]: (HDL) / (Control)	Abundances (Grouped): Control	Abundances (Grouped): HDL	Abundances (Grouped) CV [%]: Control	Abundances (Grouped) CV [%]: HDL	Found in Sample: [S2] F2: Sample, C7, Control, Replicate 1	Found in Sample: [S3] F3: Sample, C7, Control, Replicate 2	Found in Sample: [S4] F4: Sample, C7, Control, Replicate 3	Found in Sample: [S5] F5: Sample, C9, Control, Replicate 1	Found in Sample: [S6] F6: Sample, C9, Control, Replicate 2	Found in Sample: [S7] F7: Sample, C9, Control, Replicate 3	Found in Sample: [S8] F8: Sample, C10, Control, Replicate 1	Found in Sample: [S9] F9: Sample, C10, Control, Replicate 2	Found in Sample: [S10] F10: Sample, C10, Control, Replicate 3	Found in Sample: [S20] F20: Sample, C5, Control, Replicate 1	Found in Sample: [S21] F21: Sample, C5, Control, Replicate 2	Found in Sample: [S22] F22: Sample, C5, Control, Replicate 3	Found in Sample: [S23] F23: Sample, C6, Control, Replicate 1	Found in Sample: [S24] F24: Sample, C6, Control, Replicate 2	Found in Sample: [S25] F25: Sample, C6, Control, Replicate 3	Found in Sample: [S26] F26: Sample, C8, Control, Replicate 1	Found in Sample: [S27] F27: Sample, C8, Control, Replicate 2	Found in Sample: [S28] F28: Sample, C8, Control, Replicate 3	Found in Sample: [S38] F38: Sample, C1, Control, Replicate 1	Found in Sample: [S39] F39: Sample, C1, Control, Replicate 2	Found in Sample: [S40] F40: Sample, C1, Control, Replicate 3	Found in Sample: [S41] F41: Sample, C4, Control, Replicate 1	Found in Sample: [S42] F42: Sample, C4, Control, Replicate 2	Found in Sample: [S43] F43: Sample, C4, Control, Replicate 3	Found in Sample: [S11] F11: Sample, H1, HDL, Replicate 1	Found in Sample: [S12] F12: Sample, H1, HDL, Replicate 2	Found in Sample: [S13] F13: Sample, H1, HDL, Replicate 3	Found in Sample: [S14] F14: Sample, H2, HDL, Replicate 1	Found in Sample: [S15] F15: Sample, H2, HDL, Replicate 2
	High	[K].AEGPGLSR.[T]			0,05933	0,00122162	15	P21333	Filamin-A OS=Homo sapiens OX=9606 GN=FLNA PE=1 SV=4	P21333 [877-884]	0	78641044	0	0.650	0.675154993269926	52.75	89.3	110.7	136.19	85.77	. Found	. Found	. Found	. Found	.	.	.	.	.	. Found	. Found	. Found	. Found	. Found	. Found	. Found	. Found	. Found	.	.	. Found	. Found	.	.	. Found	. Found	. Found	. Found	.
	High	[K].AEISCTDNQDGTCSVSYLPVLPGDYSILVK.[Y]	2xCarbamidomethyl [C5; C13]		0,00122234	0	10	P21333	Filamin-A OS=Homo sapiens OX=9606 GN=FLNA PE=1 SV=4	P21333 [1908-1937]	0	330156029	0	0.544	0.627459663105822	15.41	101.7	98.3	92.75	15.35	. Found	. Found	. Found	. Found	. Found	. Found	. Found	. Found	. Found	. Found	. Found	. Found	. Found	. Found	. Found	. Found	. Found	. Found	. Found	.	.	.	. Found	.	. Found	. Found	. Found	.	.
	High	[K].AEISFEDR.[K]			0,226768	0,00782232	2	P21333	Filamin-A OS=Homo sapiens OX=9606 GN=FLNA PE=1 SV=4	P21333 [2281-2288]	0	96645270	0	1.069	0.998435122295773	87.63	76.3	123.7	81.76	30.31	. Found	. Found	. Found	. Found	. Found	. Found	. Found	. Found	.	. Found	. Found	. Found	. Found	. Found	. Found	. Found	. Found	. Found	. Found	.	. Found	. Found	. Found	. Found	. Found	. Found	. Found	. Found	. Found
	High	[K].AEISFEDRK.[D]			0,0397835	0,000840285	3	P21333	Filamin-A OS=Homo sapiens OX=9606 GN=FLNA PE=1 SV=4	P21333 [2281-2289]	1	109454766	0	1.842	0.670899217725182	93.46	71.6	128.4	69.15	64.28	. Found	. Found	. Found	.	. Found	.	. Found	. Found	. Found	. Found	. Found	. Found	. Found	. Found	. Found	. Found	. Found	. Found	. Found	. Found	.	. Found	. Found	. Found	. Found	. Found	. Found	. Found	. Found
	High	[K].AFGPGLQGGSAGSPAR.[F]			0,00036914	0	28	P21333	Filamin-A OS=Homo sapiens OX=9606 GN=FLNA PE=1 SV=4	P21333 [1072-1087]	0	142971825	0	1.700	0.833704008822471	72.47	74.6	125.4	133.63	29.49	. Found	. Found	. Found	.	.	.	.	.	.	. Found	. Found	. Found	. Found	. Found	. Found	. Found	. Found	. Found	.	.	.	.	.	.	.	. Found	. Found	.	.
	High	[K].AGNNMLLVGVHGPR.[T]			0,000220664	0	20	P21333	Filamin-A OS=Homo sapiens OX=9606 GN=FLNA PE=1 SV=4	P21333 [2585-2598]	0	143476343	0	1.324	0.990981590338927	95.45	108.1	91.9	96.40	72.58	. Found	. Found	. Found	.	.	. Found	.	.	.	. Found	. Found	. Found	. Found	. Found	. Found	. Found	. Found	. Found	.	.	.	. Found	. Found	. Found	. Found	. Found	. Found	.	.
	High	[K].AGVAPLQVK.[V]			0,0269019	0,000840285	5	P21333	Filamin-A OS=Homo sapiens OX=9606 GN=FLNA PE=1 SV=4	P21333 [1478-1486]	0	88254073	0	1.444	0.965103206330036	79.37	74.7	125.3	138.62	33.70	. Found	. Found	. Found	. Found	. Found	. Found	. Found	. Found	. Found	. Found	. Found	. Found	. Found	. Found	. Found	. Found	. Found	. Found	.	.	.	. Found	. Found	. Found	. Found	. Found	. Found	. Found	. Found
	High	[K].AHEPTYFTVDCAEAGQGDVSIGIK.[C]	1xCarbamidomethyl [C11]		1,39957E-05	0	30	P21333	Filamin-A OS=Homo sapiens OX=9606 GN=FLNA PE=1 SV=4	P21333 [786-809]	0	256519259	0	1.108	0.974874541096762	72.97	107.5	92.5	73.11	37.00	. Found	.	.	.	. Found	.	.	. Found	.	. Found	.	. Found	. Found	. Found	. Found	. Found	. Found	. Found	.	.	.	.	. Found	.	.	.	.	.	.
	High	[K].AHVVPCFDASK.[V]	1xCarbamidomethyl [C6]		0,0126837	0,000750615	25	P21333	Filamin-A OS=Homo sapiens OX=9606 GN=FLNA PE=1 SV=4	P21333 [1152-1162]	0	123059357	0	1.186	0.994806865988899	116.19	61.4	138.6	125.34	66.51	.	. Found	. Found	.	.	.	. Found	. Found	.	. Found	. Found	. Found	. Found	. Found	. Found	. Found	. Found	. Found	. Found	.	.	. Found	.	.	. Found	. Found	. Found	.	.
	High	[K].ASGPGLNTTGVPASLPVEFTIDAK.[D]			0,00470646	0,000313424	2	P21333	Filamin-A OS=Homo sapiens OX=9606 GN=FLNA PE=1 SV=4	P21333 [1550-1573]	0	234222382	0								. Found	. Found	. Found	. Found	. Found	. Found	. Found	. Found	. Found	. Found	. Found	. Found	. Found	. Found	. Found	. Found	. Found	. Found	. Found	.	.	. Found	. Found	. Found	. Found	. Found	. Found	. Found	. Found
	High	[K].ATCAPQHGAPGPGPADASK.[V]	1xCarbamidomethyl [C3]		3,72019E-05	0	11	P21333	Filamin-A OS=Homo sapiens OX=9606 GN=FLNA PE=1 SV=4	P21333 [2541-2559]	0	178982861	0	2.548	0.195435188955867	88.26	50.9	149.1	86.15	45.71	. Found	. Found	. Found	.	.	. Found	. Found	. Found	. Found	. Found	. Found	. Found	. Found	. Found	. Found	. Found	. Found	. Found	. Found	.	.	.	. Found	. Found	. Found	. Found	. Found	.	.
	High	[K].CAPGVVGPAEADIDFDIIR.[N]	1xCarbamidomethyl [C1]		0,000254859	0	10	P21333	Filamin-A OS=Homo sapiens OX=9606 GN=FLNA PE=1 SV=4	P21333 [810-828]	0	201499025	0	0.673	0.842820456008361	45.21	101.2	98.8	80.97	57.95	. Found	. Found	. Found	.	.	. Found	.	.	.	. Found	. Found	. Found	. Found	. Found	. Found	. Found	. Found	. Found	. Found	.	.	. Found	. Found	. Found	. Found	. Found	. Found	.	.
	High	[K].CAPGVVGPAEADIDFDIIRNDNDTFTVK.[Y]	1xCarbamidomethyl [C1]		0,00013983	0	10	P21333	Filamin-A OS=Homo sapiens OX=9606 GN=FLNA PE=1 SV=4	P21333 [810-837]	1	304945714	0	0.010	1.18764845605701E-16		200.0				. Found	. Found	. Found	.	.	. Found	. Found	. Found	. Found	. Found	. Found	. Found	. Found	. Found	. Found	. Found	. Found	. Found	. Found	.	.	. Found	. Found	. Found	. Found	. Found	. Found	. Found	.
	High	[K].CSGPGLSPGMVR.[A]	1xCarbamidomethyl [C1]		0,00440449	0,000313424	15	P21333	Filamin-A OS=Homo sapiens OX=9606 GN=FLNA PE=1 SV=4	P21333 [1453-1464]	0	121757654	0	0.584	0.507349212231418	34.99	134.7	65.3	114.69	73.77	. Found	. Found	. Found	.	.	.	.	. Found	. Found	. Found	. Found	. Found	. Found	. Found	. Found	. Found	. Found	. Found	. Found	.	.	. Found	. Found	. Found	. Found	. Found	. Found	.	.
	High	[K].CSGPGLSPGMVR.[A]	1xCarbamidomethyl [C1]; 1xOxidation [M10]		0,21212	0,00737764	1	P21333	Filamin-A OS=Homo sapiens OX=9606 GN=FLNA PE=1 SV=4	P21333 [1453-1464]	0	123357145	0								. Found	. Found	. Found	. Found	. Found	. Found	. Found	. Found	. Found	. Found	. Found	. Found	. Found	. Found	. Found	. Found	. Found	. Found	.	. Found	. Found	. Found	. Found	. Found	. Found	. Found	. Found	. Found	. Found
	High	[K].DAGEGGLSLAIEGPSK.[A]			3,24322E-05	0	28	P21333	Filamin-A OS=Homo sapiens OX=9606 GN=FLNA PE=1 SV=4	P21333 [1892-1907]	0	150075403	0	1.364	0.98440280464679	99.20	90.3	109.7	109.33	62.41	.	. Found	. Found	.	.	.	. Found	.	.	.	.	.	. Found	. Found	. Found	. Found	. Found	. Found	.	.	.	. Found	. Found	. Found	. Found	. Found	. Found	.	.
	High	[K].DAGEGGLSLAIEGPSKAEISCTDNQDGTCSVSYLPVLPGDYSILVK.[Y]	2xCarbamidomethyl [C21; C29]		0,000303582	0	2	P21333	Filamin-A OS=Homo sapiens OX=9606 GN=FLNA PE=1 SV=4	P21333 [1892-1937]	1	478329647	0	100.000	1.18764845605701E-16			200.0		25.37	. Found	. Found	. Found	. Found	. Found	. Found	.	. Found	. Found	. Found	. Found	. Found	. Found	. Found	. Found	. Found	. Found	. Found	. Found	. Found	. Found	. Found	. Found	. Found	. Found	. Found	. Found	. Found	. Found
	High	[K].DAGEGLLAVQITDPEGKPK.[K]			0,000529191	0	5	P21333	Filamin-A OS=Homo sapiens OX=9606 GN=FLNA PE=1 SV=4	P21333 [1574-1592]	0	193801785	0	1.668	0.824745873201846	105.17	63.4	136.6	109.41	57.69	. Found	. Found	. Found	. Found	. Found	. Found	. Found	. Found	. Found	. Found	. Found	. Found	. Found	. Found	. Found	. Found	. Found	. Found	. Found	. Found	.	. Found	. Found	. Found	. Found	. Found	. Found	. Found	.
	High	[K].DGSCGVAYVVQEPGDYEVSVK.[F]	1xCarbamidomethyl [C4]		4,34113E-05	0	30	P21333	Filamin-A OS=Homo sapiens OX=9606 GN=FLNA PE=1 SV=4	P21333 [2290-2310]	0	225802815	0	1.792	0.813156939322472	80.26	74.6	125.4	97.65	25.20	. Found	. Found	. Found	.	.	.	.	.	.	. Found	. Found	. Found	. Found	. Found	. Found	. Found	. Found	. Found	.	.	.	. Found	.	.	. Found	. Found	. Found	.	.
	High	[K].DKGEYTLVVK.[W]			0,0116772	0,000750615	16	P21333	Filamin-A OS=Homo sapiens OX=9606 GN=FLNA PE=1 SV=4	P21333 [2622-2631]	1	115163067	0	0.913	0.841182491859467	69.47	97.1	102.9	89.09	51.62	. Found	. Found	. Found	.	.	.	. Found	.	. Found	. Found	. Found	. Found	. Found	. Found	. Found	. Found	. Found	. Found	.	.	.	.	. Found	.	. Found	.	.	. Found	.
	High	[K].DLAEDAPWKK.[I]			0,0526234	0,0010353	2	P21333	Filamin-A OS=Homo sapiens OX=9606 GN=FLNA PE=1 SV=4	P21333 [34-43]	1	117259461	0	0.604	0.730706129623868	39.06	95.9	104.1	117.60	7.70	. Found	. Found	. Found	. Found	. Found	. Found	. Found	. Found	. Found	. Found	. Found	. Found	. Found	. Found	. Found	. Found	. Found	. Found	.	. Found	. Found	. Found	. Found	. Found	. Found	. Found	. Found	. Found	. Found
	High	[K].ETGEHLVHVK.[K]			0,00726456	0,000591694	39	P21333	Filamin-A OS=Homo sapiens OX=9606 GN=FLNA PE=1 SV=4	P21333 [2015-2024]	0	114860585	0	1.275	0.998528233175457	134.30	153.4	46.6	138.45	101.36	. Found	. Found	. Found	.	.	.	.	.	.	. Found	. Found	. Found	. Found	. Found	. Found	. Found	. Found	. Found	. Found	.	.	.	.	.	. Found	. Found	. Found	.	.
	High	[K].FNEEHIPDSPFVVPVASPSGDAR.[R]			0,00583842	0,000591694	2	P21333	Filamin-A OS=Homo sapiens OX=9606 GN=FLNA PE=1 SV=4	P21333 [2311-2333]	0	246718883	0	1.725	0.821202378064323	129.73	69.2	130.8	141.77	100.85	. Found	. Found	. Found	. Found	. Found	. Found	. Found	. Found	. Found	. Found	. Found	. Found	. Found	. Found	. Found	. Found	. Found	. Found	. Found	. Found	. Found	. Found	. Found	. Found	. Found	. Found	. Found	. Found	. Found
	High	[K].GDAVRDVDIIDHHDNTYTVK.[Y]			0,0930152	0,00285185	3	P21333	Filamin-A OS=Homo sapiens OX=9606 GN=FLNA PE=1 SV=4	P21333 [917-936]	1	228310001	0	0.860	0.9500492592737	46.12	112.1	87.9	61.03	26.47	. Found	. Found	. Found	. Found	. Found	. Found	. Found	. Found	. Found	. Found	. Found	. Found	. Found	. Found	. Found	. Found	. Found	. Found	. Found	. Found	.	. Found	. Found	. Found	. Found	. Found	. Found	. Found	. Found
	High	[K].GKLDVQFSGLTK.[G]			0,0016157	0	28	P21333	Filamin-A OS=Homo sapiens OX=9606 GN=FLNA PE=1 SV=4	P21333 [905-916]	1	129272088	0	1.674	0.863657207021346	115.85	68.8	131.2	142.15	61.49	. Found	. Found	. Found	.	.	.	.	.	.	. Found	. Found	. Found	. Found	. Found	. Found	. Found	. Found	. Found	.	.	.	.	. Found	. Found	. Found	. Found	. Found	.	.
	High	[K].GLVEPVDVVDNADGTQTVNYVPSR.[E]			2,5708E-06	0	48	P21333	Filamin-A OS=Homo sapiens OX=9606 GN=FLNA PE=1 SV=4	P21333 [1492-1515]	0	254425764	0	1.551	0.938733636715888	103.15	71.8	128.2	117.35	54.08	. Found	.	.	.	.	.	.	.	.	. Found	.	. Found	. Found	. Found	. Found	. Found	. Found	. Found	.	.	.	.	.	.	.	.	. Found	.	.
	High	[K].GTVEPQLEAR.[G]			0,016045	0,000750615	29	P21333	Filamin-A OS=Homo sapiens OX=9606 GN=FLNA PE=1 SV=4	P21333 [428-437]	0	109957421	0	1.751	0.806707895181891	100.11	75.0	125.0	147.36	9.92	.	. Found	.	.	.	.	.	.	.	. Found	. Found	. Found	. Found	. Found	. Found	. Found	. Found	. Found	.	.	.	.	.	.	. Found	. Found	. Found	.	.
	High	[K].HTAMVSWGGVSIPNSPFR.[V]			0,000188454	0	19	P21333	Filamin-A OS=Homo sapiens OX=9606 GN=FLNA PE=1 SV=4	P21333 [743-760]	0	194295923	0	1.447	0.968093602891856	50.14	87.8	112.2	39.49	14.77	. Found	. Found	. Found	. Found	. Found	. Found	.	.	. Found	. Found	. Found	. Found	. Found	. Found	. Found	. Found	. Found	. Found	.	.	.	. Found	.	.	. Found	. Found	. Found	.	.
	High	[K].HTAMVSWGGVSIPNSPFR.[V]	1xOxidation [M4]		0,0129369	0,000750615	1	P21333	Filamin-A OS=Homo sapiens OX=9606 GN=FLNA PE=1 SV=4	P21333 [743-760]	0	195895414	0	1.134	0.988984339489197	101.74	98.7	101.3	100.75	13.17	. Found	. Found	. Found	. Found	. Found	. Found	. Found	. Found	. Found	. Found	. Found	. Found	. Found	. Found	. Found	. Found	. Found	. Found	. Found	. Found	. Found	. Found	. Found	. Found	. Found	. Found	. Found	.	. Found
	High	[K].IECDDKGDGSCDVR.[Y]	2xCarbamidomethyl [C3; C11]		0,0078991	0,000750615	10	P21333	Filamin-A OS=Homo sapiens OX=9606 GN=FLNA PE=1 SV=4	P21333 [621-634]	1	162565301	0	0.531	0.267506820183213	35.39	128.8	71.2	101.41	90.68	. Found	. Found	. Found	.	. Found	. Found	. Found	.	.	. Found	. Found	. Found	. Found	. Found	. Found	. Found	. Found	. Found	. Found	.	. Found	. Found	. Found	. Found	. Found	. Found	. Found	. Found	. Found
	High	[K].IKVSGLGEK.[V]			0,141538	0,00488789	4	P21333	Filamin-A OS=Homo sapiens OX=9606 GN=FLNA PE=1 SV=4	P21333 [974-982]	1	93056186	0	0.698	0.82590956739843	55.30	91.6	108.4	143.92	29.32	. Found	. Found	. Found	. Found	. Found	. Found	. Found	. Found	. Found	. Found	. Found	. Found	. Found	. Found	. Found	. Found	. Found	. Found	. Found	. Found	.	. Found	. Found	. Found	. Found	. Found	. Found	. Found	. Found
	High	[K].IPEISIQDMTAQVTSPSGK.[T]			2,69483E-05	0	2	P21333	Filamin-A OS=Homo sapiens OX=9606 GN=FLNA PE=1 SV=4	P21333 [2166-2184]	0	200201613	0	0.010	1.18764845605701E-16		200.0				. Found	. Found	. Found	. Found	. Found	. Found	. Found	. Found	. Found	. Found	. Found	. Found	. Found	. Found	. Found	. Found	. Found	. Found	.	.	. Found	. Found	. Found	. Found	. Found	. Found	. Found	. Found	. Found
	High	[K].IQQNTFTR.[W]			0,0360343	0,000840285	26	P21333	Filamin-A OS=Homo sapiens OX=9606 GN=FLNA PE=1 SV=4	P21333 [44-51]	0	100752687	0	1.078	0.964369058686853	82.01	88.0	112.0	112.31	33.97	. Found	. Found	. Found	.	.	.	.	.	.	. Found	.	. Found	. Found	. Found	. Found	. Found	. Found	. Found	.	.	.	.	.	. Found	. Found	. Found	. Found	.	.
	High	[K].IVGPSGAAVPCK.[V]	1xCarbamidomethyl [C11]		0,00121388	0	25	P21333	Filamin-A OS=Homo sapiens OX=9606 GN=FLNA PE=1 SV=4	P21333 [1008-1019]	0	115561906	0	1.115	0.984414833138462	116.70	89.3	110.7	156.41	62.25	. Found	.	. Found	.	.	.	. Found	.	.	. Found	. Found	. Found	. Found	. Found	. Found	. Found	. Found	. Found	.	.	.	.	.	.	. Found	. Found	. Found	.	.
	High	[K].IVGPSGAAVPCKVEPGLGADNSVVR.[F]	1xCarbamidomethyl [C11]		2,99718E-05	0	31	P21333	Filamin-A OS=Homo sapiens OX=9606 GN=FLNA PE=1 SV=4	P21333 [1008-1032]	1	244928677	0	1.546	0.91172986404068	100.24	86.3	113.7	96.03	72.23	.	. Found	.	.	.	.	.	.	.	. Found	. Found	. Found	. Found	. Found	. Found	. Found	. Found	. Found	.	.	. Found	.	.	.	.	.	. Found	.	.
	High	[K].KGEITGEVR.[M]			0,0445367	0,000840285	19	P21333	Filamin-A OS=Homo sapiens OX=9606 GN=FLNA PE=1 SV=4	P21333 [1801-1809]	1	98854218	0	1.246	0.999209963067217	139.70	119.5	80.5	124.32	122.11	. Found	. Found	. Found	.	. Found	. Found	. Found	.	.	. Found	. Found	.	. Found	. Found	. Found	. Found	. Found	. Found	. Found	.	.	. Found	. Found	. Found	. Found	. Found	.	. Found	.
	High	[K].KIQQNTFTR.[W]			0,0126337	0,000750615	1	P21333	Filamin-A OS=Homo sapiens OX=9606 GN=FLNA PE=1 SV=4	P21333 [43-51]	1	113562183	0	0.893	0.945985456493626	33.88	110.3	89.7	24.11	21.96	. Found	. Found	. Found	. Found	. Found	. Found	. Found	. Found	. Found	. Found	. Found	. Found	. Found	. Found	. Found	. Found	. Found	. Found	. Found	. Found	.	. Found	. Found	. Found	. Found	. Found	. Found	. Found	. Found
	High	[K].LDVQFSGLTK.[G]			0,0170447	0,000750615	7	P21333	Filamin-A OS=Homo sapiens OX=9606 GN=FLNA PE=1 SV=4	P21333 [907-916]	0	110760445	0	1.444	0.965273814243824	107.00	62.9	137.1	139.37	53.92	. Found	. Found	. Found	. Found	. Found	. Found	. Found	. Found	. Found	. Found	. Found	. Found	. Found	. Found	. Found	. Found	. Found	. Found	.	. Found	.	. Found	. Found	. Found	. Found	. Found	. Found	.	.
	High	[K].LKPGAPLRPK.[L]			0,00924532	0,000750615	34	P21333	Filamin-A OS=Homo sapiens OX=9606 GN=FLNA PE=1 SV=4	P21333 [269-278]	0	107669387	0	1.183	0.992956321661076	136.90	90.0	110.0	111.40	90.37	. Found	.	. Found	. Found	.	.	.	.	.	. Found	. Found	. Found	. Found	. Found	. Found	. Found	. Found	. Found	.	.	.	.	.	.	. Found	. Found	.	.	.
	High	[K].LPQLPITNFSR.[D]			0,00353749	0,000313424	25	P21333	Filamin-A OS=Homo sapiens OX=9606 GN=FLNA PE=1 SV=4	P21333 [180-190]	0	128572630	0	1.054	0.964369058686853	125.13	70.4	129.6	145.09	80.62	. Found	. Found	. Found	.	.	.	.	. Found	.	. Found	. Found	. Found	. Found	. Found	. Found	. Found	. Found	. Found	.	.	.	.	. Found	.	. Found	. Found	. Found	.	.
	High	[K].LQVEPAVDTSGVQCYGPGIEGQGVFR.[E]	1xCarbamidomethyl [C14]		1,97904E-05	0	24	P21333	Filamin-A OS=Homo sapiens OX=9606 GN=FLNA PE=1 SV=4	P21333 [1247-1272]	0	276334065	0	1.434	0.968093602891856	57.82	84.0	116.0	57.15	41.91	. Found	. Found	. Found	.	.	.	.	.	. Found	. Found	.	.	. Found	. Found	. Found	. Found	. Found	. Found	.	.	.	.	. Found	. Found	.	. Found	. Found	.	.
	High	[K].MDCQECPEGYR.[V]	2xCarbamidomethyl [C3; C6]		0,00467185	0,000313424	5	P21333	Filamin-A OS=Homo sapiens OX=9606 GN=FLNA PE=1 SV=4	P21333 [2474-2484]	0	144452900	0	0.532	0.446368650348512	22.18	144.5	55.5	74.91	39.89	. Found	. Found	. Found	. Found	. Found	.	. Found	. Found	. Found	. Found	. Found	. Found	. Found	. Found	. Found	. Found	. Found	. Found	. Found	.	. Found	. Found	. Found	.	. Found	. Found	. Found	. Found	.
	High	[K].MDCQECPEGYRVTYTPMAPGSYLISIK.[Y]	2xCarbamidomethyl [C3; C6]		0,0013241	0	1	P21333	Filamin-A OS=Homo sapiens OX=9606 GN=FLNA PE=1 SV=4	P21333 [2474-2500]	1	316643522	0								. Found	. Found	. Found	. Found	. Found	. Found	. Found	.	. Found	. Found	. Found	. Found	. Found	. Found	. Found	. Found	. Found	. Found	. Found	. Found	. Found	. Found	. Found	. Found	. Found	. Found	. Found	. Found	. Found
	High	[K].RAEFTVETR.[S]			0,0149878	0,000750615	16	P21333	Filamin-A OS=Homo sapiens OX=9606 GN=FLNA PE=1 SV=4	P21333 [301-309]	1	110857455	0	1.222	0.997640674721491	66.51	80.2	119.8	127.03	30.31	. Found	. Found	. Found	.	.	.	. Found	. Found	. Found	. Found	. Found	. Found	. Found	. Found	. Found	. Found	. Found	. Found	.	.	.	.	. Found	. Found	. Found	. Found	. Found	.	.
	High	[K].SADFVVEAIGDDVGTLGFSVEGPSQAK.[I]			0,000171196	0	30	P21333	Filamin-A OS=Homo sapiens OX=9606 GN=FLNA PE=1 SV=4	P21333 [594-620]	0	269530973	0	1.402	0.97619640388844	67.46	86.7	113.3	57.76	32.45	.	. Found	.	.	. Found	.	.	.	.	. Found	.	. Found	. Found	. Found	. Found	. Found	. Found	. Found	. Found	.	.	.	. Found	.	.	. Found	. Found	.	.
	High	[K].SPFEVYVDK.[S]			0,0116315	0,000750615	5	P21333	Filamin-A OS=Homo sapiens OX=9606 GN=FLNA PE=1 SV=4	P21333 [368-376]	0	108353570	1	1.281	0.999209963067217	85.56	81.3	118.7	85.24	44.38	. Found	. Found	. Found	. Found	. Found	. Found	.	.	. Found	. Found	. Found	. Found	. Found	. Found	. Found	. Found	. Found	. Found	. Found	. Found	. Found	. Found	. Found	.	. Found	. Found	. Found	. Found	. Found
	High	[K].SPFEVYVDKSQGDASK.[V]			0,000594665	0	12	P21333	Filamin-A OS=Homo sapiens OX=9606 GN=FLNA PE=1 SV=4	P21333 [368-383]	1	175683882	0	1.247	0.983458986076177	73.05	80.6	119.4	55.14	28.38	. Found	. Found	. Found	. Found	. Found	. Found	. Found	. Found	. Found	. Found	. Found	. Found	. Found	. Found	. Found	. Found	. Found	. Found	.	.	.	. Found	. Found	. Found	. Found	. Found	. Found	. Found	. Found
	High	[K].SPFSVAVSPSLDLSK.[I]			0,000215429	0	18	P21333	Filamin-A OS=Homo sapiens OX=9606 GN=FLNA PE=1 SV=4	P21333 [959-973]	0	153381590	0	1.681	0.81407802949728	93.00	72.5	127.5	116.58	51.95	. Found	. Found	. Found	.	.	.	.	.	.	. Found	. Found	. Found	. Found	. Found	. Found	. Found	. Found	. Found	.	.	.	. Found	. Found	. Found	. Found	. Found	. Found	.	. Found
	High	[K].SSFTVDCSK.[A]	1xCarbamidomethyl [C7]		0,0174632	0,000840285	24	P21333	Filamin-A OS=Homo sapiens OX=9606 GN=FLNA PE=1 SV=4	P21333 [2576-2584]	0	103045099	0	1.532	0.940196614154894	60.87	84.9	115.1	92.74	27.23	. Found	. Found	. Found	.	.	.	. Found	.	.	. Found	. Found	. Found	. Found	. Found	. Found	. Found	. Found	. Found	.	.	. Found	. Found	.	.	. Found	. Found	.	.	.
	High	[K].TGVAVNKPAEFTVDAK.[H]			5,2605E-05	0	56	P21333	Filamin-A OS=Homo sapiens OX=9606 GN=FLNA PE=1 SV=4	P21333 [685-700]	0	164687481	0	1.484	0.96009005712464	125.82	92.9	107.1	132.54	76.73	.	.	.	.	.	.	.	.	.	. Found	.	. Found	. Found	. Found	. Found	. Found	. Found	. Found	.	.	.	.	.	.	.	.	. Found	.	.
	High	[K].VAQPTITDNK.[D]			0,0145164	0,000750615	3	P21333	Filamin-A OS=Homo sapiens OX=9606 GN=FLNA PE=1 SV=4	P21333 [1815-1824]	0	108657896	0	0.277	0.0184237666412935	6.36	127.9	72.1	123.54	37.27	. Found	. Found	. Found	. Found	. Found	. Found	. Found	. Found	. Found	. Found	. Found	. Found	. Found	. Found	. Found	. Found	. Found	. Found	.	.	.	. Found	. Found	. Found	. Found	. Found	. Found	. Found	. Found
	High	[K].VAQPTITDNKDGTVTVR.[Y]			0,000588575	0	7	P21333	Filamin-A OS=Homo sapiens OX=9606 GN=FLNA PE=1 SV=4	P21333 [1815-1831]	1	181496067	0	0.599	0.406513690553066	48.74	83.0	117.0	155.50	66.79	. Found	. Found	. Found	. Found	. Found	.	. Found	. Found	. Found	. Found	. Found	. Found	. Found	. Found	. Found	. Found	. Found	. Found	.	. Found	. Found	. Found	. Found	. Found	. Found	. Found	. Found	.	. Found
	High	[K].VDVGKDQEFTVK.[S]			0,000536502	0	10	P21333	Filamin-A OS=Homo sapiens OX=9606 GN=FLNA PE=1 SV=4	P21333 [983-994]	1	136470562	0	0.868	0.751821550198597	87.41	99.5	100.5	138.31	31.01	. Found	. Found	. Found	.	.	. Found	. Found	. Found	. Found	. Found	. Found	. Found	. Found	. Found	. Found	. Found	. Found	. Found	.	.	.	. Found	. Found	. Found	. Found	. Found	. Found	.	. Found
	High	[K].VEYTPYEEGLHSVDVTYDGSPVPSSPFQVPVTEGCDPSR.[V]	1xCarbamidomethyl [C35]		0,123826	0,00422816	1	P21333	Filamin-A OS=Homo sapiens OX=9606 GN=FLNA PE=1 SV=4	P21333 [1319-1357]	0	429695539	0								. Found	. Found	. Found	. Found	. Found	. Found	. Found	. Found	. Found	. Found	. Found	. Found	. Found	. Found	. Found	. Found	. Found	. Found	. Found	. Found	. Found	. Found	. Found	. Found	. Found	. Found	. Found	. Found	. Found
	High	[K].VGSAADIPINISETDLSLLTATVVPPSGR.[E]			0,00183343	0	22	P21333	Filamin-A OS=Homo sapiens OX=9606 GN=FLNA PE=1 SV=4	P21333 [1965-1993]	0	289355169	0	1.574	0.942536892754606	89.90	78.8	121.2	106.93	60.11	.	. Found	. Found	.	. Found	.	.	.	.	. Found	. Found	. Found	. Found	. Found	. Found	. Found	. Found	. Found	.	.	.	. Found	. Found	. Found	. Found	. Found	. Found	. Found	. Found
	High	[K].VGSAADIPINISETDLSLLTATVVPPSGREEPCLLK.[R]	1xCarbamidomethyl [C33]		0,00641267	0,000591694	18	P21333	Filamin-A OS=Homo sapiens OX=9606 GN=FLNA PE=1 SV=4	P21333 [1965-2000]	1	376298338	0	0.951	0.97619640388844	54.51	108.3	91.7	45.07	57.35	. Found	. Found	. Found	. Found	.	.	.	.	.	. Found	. Found	. Found	. Found	. Found	. Found	. Found	. Found	. Found	. Found	. Found	. Found	. Found	. Found	. Found	. Found	. Found	. Found	.	.
	High	[K].VGSAADIPINISETDLSLLTATVVPPSGREEPCLLKR.[L]	1xCarbamidomethyl [C33]		9,99093E-05	0	9	P21333	Filamin-A OS=Homo sapiens OX=9606 GN=FLNA PE=1 SV=4	P21333 [1965-2001]	2	391908449	0	0.872	0.931734120262598	73.06	124.6	75.4	55.72	73.31	. Found	. Found	. Found	. Found	. Found	. Found	.	.	. Found	. Found	. Found	. Found	. Found	. Found	. Found	. Found	. Found	. Found	. Found	. Found	. Found	. Found	. Found	.	. Found	.	. Found	. Found	.
	High	[K].VHSPSGALEECYVTEIDQDK.[Y]	1xCarbamidomethyl [C11]		0,00218764	0,000313424	4	P21333	Filamin-A OS=Homo sapiens OX=9606 GN=FLNA PE=1 SV=4	P21333 [2368-2387]	0	227703397	0	0.847	0.931734120262598	50.35	91.4	108.6		47.03	. Found	. Found	. Found	. Found	. Found	. Found	. Found	. Found	. Found	. Found	. Found	. Found	. Found	. Found	. Found	. Found	. Found	. Found	.	.	. Found	. Found	. Found	. Found	. Found	. Found	. Found	. Found	. Found
	High	[K].VHSPSGALEECYVTEIDQDKYAVR.[F]	1xCarbamidomethyl [C11]		2,93139E-07	0	40	P21333	Filamin-A OS=Homo sapiens OX=9606 GN=FLNA PE=1 SV=4	P21333 [2368-2391]	1	276630393	0	1.683	0.834179884945177	97.01	73.1	126.9	107.68	52.47	. Found	. Found	.	.	.	.	.	.	.	. Found	.	.	. Found	. Found	. Found	. Found	. Found	. Found	. Found	.	.	.	.	.	. Found	. Found	. Found	.	.
	High	[K].VKAEGPGLSR.[T]			0,0129369	0,000750615	25	P21333	Filamin-A OS=Homo sapiens OX=9606 GN=FLNA PE=1 SV=4	P21333 [875-884]	1	101357382	0	1.404	0.977134742088879	123.24	77.6	122.4	131.31	89.20	. Found	.	.	. Found	.	.	.	.	.	. Found	. Found	. Found	. Found	. Found	. Found	. Found	. Found	. Found	.	.	.	.	.	.	. Found	. Found	. Found	.	.
	High	[K].VKAFGPGLQGGSAGSPAR.[F]			0,0634512	0,00141145	1	P21333	Filamin-A OS=Homo sapiens OX=9606 GN=FLNA PE=1 SV=4	P21333 [1070-1087]	1	165688163	0	0.010	1.18764845605701E-16		200.0		91.58		. Found	. Found	. Found	. Found	. Found	. Found	. Found	. Found	. Found	. Found	. Found	. Found	. Found	. Found	. Found	. Found	. Found	. Found	.	. Found	. Found	. Found	. Found	. Found	. Found	. Found	. Found	. Found	. Found
	High	[K].VNQPASFAVSLNGAK.[G]			0,00979753	0,000750615	3	P21333	Filamin-A OS=Homo sapiens OX=9606 GN=FLNA PE=1 SV=4	P21333 [2347-2361]	0	150279617	0	0.768	0.832688183382445	62.54	76.4	123.6	106.74	50.39	. Found	. Found	. Found	. Found	. Found	. Found	. Found	. Found	. Found	. Found	. Found	. Found	. Found	. Found	. Found	. Found	. Found	. Found	.	.	.	. Found	. Found	. Found	. Found	. Found	. Found	. Found	. Found
	High	[K].VPVHDVTDASK.[V]			0,000255735	0	33	P21333	Filamin-A OS=Homo sapiens OX=9606 GN=FLNA PE=1 SV=4	P21333 [1440-1450]	0	116760043	0	0.537	0.112347646272108	38.67	98.0	102.0	135.70	100.37	. Found	. Found	. Found	.	.	.	.	.	.	. Found	. Found	. Found	. Found	. Found	. Found	. Found	. Found	. Found	.	.	.	.	.	.	. Found	. Found	. Found	.	.
	High	[K].VTAQGPGLEPSGNIANK.[T]			0,00012401	0	30	P21333	Filamin-A OS=Homo sapiens OX=9606 GN=FLNA PE=1 SV=4	P21333 [384-400]	0	165286022	0	1.435	0.964369058686853	119.03	64.9	135.1	153.50	20.92	. Found	.	.	.	.	.	.	. Found	. Found	. Found	. Found	. Found	. Found	. Found	. Found	. Found	. Found	. Found	.	.	.	.	.	.	. Found	. Found	. Found	.	.
	High	[K].VTVLFAGQHIAK.[S]			0,00142463	0	50	P21333	Filamin-A OS=Homo sapiens OX=9606 GN=FLNA PE=1 SV=4	P21333 [356-367]	0	128374703	0	1.324	0.99442888849185	125.27	101.3	98.7	146.55	91.77	. Found	.	.	.	.	.	.	.	.	. Found	. Found	. Found	. Found	. Found	. Found	. Found	. Found	. Found	.	.	.	.	.	.	. Found	. Found	. Found	.	.
	High	[K].VYGPGVAK.[T]			0,0723249	0,00158954	16	P21333	Filamin-A OS=Homo sapiens OX=9606 GN=FLNA PE=1 SV=4	P21333 [774-781]	0	79044577	0	1.075	0.968093602891856	106.50	88.3	111.7	139.27	57.37	. Found	. Found	. Found	. Found	. Found	. Found	. Found	. Found	.	. Found	. Found	. Found	. Found	. Found	. Found	. Found	. Found	. Found	. Found	.	.	.	.	.	. Found	. Found	. Found	.	.
	High	[K].WGDEHIPGSPYR.[V]			0,00427694	0,000313424	11	P21333	Filamin-A OS=Homo sapiens OX=9606 GN=FLNA PE=1 SV=4	P21333 [2632-2643]	0	141365459	0	1.207	0.999209963067217	86.26	88.3	111.7	90.87	44.51	. Found	. Found	. Found	. Found	. Found	.	. Found	.	. Found	. Found	. Found	. Found	. Found	. Found	. Found	. Found	. Found	. Found	.	.	.	. Found	.	. Found	. Found	. Found	.	. Found	.
	High	[K].YGGDEIPFSPYR.[V]			0,00135677	0	22	P21333	Filamin-A OS=Homo sapiens OX=9606 GN=FLNA PE=1 SV=4	P21333 [1622-1633]	0	140064811	0	1.231	0.999209963067217	90.46	104.6	95.4	67.34	91.66	. Found	. Found	. Found	.	.	.	. Found	.	. Found	. Found	. Found	. Found	. Found	. Found	. Found	. Found	. Found	. Found	.	.	.	.	.	.	. Found	. Found	. Found	.	.
	High	[K].YGGPYHIGGSPFK.[A]			9,07598E-05	0	6	P21333	Filamin-A OS=Homo sapiens OX=9606 GN=FLNA PE=1 SV=4	P21333 [2501-2513]	0	137967426	0	1.132	0.977134742088879	101.18	94.9	105.1	117.94	64.90	. Found	. Found	. Found	. Found	. Found	. Found	. Found	. Found	. Found	. Found	. Found	. Found	. Found	. Found	. Found	. Found	. Found	. Found	.	.	.	. Found	. Found	. Found	. Found	. Found	. Found	.	. Found
	High	[K].YGGQPVPNFPSK.[L]			0,00525958	0,000313424	14	P21333	Filamin-A OS=Homo sapiens OX=9606 GN=FLNA PE=1 SV=4	P21333 [1235-1246]	0	129064771	1	1.641	0.870287151241783	72.08	79.0	121.0	61.77	19.45	. Found	. Found	. Found	. Found	. Found	.	. Found	. Found	. Found	. Found	. Found	. Found	. Found	. Found	. Found	. Found	. Found	. Found	. Found	. Found	.	. Found	. Found	. Found	. Found	. Found	. Found	.	.
	High	[K].YNEQHVPGSPFTAR.[V]			0,000555226	0	47	P21333	Filamin-A OS=Homo sapiens OX=9606 GN=FLNA PE=1 SV=4	P21333 [1938-1951]	0	160276593	0	1.209	0.996290224812264	103.24	81.9	118.1	123.12	67.96	. Found	.	.	.	.	.	.	.	.	.	.	. Found	. Found	. Found	.	. Found	. Found	. Found	.	.	.	.	.	.	.	.	.	.	.
	High	[K].YTPVQQGPVGVNVTYGGDPIPK.[S]			1,86864E-06	0	30	P21333	Filamin-A OS=Homo sapiens OX=9606 GN=FLNA PE=1 SV=4	P21333 [937-958]	0	228617647	0	0.482	0.034159369520074	22.24	81.6	118.4	128.29	64.90	. Found	. Found	. Found	. Found	. Found	. Found	.	. Found	.	. Found	. Found	. Found	. Found	. Found	. Found	. Found	. Found	. Found	.	.	.	.	.	.	. Found	. Found	. Found	.	.
	High	[R].AEAGVPAEFSIWTR.[E]			0,000715822	0	35	P21333	Filamin-A OS=Homo sapiens OX=9606 GN=FLNA PE=1 SV=4	P21333 [2251-2264]	0	153376962	0	1.124	0.977134742088879	111.14	79.9	120.1	114.09	71.64	. Found	. Found	. Found	.	. Found	.	.	.	.	.	.	.	. Found	. Found	. Found	. Found	. Found	. Found	.	.	.	.	.	.	.	.	.	.	.
	High	[R].AGGPGLER.[AG]			0,0523914	0,0010353	21	P21333	Filamin-A OS=Homo sapiens OX=9606 GN=FLNA PE=1 SV=4	P21333 [2243-2250]	0	75639988	0	1.388	0.97655192231143	92.23	69.6	130.4	110.39	43.65	. Found	. Found	. Found	.	.	.	. Found	.	.	. Found	. Found	. Found	. Found	. Found	. Found	. Found	. Found	. Found	.	.	.	. Found	.	. Found	. Found	. Found	. Found	.	.
	High	[R].AGQSAAGAAPGGGVDTR.[D]			0,00048737	0	3	P21333	Filamin-A OS=Homo sapiens OX=9606 GN=FLNA PE=1 SV=4	P21333 [8-24]	0	144269824	0	0.441	0.024680572496158	0.17	138.8	61.2			. Found	. Found	. Found	. Found	. Found	. Found	. Found	. Found	. Found	. Found	. Found	. Found	. Found	. Found	. Found	. Found	. Found	. Found	.	.	.	. Found	. Found	. Found	. Found	. Found	. Found	. Found	. Found
	High	[R].ALGALVDSCAPGLCPDWDSWDASKPVTNAR.[E]	2xCarbamidomethyl [C9; C14]		5,51039E-07	0	19	P21333	Filamin-A OS=Homo sapiens OX=9606 GN=FLNA PE=1 SV=4	P21333 [197-226]	0	322950411	0	0.010	1.18764845605701E-16		200.0		25.54		. Found	. Found	.	.	.	.	.	.	.	. Found	. Found	. Found	. Found	. Found	. Found	. Found	. Found	. Found	.	.	. Found	. Found	. Found	. Found	. Found	. Found	. Found	. Found	.
	High	[R].ALTQTGGPHVK.[A]			0,0106308	0,000750615	30	P21333	Filamin-A OS=Homo sapiens OX=9606 GN=FLNA PE=1 SV=4	P21333 [1284-1294]	0	110861093	0	0.756	0.473975017712492	82.57	159.2	40.8	143.23	119.03	.	. Found	.	.	.	.	.	.	.	. Found	. Found	.	. Found	. Found	. Found	. Found	. Found	. Found	.	.	.	. Found	.	.	. Found	. Found	. Found	.	.
	High	[R].ANLPQSFQVDTSK.[A]			0,00139513	0	27	P21333	Filamin-A OS=Homo sapiens OX=9606 GN=FLNA PE=1 SV=4	P21333 [1465-1477]	0	143472233	0	1.608	0.921646688612003	96.67	71.9	128.1	123.37	54.34	. Found	.	. Found	.	. Found	.	.	.	.	. Found	. Found	. Found	. Found	. Found	. Found	. Found	. Found	. Found	.	.	.	.	.	.	. Found	. Found	.	.	.
	High	[R].AWGPGLEGGVVGK.[S]			0,0306508	0,000840285	1	P21333	Filamin-A OS=Homo sapiens OX=9606 GN=FLNA PE=1 SV=4	P21333 [581-593]	0	122665280	0	1.983	0.664219178827903	120.95	56.8	143.2	117.66	52.16	. Found	. Found	. Found	. Found	. Found	. Found	. Found	. Found	. Found	. Found	. Found	. Found	. Found	. Found	. Found	. Found	. Found	. Found	.	. Found	. Found	. Found	. Found	. Found	. Found	. Found	. Found	. Found	. Found
	High	[R].AYGPGIEPTGNMVK.[K]	1xOxidation [M12]		0,00931698	0,000750615	3	P21333	Filamin-A OS=Homo sapiens OX=9606 GN=FLNA PE=1 SV=4	P21333 [286-299]	0	144970424	0	0.609	0.738721572742275	29.19	135.5	64.5	88.90	19.65	. Found	. Found	. Found	. Found	. Found	. Found	. Found	. Found	. Found	. Found	. Found	. Found	. Found	. Found	. Found	. Found	. Found	. Found	.	.	.	. Found	. Found	. Found	. Found	. Found	. Found	. Found	. Found
	High	[R].AYGPGIEPTGNMVK.[K]			0,000815774	0	15	P21333	Filamin-A OS=Homo sapiens OX=9606 GN=FLNA PE=1 SV=4	P21333 [286-299]	0	143370933	0	0.694	0.379535854255246	41.63	126.5	73.5	70.69	49.04	. Found	. Found	. Found	. Found	.	. Found	.	.	.	. Found	. Found	. Found	. Found	. Found	. Found	. Found	. Found	. Found	.	.	.	.	. Found	. Found	. Found	. Found	. Found	. Found	.
	High	[R].CSYQPTMEGVHTVHVTFAGVPIPR.[S]	1xCarbamidomethyl [C1]		0,000135114	0	11	P21333	Filamin-A OS=Homo sapiens OX=9606 GN=FLNA PE=1 SV=4	P21333 [444-467]	0	268331194	0	0.566	0.289622948988098	14.53	109.5	90.5	72.11	19.36	. Found	. Found	. Found	. Found	. Found	. Found	. Found	. Found	. Found	. Found	. Found	. Found	. Found	. Found	. Found	. Found	. Found	. Found	. Found	.	.	. Found	. Found	.	. Found	. Found	. Found	.	.
	High	[R].DAEMPATEKDLAEDAPWK.[K]			0,00184638	0	2	P21333	Filamin-A OS=Homo sapiens OX=9606 GN=FLNA PE=1 SV=4	P21333 [25-42]	1	201692190	0	0.640	0.736224303510468	14.32	123.6	76.4			. Found	. Found	. Found	. Found	. Found	. Found	. Found	. Found	. Found	. Found	. Found	. Found	. Found	. Found	. Found	. Found	. Found	. Found	. Found	.	.	. Found	. Found	. Found	. Found	. Found	. Found	. Found	. Found
	High	[R].DAEMPATEKDLAEDAPWKK.[I]			0,00339913	0,000313424	2	P21333	Filamin-A OS=Homo sapiens OX=9606 GN=FLNA PE=1 SV=4	P21333 [25-43]	2	214501686	0	0.010	1.18764845605701E-16		200.0				. Found	. Found	. Found	. Found	. Found	. Found	. Found	. Found	. Found	. Found	. Found	. Found	. Found	. Found	. Found	. Found	. Found	. Found	.	.	. Found	. Found	. Found	. Found	. Found	. Found	. Found	. Found	. Found
	High	[R].DAPQDFHPDR.[V]			0,00451941	0,000313424	16	P21333	Filamin-A OS=Homo sapiens OX=9606 GN=FLNA PE=1 SV=4	P21333 [665-674]	0	119752833	0	1.106	0.988984339489197	128.39	96.2	103.8	161.43	82.27	. Found	. Found	. Found	. Found	. Found	. Found	.	. Found	. Found	. Found	. Found	. Found	. Found	. Found	. Found	. Found	. Found	. Found	.	.	.	. Found	. Found	. Found	. Found	. Found	. Found	.	.
	High	[R].DVDIIDHHDNTYTVK.[Y]			0,000189751	0	30	P21333	Filamin-A OS=Homo sapiens OX=9606 GN=FLNA PE=1 SV=4	P21333 [922-936]	0	178484497	0	0.958	0.874416422065249	98.01	101.7	98.3	123.36	87.29	. Found	. Found	. Found	.	.	.	. Found	.	.	. Found	. Found	. Found	. Found	. Found	. Found	. Found	. Found	. Found	.	.	.	.	.	.	. Found	. Found	. Found	.	.
	High	[R].EAGAGGLAIAVEGPSK.[A]			0,000467716	0	2	P21333	Filamin-A OS=Homo sapiens OX=9606 GN=FLNA PE=1 SV=4	P21333 [2265-2280]	0	142675363	0	2.575	0.0747405596137691	119.97	52.3	147.7	107.20	85.83	. Found	. Found	. Found	. Found	. Found	. Found	. Found	. Found	. Found	. Found	. Found	. Found	. Found	. Found	. Found	. Found	. Found	. Found	. Found	. Found	.	. Found	. Found	. Found	. Found	. Found	. Found	. Found	. Found
	High	[R].EAGAGGLAIAVEGPSKAEISFEDR.[K]			4,66538E-05	0	17	P21333	Filamin-A OS=Homo sapiens OX=9606 GN=FLNA PE=1 SV=4	P21333 [2265-2288]	1	237418849	0	1.202	0.994806865988899	46.31	88.2	111.8	63.27	29.96	. Found	. Found	. Found	.	.	.	. Found	.	. Found	. Found	. Found	. Found	. Found	. Found	. Found	. Found	. Found	. Found	.	.	.	. Found	. Found	. Found	. Found	. Found	. Found	. Found	.
	High	[R].EAGAGGLAIAVEGPSKAEISFEDRK.[D]			1,36168E-05	0	8	P21333	Filamin-A OS=Homo sapiens OX=9606 GN=FLNA PE=1 SV=4	P21333 [2265-2289]	2	250228346	0	0.497	0.204607331177932	19.86	123.6	76.4	82.48	34.96	. Found	. Found	. Found	. Found	. Found	.	. Found	. Found	. Found	. Found	. Found	. Found	. Found	. Found	. Found	. Found	. Found	. Found	.	.	.	.	. Found	. Found	. Found	. Found	. Found	.	.
	High	[R].EATTEFSVDAR.[A]			0,00599347	0,000591694	23	P21333	Filamin-A OS=Homo sapiens OX=9606 GN=FLNA PE=1 SV=4	P21333 [1273-1283]	0	122556952	0	1.482	0.963092814450614	87.68	85.2	114.8	124.47	63.27	. Found	. Found	. Found	.	.	.	.	.	.	. Found	. Found	. Found	. Found	. Found	. Found	. Found	. Found	. Found	.	.	.	.	. Found	. Found	. Found	. Found	. Found	.	.
	High	[R].EEGPYEVEVTYDGVPVPGSPFPLEAVAPTKPSK.[V]			5,01385E-05	0	17	P21333	Filamin-A OS=Homo sapiens OX=9606 GN=FLNA PE=1 SV=4	P21333 [1037-1069]	0	348573626	0	1.634	0.917694217781163	74.78	67.0	133.0	71.88	21.67	. Found	. Found	.	.	. Found	.	.	. Found	.	. Found	. Found	. Found	. Found	. Found	. Found	. Found	. Found	. Found	. Found	. Found	. Found	. Found	.	. Found	. Found	. Found	. Found	.	.
	High	[R].EEPCLLKR.[L]	1xCarbamidomethyl [C4]		0,0666701	0,00158954	13	P21333	Filamin-A OS=Homo sapiens OX=9606 GN=FLNA PE=1 SV=4	P21333 [1994-2001]	1	104455064	0	1.090	0.999209963067217	123.01	96.5	103.5	144.64	70.79	. Found	. Found	. Found	.	.	. Found	. Found	. Found	. Found	. Found	. Found	. Found	. Found	. Found	. Found	. Found	. Found	. Found	.	.	.	. Found	. Found	. Found	. Found	. Found	. Found	. Found	.
	High	[R].EGPYSISVLYGDEEVPR.[S]			4,68141E-05	0	42	P21333	Filamin-A OS=Homo sapiens OX=9606 GN=FLNA PE=1 SV=4	P21333 [1516-1532]	0	190991780	0	0.912	0.870013900485371	92.06	96.4	103.6	113.54	49.81	.	.	.	.	.	.	.	.	.	.	.	.	. Found	. Found	. Found	. Found	. Found	. Found	.	.	.	.	.	.	.	.	.	.	.
	High	[R].ENGVYLIDVK.[F]			0,0404775	0,000840285	5	P21333	Filamin-A OS=Homo sapiens OX=9606 GN=FLNA PE=1 SV=4	P21333 [2396-2405]	0	114961502	0	1.029	0.999209963067217	88.91	88.5	111.5	75.32	48.13	. Found	. Found	.	. Found	.	. Found	. Found	. Found	. Found	. Found	. Found	. Found	. Found	. Found	. Found	. Found	. Found	. Found	. Found	.	.	. Found	. Found	. Found	. Found	. Found	. Found	. Found	. Found
	High	[R].FLPREEGPYEVEVTYDGVPVPGSPFPLEAVAPTKPSK.[V]			6,73422E-05	0	8	P21333	Filamin-A OS=Homo sapiens OX=9606 GN=FLNA PE=1 SV=4	P21333 [1033-1069]	1	399904261	0	1.352	0.99442888849185	40.78	89.1	110.9	22.48	20.02	. Found	. Found	. Found	.	.	. Found	. Found	. Found	.	. Found	. Found	. Found	. Found	. Found	. Found	. Found	. Found	. Found	. Found	. Found	.	. Found	. Found	. Found	. Found	. Found	. Found	. Found	. Found
	High	[R].FVPAEMGTHTVSVK.[Y]			0,000735779	0	6	P21333	Filamin-A OS=Homo sapiens OX=9606 GN=FLNA PE=1 SV=4	P21333 [2202-2215]	0	150276718	0	0.915	0.974874541096762	101.14	71.0	129.0	136.04	49.25	. Found	. Found	. Found	. Found	. Found	. Found	. Found	. Found	. Found	. Found	. Found	. Found	. Found	. Found	. Found	. Found	. Found	. Found	.	.	.	. Found	. Found	. Found	. Found	. Found	. Found	. Found	. Found
	High	[R].GAGSYTIMVLFADQATPTSPIR.[V]			1,93209E-05	0	38	P21333	Filamin-A OS=Homo sapiens OX=9606 GN=FLNA PE=1 SV=4	P21333 [842-863]	0	229616419	0	1.021	0.990981590338927	96.60	102.3	97.7	108.88	65.00	. Found	. Found	. Found	.	.	.	.	.	.	. Found	. Found	.	. Found	. Found	. Found	. Found	. Found	. Found	.	.	.	.	.	.	. Found	. Found	. Found	.	.
	High	[R].GAGTGGLGLAVEGPSEAK.[M]			2,15625E-05	0	40	P21333	Filamin-A OS=Homo sapiens OX=9606 GN=FLNA PE=1 SV=4	P21333 [1382-1399]	0	157080713	0	1.581	0.909863605903733	125.70	88.4	111.6	132.14	89.41	.	.	.	.	.	.	.	.	.	. Found	. Found	.	. Found	. Found	. Found	. Found	. Found	. Found	.	.	.	.	.	.	.	.	.	.	.
	High	[R].GDGMYKVEYTPYEEGLHSVDVTYDGSPVPSSPFQVPVTEGCDPSR.[V]	1xCarbamidomethyl [C41]		0,000120654	0	2	P21333	Filamin-A OS=Homo sapiens OX=9606 GN=FLNA PE=1 SV=4	P21333 [1313-1357]	1	494822403	0	1.948	0.674949170551305	74.90	67.8	132.2			. Found	. Found	. Found	. Found	. Found	. Found	. Found	. Found	. Found	. Found	. Found	. Found	. Found	. Found	. Found	. Found	. Found	. Found	. Found	. Found	. Found	. Found	. Found	. Found	. Found	. Found	. Found	.	.
	High	[R].IANLQTDLSDGLR.[L]			0,000764144	0	7	P21333	Filamin-A OS=Homo sapiens OX=9606 GN=FLNA PE=1 SV=4	P21333 [64-76]	0	141574888	0	1.466	0.964369058686853	118.11	65.9	134.1	156.19	68.47	. Found	. Found	. Found	. Found	. Found	. Found	. Found	. Found	. Found	. Found	. Found	. Found	. Found	. Found	. Found	. Found	. Found	. Found	.	. Found	. Found	.	.	.	. Found	. Found	. Found	. Found	. Found
	High	[R].KDGSCGVAYVVQEPGDYEVSVK.[F]	1xCarbamidomethyl [C5]		0,00176384	0	6	P21333	Filamin-A OS=Homo sapiens OX=9606 GN=FLNA PE=1 SV=4	P21333 [2289-2310]	1	238612312	0	0.758	0.930980694103987	30.78	95.0	105.0	54.17	41.95	. Found	. Found	. Found	. Found	.	. Found	. Found	. Found	. Found	. Found	. Found	. Found	. Found	. Found	. Found	. Found	. Found	. Found	. Found	.	.	. Found	. Found	. Found	. Found	. Found	. Found	.	.
	High	[R].LIALLEVLSQK.[KR]			0,001338	0	17	P21333	Filamin-A OS=Homo sapiens OX=9606 GN=FLNA PE=1 SV=4	P21333 [77-87]	0	122677185	0	1.069	0.994806865988899	103.08	110.1	89.9	98.92	78.65	. Found	. Found	. Found	.	.	. Found	.	.	.	. Found	. Found	. Found	. Found	. Found	. Found	. Found	. Found	. Found	. Found	.	.	. Found	. Found	. Found	. Found	. Found	. Found	.	. Found
	High	[R].LIALLEVLSQKK.[M]			0,000226027	0	32	P21333	Filamin-A OS=Homo sapiens OX=9606 GN=FLNA PE=1 SV=4	P21333 [77-88]	1	135486681	0	1.144	0.987093671297076	125.29	93.9	106.1	127.57	88.43	. Found	.	.	.	.	.	.	.	.	. Found	. Found	. Found	. Found	. Found	. Found	. Found	. Found	. Found	.	.	.	.	.	.	. Found	. Found	. Found	.	.
	High	[R].LLGWIQNK.[LIV]			0,0225918	0,000840285	26	P21333	Filamin-A OS=Homo sapiens OX=9606 GN=FLNA PE=1 SV=4	P21333 [172-179]	0	97156728	0	1.202	0.998870208090446	110.21	79.6	120.4	127.74	67.11	. Found	. Found	. Found	.	.	.	. Found	. Found	. Found	.	. Found	.	. Found	. Found	. Found	. Found	. Found	. Found	.	.	.	.	.	.	. Found	. Found	. Found	.	.
	High	[R].LLGWIQNKLPQLPITNFSR.[D]			0,0057949	0,000591694	12	P21333	Filamin-A OS=Homo sapiens OX=9606 GN=FLNA PE=1 SV=4	P21333 [172-190]	1	223827573	0	1.289	0.97619640388844	61.12	85.8	114.2	70.97	20.94	. Found	. Found	. Found	. Found	. Found	. Found	. Found	. Found	. Found	. Found	. Found	. Found	. Found	. Found	. Found	. Found	. Found	. Found	. Found	.	.	. Found	. Found	. Found	. Found	. Found	. Found	.	. Found
	High	[R].LSPFMADIR.[D]			0,0235457	0,000840285	8	P21333	Filamin-A OS=Homo sapiens OX=9606 GN=FLNA PE=1 SV=4	P21333 [656-664]	0	104954483	0	0.779	0.635785097561242	84.94	140.9	59.1	101.53	101.42	. Found	. Found	. Found	. Found	. Found	. Found	.	.	.	. Found	. Found	. Found	. Found	. Found	. Found	. Found	. Found	. Found	.	.	.	. Found	. Found	. Found	. Found	. Found	. Found	. Found	. Found
	High	[R].LTVSSLQESGLK.[V]	1xHNE [K12]	P21333 1xHNE [K2346]	0,0110973	0,000750615	1	P21333	Filamin-A OS=Homo sapiens OX=9606 GN=FLNA PE=1 SV=4	P21333 [2335-2346]	0	141781484	0	1.767	0.814083596775118	50.06	70.1	129.9	106.97		. Found	. Found	. Found	. Found	. Found	. Found	. Found	. Found	. Found	. Found	. Found	. Found	. Found	. Found	. Found	. Found	. Found	. Found	.	. Found	. Found	. Found	. Found	. Found	. Found	. Found	. Found	. Found	. Found
	High	[R].LVSNHSLHETSSVFVDSLTK.[A]			2,68804E-06	0	45	P21333	Filamin-A OS=Homo sapiens OX=9606 GN=FLNA PE=1 SV=4	P21333 [2521-2540]	0	220012444	0	1.291	0.999209963067217	107.43	80.0	120.0	101.55	83.51	. Found	. Found	. Found	.	.	.	.	.	.	.	. Found	.	. Found	. Found	. Found	. Found	. Found	. Found	.	.	.	.	.	.	. Found	.	. Found	.	.
	High	[R].LYSVSYLLK.[D]			0,00731993	0,000591694	35	P21333	Filamin-A OS=Homo sapiens OX=9606 GN=FLNA PE=1 SV=4	P21333 [2613-2621]	0	108562412	0	1.396	0.977134742088879	115.07	78.1	121.9	106.67	78.98	.	.	.	.	.	.	.	. Found	.	. Found	. Found	. Found	. Found	. Found	. Found	. Found	. Found	. Found	.	.	.	.	.	.	.	.	.	.	.
	High	[R].QMQLENVSVALEFLDR.[E]			0,174715	0,00633877	2	P21333	Filamin-A OS=Homo sapiens OX=9606 GN=FLNA PE=1 SV=4	P21333 [101-116]	0	189195822	0								. Found	. Found	. Found	. Found	.	. Found	. Found	. Found	. Found	. Found	. Found	. Found	. Found	. Found	. Found	. Found	. Found	. Found	.	. Found	. Found	. Found	. Found	. Found	. Found	. Found	. Found	. Found	. Found
	High	[R].QMQLENVSVALEFLDR.[E]	1xOxidation [M2]		0,000108111	0	4	P21333	Filamin-A OS=Homo sapiens OX=9606 GN=FLNA PE=1 SV=4	P21333 [101-116]	0	190795314	0	0.010	1.18764845605701E-16		200.0		89.10		. Found	. Found	. Found	. Found	. Found	. Found	. Found	. Found	. Found	. Found	. Found	. Found	. Found	. Found	. Found	. Found	. Found	. Found	. Found	.	.	. Found	. Found	. Found	. Found	. Found	. Found	. Found	. Found
	High	[R].QMQLENVSVALEFLDRESIK.[L]			2,18604E-05	0	23	P21333	Filamin-A OS=Homo sapiens OX=9606 GN=FLNA PE=1 SV=4	P21333 [101-120]	1	234921187	0	1.349	0.990662691154869	95.52	86.4	113.6	91.28	55.99	. Found	.	.	.	.	.	.	.	.	. Found	. Found	. Found	. Found	. Found	. Found	. Found	. Found	. Found	.	. Found	.	. Found	.	.	. Found	. Found	. Found	.	.
	High	[R].QMQLENVSVALEFLDRESIK.[L]	1xOxidation [M2]		0,000975974	0	4	P21333	Filamin-A OS=Homo sapiens OX=9606 GN=FLNA PE=1 SV=4	P21333 [101-120]	1	236520679	1	0.927	0.984270214801848	84.05	118.8	81.2	82.08	44.46	. Found	. Found	. Found	. Found	. Found	. Found	. Found	. Found	. Found	. Found	. Found	. Found	. Found	. Found	. Found	. Found	. Found	. Found	. Found	. Found	.	. Found	. Found	.	. Found	. Found	. Found	. Found	. Found
	High	[R].RLTVSSLQESGLK.[V]			0,0018078	0	11	P21333	Filamin-A OS=Homo sapiens OX=9606 GN=FLNA PE=1 SV=4	P21333 [2334-2346]	1	141780092	0	1.548	0.908940010185694	103.97	79.5	120.5	115.15	44.84	. Found	. Found	. Found	.	.	.	.	.	. Found	. Found	. Found	. Found	. Found	. Found	. Found	. Found	. Found	. Found	. Found	.	.	. Found	. Found	. Found	. Found	. Found	. Found	. Found	. Found
	High	[R].SAGQGEVLVYVEDPAGHQEEAK.[V]			2,86906E-06	0	15	P21333	Filamin-A OS=Homo sapiens OX=9606 GN=FLNA PE=1 SV=4	P21333 [310-331]	0	231309934	0	1.459	0.964369058686853	54.12	79.1	120.9	95.63	44.09	. Found	. Found	. Found	.	. Found	.	. Found	.	.	. Found	. Found	. Found	. Found	. Found	. Found	. Found	. Found	. Found	.	.	.	.	. Found	. Found	. Found	. Found	. Found	. Found	. Found
	High	[R].SPYTVTVGQACNPSACR.[A]	2xCarbamidomethyl [C11; C16]		1,44345E-05	0	20	P21333	Filamin-A OS=Homo sapiens OX=9606 GN=FLNA PE=1 SV=4	P21333 [468-484]	0	186784254	0	0.987	0.966092194561975	118.23	66.5	133.5	130.05	56.57	. Found	. Found	. Found	. Found	. Found	. Found	. Found	.	. Found	. Found	. Found	. Found	. Found	. Found	. Found	. Found	. Found	. Found	.	.	.	.	.	.	. Found	. Found	. Found	.	.
	High	[R].TFSVWYVPEVTGTHK.[V]			0,00034823	0	25	P21333	Filamin-A OS=Homo sapiens OX=9606 GN=FLNA PE=1 SV=4	P21333 [341-355]	0	175087990	0	1.524	0.9500492592737	74.75	81.0	119.0	106.97	34.79	. Found	.	. Found	.	. Found	.	. Found	.	. Found	. Found	. Found	. Found	. Found	. Found	. Found	. Found	. Found	. Found	.	.	.	.	.	. Found	. Found	. Found	. Found	.	.
	High	[R].TGVELGKPTHFTVNAK.[A]			8,16041E-05	0	43	P21333	Filamin-A OS=Homo sapiens OX=9606 GN=FLNA PE=1 SV=4	P21333 [885-900]	0	169891735	0	1.765	0.777574501083418	111.78	75.3	124.7	111.31	29.40	. Found	.	.	.	.	.	.	. Found	.	. Found	. Found	. Found	. Found	. Found	. Found	. Found	. Found	. Found	.	.	.	. Found	. Found	. Found	. Found	. Found	. Found	.	.
	High	[R].TPCEEILVK.[H]	1xCarbamidomethyl [C3]		0,00369523	0,000313424	15	P21333	Filamin-A OS=Homo sapiens OX=9606 GN=FLNA PE=1 SV=4	P21333 [2599-2607]	0	108856562	0	1.212	0.998019339144021	82.52	85.0	115.0	89.96	42.28	. Found	. Found	. Found	.	.	.	.	.	.	. Found	. Found	. Found	. Found	. Found	. Found	. Found	. Found	. Found	.	.	.	. Found	. Found	. Found	. Found	. Found	. Found	.	.
	High	[R].VANPSGNLTETYVQDR.[G]			7,77778E-05	0	14	P21333	Filamin-A OS=Homo sapiens OX=9606 GN=FLNA PE=1 SV=4	P21333 [1297-1312]	0	176385587	0	1.013	0.953537638200151	87.56	101.6	98.4	67.40	50.84	. Found	. Found	. Found	.	. Found	.	. Found	. Found	.	. Found	. Found	. Found	. Found	. Found	. Found	. Found	. Found	. Found	.	.	.	. Found	.	. Found	. Found	. Found	. Found	.	.
	High	[R].VGEPGHGGDPGLVSAYGAGLEGGVTGNPAEFVVNTSNAGAGALSVTIDGPSK.[V]			0,00103862	0	1	P21333	Filamin-A OS=Homo sapiens OX=9606 GN=FLNA PE=1 SV=4	P21333 [2420-2471]	0	480734456	0								. Found	. Found	. Found	. Found	. Found	. Found	. Found	. Found	. Found	. Found	. Found	. Found	. Found	. Found	. Found	. Found	. Found	. Found	. Found	. Found	.	. Found	. Found	. Found	. Found	. Found	. Found	. Found	. Found
	High	[R].VHGPGIQSGTTNKPNK.[F]			0,00298481	0,000313424	2	P21333	Filamin-A OS=Homo sapiens OX=9606 GN=FLNA PE=1 SV=4	P21333 [1360-1375]	0	163486089	0	1.194	0.978905817427007	118.00	109.8	90.2	64.77	110.63	. Found	. Found	. Found	. Found	. Found	. Found	. Found	. Found	. Found	. Found	. Found	. Found	. Found	. Found	. Found	. Found	. Found	. Found	. Found	. Found	. Found	. Found	. Found	. Found	. Found	. Found	. Found	. Found	.
	High	[R].VHGPGIQSGTTNKPNKFTVETR.[G]			0,00886159	0,000750615	20	P21333	Filamin-A OS=Homo sapiens OX=9606 GN=FLNA PE=1 SV=4	P21333 [1360-1381]	1	236823678	0	1.027	0.994806865988899	69.40	94.7	105.3	68.76	30.84	. Found	. Found	. Found	.	.	. Found	.	.	.	. Found	. Found	. Found	. Found	. Found	. Found	. Found	. Found	. Found	. Found	.	.	. Found	. Found	. Found	. Found	. Found	. Found	. Found	.
	High	[R].VKETADFK.[V]			0,0417239	0,000840285	21	P21333	Filamin-A OS=Homo sapiens OX=9606 GN=FLNA PE=1 SV=4	P21333 [497-504]	1	93749892	0	1.658	0.877149928617634	127.01	67.8	132.2	103.39	83.70	. Found	. Found	. Found	. Found	.	.	. Found	.	.	. Found	. Found	. Found	. Found	. Found	. Found	. Found	. Found	. Found	.	.	.	. Found	. Found	.	. Found	. Found	. Found	.	.
	High	[R].VNVGAGSHPNK.[V]			0,0129882	0,000750615	1	P21333	Filamin-A OS=Homo sapiens OX=9606 GN=FLNA PE=1 SV=4	P21333 [761-771]	0	107955923	0								. Found	. Found	. Found	. Found	. Found	. Found	. Found	. Found	. Found	. Found	. Found	. Found	. Found	. Found	. Found	. Found	. Found	. Found	. Found	.	. Found	. Found	. Found	. Found	. Found	. Found	. Found	. Found	. Found
	High	[R].VQVQDNEGCPVEALVK.[D]	1xCarbamidomethyl [C9]		3,17715E-05	0	44	P21333	Filamin-A OS=Homo sapiens OX=9606 GN=FLNA PE=1 SV=4	P21333 [709-724]	0	178488472	0	1.466	0.964810501085697	125.74	97.5	102.5	130.42	86.51	.	.	.	.	. Found	.	. Found	.	.	.	.	.	. Found	. Found	. Found	. Found	. Found	. Found	.	.	.	.	.	.	. Found	. Found	. Found	.	.
	High	[R].VTGDDSMR.[M]			0,140241	0,00488789	3	P21333	Filamin-A OS=Homo sapiens OX=9606 GN=FLNA PE=1 SV=4	P21333 [1952-1959]	0	88038291	0	0.773	0.91172986404068	61.42	121.2	78.8	127.64	51.95	. Found	. Found	. Found	. Found	. Found	. Found	. Found	. Found	. Found	. Found	. Found	. Found	. Found	. Found	. Found	. Found	. Found	. Found	. Found	.	. Found	. Found	. Found	. Found	. Found	. Found	. Found	. Found	. Found
	High	[R].VTYTPMAPGSYLISIK.[Y]			0,00110156	0	4	P21333	Filamin-A OS=Homo sapiens OX=9606 GN=FLNA PE=1 SV=4	P21333 [2485-2500]	0	174092407	0	0.010	1.18764845605701E-16		200.0		40.28		. Found	. Found	. Found	.	. Found	. Found	. Found	. Found	. Found	. Found	. Found	. Found	. Found	. Found	. Found	. Found	. Found	. Found	.	.	. Found	. Found	. Found	. Found	. Found	. Found	. Found	. Found	. Found
	High	[R].VTYTPMAPGSYLISIK.[Y]	1xOxidation [M6]		0,05933	0,00122162	2	P21333	Filamin-A OS=Homo sapiens OX=9606 GN=FLNA PE=1 SV=4	P21333 [2485-2500]	0	175691899	0	0.010	1.18764845605701E-16		200.0				. Found	. Found	. Found	. Found	. Found	. Found	. Found	. Found	. Found	. Found	. Found	. Found	. Found	. Found	. Found	. Found	. Found	. Found	. Found	.	.	. Found	. Found	. Found	. Found	. Found	. Found	. Found	. Found
	High	[R].WCNEHLK.[C]	1xCarbamidomethyl [C2]		0,139597	0,00488789	2	P21333	Filamin-A OS=Homo sapiens OX=9606 GN=FLNA PE=1 SV=4	P21333 [52-58]	0	98645126	0	2.573	0.183598634390754	101.08	42.5	157.5	135.71	29.06	. Found	. Found	. Found	. Found	. Found	. Found	. Found	. Found	. Found	. Found	. Found	. Found	. Found	. Found	. Found	. Found	. Found	. Found	. Found	.	.	. Found	. Found	. Found	. Found	. Found	. Found	. Found	. Found
	High	[R].YAPSEAGLHEMDIR.[Y]			0,000883041	0	15	P21333	Filamin-A OS=Homo sapiens OX=9606 GN=FLNA PE=1 SV=4	P21333 [1832-1845]	0	158874242	0	1.604	0.909586583765699	69.98	74.4	125.6	110.40	28.63	. Found	. Found	. Found	. Found	.	.	.	.	.	. Found	. Found	. Found	. Found	. Found	. Found	. Found	. Found	. Found	.	.	.	.	.	.	. Found	. Found	. Found	. Found	. Found
	High	[R].YWPQEAGEYAVHVLCNSEDIR.[L]	1xCarbamidomethyl [C15]		5,85071E-05	0	20	P21333	Filamin-A OS=Homo sapiens OX=9606 GN=FLNA PE=1 SV=4	P21333 [635-655]	0	253615615	0	1.482	0.956649477206072	99.14	81.2	118.8	96.63	55.98	. Found	. Found	.	. Found	.	. Found	.	.	.	. Found	. Found	. Found	. Found	. Found	. Found	. Found	. Found	. Found	.	.	.	. Found	. Found	. Found	. Found	. Found	. Found	. Found	. Found
High	Master Protein	P01024	Complement C3 OS=Homo sapiens OX=9606 GN=C3 PE=1 SV=2	75	114	3976	114	1663	187,0	6,40	1.163	0.22	0.845326	.	.	.	.	.	.	.	.	.	.	.	.	.	.	.	.	.	.	.	.	.	.	.	.	.	.	.	.	.	.	.	.	.	.	.	.
	Confidence	Annotated Sequence	Modifications	Modifications in Master Proteins	Qvality PEP	Qvality q-value	# PSMs	Master Protein Accessions	Master Protein Descriptions	Positions in Master Proteins	# Missed Cleavages	Theo. MH+ [Da]	# Razor Quan Results	Abundance Ratio: (HDL) / (Control)	Abundance Ratio Adj. P-Value: (HDL) / (Control)	Abundance Ratio Variability [%]: (HDL) / (Control)	Abundances (Grouped): Control	Abundances (Grouped): HDL	Abundances (Grouped) CV [%]: Control	Abundances (Grouped) CV [%]: HDL	Found in Sample: [S2] F2: Sample, C7, Control, Replicate 1	Found in Sample: [S3] F3: Sample, C7, Control, Replicate 2	Found in Sample: [S4] F4: Sample, C7, Control, Replicate 3	Found in Sample: [S5] F5: Sample, C9, Control, Replicate 1	Found in Sample: [S6] F6: Sample, C9, Control, Replicate 2	Found in Sample: [S7] F7: Sample, C9, Control, Replicate 3	Found in Sample: [S8] F8: Sample, C10, Control, Replicate 1	Found in Sample: [S9] F9: Sample, C10, Control, Replicate 2	Found in Sample: [S10] F10: Sample, C10, Control, Replicate 3	Found in Sample: [S20] F20: Sample, C5, Control, Replicate 1	Found in Sample: [S21] F21: Sample, C5, Control, Replicate 2	Found in Sample: [S22] F22: Sample, C5, Control, Replicate 3	Found in Sample: [S23] F23: Sample, C6, Control, Replicate 1	Found in Sample: [S24] F24: Sample, C6, Control, Replicate 2	Found in Sample: [S25] F25: Sample, C6, Control, Replicate 3	Found in Sample: [S26] F26: Sample, C8, Control, Replicate 1	Found in Sample: [S27] F27: Sample, C8, Control, Replicate 2	Found in Sample: [S28] F28: Sample, C8, Control, Replicate 3	Found in Sample: [S38] F38: Sample, C1, Control, Replicate 1	Found in Sample: [S39] F39: Sample, C1, Control, Replicate 2	Found in Sample: [S40] F40: Sample, C1, Control, Replicate 3	Found in Sample: [S41] F41: Sample, C4, Control, Replicate 1	Found in Sample: [S42] F42: Sample, C4, Control, Replicate 2	Found in Sample: [S43] F43: Sample, C4, Control, Replicate 3	Found in Sample: [S11] F11: Sample, H1, HDL, Replicate 1	Found in Sample: [S12] F12: Sample, H1, HDL, Replicate 2	Found in Sample: [S13] F13: Sample, H1, HDL, Replicate 3	Found in Sample: [S14] F14: Sample, H2, HDL, Replicate 1	Found in Sample: [S15] F15: Sample, H2, HDL, Replicate 2
	High	[K].AAVYHHFISDGVR.[K]			0,000703627	0	65	P01024	Complement C3 OS=Homo sapiens OX=9606 GN=C3 PE=1 SV=2	P01024 [914-926]	0	147174407	0	1.182	0.994806865988899	67.03	89.4	110.6	48.58	51.04	. Found	.	.	.	.	.	. Found	. Found	.	.	.	.	.	.	.	.	.	.	. Found	.	.	.	.	.	.	.	.	.	.
	High	[K].AAVYHHFISDGVRK.[S]			0,0119557	0,000750615	15	P01024	Complement C3 OS=Homo sapiens OX=9606 GN=C3 PE=1 SV=2	P01024 [914-927]	1	159983904	0	1.443	0.956084375177942	42.82	83.0	117.0	28.75	35.79	. Found	. Found	. Found	. Found	. Found	. Found	. Found	. Found	. Found	.	. Found	. Found	. Found	.	.	.	.	.	. Found	. Found	. Found	. Found	. Found	. Found	. Found	. Found	. Found	. Found	. Found
	High	[K].ACEPGVDYVYK.[T]	1xCarbamidomethyl [C2]		0,0264555	0,000840285	37	P01024	Complement C3 OS=Homo sapiens OX=9606 GN=C3 PE=1 SV=2	P01024 [1536-1546]	0	130058781	0	3.628	0.0118637274091553	36.90	43.2	156.8	34.16		.	.	.	.	.	.	.	.	. Found	.	.	.	. Found	. Found	. Found	.	.	.	.	.	.	.	. Found	. Found	.	. Found	. Found	.	.
	High	[K].ADIGCTPGSGK.[D]	1xCarbamidomethyl [C5]		0,0117231	0,000750615	1	P01024	Complement C3 OS=Homo sapiens OX=9606 GN=C3 PE=1 SV=2	P01024 [623-633]	0	106248843	0	0.010	1.18764845605701E-16		200.0				. Found	. Found	. Found	. Found	. Found	. Found	. Found	. Found	. Found	. Found	. Found	. Found	. Found	. Found	. Found	. Found	. Found	. Found	. Found	. Found	.	. Found	. Found	. Found	. Found	. Found	. Found	. Found	. Found
	High	[K].ADIGCTPGSGKDYAGVFSDAGLTFTSSSGQQTAQR.[A]	1xCarbamidomethyl [C5]		0,000135114	0	68	P01024	Complement C3 OS=Homo sapiens OX=9606 GN=C3 PE=1 SV=2	P01024 [623-657]	1	353761868	0	1.226	0.999850434146449	61.62	92.2	107.8	35.52	37.98	.	.	.	.	.	.	.	. Found	.	.	.	.	.	.	.	.	.	. Found	.	.	.	.	.	.	.	.	.	.	.
	High	[K].AGDFLEANYMNLQR.[S]	1xOxidation [M10]		0,0848493	0,00250817	2	P01024	Complement C3 OS=Homo sapiens OX=9606 GN=C3 PE=1 SV=2	P01024 [1172-1185]	0	165776388	0								. Found	. Found	. Found	. Found	. Found	. Found	. Found	. Found	. Found	. Found	. Found	. Found	. Found	. Found	. Found	. Found	. Found	. Found	. Found	. Found	. Found	. Found	. Found	. Found	. Found	. Found	. Found	. Found	.
	High	[K].AGDFLEANYMNLQR.[S]			0,00143461	0	45	P01024	Complement C3 OS=Homo sapiens OX=9606 GN=C3 PE=1 SV=2	P01024 [1172-1185]	0	164176897	0	1.201	0.999850434146449	60.50	102.8	97.2	41.28	46.09	.	. Found	.	.	.	. Found	.	.	. Found	.	.	.	. Found	.	.	.	.	.	.	.	.	.	.	.	.	. Found	. Found	.	.
	High	[K].AKDQLTCNKFDLK.[V]	1xCarbamidomethyl [C7]		0,000266482	0	11	P01024	Complement C3 OS=Homo sapiens OX=9606 GN=C3 PE=1 SV=2	P01024 [1352-1364]	2	158081010	0	1.006	0.994806865988899	74.57	99.7	100.3	44.77	54.61	. Found	. Found	. Found	. Found	.	. Found	.	. Found	. Found	. Found	.	. Found	. Found	. Found	. Found	. Found	. Found	. Found	. Found	. Found	. Found	.	.	.	.	.	. Found	.	.
	High	[K].DAPDHQELNLDVSLQLPSR.[S]			0,000114996	0	35	P01024	Complement C3 OS=Homo sapiens OX=9606 GN=C3 PE=1 SV=2	P01024 [1285-1303]	0	214707274	0	1.494	0.943670552241055	90.84	91.9	108.1	55.73	68.78	. Found	.	. Found	.	. Found	.	. Found	. Found	. Found	.	.	.	.	.	.	.	.	.	.	.	.	.	.	.	. Found	.	. Found	.	.
	High	[K].DFDFVPPVVR.[W]			0,028054	0,000840285	17	P01024	Complement C3 OS=Homo sapiens OX=9606 GN=C3 PE=1 SV=2	P01024 [1245-1254]	0	119062044	0	0.627	0.632476149423012	27.34	116.4	83.6	61.46	19.10	. Found	. Found	.	.	. Found	.	. Found	. Found	. Found	. Found	. Found	. Found	. Found	. Found	. Found	. Found	. Found	. Found	.	.	.	.	.	.	. Found	. Found	. Found	. Found	. Found
	High	[K].DICEEQVNSLPGSITK.[A]	1xCarbamidomethyl [C3]		2,60396E-05	0	37	P01024	Complement C3 OS=Homo sapiens OX=9606 GN=C3 PE=1 SV=2	P01024 [1156-1171]	0	178986365	0	1.268	0.999850434146449	78.25	80.5	119.5	63.48	45.58	.	. Found	.	. Found	. Found	. Found	.	.	.	.	.	.	.	.	. Found	.	.	.	. Found	. Found	. Found	.	.	.	.	.	.	.	.
	High	[K].DMALTAFVLISLQEAK.[D]			0,00381839	0,000313424	15	P01024	Complement C3 OS=Homo sapiens OX=9606 GN=C3 PE=1 SV=2	P01024 [1140-1155]	0	174994553	0	1.400	0.930980694103987	80.25	80.8	119.2	75.75	54.66	. Found	. Found	. Found	. Found	.	.	. Found	. Found	. Found	.	.	.	. Found	. Found	. Found	. Found	. Found	. Found	. Found	. Found	. Found	. Found	. Found	. Found	. Found	.	. Found	.	. Found
	High	[K].DSCVGSLVVK.[S]	1xCarbamidomethyl [C3]		0,0422707	0,000840285	37	P01024	Complement C3 OS=Homo sapiens OX=9606 GN=C3 PE=1 SV=2	P01024 [557-566]	0	106354522	0	1.370	0.983458986076177	69.51	84.8	115.2	69.55	45.80	. Found	. Found	. Found	.	. Found	.	. Found	. Found	. Found	.	. Found	.	.	.	.	.	.	. Found	.	.	.	.	.	.	.	.	.	.	.
	High	[K].DSITTWEILAVSMSDKK.[G]			0,000180235	0	24	P01024	Complement C3 OS=Homo sapiens OX=9606 GN=C3 PE=1 SV=2	P01024 [797-813]	1	192397320	0	1.118	0.990662691154869	65.14	102.9	97.1	44.44	47.50	. Found	. Found	. Found	.	.	.	.	.	.	. Found	. Found	. Found	.	.	.	. Found	. Found	. Found	.	.	.	.	.	.	.	.	.	.	.
	High	[K].EYVLPSFEVIVEPTEK.[F]			0,00048737	0	44	P01024	Complement C3 OS=Homo sapiens OX=9606 GN=C3 PE=1 SV=2	P01024 [226-241]	0	187897352	0	1.168	0.990981590338927	71.20	93.8	106.2	56.35	43.35	. Found	.	.	.	.	.	.	.	.	. Found	.	.	.	.	.	. Found	.	. Found	.	.	.	.	.	.	.	.	.	.	. Found
	High	[K].FVTVQATFGTQVVEK.[V]			0,000307777	0	10	P01024	Complement C3 OS=Homo sapiens OX=9606 GN=C3 PE=1 SV=2	P01024 [105-119]	0	165388465	0	2.846	0.24192963289184	26.21	79.4	120.6	7.96	86.88	. Found	. Found	. Found	. Found	. Found	. Found	. Found	. Found	. Found	. Found	. Found	.	. Found	. Found	. Found	. Found	. Found	. Found	. Found	. Found	.	. Found	.	.	.	.	.	. Found	. Found
	High	[K].FYYIYNEK.[G]			0,0634512	0,00141145	47	P01024	Complement C3 OS=Homo sapiens OX=9606 GN=C3 PE=1 SV=2	P01024 [242-249]	0	113954079	0	1.017	0.940196614154894	70.52	112.8	87.2	38.28	52.94	.	.	.	.	.	.	.	.	.	.	.	.	.	.	.	.	.	.	.	.	.	.	.	.	.	.	.	.	.
	High	[K].GICVADPFEVTVMQDFFIDLR.[L]	1xCarbamidomethyl [C3]		0,0303926	0,000840285	4	P01024	Complement C3 OS=Homo sapiens OX=9606 GN=C3 PE=1 SV=2	P01024 [814-834]	0	247219378	0	100.000	1.18764845605701E-16			200.0		57.19	. Found	. Found	. Found	. Found	. Found	. Found	. Found	. Found	. Found	. Found	. Found	. Found	. Found	. Found	. Found	. Found	. Found	. Found	. Found	. Found	. Found	. Found	. Found	. Found	. Found	. Found	. Found	. Found	.
	High	[K].GLEVTITAR.[F]			0,0392714	0,000840285	9	P01024	Complement C3 OS=Homo sapiens OX=9606 GN=C3 PE=1 SV=2	P01024 [250-258]	0	95955202	0	1.199	0.998528233175457	78.96	93.3	106.7	46.34	64.78	. Found	. Found	. Found	. Found	. Found	. Found	. Found	. Found	. Found	. Found	. Found	. Found	. Found	. Found	. Found	. Found	. Found	. Found	. Found	.	.	.	.	.	. Found	.	. Found	.	.
	High	[K].GQGTLSVVTMYHAK.[A]			0,000306723	0	91	P01024	Complement C3 OS=Homo sapiens OX=9606 GN=C3 PE=1 SV=2	P01024 [1338-1351]	0	149176242	0	1.042	0.96310891994116	55.09	105.1	94.9	26.83	38.64	.	.	.	.	.	.	.	.	.	.	.	.	.	.	.	.	.	.	.	.	.	.	.	.	.	.	.	.	.
	High	[K].GQGTLSVVTMYHAK.[A]	1xOxidation [M10]		0,00760362	0,000750615	4	P01024	Complement C3 OS=Homo sapiens OX=9606 GN=C3 PE=1 SV=2	P01024 [1338-1351]	0	150775734	0	0.992	0.983306306909598	71.08	94.3	105.7	29.42	63.39	. Found	. Found	. Found	. Found	. Found	. Found	. Found	. Found	. Found	. Found	. Found	. Found	. Found	. Found	. Found	. Found	. Found	. Found	.	. Found	. Found	.	. Found	. Found	. Found	. Found	. Found	. Found	. Found
	High	[K].GYTQQLAFR.[Q]			0,0519305	0,0010353	47	P01024	Complement C3 OS=Homo sapiens OX=9606 GN=C3 PE=1 SV=2	P01024 [1052-1060]	0	108355817	0	1.259	0.999850434146449	60.32	91.0	109.0	42.15	27.20	.	.	.	.	.	. Found	.	.	.	.	.	.	.	.	.	.	. Found	.	.	.	.	.	.	.	.	.	.	.	. Found
	High	[K].IRYYTYLIMNK.[G]			0,0227792	0,000840285	74	P01024	Complement C3 OS=Homo sapiens OX=9606 GN=C3 PE=1 SV=2	P01024 [487-497]	1	147778718	0	0.994	0.945985456493626	62.52	100.9	99.1	21.32	53.87	.	.	.	.	.	.	.	.	.	.	.	.	.	.	.	.	.	.	.	.	.	. Found	.	.	.	.	.	.	.
	High	[K].IWDVVEK.[A]			0,138318	0,00488789	3	P01024	Complement C3 OS=Homo sapiens OX=9606 GN=C3 PE=1 SV=2	P01024 [616-622]	0	88848254	0	1.245	0.999209963067217	48.64	88.0	112.0	30.72	33.85	. Found	. Found	. Found	. Found	. Found	. Found	.	.	. Found	. Found	. Found	. Found	. Found	. Found	. Found	. Found	. Found	. Found	.	. Found	. Found	. Found	. Found	. Found	. Found	. Found	. Found	. Found	. Found
	High	[K].KGICVADPFEVTVMQDFFIDLR.[L]	1xCarbamidomethyl [C4]		0,00271881	0,000313424	1	P01024	Complement C3 OS=Homo sapiens OX=9606 GN=C3 PE=1 SV=2	P01024 [813-834]	1	260028874	0	0.344	0.147075237223013	8.98	149.9	50.1		64.60	. Found	. Found	. Found	. Found	. Found	. Found	. Found	. Found	. Found	. Found	. Found	. Found	. Found	. Found	. Found	. Found	. Found	. Found	. Found	. Found	. Found	. Found	. Found	. Found	. Found	. Found	. Found	. Found	.
	High	[K].KGYTQQLAFR.[Q]			0,000480728	0	96	P01024	Complement C3 OS=Homo sapiens OX=9606 GN=C3 PE=1 SV=2	P01024 [1051-1060]	1	121165313	0	1.283	0.994806865988899	55.07	89.7	110.3	57.66	32.08	.	.	.	.	.	.	.	.	.	.	.	.	.	.	.	.	.	.	.	.	.	.	.	.	.	.	.	.	.
	High	[K].KQELSEAEQATR.[T]			0,000237961	0	51	P01024	Complement C3 OS=Homo sapiens OX=9606 GN=C3 PE=1 SV=2	P01024 [428-439]	1	138969685	0	1.108	0.98039981659082	99.01	99.1	100.9	74.76	72.32	.	.	.	.	.	.	. Found	.	.	. Found	. Found	. Found	. Found	. Found	.	.	.	.	.	.	.	.	.	.	.	. Found	.	.	.
	High	[K].KVEGTAFVIFGIQDGEQR.[I]			8,51105E-06	0	54	P01024	Complement C3 OS=Homo sapiens OX=9606 GN=C3 PE=1 SV=2	P01024 [264-281]	1	199403417	0	1.071	0.965103206330036	55.89	103.7	96.3	41.08	37.16	.	.	.	.	.	.	. Found	. Found	. Found	.	.	.	.	.	.	.	.	.	. Found	.	.	.	.	.	.	.	.	.	.
[truncated: 5,915 more rows]
[truncated: 31 more columns]

## Sheet: Control (at least 5 of 8)
306 proteins in at least 5 of 8 "Control" samples
[truncated: 307 more rows]
[truncated: 12 more columns]

## Sheet: H (at least 6 of 9)
304 proteins in at least 6 of 9 "H" samples
[truncated: 305 more rows]
[truncated: 19 more columns]

[truncated: 5 more sheets: Uniques proteins, Control (5 of 8) + H (6 of 9),  Prot. present in all samples, Peptides PValue<0.01 , Peptides  0.05<PValue<0.01 ]
