# Supplementary material for: Proteomic Characterization of High-Density Lipoprotein Particles from Non-Diabetic Hemodialysis Patients
Source: Toxins (Basel). 2019 Nov 15;11(11):671. doi: 10.3390/toxins11110671 (PMC6891510; doi:10.3390/toxins11110671)
Supplement: Supplementary file 1 [file toxins-11-00671-s001.zip › Supplementary_files_R1/Table S2.xlsx]

## Sheet: Protein list
		MADCAM1	Mucosal addressin cell adhesion molecule 1; Cell adhesion leukocyte receptor expressed by mucosal venules, helps to direct lymphocyte traffic into mucosal tissues including the Peyer patches and the intestinal lamina propria. It can bind both integrin alpha-4/beta-7 and L-selectin, regulating both the passage and retention of leukocytes. Isoform 2, lacking the mucin-like domain, may be specialize…
		APMAP	Adipocyte plasma membrane-associated protein; Exhibits strong arylesterase activity with beta-naphthyl acetate and phenyl acetate. May play a role in adipocyte differentiation; Belongs to the strictosidine synthase family (416 aa)
		IMPAD1	Inositol monophosphatase 3; May play a role in the formation of skeletal elements derived through endochondral ossification, possibly by clearing adenosine 3’,5’-bisphosphate produced by Golgi sulfotransferases during glycosaminoglycan sulfation (359 aa)
		PRDX1	Peroxiredoxin-1; Thiol-specific peroxidase that catalyzes the reduction of hydrogen peroxide and organic hydroperoxides to water and alcohols, respectively. Plays a role in cell protection against oxidative stress by detoxifying peroxides and as sensor of hydrogen peroxide-mediated signaling events. Might participate in the signaling cascades of growth factors and tumor necrosis factor-alpha by r…
		ACTR3	Actin-related protein 3; Functions as ATP-binding component of the Arp2/3 complex which is involved in regulation of actin polymerization and together with an activating nucleation-promoting factor (NPF) mediates the formation of branched actin networks. Seems to contact the pointed end of the daughter actin filament. Plays a role in ciliogenesis; Belongs to the actin family. ARP3 subfamily (418 …
		TUBB4A	Tubulin beta-4A chain; Tubulin is the major constituent of microtubules. It binds two moles of GTP, one at an exchangeable site on the beta chain and one at a non-exchangeable site on the alpha chain; Tubulins (444 aa)
		ARL6IP5	PRA1 family protein 3; Regulates intracellular concentrations of taurine and glutamate. Negatively modulates SLC1A1/EAAC1 glutamate transport activity by decreasing its affinity for glutamate in a PKC activity-dependent manner. May be involved in membrane traffic; YIP family (188 aa)
		IGF1	Insulin-like growth factor I; The insulin-like growth factors, isolated from plasma, are structurally and functionally related to insulin but have a much higher growth-promoting activity. May be a physiological regulator of [1-14C]-2-deoxy-D-glucose (2DG) transport and glycogen synthesis in osteoblasts. Stimulates glucose transport in bone-derived osteoblastic (PyMS) cells and is effective at muc…
		CALR	Calreticulin; Calcium-binding chaperone that promotes folding, oligomeric assembly and quality control in the endoplasmic reticulum (ER) via the calreticulin/calnexin cycle. This lectin interacts transiently with almost all of the monoglucosylated glycoproteins that are synthesized in the ER. Interacts with the DNA-binding domain of NR3C1 and mediates its nuclear export. Involved in maternal gene…
		TUBB	Tubulin beta chain; Tubulin is the major constituent of microtubules. It binds two moles of GTP, one at an exchangeable site on the beta chain and one at a non-exchangeable site on the alpha chain; Tubulins (444 aa)
		SPINK5	Serine protease inhibitor Kazal-type 5; Serine protease inhibitor, probably important for the anti-inflammatory and/or antimicrobial protection of mucous epithelia. Contribute to the integrity and protective barrier function of the skin by regulating the activity of defense- activating and desquamation-involved proteases. Inhibits KLK5, it’s major target, in a pH-dependent manner. Inhibits KLK7, …
		PRSS3	Trypsin-3; Digestive protease specialized for the degradation of trypsin inhibitors. In the ileum, may be involved in defensin processing, including DEFA5; Belongs to the peptidase S1 family (304 aa)
		LY6G6F	Lymphocyte antigen 6 complex locus protein G6f; May play a role in the downstream signal transduction pathways involving GRB2 and GRB7; LY6/PLAUR domain containing (297 aa)
		HSPD1	60 kDa heat shock protein, mitochondrial; Chaperonin implicated in mitochondrial protein import and macromolecular assembly. Together with Hsp10, facilitates the correct folding of imported proteins. May also prevent misfolding and promote the refolding and proper assembly of unfolded polypeptides generated under stress conditions in the mitochondrial matrix. The functional units of these chapero…
		CDC42	Cell division control protein 42 homolog; Plasma membrane-associated small GTPase which cycles between an active GTP-bound and an inactive GDP-bound state. In active state binds to a variety of effector proteins to regulate cellular responses. Involved in epithelial cell polarization processes. Regulates the bipolar attachment of spindle microtubules to kinetochores before chromosome congression …
		ITGA6	Integrin alpha-6; Integrin alpha-6/beta-1 is a receptor for laminin on platelets. Integrin alpha-6/beta-4 is a receptor for laminin in epithelial cells and it plays a critical structural role in the hemidesmosome (By similarity). ITGA6-ITGB4 binds to NRG1 (via EGF domain) and this binding is essential for NRG1-ERBB signaling. ITGA6-ITGB4 binds to IGF1 and this binding is essential for IGF1 signal…
		HK1	Hexokinase-1; Hexokinase 1 (921 aa)
		STXBP2	Syntaxin-binding protein 2; Involved in intracellular vesicle trafficking and vesicle fusion with membranes. Contributes to the granule exocytosis machinery through interaction with soluble N- ethylmaleimide-sensitive factor attachment protein receptor (SNARE) proteins that regulate membrane fusion. Regulates cytotoxic granule exocytosis in natural killer (NK) cells (604 aa)
		SPARCL1	SPARC-like protein 1; SPARC family (664 aa)
		CFB	Complement factor B; Factor B which is part of the alternate pathway of the complement system is cleaved by factor D into 2 fragments- Ba and Bb. Bb, a serine protease, then combines with complement factor 3b to generate the C3 or C5 convertase. It has also been implicated in proliferation and differentiation of preactivated B- lymphocytes, rapid spreading of peripheral blood monocytes, stimulati…
		CAPN1	Calpain-1 catalytic subunit; Calcium-regulated non-lysosomal thiol-protease which catalyzes limited proteolysis of substrates involved in cytoskeletal remodeling and signal transduction; Belongs to the peptidase C2 family (714 aa)
		MYL12B	Myosin regulatory light chain 12B; Myosin regulatory subunit that plays an important role in regulation of both smooth muscle and nonmuscle cell contractile activity via its phosphorylation. Phosphorylation triggers actin polymerization in vascular smooth muscle. Implicated in cytokinesis, receptor capping, and cell locomotion; EF-hand domain containing (172 aa)
		RPS5	Ribosomal protein S5; Belongs to the universal ribosomal protein uS7 family (204 aa)

## Sheet: GO process
enrichment.Process (38)
#term ID	term description	observed gene count	background gene count	false discovery rate	matching proteins in your network (IDs)	matching proteins in your network (labels)
GO:0002252	immune effector process	9	927	0.00082	ENSP00000262746,ENSP00000263238,ENSP00000339001,ENSP00000354280,ENSP00000373620,ENSP00000383118,ENSP00000413606,ENSP00000416561,ENSP00000431984	ACTR3,CAPN1,CDC42,CFB,HSPD1,PRDX1,PRSS3,STXBP2,TUBB
GO:0002376	immune system process	12	2370	0.0028	ENSP00000215637,ENSP00000262746,ENSP00000263238,ENSP00000320866,ENSP00000339001,ENSP00000354280,ENSP00000373620,ENSP00000383118,ENSP00000386896,ENSP00000413606,ENSP00000416561,ENSP00000431984	ACTR3,CALR,CAPN1,CDC42,CFB,HSPD1,ITGA6,MADCAM1,PRDX1,PRSS3,STXBP2,TUBB
GO:0002684	positive regulation of immune system process	8	882	0.0028	ENSP00000215637,ENSP00000263238,ENSP00000302665,ENSP00000320866,ENSP00000373620,ENSP00000383118,ENSP00000413606,ENSP00000416561	ACTR3,CALR,CDC42,CFB,HSPD1,IGF1,MADCAM1,STXBP2
GO:0001909	leukocyte mediated cytotoxicity	3	38	0.0054	ENSP00000262746,ENSP00000339001,ENSP00000413606	PRDX1,STXBP2,TUBB
GO:0002682	regulation of immune system process	9	1391	0.0054	ENSP00000215637,ENSP00000263238,ENSP00000302665,ENSP00000320866,ENSP00000352936,ENSP00000373620,ENSP00000383118,ENSP00000413606,ENSP00000416561	ACTR3,CALR,CDC42,CFB,HSPD1,IGF1,MADCAM1,SPINK5,STXBP2
GO:0051179	localization	16	5233	0.0055	ENSP00000215637,ENSP00000263238,ENSP00000264071,ENSP00000273258,ENSP00000302665,ENSP00000320866,ENSP00000339001,ENSP00000354280,ENSP00000364992,ENSP00000373620,ENSP00000383118,ENSP00000386896,ENSP00000402103,ENSP00000413606,ENSP00000431984,ENSP00000472985	ACTR3,ARL6IP5,CALR,CAPN1,CDC42,HK1,HSPD1,IGF1,ITGA6,LY6G6F,MADCAM1,PRSS3,RPS5,STXBP2,TUBB,TUBB4A
GO:0006955	immune response	9	1560	0.0081	ENSP00000215637,ENSP00000262746,ENSP00000263238,ENSP00000339001,ENSP00000354280,ENSP00000373620,ENSP00000413606,ENSP00000416561,ENSP00000431984	ACTR3,CAPN1,CFB,HSPD1,MADCAM1,PRDX1,PRSS3,STXBP2,TUBB
GO:0050776	regulation of immune response	7	873	0.0086	ENSP00000215637,ENSP00000263238,ENSP00000352936,ENSP00000373620,ENSP00000383118,ENSP00000413606,ENSP00000416561	ACTR3,CDC42,CFB,HSPD1,MADCAM1,SPINK5,STXBP2
GO:0002443	leukocyte mediated immunity	6	632	0.0110	ENSP00000262746,ENSP00000339001,ENSP00000354280,ENSP00000373620,ENSP00000413606,ENSP00000431984	CAPN1,HSPD1,PRDX1,PRSS3,STXBP2,TUBB
GO:0016192	vesicle-mediated transport	9	1699	0.0110	ENSP00000263238,ENSP00000302665,ENSP00000320866,ENSP00000339001,ENSP00000354280,ENSP00000364992,ENSP00000383118,ENSP00000413606,ENSP00000431984	ACTR3,CALR,CAPN1,CDC42,IGF1,LY6G6F,PRSS3,STXBP2,TUBB
GO:0030155	regulation of cell adhesion	6	623	0.0110	ENSP00000302665,ENSP00000320866,ENSP00000352936,ENSP00000373620,ENSP00000383118,ENSP00000386896	CALR,CDC42,HSPD1,IGF1,ITGA6,SPINK5
GO:0045785	positive regulation of cell adhesion	5	375	0.0110	ENSP00000302665,ENSP00000320866,ENSP00000373620,ENSP00000383118,ENSP00000386896	CALR,CDC42,HSPD1,IGF1,ITGA6
GO:0051641	cellular localization	10	2180	0.0110	ENSP00000215637,ENSP00000263238,ENSP00000264071,ENSP00000320866,ENSP00000339001,ENSP00000373620,ENSP00000383118,ENSP00000402103,ENSP00000413606,ENSP00000472985	ACTR3,CALR,CDC42,HK1,HSPD1,MADCAM1,RPS5,STXBP2,TUBB,TUBB4A
GO:0001775	cell activation	7	1024	0.0118	ENSP00000262746,ENSP00000302665,ENSP00000339001,ENSP00000354280,ENSP00000373620,ENSP00000413606,ENSP00000431984	CAPN1,HSPD1,IGF1,PRDX1,PRSS3,STXBP2,TUBB
GO:0045055	regulated exocytosis	6	691	0.0118	ENSP00000302665,ENSP00000339001,ENSP00000354280,ENSP00000364992,ENSP00000413606,ENSP00000431984	CAPN1,IGF1,LY6G6F,PRSS3,STXBP2,TUBB
GO:0048583	regulation of response to stimulus	13	3882	0.0118	ENSP00000215637,ENSP00000262746,ENSP00000263238,ENSP00000273258,ENSP00000302665,ENSP00000320866,ENSP00000352936,ENSP00000373620,ENSP00000383118,ENSP00000386896,ENSP00000413606,ENSP00000416561,ENSP00000431984	ACTR3,ARL6IP5,CALR,CAPN1,CDC42,CFB,HSPD1,IGF1,ITGA6,MADCAM1,PRDX1,SPINK5,STXBP2
GO:0007229	integrin-mediated signaling pathway	3	84	0.0121	ENSP00000215637,ENSP00000383118,ENSP00000386896	CDC42,ITGA6,MADCAM1
GO:0022409	positive regulation of cell-cell adhesion	4	238	0.0136	ENSP00000302665,ENSP00000373620,ENSP00000383118,ENSP00000386896	CDC42,HSPD1,IGF1,ITGA6
GO:0002694	regulation of leukocyte activation	5	470	0.0148	ENSP00000302665,ENSP00000352936,ENSP00000373620,ENSP00000383118,ENSP00000413606	CDC42,HSPD1,IGF1,SPINK5,STXBP2
GO:0010811	positive regulation of cell-substrate adhesion	3	109	0.0196	ENSP00000320866,ENSP00000383118,ENSP00000386896	CALR,CDC42,ITGA6
GO:0051234	establishment of localization	13	4248	0.0196	ENSP00000263238,ENSP00000273258,ENSP00000302665,ENSP00000320866,ENSP00000339001,ENSP00000354280,ENSP00000364992,ENSP00000373620,ENSP00000383118,ENSP00000402103,ENSP00000413606,ENSP00000431984,ENSP00000472985	ACTR3,ARL6IP5,CALR,CAPN1,CDC42,HK1,HSPD1,IGF1,LY6G6F,PRSS3,RPS5,STXBP2,TUBB
GO:0050863	regulation of T cell activation	4	302	0.0250	ENSP00000302665,ENSP00000352936,ENSP00000373620,ENSP00000383118	CDC42,HSPD1,IGF1,SPINK5
GO:0002449	lymphocyte mediated immunity	3	127	0.0259	ENSP00000262746,ENSP00000339001,ENSP00000373620	HSPD1,PRDX1,TUBB
GO:0002576	platelet degranulation	3	129	0.0259	ENSP00000302665,ENSP00000364992,ENSP00000413606	IGF1,LY6G6F,STXBP2
GO:0042267	natural killer cell mediated cytotoxicity	2	26	0.0259	ENSP00000262746,ENSP00000339001	PRDX1,TUBB
GO:0045321	leukocyte activation	6	894	0.0259	ENSP00000262746,ENSP00000339001,ENSP00000354280,ENSP00000373620,ENSP00000413606,ENSP00000431984	CAPN1,HSPD1,PRDX1,PRSS3,STXBP2,TUBB
GO:0051640	organelle localization	5	574	0.0259	ENSP00000263238,ENSP00000264071,ENSP00000339001,ENSP00000383118,ENSP00000413606	ACTR3,CDC42,STXBP2,TUBB,TUBB4A
GO:0002366	leukocyte activation involved in immune response	5	616	0.0302	ENSP00000339001,ENSP00000354280,ENSP00000373620,ENSP00000413606,ENSP00000431984	CAPN1,HSPD1,PRSS3,STXBP2,TUBB
GO:1900026	positive regulation of substrate adhesion-dependent cell spreading	2	32	0.0303	ENSP00000320866,ENSP00000383118	CALR,CDC42
GO:0002697	regulation of immune effector process	4	362	0.0326	ENSP00000352936,ENSP00000373620,ENSP00000413606,ENSP00000416561	CFB,HSPD1,SPINK5,STXBP2
GO:0140056	organelle localization by membrane tethering	3	159	0.0336	ENSP00000264071,ENSP00000339001,ENSP00000413606	STXBP2,TUBB,TUBB4A
GO:0002253	activation of immune response	4	393	0.0370	ENSP00000263238,ENSP00000373620,ENSP00000383118,ENSP00000416561	ACTR3,CDC42,CFB,HSPD1
GO:0006810	transport	12	4130	0.0370	ENSP00000263238,ENSP00000273258,ENSP00000302665,ENSP00000320866,ENSP00000339001,ENSP00000354280,ENSP00000364992,ENSP00000373620,ENSP00000383118,ENSP00000413606,ENSP00000431984,ENSP00000472985	ACTR3,ARL6IP5,CALR,CAPN1,CDC42,HSPD1,IGF1,LY6G6F,PRSS3,RPS5,STXBP2,TUBB
GO:0010564	regulation of cell cycle process	5	684	0.0370	ENSP00000264071,ENSP00000302665,ENSP00000320866,ENSP00000339001,ENSP00000383118	CALR,CDC42,IGF1,TUBB,TUBB4A
GO:0043901	negative regulation of multi-organism process	3	173	0.0370	ENSP00000302665,ENSP00000320866,ENSP00000352936	CALR,IGF1,SPINK5
GO:0045087	innate immune response	5	676	0.0370	ENSP00000262746,ENSP00000263238,ENSP00000339001,ENSP00000413606,ENSP00000416561	ACTR3,CFB,PRDX1,STXBP2,TUBB
GO:0050821	protein stabilization	3	166	0.0370	ENSP00000302665,ENSP00000320866,ENSP00000373620	CALR,HSPD1,IGF1
GO:0120031	plasma membrane bounded cell projection assembly	4	413	0.0397	ENSP00000263238,ENSP00000264071,ENSP00000339001,ENSP00000386896	ACTR3,ITGA6,TUBB,TUBB4A
GO:0050870	positive regulation of T cell activation	3	193	0.0431	ENSP00000302665,ENSP00000373620,ENSP00000383118	CDC42,HSPD1,IGF1
GO:0051604	protein maturation	3	202	0.0474	ENSP00000320866,ENSP00000354280,ENSP00000373620	CALR,HSPD1,PRSS3
GO:0030335	positive regulation of cell migration	4	452	0.0481	ENSP00000215637,ENSP00000302665,ENSP00000320866,ENSP00000386896	CALR,IGF1,ITGA6,MADCAM1
