# Supplementary material for: Proteomic Characterization of High-Density Lipoprotein Particles from Non-Diabetic Hemodialysis Patients
Source: Toxins (Basel). 2019 Nov 15;11(11):671. doi: 10.3390/toxins11110671 (PMC6891510; doi:10.3390/toxins11110671)
Supplement: Supplementary file 1 [file toxins-11-00671-s001.zip › Supplementary_files_R1/Table S3.xlsx]

## Sheet: Feuil1
CHGA	Chromogranin-A; Pancreastatin- Strongly inhibits glucose induced insulin release from the pancreas; Belongs to the chromogranin/secretogranin protein family (457 aa)
SCGB1A1	Uteroglobin; Binds phosphatidylcholine, phosphatidylinositol, polychlorinated biphenyls (PCB) and weakly progesterone, potent inhibitor of phospholipase A2; Secretoglobins (91 aa)
CA2	Carbonic anhydrase 2; Essential for bone resorption and osteoclast differentiation (By similarity). Reversible hydration of carbon dioxide. Can hydrate cyanamide to urea. Involved in the regulation of fluid secretion into the anterior chamber of the eye. Contributes to intracellular pH regulation in the duodenal upper villous epithelium during proton-coupled peptide absorption. Stimulates the chl…
CSTB	Cystatin-B; This is an intracellular thiol proteinase inhibitor. Tightly binding reversible inhibitor of cathepsins L, H and B; Belongs to the cystatin family (98 aa)
PRDX3	Thioredoxin-dependent peroxide reductase, mitochondrial; Thiol-specific peroxidase that catalyzes the reduction of hydrogen peroxide and organic hydroperoxides to water and alcohols, respectively. Plays a role in cell protection against oxidative stress by detoxifying peroxides. Acts synergistically with MAP3K13 to regulate the activation of NF-kappa-B in the cytosol; Peroxiredoxins (256 aa)
TNNI3	Troponin I, cardiac muscle; Troponin I is the inhibitory subunit of troponin, the thin filament regulatory complex which confers calcium-sensitivity to striated muscle actomyosin ATPase activity (210 aa)
DMKN	Dermokine; May act as a soluble regulator of keratinocyte differentiation (476 aa)
CMTM5	CKLF like MARVEL transmembrane domain containing 5; Belongs to the chemokine-like factor family (223 aa)
GUCA2A	Guanylin; Endogenous activator of intestinal guanylate cyclase. It stimulates this enzyme through the same receptor binding region as the heat-stable enterotoxins; Belongs to the guanylin family (115 aa)
GM2A	Ganglioside GM2 activator; The large binding pocket can accommodate several single chain phospholipids and fatty acids, GM2A also exhibits some calcium-independent phospholipase activity (By similarity). Binds gangliosides and stimulates ganglioside GM2 degradation. It stimulates only the breakdown of ganglioside GM2 and glycolipid GA2 by beta-hexosaminidase A. It extracts single GM2 molecules fr…
S100A6	Protein S100-A6; May function as calcium sensor and modulator, contributing to cellular calcium signaling. May function by interacting with other proteins, such as TPR-containing proteins, and indirectly play a role in many physiological processes such as the reorganization of the actin cytoskeleton and in cell motility. Binds 2 calcium ions. Calcium binding is cooperative; EF-hand domain contain…
CRTAC1	Cartilage acidic protein 1 (661 aa)
PTGDS	Prostaglandin-H2 D-isomerase; Catalyzes the conversion of PGH2 to PGD2, a prostaglandin involved in smooth muscle contraction/relaxation and a potent inhibitor of platelet aggregation. Involved in a variety of CNS functions, such as sedation, NREM sleep and PGE2-induced allodynia, and may have an anti-apoptotic role in oligodendrocytes. Binds small non-substrate lipophilic molecules, including bi…
C6orf25	Megakaryocyte and platelet inhibitory receptor G6b; Inhibitory receptor that acts as a critical regulator of hematopoietic lineage differentiation, megakaryocyte function and platelet production. Inhibits platelet aggregation and activation by agonists such as ADP and collagen-related peptide. This regulation of megakaryocate function as well as platelet production ann activation is done through …
RDH11	Retinol dehydrogenase 11; Exhibits an oxidoreductive catalytic activity towards retinoids. Most efficient as an NADPH-dependent retinal reductase. Displays high activity towards 9-cis and all-trans-retinol. Also involved in the metabolism of short-chain aldehydes. No steroid dehydrogenase activity detected (318 aa)
SPP1	Osteopontin; Binds tightly to hydroxyapatite. Appears to form an integral part of the mineralized matrix. Probably important to cell-matrix interaction; Endogenous ligands (314 aa)
GGT1	Glutathione hydrolase 1 proenzyme; Cleaves the gamma-glutamyl bond of extracellular glutathione (gamma-Glu-Cys-Gly), glutathione conjugates, and other gamma-glutamyl compounds. The metabolism of glutathione releases free glutamate and the dipeptide cysteinyl-glycine, which is hydrolyzed to cysteine and glycine by dipeptidases. In the presence of high concentrations of dipeptides and some amino ac…
TREML1	Trem-like transcript 1 protein; Cell surface receptor that may play a role in the innate and adaptive immune response; V-set domain containing (311 aa)
KPRP	Keratinocyte proline rich protein (579 aa)
