# Supplementary material for: Proteomic Characterization of High-Density Lipoprotein Particles from Non-Diabetic Hemodialysis Patients
Source: Toxins (Basel). 2019 Nov 15;11(11):671. doi: 10.3390/toxins11110671 (PMC6891510; doi:10.3390/toxins11110671)
Supplement: Supplementary file 1 [file toxins-11-00671-s001.zip › Supplementary_files_R1/Table S4.xlsx]

## Sheet: Upreg proteins
#term ID	term description	observed gene count	background gene count	false discovery rate	matching proteins in your network (labels)
GO:0065007	biological regulation	36	11740	0.0052	A2M,AMBP,ANGPTL3,ANPEP,APOB,ARHGDIB,B2M,C4BPA,CD248,CFD,CST3,FABP1,FGA,FGG,FLG2,GIG25,GPR126,HLA-B,HSPB1,IGF2,IGFBP4,IGLL5,ITIH1,ITIH2,ITIH4,LCN2,LIMS1,LRG1,MMRN1,PLA2G7,PRAP1,PSAP,RBP4,SCGB3A1,SFTPB,UGGT1
GO:0050789	regulation of biological process	33	11116	0.0261	A2M,AMBP,ANGPTL3,ANPEP,APOB,ARHGDIB,B2M,C4BPA,CD248,CFD,CST3,FABP1,FGA,FGG,GIG25,GPR126,HLA-B,HSPB1,IGF2,IGFBP4,IGLL5,ITIH1,ITIH2,ITIH4,LCN2,LIMS1,LRG1,PLA2G7,PRAP1,PSAP,RBP4,SCGB3A1,UGGT1
GO:0050794	regulation of cellular process	32	10484	0.0224	A2M,AMBP,ANGPTL3,ANPEP,APOB,ARHGDIB,B2M,C4BPA,CD248,CST3,FABP1,FGA,FGG,GIG25,GPR126,HLA-B,HSPB1,IGF2,IGFBP4,IGLL5,ITIH1,ITIH2,ITIH4,LCN2,LIMS1,LRG1,PLA2G7,PRAP1,PSAP,RBP4,SCGB3A1,UGGT1
GO:0050896	response to stimulus	30	7824	0.00098	A2M,ANGPTL3,ANPEP,APOB,ARHGDIB,B2M,C4BPA,CFD,CST3,DCD,FABP1,FGA,FGG,FLG2,GIG25,GPR126,HLA-B,HSPB1,IGF2,IGFBP4,IGLL5,ITIH4,LCN2,LIMS1,LRG1,LYZ,MMRN1,PSAP,RBP4,UGGT1
GO:0051179	localization	28	5233	4.10e-06	A2M,AMBP,ANGPTL3,ANPEP,APOB,APOF,B2M,CD248,CFD,CST3,FABP1,FGA,FGG,FLG2,GIG25,HLA-B,HSPB1,IGF2,IGLL5,ITIH4,LCN2,LIMS1,LRG1,LY6G6F,LYZ,MMRN1,PSAP,RBP4
GO:0051234	establishment of localization	26	4248	1.96e-06	A2M,AMBP,ANPEP,APOB,APOF,B2M,CFD,CST3,FABP1,FGA,FGG,FLG2,GIG25,HLA-B,HSPB1,IGF2,IGLL5,ITIH4,LCN2,LIMS1,LRG1,LY6G6F,LYZ,MMRN1,PSAP,RBP4
GO:0006810	transport	25	4130	4.01e-06	A2M,AMBP,ANPEP,APOB,APOF,B2M,CFD,CST3,FABP1,FGA,FGG,FLG2,GIG25,HLA-B,HSPB1,IGF2,IGLL5,ITIH4,LCN2,LRG1,LY6G6F,LYZ,MMRN1,PSAP,RBP4
GO:0032501	multicellular organismal process	23	6507	0.0298	A2M,AMBP,ANGPTL3,ANPEP,APOB,ARHGDIB,B2M,CD248,CST3,FABP1,FGA,FGG,FLG2,GIG25,GPR126,IGF2,IGFBP4,KRT77,MMRN1,PLA2G7,PSAP,RBP4,SFTPB
GO:1901564	organonitrogen compound metabolic process	22	5281	0.0072	A2M,AMBP,ANPEP,APOB,B2M,C4BPA,CFD,CST3,DCD,FGA,FGG,IGF2,IGFBP4,IGLL5,ITIH1,ITIH2,ITIH4,LYZ,PLA2G7,PSAP,SFTPB,UGGT1
GO:0016192	vesicle-mediated transport	21	1699	1.19e-09	A2M,AMBP,ANPEP,APOB,B2M,CFD,CST3,FGA,FGG,FLG2,GIG25,HLA-B,IGF2,IGLL5,ITIH4,LCN2,LRG1,LY6G6F,LYZ,MMRN1,PSAP
GO:0048518	positive regulation of biological process	21	5459	0.0213	ANGPTL3,APOB,B2M,C4BPA,CD248,CFD,CST3,FABP1,FGA,FGG,HLA-B,HSPB1,IGF2,IGFBP4,IGLL5,LIMS1,LRG1,PLA2G7,PSAP,RBP4,SCGB3A1
GO:0048519	negative regulation of biological process	21	4953	0.0080	A2M,AMBP,ARHGDIB,B2M,C4BPA,CST3,FABP1,FGA,FGG,GIG25,HLA-B,HSPB1,IGF2,IGFBP4,ITIH1,ITIH2,ITIH4,LIMS1,PSAP,RBP4,SCGB3A1
GO:0048523	negative regulation of cellular process	20	4454	0.0060	A2M,AMBP,ARHGDIB,B2M,C4BPA,CST3,FABP1,FGA,FGG,GIG25,HSPB1,IGF2,IGFBP4,ITIH1,ITIH2,ITIH4,LIMS1,PSAP,RBP4,SCGB3A1
GO:0048583	regulation of response to stimulus	20	3882	0.0012	A2M,AMBP,ANGPTL3,APOB,ARHGDIB,B2M,C4BPA,CFD,FGA,FGG,HLA-B,HSPB1,IGF2,IGFBP4,IGLL5,LIMS1,LRG1,PLA2G7,PSAP,SCGB3A1
GO:0006950	response to stress	19	3267	0.00045	A2M,B2M,C4BPA,CFD,CST3,DCD,FABP1,FGA,FGG,GIG25,HLA-B,HSPB1,IGFBP4,IGLL5,ITIH4,LCN2,LYZ,MMRN1,UGGT1
GO:0002376	immune system process	18	2370	2.90e-05	ANPEP,APOB,B2M,C4BPA,CD248,CFD,CST3,DCD,FGA,FGG,FLG2,GIG25,HLA-B,IGLL5,LCN2,LRG1,LYZ,PSAP
GO:0045055	regulated exocytosis	18	691	2.01e-12	A2M,ANPEP,B2M,CFD,CST3,FGA,FGG,FLG2,GIG25,HLA-B,IGF2,ITIH4,LCN2,LRG1,LY6G6F,LYZ,MMRN1,PSAP
GO:0019538	protein metabolic process	18	4194	0.0183	A2M,AMBP,ANPEP,APOB,B2M,C4BPA,CFD,CST3,DCD,FGA,FGG,IGF2,IGFBP4,IGLL5,ITIH2,LYZ,SFTPB,UGGT1
GO:0065009	regulation of molecular function	17	3322	0.0050	A2M,AMBP,ANGPTL3,ARHGDIB,B2M,CST3,FABP1,GIG25,HSPB1,IGF2,ITIH1,ITIH2,ITIH4,LIMS1,PSAP,SCGB3A1,SFTPB
GO:0051246	regulation of protein metabolic process	16	2668	0.0016	A2M,AMBP,C4BPA,CST3,FABP1,FGA,FGG,GIG25,HSPB1,IGF2,IGFBP4,IGLL5,ITIH1,ITIH2,ITIH4,PSAP
GO:0006955	immune response	15	1560	2.04e-05	ANPEP,B2M,C4BPA,CFD,CST3,DCD,FGA,FLG2,GIG25,HLA-B,IGLL5,LCN2,LRG1,LYZ,PSAP
GO:0032268	regulation of cellular protein metabolic process	15	2486	0.0027	A2M,AMBP,C4BPA,CST3,FABP1,FGA,FGG,GIG25,HSPB1,IGF2,IGFBP4,ITIH1,ITIH2,ITIH4,PSAP
GO:0050790	regulation of catalytic activity	15	2249	0.00100	A2M,AMBP,ANGPTL3,ARHGDIB,CST3,FABP1,GIG25,HSPB1,IGF2,ITIH1,ITIH2,ITIH4,LIMS1,PSAP,SFTPB
GO:0048584	positive regulation of response to stimulus	15	2054	0.00040	APOB,B2M,C4BPA,CFD,FGA,FGG,HLA-B,HSPB1,IGF2,IGFBP4,IGLL5,LIMS1,LRG1,PLA2G7,PSAP
GO:0010033	response to organic substance	14	2815	0.0186	ANGPTL3,APOB,B2M,CST3,FGG,HLA-B,HSPB1,IGF2,ITIH4,LCN2,LIMS1,PSAP,RBP4,UGGT1
GO:0050793	regulation of developmental process	14	2416	0.0060	ANGPTL3,APOB,ARHGDIB,B2M,CST3,FGA,FGG,HLA-B,HSPB1,IGF2,LIMS1,LRG1,RBP4,SCGB3A1
GO:0001775	cell activation	13	1024	7.23e-06	ANPEP,B2M,CFD,CST3,FGA,FGG,FLG2,GIG25,HLA-B,LCN2,LRG1,LYZ,PSAP
GO:0006952	defense response	13	1234	5.21e-05	B2M,C4BPA,CFD,CST3,DCD,FGA,GIG25,HLA-B,IGFBP4,IGLL5,ITIH4,LCN2,LYZ
GO:0002443	leukocyte mediated immunity	13	632	1.01e-07	ANPEP,B2M,C4BPA,CFD,CST3,FLG2,GIG25,HLA-B,IGLL5,LCN2,LRG1,LYZ,PSAP
GO:0010605	negative regulation of macromolecule metabolic process	13	2558	0.0215	A2M,AMBP,C4BPA,CST3,FABP1,FGA,GIG25,HSPB1,IGF2,ITIH1,ITIH2,ITIH4,LIMS1
GO:0051172	negative regulation of nitrogen compound metabolic process	13	2307	0.0113	A2M,AMBP,C4BPA,CST3,FABP1,FGA,GIG25,HSPB1,IGF2,ITIH1,ITIH2,ITIH4,LIMS1
GO:0051704	multi-organism process	13	2222	0.0085	AMBP,ANPEP,APOB,B2M,CST3,DCD,FGA,HLA-B,HSPB1,IGLL5,LCN2,LRG1,LYZ
GO:0002682	regulation of immune system process	13	1391	0.00016	A2M,AMBP,APOB,B2M,C4BPA,CFD,FGA,FGG,HLA-B,IGF2,IGLL5,PLA2G7,RBP4
GO:0031324	negative regulation of cellular metabolic process	12	2463	0.0349	A2M,AMBP,C4BPA,CST3,FABP1,GIG25,HSPB1,IGF2,ITIH1,ITIH2,ITIH4,LIMS1
GO:0043312	neutrophil degranulation	11	485	9.08e-07	ANPEP,B2M,CFD,CST3,FLG2,GIG25,HLA-B,LCN2,LRG1,LYZ,PSAP
GO:0002684	positive regulation of immune system process	11	882	8.01e-05	APOB,B2M,C4BPA,CFD,FGA,FGG,HLA-B,IGF2,IGLL5,PLA2G7,RBP4
GO:0009605	response to external stimulus	11	1857	0.0183	APOB,B2M,CST3,DCD,FGA,HLA-B,HSPB1,IGLL5,LCN2,LRG1,LYZ
GO:0080134	regulation of response to stress	11	1299	0.0016	A2M,AMBP,APOB,C4BPA,FGA,FGG,HLA-B,HSPB1,IGLL5,PLA2G7,PSAP
GO:0051336	regulation of hydrolase activity	11	1238	0.0011	A2M,AMBP,ANGPTL3,ARHGDIB,CST3,FABP1,GIG25,ITIH1,ITIH2,ITIH4,LIMS1
GO:0044092	negative regulation of molecular function	11	1119	0.00051	A2M,AMBP,ANGPTL3,B2M,CST3,FABP1,GIG25,HSPB1,ITIH1,ITIH2,ITIH4
GO:0051248	negative regulation of protein metabolic process	11	1075	0.00040	A2M,AMBP,C4BPA,CST3,FABP1,FGA,GIG25,HSPB1,ITIH1,ITIH2,ITIH4
GO:0002576	platelet degranulation	10	129	1.32e-10	A2M,CFD,FGA,FGG,GIG25,IGF2,ITIH4,LY6G6F,MMRN1,PSAP
GO:1902531	regulation of intracellular signal transduction	10	1764	0.0301	A2M,AMBP,ARHGDIB,FGA,FGG,HSPB1,IGF2,IGFBP4,LIMS1,PSAP
GO:0032269	negative regulation of cellular protein metabolic process	10	1014	0.0011	A2M,AMBP,C4BPA,CST3,FABP1,GIG25,HSPB1,ITIH1,ITIH2,ITIH4
GO:0050776	regulation of immune response	10	873	0.00040	A2M,AMBP,APOB,B2M,C4BPA,CFD,FGA,FGG,HLA-B,IGLL5
GO:0051707	response to other organism	10	835	0.00030	APOB,B2M,DCD,FGA,HLA-B,HSPB1,IGLL5,LCN2,LRG1,LYZ
GO:0043086	negative regulation of catalytic activity	10	809	0.00024	A2M,AMBP,ANGPTL3,CST3,FABP1,GIG25,HSPB1,ITIH1,ITIH2,ITIH4
GO:0030162	regulation of proteolysis	10	742	0.00012	A2M,AMBP,C4BPA,CST3,FABP1,GIG25,IGLL5,ITIH1,ITIH2,ITIH4
GO:0045861	negative regulation of proteolysis	9	349	3.61e-06	A2M,AMBP,C4BPA,CST3,FABP1,GIG25,ITIH1,ITIH2,ITIH4
GO:0051346	negative regulation of hydrolase activity	9	438	1.72e-05	A2M,AMBP,ANGPTL3,CST3,FABP1,GIG25,ITIH1,ITIH2,ITIH4
GO:0048585	negative regulation of response to stimulus	9	1483	0.0311	A2M,AMBP,C4BPA,FGA,FGG,HLA-B,HSPB1,IGFBP4,PSAP
GO:0051094	positive regulation of developmental process	9	1286	0.0177	ANGPTL3,APOB,FGA,FGG,HSPB1,IGF2,LIMS1,LRG1,SCGB3A1
GO:0006959	humoral immune response	8	252	3.93e-06	B2M,C4BPA,CFD,DCD,FGA,IGLL5,LCN2,LYZ
GO:0010951	negative regulation of endopeptidase activity	8	242	3.59e-06	A2M,AMBP,CST3,FABP1,GIG25,ITIH1,ITIH2,ITIH4
GO:0006629	lipid metabolic process	8	1192	0.0300	ANGPTL3,APOB,APOF,FABP1,PLA2G7,PSAP,RBP4,SFTPB
GO:0022603	regulation of anatomical structure morphogenesis	8	961	0.0125	ANGPTL3,CST3,FGA,FGG,HSPB1,LIMS1,LRG1,SCGB3A1
GO:0031347	regulation of defense response	8	676	0.0019	A2M,APOB,C4BPA,FGA,FGG,HLA-B,IGLL5,PLA2G7
GO:0050778	positive regulation of immune response	8	589	0.00091	APOB,B2M,C4BPA,CFD,FGA,FGG,HLA-B,IGLL5
GO:0009617	response to bacterium	8	555	0.00061	APOB,B2M,DCD,FGA,HLA-B,IGLL5,LRG1,LYZ
GO:0034097	response to cytokine	7	1035	0.0422	APOB,B2M,FGG,HLA-B,ITIH4,LCN2,LIMS1
GO:0044255	cellular lipid metabolic process	7	946	0.0314	ANGPTL3,APOB,FABP1,PLA2G7,PSAP,RBP4,SFTPB
GO:0032101	regulation of response to external stimulus	7	732	0.0125	A2M,C4BPA,FGA,FGG,HSPB1,IGLL5,PLA2G7
GO:0045087	innate immune response	7	676	0.0085	B2M,C4BPA,CFD,FGA,HLA-B,IGLL5,LCN2
GO:0072376	protein activation cascade	6	74	1.58e-06	A2M,C4BPA,CFD,FGA,FGG,IGLL5
GO:0044419	interspecies interaction between organisms	6	724	0.0348	AMBP,ANPEP,B2M,DCD,HLA-B,LYZ
GO:0043408	regulation of MAPK cascade	6	712	0.0328	AMBP,FGA,FGG,IGF2,IGFBP4,PSAP
GO:0010035	response to inorganic substance	6	491	0.0092	APOB,B2M,CST3,FABP1,FGA,FGG
GO:0002253	activation of immune response	6	393	0.0039	APOB,C4BPA,CFD,FGA,FGG,IGLL5
GO:0043687	post-translational protein modification	6	365	0.0028	APOB,CST3,FGA,FGG,IGFBP4,ITIH2
GO:0002697	regulation of immune effector process	6	362	0.0027	A2M,B2M,C4BPA,HLA-B,IGLL5,RBP4
GO:0010876	lipid localization	6	293	0.0010	ANGPTL3,APOB,APOF,FABP1,PSAP,RBP4
GO:0009611	response to wounding	5	547	0.0424	A2M,CST3,FGA,FGG,MMRN1
GO:0043410	positive regulation of MAPK cascade	5	512	0.0358	FGA,FGG,IGF2,IGFBP4,PSAP
GO:0050878	regulation of body fluid levels	5	483	0.0311	A2M,FGA,FGG,FLG2,MMRN1
GO:0019216	regulation of lipid metabolic process	5	373	0.0157	ANGPTL3,APOB,FABP1,GIG25,PSAP
GO:0045088	regulation of innate immune response	5	361	0.0144	A2M,APOB,FGA,FGG,HLA-B
GO:0043062	extracellular structure organization	5	339	0.0113	A2M,APOB,FGA,FGG,PLA2G7
GO:0006869	lipid transport	5	272	0.0053	APOB,APOF,FABP1,PSAP,RBP4
GO:0042742	defense response to bacterium	5	250	0.0040	B2M,DCD,FGA,IGLL5,LYZ
GO:0019730	antimicrobial humoral response	5	143	0.00045	B2M,DCD,FGA,LCN2,LYZ
GO:0050727	regulation of inflammatory response	4	338	0.0414	A2M,C4BPA,IGLL5,PLA2G7
GO:0002757	immune response-activating signal transduction	4	332	0.0400	APOB,FGA,FGG,IGLL5
GO:0062012	regulation of small molecule metabolic process	4	332	0.0400	APOB,FABP1,IGF2,IGFBP4
GO:0007596	blood coagulation	4	288	0.0299	A2M,FGA,FGG,MMRN1
GO:0006066	alcohol metabolic process	4	285	0.0298	ANGPTL3,APOB,APOF,RBP4
GO:0016042	lipid catabolic process	4	265	0.0250	ANGPTL3,APOB,FABP1,PLA2G7
GO:0050777	negative regulation of immune response	4	136	0.0043	A2M,AMBP,C4BPA,HLA-B
GO:2000257	regulation of protein activation cascade	4	54	0.00025	A2M,C4BPA,FGA,IGLL5
GO:0044242	cellular lipid catabolic process	3	167	0.0401	ANGPTL3,APOB,FABP1
GO:0045766	positive regulation of angiogenesis	3	162	0.0378	ANGPTL3,HSPB1,LRG1
GO:0002822	regulation of adaptive immune response based on somatic recombination of immune receptors built from immunoglobulin superfamily domains	3	135	0.0291	B2M,C4BPA,HLA-B
GO:0002706	regulation of lymphocyte mediated immunity	3	133	0.0283	B2M,C4BPA,HLA-B
GO:0007160	cell-matrix adhesion	3	119	0.0227	ANGPTL3,FGA,FGG
GO:0070613	regulation of protein processing	3	116	0.0216	A2M,C4BPA,IGLL5
GO:0002698	negative regulation of immune effector process	3	113	0.0210	A2M,C4BPA,HLA-B
GO:0050830	defense response to Gram-positive bacterium	3	111	0.0203	B2M,DCD,LYZ
GO:0008203	cholesterol metabolic process	3	109	0.0200	ANGPTL3,APOB,APOF
GO:0050829	defense response to Gram-negative bacterium	3	95	0.0157	B2M,DCD,LYZ
GO:0090277	positive regulation of peptide hormone secretion	3	95	0.0157	FGA,FGG,RBP4
GO:0002673	regulation of acute inflammatory response	3	92	0.0147	A2M,C4BPA,IGLL5
GO:0002224	toll-like receptor signaling pathway	3	87	0.0129	APOB,FGA,FGG
GO:0022600	digestive system process	3	68	0.0076	FABP1,GIG25,RBP4
GO:0030449	regulation of complement activation	3	52	0.0043	A2M,C4BPA,IGLL5
GO:0006956	complement activation	3	49	0.0038	C4BPA,CFD,IGLL5
GO:2000351	regulation of endothelial cell apoptotic process	3	46	0.0033	CD248,FGA,FGG
GO:1900026	positive regulation of substrate adhesion-dependent cell spreading	3	32	0.0013	FGA,FGG,LIMS1
GO:0030212	hyaluronan metabolic process	3	31	0.0012	ITIH1,ITIH2,ITIH4
GO:0072378	blood coagulation, fibrin clot formation	3	27	0.00095	A2M,FGA,FGG
GO:2000258	negative regulation of protein activation cascade	3	10	0.00010	A2M,C4BPA,FGA
GO:0045824	negative regulation of innate immune response	2	49	0.0379	A2M,HLA-B
GO:0019731	antibacterial humoral response	2	47	0.0369	B2M,FGA
GO:0006953	acute-phase response	2	45	0.0349	GIG25,ITIH4
GO:0010955	negative regulation of protein processing	2	44	0.0348	A2M,C4BPA
GO:0035272	exocrine system development	2	44	0.0348	CST3,IGF2
GO:1903202	negative regulation of oxidative stress-induced cell death	2	44	0.0348	HSPB1,PSAP
GO:0002707	negative regulation of lymphocyte mediated immunity	2	38	0.0298	C4BPA,HLA-B
GO:1902042	negative regulation of extrinsic apoptotic signaling pathway via death domain receptors	2	36	0.0278	FGA,FGG
GO:0006958	complement activation, classical pathway	2	34	0.0260	C4BPA,IGLL5
GO:0045907	positive regulation of vasoconstriction	2	33	0.0249	FGA,FGG
GO:2000352	negative regulation of endothelial cell apoptotic process	2	28	0.0203	FGA,FGG
GO:0002479	antigen processing and presentation of exogenous peptide antigen via MHC class I, TAP-dependent	2	25	0.0183	B2M,HLA-B
GO:0019433	triglyceride catabolic process	2	25	0.0183	APOB,FABP1
GO:0070527	platelet aggregation	2	25	0.0183	FGA,FGG
GO:0050996	positive regulation of lipid catabolic process	2	23	0.0165	ANGPTL3,FABP1
GO:0042730	fibrinolysis	2	21	0.0147	FGA,FGG
GO:0001916	positive regulation of T cell mediated cytotoxicity	2	17	0.0108	B2M,HLA-B
GO:0030277	maintenance of gastrointestinal epithelium	2	17	0.0108	GIG25,RBP4
GO:0060347	heart trabecula formation	2	15	0.0089	GPR126,RBP4
GO:0034116	positive regulation of heterotypic cell-cell adhesion	2	13	0.0076	FGA,FGG
GO:0034374	low-density lipoprotein particle remodeling	2	13	0.0076	APOB,PLA2G7
GO:0031639	plasminogen activation	2	11	0.0060	FGA,FGG
GO:0019885	antigen processing and presentation of endogenous peptide antigen via MHC class I	2	9	0.0045	B2M,HLA-B
GO:0045916	negative regulation of complement activation	2	9	0.0045	A2M,C4BPA
GO:0002480	antigen processing and presentation of exogenous peptide antigen via MHC class I, TAP-independent	2	8	0.0039	B2M,HLA-B
